# Supplementary material for: Bringing the uncultivated microbial majority of freshwater ecosystems into culture
Source: Research Square preprint supplement (doi:10.21203/rs.3.rs-6237413/v1), 2025-06-23
Supplement: Supplementary file 1 [file ee2e94d2ac18df10c2c5f482.xlsx]

## Sheet: index
Supplementary Data 1	Media components
Supplementary Data 2	Sampling details including metagenomic accession numbers and physico-chemical data collected during sampling.
Supplementary Data 3	Dilution-to-extinction cultivation details including taxonomy of 16S rRNA genes (SILVA) of cultures and GTDB assignment.
Supplementary Data 4	Results of statistical analyses used in this study
Supplementary Data 5	Raw data, maximum yield and growth rates from all growth assays with cultures.
Supplementary Data 6	Phylum-level classification of metagenomic reads with SingleM.
Supplementary Data 7	Genus-level classification of metagenomic reads with SingleM.
Supplementary Data 8	Phylum-level classification of 16S rRNA metagenomic reads with SILVA.
Supplementary Data 9	Genus/lineage-level classification of 16S rRNA metagenomic reads with SILVA.
Supplementary Data 10	Genus-level classification of 462 publicly available metagenomes with SingleM.
Supplementary Data 11	Details on genome-sequenced strains of the culture collection.
Supplementary Data 12	Details on metagenome-assembled genomes (MAGs) gained from the same water samples as cultures.
Supplementary Data 13	Details on publicly available reference genomes closely related to cultures.
Supplementary Data 14	Average nucleotide (ANI) matrices of cultures, MAGs and closely related reference genomes.
Supplementary Data 15	Average amino acid identity (AAI) matrix of cultures, MAGs and closely related reference genomes.
Supplementary Data 16	Metagenomic fragment recruitment of 67 samples taken from the same water samples as cultures.
Supplementary Data 17	Metagenomic fragment recruitment of 425 public datasets from six continents, including time-series metagenomes from two lakes. Genomes of cultures were dereplicated on a species level (95% ANI) and used as reference.
Supplementary Data 18	Selected metabolic modules (KEGG) present in the genomes.
Supplementary Data 19	Presence of CRISPR-Cas arrays in genomes from cultures, MAGs and closely related references.
Supplementary Data 20	Selected pathways related to methylotrophy present in the genomes.
Supplementary Data 21	Number and types of carbohydrate-active enzymes (CAZy) present in the genomes.

## Sheet: 1-media
Supplementary Data 1: Media components
ALW (artificial lake water) without carbon (prepared according to Zotina et al. 2003, Freshwater Biol 48:1859-1872; http://dx.doi.org/10.1046/j.1365-2427.2003.01134.x)
	f.c. uM	x H2O	g/M	g/L	STOCK x	STOCK M	STOCK ml	STOCK g	ad 1 L	unit	formula	C	final uM C	N	final uM N	S	final uM S	P	final uM P
Sodium bicarbonate	2000		84	0.168	500	1	200	16.8	2000	uL	NaHCO3	1	2000
Potassium nitrate	30		101.11	0.0030333	1000	0.03	100	0.30333	1000	uL	KNO3			1	30
Magnesium sulfate	200	7	246.31	0.049262	1000	0.2	100	4.9262	1000	uL	MgSO4					1	200
Calcium chloride	40	2	146.9	0.005876	1000	0.04	100	0.5876	1000	uL	CaCl2
Calcium sulfate	160	2	172.17	0.0275472	100	0.016	1000	2.75472	10000	uL	CaSO4					1	160
Ammonium chloride	30		53.46	0.0016038	1000	0.03	100	0.16038	1000	uL	NH4Cl			1	30
TES (trace element solution)					10000				100	uL	SUM		2000		60		360		0
med2: add med2 mix									100	uL
med3: add med2 + med3 mix									100	uL
Adjust pH to ~7.5
Autoclave, cool down, then add by filtration through 0.1 um filters (in clean bench):
											formula	C	final uM C	N	final uM N	S	final uM S	P	final uM P
med2 & 3:	f.c. uM	x H2O	g/M	g/L	STOCK x	STOCK M	STOCK ml	STOCK g	ad 1 L	unit
Dipotassium phosphate	3.22	3	228.17	0.000734707	10000	0.0322	100	0.734707	100	uL	K2HPO4							1	3.22
Vitamin mix									100	uL
Hemin									10	uL
AA mix									100	uL
Catalase			0.02				7		1000	uL
											SUM		0		0		0		3.22
MM-med
Dipotassium phosphate	3.22	3	228.17	0.000734707	10000	0.0322	100	0.734707	100	uL	K2HPO4							1	3.22
Vitamin mix									100	uL
Hemin									10	uL
AA mix									100	uL
MM mix									1000	uL
Lanthanum chloride	30	6	353.356	0.0106007	1000	0.03	100	1.06007	1000	uL	LaCl3
Important: don't mix lanthanum chloride with methanol for sterile filtration! Filter separately!											SUM		0		0		0		3.22
Preparation of stock solutions:
med2 mix	f.c. uM	x H2O	g/M	g/L	STOCK x	STOCK M	STOCK ml	STOCK g	100	uL/L	formula	C	final uM C	N	final uM N	S	final uM S	P	final uM P
D-Glucose	0.5		180.16	9.008e-05	10000	0.005	100	0.09008			C6H12O6	6	3
D-Ribose	0.5		150.13	7.5065e-05	10000	0.005	100	0.075065			C5H10O5	5	2.5
Sodium pyruvate	0.5		110.04	5.502e-05	10000	0.005	100	0.05502			C3H3NaO3	3	1.5
Sodium citrate	0.5	2	294.1	0.00014705	10000	0.005	100	0.14705			C6H5Na3O7	6	3
Oxaloacetic acid (freezer)	0.5		132.07	6.6035e-05	10000	0.005	100	0.066035			C4H4O5	4	2
Sodium acetate	0.5	3	136.08	6.804e-05	10000	0.005	100	0.06804			C2H3NaO2	2	1
Sodium succinate (Bernsteinsre)	0.5	6	270.15	0.000135075	10000	0.005	100	0.135075			C4H4Na2O4	4	2
N-Acetylglucosamine (freezer)	0.1		221.21	2.2121e-05	10000	0.001	100	0.022121			C8H15NO6	8	0.8	1	0.1
Glycerol	0.5		92.0473	4.60237e-05	10000	0.005	100	0.0460237	mL		C3H8O3	3	1.5
Urea	0.5		60.6	3.03e-05	10000	0.005	100	0.0303			CH4N2O	1	0.5	2	1
Taurine	0.5		125.14	6.257e-05	10000	0.005	100	0.06257			C2H7NO3S	2	1	1	0.5	1	0.5
Ethanol	0.5		46.07	2.3035e-05	10000	0.005	100	0.023035	mL		C2H6O	2	1
Sodium thiosulfate	0.5		158.11	7.9055e-05	10000	0.005	100	0.079055			Na2S2O3					1	0.5
											SUM		19.8		1.6		1		0
med3 mix	f.c. uM	x H2O	g/M	g / L	STOCK x	STOCK M	STOCK ml	STOCK g	100	uL/L	formula	C	final uM C	N	final uM N	S	final uM S	P	final uM P
putrescine	0.5		161.08	8.054e-05	10000	0.005	100	0.08054			NH2(CH2)4NH2	4	2	2	1
spermidine	0.5		254.63	0.000127315	10000	0.005	100	0.127315			C7H19N3	7	3.5	3	1.5
D-xylose	0.5		150.13	7.5065e-05	10000	0.005	100	0.075065			C5H10O5	5	2.5
D-arabinose	0.5		150.13	7.5065e-05	10000	0.005	100	0.075065			C5H10O5	5	2.5
glycolate	0.5		76.05	3.8025e-05	10000	0.005	100	0.038025			C2H4O3	2	1
											SUM		11.5		2.5		0		0
MM mix	f.c. uM	x H2O	g/M	g / L	STOCK x	STOCK M	STOCK ml	STOCK g	100	uL/L	formula	C	final uM C	N	final uM N	S	final uM S	P	final uM P
methanol	1000		32.04		1000	1	10	320	1000	uL	CH3OH	1	1000		0
methylamine	100		31.1		1000	0.1	10	77.8	1000	uL	CH5N	1	100	1	100
											SUM		1100		100		0		0
Amino acid mix	f.c. uM	x H2O	g/M	g/L	STOCK x	STOCK M	STOCK ml	STOCK g	100	uL/L	formula	C	final uM C	N	final uM N	S	final uM S	P	final uM P
Isoleucine	0.2		131.174	2.62347e-05	10000	0.002	100	0.0262347			C6H13NO2	6	1.2	1	0.2
Leucine	0.2		131.174	2.62347e-05	10000	0.002	100	0.0262347			C6H13NO2	6	1.2	1	0.2
Lysine	0.2		146.188	2.92376e-05	10000	0.002	100	0.0292376			C6H14N2O2	6	1.2	2	0.4
Methionine	0.2		149.212	2.98425e-05	10000	0.002	100	0.0298425			C5H11NO2S	5	1	1	0.2	1	0.2
Phenylalanine	0.2		165.19	3.3038e-05	10000	0.002	100	0.033038			C9H11NO2	9	1.8	1	0.2
Threonine	0.2		119.12	2.38239e-05	10000	0.002	100	0.0238239			C4H9NO3	4	0.8	1	0.2
Tryptophan	0.2		204.226	4.08452e-05	10000	0.002	100	0.0408452			C11H12N2O2	11	2.2	2	0.4
Valine	0.2		117.147	2.34294e-05	10000	0.002	100	0.0234294			C5H11NO2	5	1	1	0.2
Arginine	0.2		174.202	3.48403e-05	10000	0.002	100	0.0348403			C6H14N4O2	6	1.2	4	0.8
Histidine	0.2		155.155	3.1031e-05	10000	0.002	100	0.031031			C6H9N3O2	6	1.2	3	0.6
Alanine	0.2		89.0935	1.78187e-05	10000	0.002	100	0.0178187			C3H7NO2	3	0.6	1	0.2
Asparagine	0.2		132.118	2.64237e-05	10000	0.002	100	0.0264237			C4H8N2O3	4	0.8	2	0.4
Aspartate	0.2		133.103	2.66206e-05	10000	0.002	100	0.0266206			C4H7NO4	4	0.8	1	0.2
Cysteine	0.2		121.159	2.42318e-05	10000	0.002	100	0.0242318			C6H7NO2S	6	1.2	1	0.2	1	0.2
Glutamate	0.4		147.13	5.8852e-05	10000	0.004	100	0.058852			C5H9NO4	5	2	1	0.4
Glutamine	0.4		146.145	5.8458e-05	10000	0.004	100	0.058458			C5H10N2O3	5	2	2	0.8
Glycine	0.2		75.0669	1.50134e-05	10000	0.002	100	0.0150134			C2H5NO2	2	0.4	1	0.2
Proline	0.2		115.131	2.30262e-05	10000	0.002	100	0.0230262			C5H9NO2	5	1	1	0.2
Serine	0.2		105.093	2.10186e-05	10000	0.002	100	0.0210186			C3H7NO3	3	0.6	1	0.2
Tyrosine	0.2		181.189	3.62379e-05	10000	0.002	100	0.0362379			C9H11NO3	9	1.8	1	0.2
											SUM		24		6.4		0.4		0
Vitamin mix	f.c. uM	x H2O	g/M	g/L	STOCK x	STOCK M	STOCK ml	STOCK g	100	uL/L	formula	C	final uM C	N	final uM N	S	final uM S	P	final uM P
V B1 thiamine	0.593		337.27	0.000200001	10000	0.00593	100	0.200001			C12H17ClN4OS	12	7.116	1	0.593	1	0.593
V B3 niacin	0.08		122.12	9.7696e-06	10000	0.0008	100	0.0097696			C6H5NO2	6	0.48	1	0.08
V B12 Cobalamine	7.4e-05		1355.4	1.003e-07	10000	7.4e-07	100	0.0001003			C72H100CoN18O17P	72	0.005328	18	0.001332			1	7.4e-05
V Bx Para-amino benzoic acid	0.005		137.14	6.857e-07	10000	5e-05	100	0.0006857			C7H7NO2	7	0.035	1	0.005
V B6 pyridoxine	0.074		205.64	1.52174e-05	10000	0.00074	100	0.0152174			C8H11NO3	8	0.592	1	0.074
V B5 pantothenic acid	0.081		241.2	1.95372e-05	10000	0.00081	100	0.0195372			C9H17NO5	9		1
V B7 biotin	0.004		244.31	9.7724e-07	10000	4e-05	100	0.00097724			C10H16N2O3S	10	0.04	1	0.004	1	0.004
V B9 Folsäure	0.004		441.4	1.7656e-06	10000	4e-05	100	0.0017656			C19H19N7O6	19	0.076	1	0.004
Myo-inositol	0.555		180.16	9.99888e-05	10000	0.00555	100	0.0999888			C6H12O6	6	3.33
V B2 Riboflavin	0.01		376.36	3.7636e-06	10000	0.0001	100	0.0037636			C17H20N4O6	17	0.17	4	0.04
											SUM		11.8443		0.801332		0.597		7.4e-05
Trace element solution (TES)	f.c. uM	x H2O	g/M	g/L	STOCK x	STOCK M	STOCK ml	STOCK g	100	uL/L	formula	C	final uM C	N	final uM N	S	final uM S	P	final uM P
Na2-EDTA	0.134322		372.24	5e-05	10000	0.00134322	1000	0.5			C10H14N2Na2O8	10	1.34322	2	0.268644
FeSO4	0.0719387	7	278.015	2e-05	10000	0.000719387	1000	0.2			FeSO4					1	0.0719387
ZnSO4	0.0347754	7	287.56	1e-05	10000	0.000347754	1000	0.1			ZnSO4					1	0.0347754
MnCl2	0.0151584	4	197.91	3e-06	10000	0.000151584	1000	0.03			MnCl2
H3Bo3	0.485201		61.83	3e-05	10000	0.00485201	1000	0.3			H3Bo3
CoCl2	0.0840583	6	237.93	2e-05	10000	0.000840583	1000	0.2			CoCl2
CuCl2	0.00680226	2	147.01	1e-06	10000	6.80226e-05	1000	0.01			CaCl2
NiCl2	0.00841432	6	237.69	2e-06	10000	8.41432e-05	1000	0.02			NiCl2
NaMoO4	0.0123993	2	241.95	3e-06	10000	0.000123993	1000	0.03			NaMoO4
Na2SeO3	0.001		172.948	1.72948e-07	10000	1e-05	1000	0.00172948			Na2SeO3
											SUM		1.34322		0.268644		0.106714
Catalase
Make fresh stocks whenever needed, 0.02 g catalase + 7 ml MQ. Filter sterile, add 1 ml/L
NSY (Nutrient broth, soyotone, yeast extract, Hahn 2003)
	f.c.uM	x H2O	g/M	mg/L
MgSO4	304.494	7	246.31	75
Ca(NO3)2	182.188	4	236.02	43
NaHCO3	190.476		84	16
KCl	20.1207		74.55	1.5
K2HPO4	16.216	3	228.17	3.7
Na2EDTA-Fe	16.9133		302.72	5.12
FeCl3	11.8453	6	270.15	3.2
H3BO3	16.1786		61.81	1
MnCl2	1.01092	4	197.84	0.2
ZnSO4	0.0900901	7	222	0.02
CuSO4	0.0373762	6	267.55	0.01
CoCl2	0.0420468	6	237.83	0.01
NaMoO4	0.0274048	2	218.94	0.006
NiCl2	0.420858	6	237.61	0.1
Nutrient broth peptone				1000
Soyotone peptone				1000
Yeast extract				1000

## Sheet: 2-sampling details
Supplementary Data 2: Sampling details including metagenomic accession numbers and physico-chemical data collected during sampling.
Lake	Country	Coordinates	Biogeographic region	Altitude (m)	Max depth (m)	Area (km2)	Mixis type	Water retention time (years)	Trophic status	Additional features	Sampling date	Water layer	Depth	Sample name	Illumina accession number (ENA)	Oxford Nanopore accession number (ENA)	Temperature (°C)	Conductivity (µS/cm - assessed in situ with a YSI EXO3 probe)	Oxygen (mg/l)	Oxygen sat.	pH	Chl a (ug/L)	Green Algae (ug/L)	Bluegreen (ug/L)	Diatoms (ug/L)	Cryptophyta (ug/L)	Planktothrix (ug/L)	pH	Conductivity (µS/cm - assessed in the lab)	DOC (mg/l)	DP (µg/l)	DRP (µg/l)	Alkalita	Cl (mg/l)	NO3-N (mg/l)	SO4 (mg/l)	NO2-N (mg/l)	F (mg/l)	Na (mg/l)	NH4-N (mg/l)	K (mg/l)	Ca (mg/l)	Mg (mg/l)	DN (mg/l)
Attersee	Austria	47°52′ N 13°32′ E	subalpine*	469	171	46.2	dimictic	7	Ultraoligotrophic	Natural lake	2019-05-03	Epilimnion	5	AE-03may19	ERR3719149		8.8	292	12.1	104.4	8.3	0.6						8.116	272	1.26	1.4	0.8	2638.93	5.67	0.45	4.81		0.04	4.058		0.742	41.111	7.5937	0.63
											2019-10-24			AE-24oct19	ERR5863100		14.8348	297.176	10.0924	78.3356	8.05237	0						8.22	259	1.58	1.2	0	2456.47	6.2624	0.43	4.6492	0.005	0.02	4.62902		0.729	27.4786	8.7696	0.6
											2019-05-03	Hypolimnion	150	AH-03may19	ERR3719150		4.61604	296	11.376	88.2604	8.1	0.522453						7.967	282	1.37	1.5	0.7	2679.6	6.16	0.47	5.16		0.04	4.269		0.785	42.3488	7.8384	0.67
											2019-10-24			AH-24oct19	ERR5863101		4.63745	271	10.1519	100.319	8.59712	0.103427						7.968	289	1.3	1.3	0.4	2705.63	6.4581	0.561	5.1094		0.03	4.71912		0.816	39.7495	9.18423	0.68
Greifensee	Switzerland	47°22’ N 8°42’ E	subalpine*	435	32	8.5	dimictic	1.1	Eutrophic	Natural lake	2019-04-03	Epilimnion	5	GE-03apr19	ERR3719142		8.6	504	13.7	117.7		16.7	5	0	8.1	3.5	0	8.2	478	3.85	20.7	7.7	3503.88	37.56	1.48	14.999	0.035	0.04	23.507		3.413	49.7338	13.9391	1.78
											2019-11-07			GE-07nov19	ERR5863102		13.07	484	8.47773	80.6773		6.34667	4.32	0.78	0	0	1.25667	8.109	455	3.51	10.7	3.9	3360.12	34.37	1.543	13.17	0.032	0.05	22.174	0.066	3.63413	58.484	14.2758	1.89
											2019-11-07	Hypolimnion	20	GH-07nov19	ERR5863103		11.7298	516.455	8.54634	78.9049		3.58333	1.825	0.02	0	0	1.74	8.027	467	3.48	15.6	8.5	3517.01	35.32	1.464	13.61	0.037	0.06	22.067	0.044	3.68333	60.6214	14.5066	1.8
Lugano	Italy	45°59′ N 8°58′ E	subalpine*	271	288	28	meromictic	8.2	Eutrophic	Natural lake	2019-04-02	Epilimnion	5	LE-02apr19	ERR3719145		8.7	175.3	10.6	91.5	8.5	11						8.033	251	1.43	4.2	0.8	2259.84	3.49	0.18	11.5328		0.08	3.017		0.933	32.7362	8.7149	0.38
											2019-11-05			LE-05nov19	ERR5863104		15.815	186.62	8.4	85	8.563							8.306	217	1.45	4.5	0.9	1952.53	3.41	0.151	9.8	0.004	0.06	3.229	0.012	0.857143	32.8406	8.4383	0.32
											2019-04-02	Hypolimnion	50	LH-02apr19	ERR3719146		5.9	164.3	7	56.4	7.8	2.1						7.777	251	1.16	13.6	10.5	2280.77	3.47	0.28	11.8826		0.09	2.875		0.938	34.6463	8.6757	0.45
											2019-11-05			LH-05nov19	ERR5863105		6.1153	168.47	5.14	41.5	7.764							7.876	255	1.11	2.7	0.9	2311.65	3.22	0.33	9.79		0.09	3.029		0.878571	39.3021	8.8449	0.5
Maggiore	Italy	45°58’ N 8°39’ E	subalpine*	193	370	212.5	monomictic	4	Oligo-mesotrophic	Natural lake	2019-04-09	Epilimnion	5	MaE-09apr19	ERR3719143		8.8978	143.9	11.72		7.94	8.002	2.64	0	5.364	0		7.553	167.2	0.81	2.8	0.9	795.231	3.21	0.58	30.5704		0.07	3.002		1.18	23.6788	3.2939	0.72
											2019-11-04			MaE-04nov19	ERR5863106		14.6475	138.3	9.13		7.73	2.94381	0.198571	0	2.42286	0		7.52	152.1	0.95	3.1	0.7	775.26	2.76	0.496	23.07		0.06	2.843		1.10556	21.5765	2.8365	0.66
											2019-04-09	Hypolimnion	300	MaH-09apr19	ERR3719144		6.7838	152.7	4.44		7.15	0						7.365	171.8	0.74	20.5	18.5	846.536	3.13	0.66	32.5208		0.07	2.89		1.245	24.4713	3.4091	0.78
											2019-11-04			MaH-04nov19	ERR5863107		6.7944	152.4	5.38		7.2	0						7.247	139.5	0.59	20.5	17.4	857.103	2.7	0.617	25.67		0.07	2.967		1.16429	23.1974	3.3501	0.79
Medard	Czechia	50°10′ N 12°35′ E	continental*	400	50	4.9	dimictic/meromictic	-	Oligo-mesotrophic	Postmining lake	2019-04-08	Epilimnion	5	ME-08apr19	ERR3719153		5.65372	1316.86	12.6991	101.535	7.50087	0.835116	0.128372	0	0.195349	0.511395		7.50087	1316.86			0.005		26	1.6	470	0.008			0.03		91.9	43.6
											2019-07-09			ME-09jul19	ERR3719159		21.4079	1343.39	8.83899	100.39	6.7544	2.28	1.035	0.385	0.795	0.065		7.803	1280	3.12	1.4	0.1	1640.42	25.2	1.16	615.91	0.049	0.38	102.556		6.46818	126.459	56.096	1.28
											2019-10-21			ME-21oct19	ERR5863108		12.8805	1341.34	10.28	97.6585	8.24756	2.09261	0	0	1.34304	0.749565		7.885	1286	3.14	1.6	0	1602.5	27.9645	1.218	732.874	0.009	0.36	99.9919		8.765	121.413	57.9102	1.26
											2021-05-04			ME-04may21	ERR13340455	ERR13385611
											2019-04-08	Hypolimnion	30	MH-08apr19	ERR3719154		4.7163	1318.9	12.6114	98.4184	7.48046	0.681633	0	0.167347	0.475102	0.0391837		7.48046	1318.9			0.005		27	1.6	480	0.005			0.12		91.8	43.4
											2019-07-09			MH-09jul19	ERR3719160		6.15029	1321.68	11.2718	91.2637	7.92636	1.34107	0	0	0.643929	0.697143		7.725	1243	2.78	1.6	0.7	1589.43	25.08	1.29	605.22	0.021	0.37	105.69		6.33818	128.828	57.6015	1.29
											2019-10-21			MH-21oct19	ERR5863109		6.39797	1327.21	10.079	82.1369	7.51279	3.1	0	0	0	3.1		7.513	1264	2.81	1.6	0	1602.47	25.3483	1.363	665.024	0.005	0.34	102.991		8.833	124.591	57.677	1.47
Milada	Czechia	50°38′ N 13°56′ E	continental*	137	20	2.5	dimictic	-	Oligo-mesotrophic	Postmining lake	2019-04-16	Epilimnion	5	MiE-16apr19	ERR3719155		8.23846	1258.8	13.511	115.21	8.28	12.1126	4.60704	0	5.74704	1.76852		8.28	1258.8			0.5		61	0.05	295	0.001			0.03		33.6	42.6
											2019-07-22			MiE-22jul19	ERR3719162		21.069	1269.76	11.8243	133.268	8.73	5.13185	1.34519	0	3.4963	0.29037		8.696	1200	6.8	4.3	1	5180.94	64.67	0	315.6		0.75	177.486		17.4182	38.1582	54.1218	0.48
											2019-10-14			MiE-14oct19	ERR5863110		14.5702	1264.78	10.5011	103.546	9.0323	4.17852	2.99	0.25	0.759259	0.178519		8.777	1216	7.19	4.9	0.6	5086.43	69.1439	0.003	352.065		0.86	161.539		22.575	32.7613	50.177	0.6
											2019-04-16	Hypolimnion	15	MiH-16apr19	ERR3719156		6.20922	1262.2	11.9603	97.0187	8.08052	12.9559	2.13405	0.0864865	9.24378	1.49162		8.08052	1262.2			0.5		61	0.26	295	0.003			0.06		33.3	41.8
											2019-07-22			MiH-22jul19	ERR3719163		6.58275	1278.78	0.08	0.6	8.82	0.676923	0	0.676923	0	0		8.201	1206	6.15	10.5	2.2	5336.29	61.37	0.07	298.73	0.388	0.69	162.704	0.061	16.0454	39.0973	49.9359	0.72
											2019-10-14			MiH-14oct19	ERR5863111		7.61924	1282.54	0	0	7.67631	3.71333	0	0.651667	0	3.07167		7.762	1242	6	17.8	4	5678.75	68.2684	0.005	338.707	0.001	0.83	160.628	0.193	22.523	44.5159	52.3192	0.88
Mondsee	Austria	47°49’ N 13°22’ E	subalpine*	483	68	14.2	dimictic	1.7	Mesotrophic	Natural lake	2019-05-02	Epilimnion	5	MoE-02may19	ERR3719147		13.8		10.36		8.49	1.1						8.319	337	1.98	2.8	0.5	3270.59	10.64	0.32	4.36		0.04	7.548		1.115	51.5162	8.8617	0.58
											2019-10-23			MoE-23oct19	ERR5863112		10	360.6	12.6	111.3	8.4	1.1						8.247	319	2.32	2.4	1.9	2917.45	9.6717	0.24	4.2008		0.03	7.15182		1.126	36.9007	9.6707	0.48
											2019-05-02	Hypolimnion	40	MoH-02may19	ERR3719148		4.67		6.3		7.77	0						8.037	355	1.76	2.7	0.8	3254.86	10.85	0.39	4.28		0.04	7.553		1.129	53.2454	8.5606	0.62
											2019-10-23			MoH-23oct19	ERR5863113		4.6	364	11.8	91.3	8.1	0.7						7.916	354	1.8	2.9	1.1	3282.53	11.8553	0.543	4.5194		0.04	7.8016		1.297	44.3574	9.52595	0.7
Most	Czechia	50°31′ N 13°37′ E	continental*	199	75	3.11	dimictic	-	Oligo-mesotrophic	Postmining lake	2019-04-30	Epilimnion	5	MsE-30apr19	ERR3719157		11.2417	664.5	11.8297	108.098	8	1.75388	0.121493	0.26194	1.31776	0.0459701		7.88	618	3.62	3.1	0.4	1755	25.82	0.66	205.75	0.005	0.47	44.705		8.279	57.7318	25.9666	1.02
											2019-07-30			MsE-30jul19	ERR3719164	ERR13385610	21.9139	670.373	11.1338	127.369	8.73	1.67714	0.325	0.777143	0.137857	0.445714		7.95	643	3.93	2	0.4	1735	29.631	0.604	235.397	0.008	0.5	47.7803		8.7944	59.7304	28.8135	0.97
											2019-10-01			MsE-01oct19	ERR5863114		22.2354	671.12	10.0321	115.441	8.98	1.96227	0.129545	0.0327273	1.135	0.673636		8.209	641	4.05	3.3	0.3	1779.02	30.076	0.469	230.478	0.007	0.47	47.9406		10.708	51.8461	31.0258	0.81
											2019-04-30	Hypolimnion	50	MsH-30apr19	ERR3719158		4.543	666.7	12	93.0002	7.58	1.94613	0	1.67355	0	0.272581		7.93	624	3.45	2.9	0.7	1715	26.73	0.73	210.52		0.61	43.45		7.899	55.9475	25.0827	1.08
											2019-07-30			MsH-30jul19	ERR3719165		4.83079	668.687	9.10528	71.1396	7.42066	1.47846	0	0.652308	0	0.826154		7.72	626	3.13	2.5	0.4	1761	29.9166	0.947	235.939	0.011	0.52	45.5185	0.03	8.4856	58.502	27.0114	1.21
											2019-10-01			MsH-01oct19	ERR5863115		4.89864	669.37	8.20282	64.1836	7.6405	1.95596	0	0.958298	0	0.99766		7.632	648	3.13	3	0	1747.34	28.4383	0.862	220.023		0.54	45.3616		10.677	55.559	29.9049	1.15
Thun	Switzerland	46°41′ N 7°43′ E	alpine*	558	217	48.3	monomictic	1.8	Ultraoligotrophic	Natural lake	2019-04-08	Epilimnion	5	TE-08apr19	ERR3719139		7.43	282.71	11.41	101.87	7.93	1.25						7.875	276	0.67	1.4	0.4	2025.57	1.74	0.36	37.0682	0.014	0.06	1.645		0.55	46.0112	4.5217	0.51
											2019-11-11			TE-11nov19	ERR5863116		11.88	235.44	10		7.99	1.26						7.987	231	0.59	1	1	1731.95	1.04	0.28	24.57		0.07	1.429		0.369841	43.3646	3.873	0.43
											2019-04-08	Hypolimnion	180	TH-08apr19	ERR3719140		5.45	307.06	9.06	76.89	7.76	0.49						7.904	298	0.63	1	0.3	2157.86	1.79	0.41	42.2092	0.012	0.07	1.802		0.59	57.085	5.3278	0.55
											2019-11-11			TH-11nov19	ERR5863117		5.48	308.36	8.5		7.68	0.37						7.901	299	0.57	1	1.1	2196.05	1.65	0.451	35.99		0.07	1.837		0.433333	56.2015	4.9412	0.6
Traunsee	Austria	47°52′ N 13°48′ E	subalpine*	423	191	24.4	monomictic	1	Oligotrophic	Natural lake, chloride deposition in deep hypolimnion	2019-05-03	Epilimnion	5	TrE-03may19	ERR3719151		8.3	283	11.9	101.6	8.3	2						8.03	264	1.81	1.7	0.8	2417.33	8.29	0.44	5.23		0.03	4.292		0.476	40.9715	5.8392	0.63
											2019-10-25			TrE-25oct19	ERR5863118		12.742	245.6	10.3706	98.0059	8.50059	0.934708						8.105	237	1.7	1.8	0.3	2228.43	4.5423	0.389	4.13		0.02	3.20862		0.285	32.0272	5.78398	0.55
											2019-05-03	Hypolimnion	150	TrH-03may19	ERR3719152		5.1	303.622	11	86.7	8.15378	0.395862						7.987	296	1.69	3.4	2.1	2537.33	13.2664	0.601	6.1714		0.03	5.77488		0.739	44.6014	7.88364	0.71
											2019-10-25			TrH-25oct19	ERR5863119		5.405	310.1	8.72	69.8	8.14	0.241667						7.95	278	1.75	3	1.6	2472.79	10.83	0.5	5.28		0.03	5.494		0.563	49.5194	6.9777	0.68
Zlutice	Czechia	50°05’ N 13°07’ E	continental*	497	17	1.61	dimictic	-	Eutrophic	Reservoir	2019-04-24	Epilimnion	5	ZLE-24apr19	ERS16387282		9.55054	271.298	12.0096	105.392	7.3498	11.9418	3.53659	1.11341	7.14545	0.137727		7.558	266	6.13	9.1	1.2	718.858	24.7	1.81	39.9168	0	0.11	13.515	0	3.013	21.0725	6.9583	2.29
											2019-08-06			ZLE-06aug19	ERS16387284		19.2207	292.169	2.16011	23.557	7.07099	8.54488	0	6.36951	2.16	0.00560976		7.393	282	5.88	5.2	1	941.52	26.14	0.82	45.4384	0	0.13	16.2937	0.072	3.73	25.4723	9.15673	1.46
											2019-11-19			ZLE-19nov19	ERS16387286		7.821	303.213	7.95	66.9	7.18	16.169	0	16.169	0	0		7.499	296	6.38	8.4	2.3	1135.09	27.67	0.13	42.234	0.0108	0.15	18.0831	0.069	4.3888	24.9514	9.51776	0.83
											2019-04-24	Hypolimnion	15	ZLH-24apr19	ERS16387283		5.937	270.8	9.54	76.6	7.11	1.82068	0	0.562955	0.555	0.696136		7.252	263	6.24	8.5	1.6	703.238	26.03	1.96	41.4176	0	0.11	14.548	0.014	3.211	22.3351	7.3741	2.34
											2019-08-06			ZLH-06aug19	ERS16387285		9.20029	281.985	0.04	0.397059	6.92941	0.704783	0	0.704783	0	0		7.139	279	6.01	9.2	3.4	963.297	25.29	1.1	42.9184	0	0.12	15.0782	0.151	3.43909	24.6196	8.39545	1.78
											2019-11-19			ZLH-19nov19	ERS16387287		7.81814	303.288	7.96	67	7.23632	15.1444	0	15.1444	0	0		7.345	296	6.4	9.9	1.9	1083.33	29.79	0.14	45.3298	0.012	0.16	18.2878	0.058	4.46	22.9051	9.59494	0.77
Klicava	Czechia	50°03’ N 13°55’ E	continental*	299.2	34	0.71	dimictic	-	Mesotrophic	Reservoir	2019-04-25	Epilimnion	5	KE-25apr19	ERS16387266		10.9631	548.287	12.9151	117.238	8.15493	1.49333	0	0.533333	0.743333			8.231	528	5.05	10.3	2.1	2510.3	21.3	0.08	127.289	0	0.13	16.491	0	3.898	71.7655	18.0378	0.54
											2019-08-07			KE-07aug19	ERS16387268		21.4409	541.971	10.9464	124.067	8.49045	7.09538	0	0	6.28	0.815385		8.214	516	5.1	6.8	0.4	2189.3	21.93	0.01	142.087	0	0.18	16.726	0	3.42373	67.4606	18.3296	0.37
											2019-11-20			KE-20nov19	ERS16387270		8.77118	553.3	8.65589	74.6589	7.81	1.38214	0	0.265714	0.0242857	1.09607		7.94	539	5.44	17.2	10.7	2408.59	20.88	0.08	132.011	0.0046	0.15	18.2322	0.038	3.9352	74.35	21.7155	0.56
											2019-04-25	Hypolimnion	15	KH-25apr19	ERS16387267		4.11186	580.046	2.54859	19.5644	7.19893	0.356552	0	0.356552	0			7.679	549	4.96	88.8	88.4	2598.31	19.14	0.54	115.193	0	0.12	15.909	0	3.845	74.9748	17.493	1.04
											2019-08-07			KH-07aug19	ERS16387269		4.57402	589.5	0	0	7.36	0.557059	0	0.557059	0	0		7.624	565	5.24	289.4	306.8	2980.92	21.04	1.58	128.568	0	0.17	16.661	0.637	3.65593	80.101	17.1957	1.03
											2019-11-20			KH-20nov19	ERS16387271		4.82235	595.043	0	0	7.13	0.615778	0	0.615778	0	0		7.596	576	5.51	429.2	435.2	3329.22	20.38	0.157	106.968	0.007	0.19	17.1444	1.254	3.9592	83.7919	21.915	1.58
Zurich	Switzerland	47°18’ N 8°34’ E	subalpine*	406	136	88.7	monomictic	1.4	Oligo-mesotrophic	Natural lake	2019-04-03	Epilimnion	5	ZE-03apr19	ERR3719137	ERR12709013	6.7	296	13	106.2		10	0	0	0.4	3.3	6.3	8.034	279	1.55	7.9	1	2439.83	6.17	0.48	13.8966	0.004	0.06	4.506		0.857	44.0012	5.5306	0.67
											2019-11-13			ZE-13nov19	ERR5863120	ERR12709014	12.33	272	9.21	86.1116		5.615	0	0.35	0	0.2925	4.965	8.069	260	1.39	2.8	0.9	2260.85	4.25	0.459	12.19		0.05	3.648		0.689683	48.0886	5.3723	0.64
											2019-04-03	Hypolimnion	80	ZH-03apr19	ERR3719138		4.7	303	8.1	63		1.7	0	0.2	0	0	1.5	7.819	286	1.37	24.4	20.6	2507.81	5.6	0.54	13.2712		0.06	4.35		0.922	49.4312	5.4885	0.73
											2019-11-13			ZH-13nov19	ERR5863121		4.85	307	6.0567	47.267		0	0	0	0	0	0	7.793	293	1.2	36.4	35.9	2571.2	5.72	0.632	12.01		0.06	4.375		0.811111	51.3761	5.3862	0.78
Rimov	Czechia	48°50’ N 14°29’ E	continental*	470	43	2.1	dimictic	0.3	Eutrophic	Reservoir	2019-04-23	Epilimnion	0.5	RE-23apr19	ERS16387244		8.46476	110.672	10.2494	87.567	6.74202	5.08333	0.303333		1.79875	1.72333		9.69	116.2	7.54	7.5	2.1	541.956	6.63	0.14	11.0058	0	0.08	6.85638	0	1.832	10.6772	2.23811	0.58
											2019-08-26			RE-26aug19	ERS16387252		23.274	129.7	11.9554	140.181	10.0196	41.5259	34.2029	2.38706	1.99765	2.94		7.14	116.1	6.21	15.3	9.3	565.724	7.4	0.689	10.47	0.004	0.1	7.068	0.00614	1.83889	10.1425	2.1966	0.99
											2019-11-18			RE-18nov19	ERS16387260		9.10296	121.7	6.15003	53.4	6.71	2.92103	0	2.61069	0.27	0.0403448		7.239	107.3	6.38	9.2	1.5	380.659	5.7375	1.31	12.5023	0	0.09	5.597	0	1.56	9.49025	1.9013	1.75
											2019-04-23	Hypolimnion	30	RH-23apr19	ERS16387245		4.15803	129.015	9.39836	72.0442	6.79	0.296429	0		0	0		6.964	121.5	6.6	22.2	12.2	420.858	7.106	1.79	13.2741	0	0.08	6.683	0	1.785	10.9563	2.2917	2.14
											2019-08-26			RH-26aug19	ERS16387253		4.41558	128.89	2.32776	17.9356	6.62	1.345	0.0107143	0.8	0.531607	0		7.072	122.8	6.41	19.7	10.2	469.336	7.99	1.46	12.954	0	0.08	6.86596	0	1.825	12.0697	2.62113	1.96
											2019-11-18			RH-18nov19	ERS16387261		4.57713	131.974	0	0	6.55914	0.876341	0	0.814634	0.00560976	0.0560976		6.982	129.4	6.32	24.2	16.4	636.841	8.18	0.729	10.36	0	0.09	6.796	0.327	1.91032	11.1899	2.4728	1.47

## Sheet: 3-dte-overview
Supplementary Data 3: Dilution-to-extinction cultivation details including taxonomy of 16S rRNA genes (SILVA) of cultures and GTDB assignment.
lake	Attersee	Attersee	Thun	Thun	Traunsee	Traunsee	Most	Most	Most	Medard	Medard	Maggiore	Maggiore	Zurich	Zurich	Mondsee	Mondsee	Milada	Milada	Milada	Klicava	Klicava	Lugano	Lugano	Rimov	Rimov	Rimov	Greifensee	Greifensee	Zlutice	Zlutice	Attersee	Attersee	Thun	Thun	Traunsee	Traunsee	Most	Most	Most	Medard	Medard	Maggiore	Maggiore	Zurich	Zurich	Mondsee	Mondsee	Milada
epi/hypo	epi	epi	epi	epi	epi	epi	epi	epi	epi	epi	epi	epi	epi	epi	epi	epi	epi	epi	epi	epi	epi	epi	epi	epi	epi	epi	epi	epi	epi	epi	epi	hypo	hypo	hypo	hypo	hypo	hypo	hypo	hypo	hypo	hypo	hypo	hypo	hypo	hypo	hypo	hypo	hypo	hypo
spring/summer/autumn	spring	autumn	spring	autumn	spring	autumn	spring	summer	autumn	summer	autumn	spring	autumn	spring	autumn	spring	autumn	spring	summer	autumn	spring	autumn	spring	autumn	spring	summer	autumn	spring	autumn	spring	autumn	spring	autumn	spring	autumn	spring	autumn	spring	summer	autumn	summer	autumn	spring	autumn	spring	autumn	spring	autumn	spring
trophic state	ultra-oligotrophic	ultra-oligotrophic	ultra-oligotrophic	ultra-oligotrophic	oligotrophic	oligotrophic	oligo-mesotrophic	oligo-mesotrophic	oligo-mesotrophic	oligo-mesotrophic	oligo-mesotrophic	oligo-mesotrophic	oligo-mesotrophic	oligo-mesotrophic	oligo-mesotrophic	oligo-mesotrophic	oligo-mesotrophic	oligo-mesotrophic	oligo-mesotrophic	oligo-mesotrophic	oligo-mesotrophic	oligo-mesotrophic	eutrophic	eutrophic	eutrophic	eutrophic	eutrophic	eutrophic	eutrophic	eutrophic	eutrophic	ultra-oligotrophic	ultra-oligotrophic	ultra-oligotrophic	ultra-oligotrophic	oligotrophic	oligotrophic	oligotrophic	oligotrophic	oligotrophic	oligotrophic	oligotrophic	oligo-mesotrophic	oligo-mesotrophic	oligo-mesotrophic	oligo-mesotrophic	oligo-mesotrophic	oligo-mesotrophic	oligo-mesotrophic
culture-label prefix	AE	AE	TE	TE	TrE	TrE	MsE	MsE	MsE	ME	ME	MaE	MaE	ZE	ZE	MoE	MoE	MiE	MiE	MiE	KE	KE	LE	LE	RE	RE	RE	GE	GE	ZlE	ZlE	AH	AH	TH	TH	TrH	TrH	MsH	MsH	MsH	MH	MH	MaH	MaH	ZH	ZH	MoH	MoH	MiH
# wells inoculated	96	96	144	96	96	96	96	96	96	96	96	144	96	96	96	48	96	96	96	96	96	96	96	96	96	96	96	192	96	96	96	96	96	144	96	96	96	96	96	96	96	96	144	96	96	96	144	96	96
cells/well inoculated	1.875	1.875	1.58333	1.875	1.875	1.875	1.875	1.875	1.875	1.875	1.875	1.58333	1.875	1.875	1.875	1.875	1.875	1.875	1.875	1.875	1.875	1.875	1.875	1.875	1.875	1.875	1.875	1.5625	1.875	1.875	1.875	1.875	1.875	1.58333	1.875	1.875	1.875	1.875	1.875	1.875	1.875	1.875	1.58333	1.875	1.875	1.875	1.4375	1.875	1.875
# inital cultures	15	20	23	18	19	26	14	38	22	31	19	16	18	8	13	5	34	21	23	20	11	12	5	27	31	25	52	19	19	28	29	6	14	6	5	9	36	9	31	16	22	15	4	11	0	7	21	24	16
# additional cultures after redilutions								1				1		1						2	1
% isolation success	15.625	20.8333	15.9722	18.75	19.7917	27.0833	14.5833	39.5833	22.9167	32.2917	19.7917	11.1111	18.75	8.33333	13.5417	10.4167	35.4167	21.875	23.9583	20.8333	11.4583	12.5	5.20833	28.125	32.2917	26.0417	54.1667	9.89583	19.7917	29.1667	30.2083	6.25	14.5833	4.16667	5.20833	9.375	37.5	9.375	32.2917	16.6667	22.9167	15.625	2.77778	11.4583	0	7.29167	14.5833	25	16.6667
viability (%)	9.06128	12.4595	10.9909	11.0741	11.7623	16.8455	8.40688	26.8749	13.8818	20.7979	11.7623	7.43893	11.0741	4.64061	7.7604	5.86671	23.3181	13.1659	14.6074	12.4595	6.4905	7.12167	2.85273	17.6129	20.7979	16.089	41.6085	6.66904	11.7623	18.3915	19.1816	3.44205	8.40688	2.68798	2.85273	5.25014	25.0669	5.25014	20.7979	9.72382	13.8818	9.06128	1.77921	6.4905	0	4.03796	10.9655	15.343	9.72382
viability axenic (%)	1.69326	5.86671	5.97575	4.64061	5.86671	8.40688	5.25014	11.0741	7.12167	8.40688	7.12167	6.94742	4.64061	5.25014	4.03796	2.26985	13.8818	10.3947	9.06128	7.7604	2.85273	1.69326	1.69326	12.4595	12.4595	11.7623	1.12285	5.56873	7.7604	11.0741	7.12167	0.558469	1.69326	2.68798	0.558469	1.12285	14.6074	2.85273	15.343	6.4905	4.03796	3.44205	1.32969	2.85273	0	0.558469	2.96067	9.06128	4.64061
# cultures with no growth after 3-4 propagations	8	9	9	10	7	8	4	18	10	15	3	1	5	0	3	3	10	4	7	8	3	5	1	3	8	4	2	0	2	5	11	1	11	0	3	7	8	4	0	4	14	4	0	4	0	5	9	7	5
# mixed cultures	4	1	1	0	2	4	1	3	0	2	4	1	5	0	3	0	2	0	1	1	4	4	1	4	3	2	48	3	4	4	6	4	0	0	1	0	5	0	7	1	1	5	1	2	0	1	6	2	3
# axenic cultures with assigned taxonomy	3	10	13	8	10	14	9	17	12	14	12	14	8	8	7	2	22	17	15	11	4	3	3	20	20	19	2	16	13	18	12	1	3	6	1	2	23	5	24	11	7	6	3	5	0	1	6	15	8
sum	3	10	13	8	10	14	9	18	12	14	12	15	8	9	7	2	22	17	15	13	5	3	3	20	20	19	2	16	13	18	12	1	3	6	1	2	23	5	24	11	7	6	3	5	0	1	6	15	8
Archaea/Halobacterota/Halobacteria_Halobacterales/Halococcaceae/Halococcus	0	0	0	0	0	0	0	0	0	0	0	0	0	0	0	0	0	0	0	0	0	0	0	0	0	1	0	2	0	0	0	0	0	0	0	0	0	1	0	0	0	0	0	0	0	0	0	0	0
Bacteria/Actinobacteriota/Acidimicrobiia/Microtrichales/uncultured	0	0	0	2	0	0	0	0	0	0	0	0	0	0	0	0	0	0	0	2	1	0	0	0	0	0	0	0	0	0	0	0	0	0	0	0	0	0	0	0	0	0	0	0	0	0	0	0	0
Bacteria/Actinobacteriota/Actinobacteria/Corynebacteriales/Corynebacteriaceae/Corynebacterium_1	0	0	0	0	0	0	0	0	0	0	0	0	0	0	0	0	0	0	0	0	0	0	0	0	0	0	0	0	0	0	0	0	0	0	0	0	0	0	0	0	0	0	1	0	0	0	0	0	0
Bacteria/Actinobacteriota/Actinobacteria/Corynebacteriales/Mycobacteriaceae/Mycobacterium	0	0	0	0	0	0	0	0	0	0	0	1	0	0	0	0	0	0	0	1	0	0	0	1	0	0	0	0	0	0	0	0	0	1	0	0	0	0	0	0	0	0	0	2	0	0	0	0	0
Bacteria/Actinobacteriota/Actinobacteria/Frankiales_1/uncultured	1	0	0	0	0	0	0	0	0	0	0	0	0	0	0	0	0	0	0	0	0	0	0	0	0	0	0	0	0	0	0	0	0	0	0	0	0	0	0	0	0	0	0	0	0	0	0	0	0
Bacteria/Actinobacteriota/Actinobacteria/Micrococcales_1/Micrococcaceae/Micrococcus_1	0	0	0	0	0	0	0	0	0	0	0	0	0	0	0	0	0	0	0	0	0	0	0	0	0	0	0	1	0	0	0	0	0	0	0	0	0	0	0	0	0	0	0	0	0	0	0	0	0
Bacteria/Actinobacteriota/Actinobacteria/Micrococcales_1/Micrococcaceae/Pseudarthrobacter	0	0	0	0	0	0	0	0	0	0	0	0	0	0	0	0	0	0	0	0	0	0	0	0	0	0	0	1	0	0	0	0	0	0	0	0	0	0	0	0	0	0	0	0	0	0	0	0	0
Bacteria/Actinobacteriota/Actinobacteria/Micrococcales_3/Microbacteriaceae	0	0	0	0	0	0	0	0	0	1	0	0	0	0	0	0	0	0	0	0	0	0	0	0	0	0	0	0	0	0	0	0	0	0	0	0	0	0	0	0	0	0	0	0	0	0	0	0	0
Bacteria/Actinobacteriota/Actinobacteria/Micrococcales_3/Microbacteriaceae/luna/Candidatus Aquiluna	0	0	0	0	0	0	0	0	0	2	0	0	0	0	0	0	0	0	0	0	0	0	0	0	0	0	0	0	0	0	0	0	0	0	0	0	0	0	0	0	0	0	0	0	0	0	0	0	0
Bacteria/Actinobacteriota/Actinobacteria/Micrococcales_3/Microbacteriaceae/luna/Candidatus Limnoluna	0	0	0	0	0	0	0	0	0	0	0	0	0	0	0	0	0	0	0	2	1	0	0	0	0	0	0	0	0	0	0	0	0	0	0	0	0	0	0	0	0	0	0	0	0	0	0	0	0
Bacteria/Actinobacteriota/Actinobacteria/Nanopelagicales/Candidatus Planktophila	0	0	0	0	1	2	0	0	1	0	0	0	0	0	1	0	0	0	0	0	0	0	0	0	2	0	0	0	0	1	0	0	0	0	0	0	0	1	0	0	0	0	1	0	0	0	0	1	1
Bacteria/Actinobacteriota/Actinobacteria/Propionibacteriales/Nocardioidaceae_1/Nocardioides_1	0	0	0	0	0	0	0	0	0	0	0	0	0	0	0	0	0	0	0	0	0	0	0	0	0	0	0	0	0	0	0	0	0	0	0	0	0	0	0	0	0	0	0	0	0	0	1	0	0
Bacteria/Actinobacteriota/Actinobacteria/Streptomycetales_Streptomycetaceae/Streptomyces_1	0	0	0	0	0	0	0	0	0	0	0	0	0	1	0	0	0	0	0	0	0	0	0	0	0	0	0	0	0	0	0	0	0	0	0	0	0	0	0	0	0	0	0	0	0	0	0	0	0
Bacteria/Armatimonadota/Fimbriimonadia_Fimbriimonadales/Fimbriimonadaceae	0	0	0	0	0	0	0	1	0	0	0	0	0	0	0	0	0	0	0	0	0	0	0	0	0	0	0	0	0	0	0	0	0	0	0	0	0	0	0	0	0	0	0	0	0	0	0	0	0
Bacteria/Bacteroidota/Bacteroidia/Chitinophagales/Chitinophagaceae/Asinibacterium	0	0	0	0	0	0	0	0	0	0	0	0	0	0	0	0	0	0	0	0	0	0	0	0	0	0	0	0	0	0	0	0	0	0	0	0	0	0	0	0	0	0	0	0	0	0	0	0	1
Bacteria/Bacteroidota/Bacteroidia/Chitinophagales/Chitinophagaceae/Heliimonas	0	0	0	0	0	0	0	0	0	0	0	0	0	0	0	0	0	0	0	0	0	0	0	0	0	0	0	0	0	0	0	0	0	0	0	0	0	0	0	0	0	0	0	0	0	0	0	0	1
Bacteria/Bacteroidota/Bacteroidia/Cytophagales_1/Spirosomaceae/Lacihabitans	0	0	0	0	0	0	0	0	0	0	0	0	0	0	0	0	0	0	0	0	0	0	0	0	0	1	0	0	0	0	0	0	0	0	0	0	0	0	0	0	0	0	0	0	0	0	0	0	0
Bacteria/Bacteroidota/Bacteroidia/Flavobacteriales/Flavobacteriaceae_1/Flavobacterium_1	0	0	10	0	0	0	0	1	0	0	0	4	0	1	0	0	1	0	0	0	0	0	0	0	0	0	0	1	0	0	1	0	0	2	1	0	0	0	1	1	0	0	0	0	0	0	0	0	0
Bacteria/Bacteroidota/Bacteroidia/Sphingobacteriales/env.OPS 17	0	0	0	0	0	0	0	0	0	0	0	0	0	0	0	0	0	0	0	0	0	0	0	0	0	0	0	0	0	0	0	0	0	0	0	0	0	0	0	0	0	0	0	0	0	0	0	0	0
Bacteria/Bacteroidota/Bacteroidia/Sphingobacteriales/NS11-12 marine group	0	0	0	0	0	0	0	0	0	0	0	0	0	0	0	0	0	0	0	0	0	0	0	0	0	0	0	1	0	0	0	0	0	0	0	0	0	0	0	0	0	0	0	0	0	0	0	0	0
Bacteria/Campilobacterota/Campylobacteria/Campylobacterales/Arcobacteraceae/Pseudarcobacter_2	0	0	0	0	0	0	0	0	0	0	0	0	0	0	0	0	0	0	0	0	0	0	0	0	0	0	0	0	0	0	0	0	0	0	0	0	0	0	0	0	0	0	0	0	0	0	0	0	0
Bacteria/Cyanobacteria/Cyanobacteriia/Synechococcales/Cyanobiaceae/Cyanobium PCC-6307	0	0	0	0	0	1	1	1	1	1	3	0	1	0	0	1	0	1	1	1	0	1	0	1	0	0	0	0	1	0	0	0	0	0	0	0	0	0	0	0	5	5	0	1	0	0	0	0	0
Bacteria/Proteobacteria/Alphaproteobacteria/Caulobacterales/Hyphomonadaceae/UKL13-1	0	0	0	0	0	0	0	0	0	0	0	0	0	0	0	0	0	0	0	0	0	0	0	0	0	1	0	0	0	0	0	0	0	0	0	0	0	0	0	0	0	0	0	0	0	0	0	0	0
Bacteria/Proteobacteria/Alphaproteobacteria/Caulobacterales_Caulobacteraceae/Brevundimonas_1	0	0	0	0	0	0	0	0	0	0	0	0	0	0	0	0	0	0	0	0	0	0	0	0	0	0	0	0	0	0	0	0	0	0	0	0	0	0	0	0	0	0	0	0	0	0	0	0	1
Bacteria/Proteobacteria/Alphaproteobacteria/Caulobacterales_Caulobacteraceae/Caulobacter_2	0	0	0	0	0	0	0	0	0	0	0	0	0	0	0	0	0	0	0	0	0	0	0	0	0	0	0	0	0	0	0	0	0	0	0	0	0	0	0	0	0	0	0	0	0	0	0	0	0
Bacteria/Proteobacteria/Alphaproteobacteria/Caulobacterales_Caulobacteraceae/Phenylobacterium	0	0	0	0	0	0	0	0	0	0	0	0	0	0	0	0	0	1	0	0	0	0	0	0	0	0	0	0	0	0	0	0	0	0	0	0	0	0	0	0	0	0	0	0	0	0	0	0	0
Bacteria/Proteobacteria/Alphaproteobacteria/Micropepsales_Micropepsaceae/uncultured	0	0	0	0	0	0	0	0	0	0	0	0	0	0	0	0	0	0	0	0	0	0	0	0	0	0	0	0	0	0	1	0	0	0	0	0	0	0	0	0	0	0	0	0	0	0	0	0	0
Bacteria/Proteobacteria/Alphaproteobacteria/Reyranellales_Reyranellaceae/Reyranella	0	0	0	0	0	0	0	0	0	0	0	0	0	0	0	0	0	0	0	0	0	0	0	0	0	0	0	0	0	0	0	1	0	0	0	0	0	0	0	0	0	0	0	0	0	0	0	0	0
Bacteria/Proteobacteria/Alphaproteobacteria/Rhizobiales_3/Rhizobiales Incertae Sedis/Phreatobacter	0	0	0	0	0	0	0	1	0	0	0	0	0	0	0	0	0	0	0	0	0	0	0	0	0	0	0	0	0	0	0	0	0	0	0	0	0	0	0	0	0	0	0	0	0	0	0	0	0
Bacteria/Proteobacteria/Alphaproteobacteria/Rhodobacterales_Rhodobacteraceae_1/Paracoccus_1	0	0	0	0	0	0	0	0	0	0	0	1	0	0	0	0	0	0	0	0	0	0	0	0	0	0	0	0	0	0	0	0	0	0	0	0	0	0	0	0	0	0	0	0	0	0	0	0	0
Bacteria/Proteobacteria/Alphaproteobacteria/Rhodobacterales_Rhodobacteraceae_1/Rhodobacter_1	0	0	0	0	0	0	0	0	0	0	0	0	0	0	0	0	0	0	0	0	0	0	0	0	1	0	0	0	0	0	0	0	0	0	0	0	0	0	0	0	0	0	0	0	0	0	0	0	0
Bacteria/Proteobacteria/Alphaproteobacteria/Rhodobacterales_Rhodobacteraceae_1/Tabrizicola	0	0	0	0	0	0	0	0	0	0	0	0	0	0	0	0	0	0	0	0	0	0	0	0	0	0	0	0	0	0	0	0	0	0	0	0	0	0	0	0	0	0	0	0	0	0	0	0	0
Bacteria/Proteobacteria/Alphaproteobacteria/Rhodobacterales_Rhodobacteraceae_1/uncultured	0	0	0	0	0	0	0	0	0	1	1	0	0	0	0	0	0	0	0	0	0	0	0	0	0	2	0	0	0	0	0	0	0	0	0	0	0	0	0	0	0	0	0	0	0	0	0	0	0
Bacteria/Proteobacteria/Alphaproteobacteria/SAR11 clade/Clade III - Fonsibacter	0	0	0	0	0	0	0	0	2	1	1	0	1	0	0	0	2	0	0	1	0	0	0	0	0	0	0	0	3	0	0	0	0	0	0	0	0	0	0	0	0	0	0	0	0	0	0	0	0
Bacteria/Proteobacteria/Alphaproteobacteria/Sphingomonadales_Sphingomonadaceae/Erythrobacter_1	0	0	0	0	0	0	0	0	0	0	0	0	0	0	0	0	0	0	0	0	0	0	0	0	0	0	0	0	0	0	0	0	0	0	0	0	0	0	0	0	0	0	0	0	0	0	0	0	0
Bacteria/Proteobacteria/Alphaproteobacteria/Sphingomonadales_Sphingomonadaceae/Novosphingobium_2	0	0	0	0	0	0	0	0	0	0	0	0	0	0	0	0	0	0	0	0	0	0	0	0	0	0	0	0	0	0	0	0	0	0	0	0	1	0	0	0	0	0	0	0	0	0	0	0	0
Bacteria/Proteobacteria/Alphaproteobacteria/Sphingomonadales_Sphingomonadaceae/Porphyrobacter_1	0	0	0	1	0	0	0	0	0	0	0	0	0	0	0	0	0	0	0	0	0	0	0	0	0	3	0	0	0	0	0	0	0	0	0	0	0	0	0	0	0	0	0	0	0	0	0	0	0
Bacteria/Proteobacteria/Alphaproteobacteria/Sphingomonadales_Sphingomonadaceae/Sandarakinorhabdus	0	0	0	0	0	0	0	0	0	2	0	0	0	0	0	0	0	0	0	1	0	0	0	0	0	0	0	0	0	0	0	0	0	0	0	0	0	0	0	0	0	0	0	0	0	0	0	0	0
Bacteria/Proteobacteria/Alphaproteobacteria/Sphingomonadales_Sphingomonadaceae/Sphingobium_1	0	0	0	0	0	0	0	0	0	0	0	0	0	0	0	0	0	1	0	0	0	0	0	0	0	0	0	0	0	0	0	0	0	0	0	0	0	0	0	0	0	0	0	0	0	0	0	0	0
Bacteria/Proteobacteria/Alphaproteobacteria/Sphingomonadales_Sphingomonadaceae/Sphingomonas_5	0	0	0	0	0	0	0	1	0	0	0	0	0	0	0	0	0	0	0	0	0	0	0	0	0	0	0	0	0	0	0	0	0	0	0	0	0	0	0	0	0	0	0	0	0	0	0	0	0
Bacteria/Proteobacteria/Alphaproteobacteria/Sphingomonadales_Sphingomonadaceae/Sphingorhabdus_1	0	0	0	0	0	0	0	1	0	0	0	0	0	0	1	0	1	0	0	0	0	0	0	0	0	1	0	1	0	0	1	0	0	0	0	1	0	0	0	0	0	0	0	0	0	0	0	0	1
Bacteria/Proteobacteria/Gammaproteobacteria/Aeromonadales/Aeromonadaceae_Aeromonas_1	0	0	0	0	0	0	0	0	0	0	0	0	0	0	0	0	0	0	0	0	0	0	0	0	0	0	0	0	0	0	0	0	0	0	0	0	0	0	1	0	0	0	0	0	0	0	0	0	0
Bacteria/Proteobacteria/Gammaproteobacteria/Alteromonadales_1/Alteromonadaceae/Rheinheimera	0	0	0	0	0	0	0	1	0	0	0	0	0	0	0	0	0	0	0	0	0	0	2	0	0	0	0	0	0	0	0	0	0	0	0	0	0	0	5	2	0	0	0	0	0	0	0	0	0
Bacteria/Proteobacteria/Gammaproteobacteria/Burkholderiales/Alcaligenaceae_1/GKS98 freshwater group	0	0	0	0	0	0	0	0	0	0	0	0	0	0	0	0	0	0	1	0	0	0	0	0	1	0	0	1	0	0	0	0	0	0	0	0	0	0	0	0	0	0	0	0	0	0	0	0	0
Bacteria/Proteobacteria/Gammaproteobacteria/Burkholderiales/Burkholderiaceae_2/Polynucleobacter	1	8	1	2	4	5	2	2	2	2	3	0	0	4	1	1	3	4	0	0	1	1	0	1	7	5	1	5	0	9	4	0	0	0	0	0	1	1	1	0	0	1	0	0	0	0	1	5	1
Bacteria/Proteobacteria/Gammaproteobacteria/Burkholderiales/Comamonadaceae	0	0	0	0	0	0	0	2	0	0	0	0	0	1	0	0	0	0	1	0	0	0	0	0	0	0	0	0	0	0	0	0	0	0	0	0	0	0	1	0	0	0	0	0	0	0	0	0	0
Bacteria/Proteobacteria/Gammaproteobacteria/Burkholderiales/Comamonadaceae/Aquabacterium	0	0	0	0	1	0	0	0	0	0	0	0	0	0	0	0	0	0	0	0	0	0	0	0	0	0	0	0	0	0	0	0	0	0	0	0	0	0	0	0	0	0	0	0	0	0	0	0	0
Bacteria/Proteobacteria/Gammaproteobacteria/Burkholderiales/Comamonadaceae/Hydrogenophaga_1	0	0	0	0	0	0	0	0	0	0	0	0	0	0	0	0	0	0	1	1	0	0	0	0	0	0	0	0	0	0	0	0	0	0	0	0	0	0	0	0	0	0	0	0	0	0	0	0	0
Bacteria/Proteobacteria/Gammaproteobacteria/Burkholderiales/Comamonadaceae/Inhella	0	0	0	0	0	0	0	1	0	0	0	0	0	0	0	0	0	0	0	0	0	0	1	0	0	0	0	0	0	0	0	0	0	0	0	0	0	0	0	0	0	0	0	0	0	0	0	0	0
Bacteria/Proteobacteria/Gammaproteobacteria/Burkholderiales/Comamonadaceae/Limnohabitans	1	0	2	0	3	4	1	2	3	1	0	8	0	0	0	0	11	8	0	1	1	0	0	13	3	2	0	2	3	6	1	0	0	0	0	0	0	1	0	3	0	0	0	0	0	0	0	3	2
Bacteria/Proteobacteria/Gammaproteobacteria/Burkholderiales/Comamonadaceae/Paucibacter	0	0	0	0	0	0	0	0	0	0	0	0	0	0	0	0	0	0	0	0	0	0	0	0	0	0	0	0	0	0	0	0	0	0	0	0	0	0	0	0	0	0	0	0	0	0	0	0	0
Bacteria/Proteobacteria/Gammaproteobacteria/Burkholderiales/Comamonadaceae/Polaromonas	0	1	0	0	0	0	0	0	0	0	0	0	0	1	0	0	0	0	0	0	0	0	0	0	0	0	0	0	0	0	0	0	0	0	0	0	0	0	0	0	0	0	0	0	0	0	0	0	0
Bacteria/Proteobacteria/Gammaproteobacteria/Burkholderiales/Comamonadaceae/Rhizobacter_1	0	0	0	0	0	0	0	0	0	0	1	0	0	0	0	0	0	0	0	0	0	0	0	0	0	0	0	0	0	0	0	0	0	0	0	0	0	0	0	0	0	0	0	0	0	0	0	0	0
Bacteria/Proteobacteria/Gammaproteobacteria/Burkholderiales/Comamonadaceae/Rhodoferax_1	0	0	0	0	0	0	0	0	0	0	0	0	0	0	0	0	0	0	0	0	0	0	0	0	0	0	0	0	0	0	0	0	0	0	0	0	0	0	0	0	0	0	0	0	0	0	0	0	0
Bacteria/Proteobacteria/Gammaproteobacteria/Burkholderiales/Comamonadaceae/Rhodoferax_2	0	0	0	1	0	0	3	0	0	0	0	0	0	0	0	0	0	0	0	0	0	0	0	0	1	0	0	0	0	0	0	0	0	0	0	0	1	1	0	0	0	0	0	0	0	0	0	2	0
Bacteria/Proteobacteria/Gammaproteobacteria/Burkholderiales/Comamonadaceae/uncultured	0	0	0	0	1	1	0	1	0	1	0	0	1	1	0	0	2	1	0	0	0	0	0	2	1	0	0	0	0	0	0	0	0	0	0	0	0	0	13	0	0	0	0	0	0	0	0	0	0
Bacteria/Proteobacteria/Gammaproteobacteria/Burkholderiales/Methylophilaceae/Candidatus Methylopumilus	0	0	0	1	0	0	0	0	1	0	1	0	4	0	4	0	0	1	1	0	1	0	0	2	1	3	0	0	1	0	1	0	2	1	0	0	2	0	1	4	2	0	0	0	0	1	4	3	0
Bacteria/Proteobacteria/Gammaproteobacteria/Burkholderiales/Methylophilaceae/Candidatus Methylosemipumilus	0	0	0	0	0	0	1	0	0	0	0	1	0	0	0	0	0	0	0	0	0	0	0	0	0	0	0	0	0	0	0	0	0	0	0	0	0	0	0	0	0	0	0	0	0	0	0	0	0
Bacteria/Proteobacteria/Gammaproteobacteria/Burkholderiales/Methylophilaceae/Methylotenera_1	0	1	0	0	0	0	0	2	0	1	1	0	0	0	0	0	0	0	0	0	0	0	0	0	3	0	0	0	5	2	3	0	0	0	0	1	18	0	0	0	0	0	0	2	0	0	0	1	0
Bacteria/Proteobacteria/Gammaproteobacteria/Burkholderiales/Methylophilaceae/uncultured	0	0	0	0	0	0	0	0	0	0	0	0	0	0	0	0	0	0	0	0	0	0	0	0	0	0	0	0	0	0	0	0	0	0	0	0	0	0	0	0	0	0	0	0	0	0	0	0	0
Bacteria/Proteobacteria/Gammaproteobacteria/Burkholderiales/MWH-UniP1 aquatic group	0	0	0	0	0	1	0	0	2	0	1	0	0	0	0	0	2	0	10	3	0	0	0	0	0	0	0	0	0	0	0	0	1	0	0	0	0	0	0	0	0	0	0	0	0	0	0	0	0
Bacteria/Proteobacteria/Gammaproteobacteria/Burkholderiales/Oxalobacteraceae/Duganella_2	0	0	0	0	0	0	0	0	0	0	0	0	0	0	0	0	0	0	0	0	0	1	0	0	0	0	0	0	0	0	0	0	0	0	0	0	0	0	0	0	0	0	0	0	0	0	0	0	0
Bacteria/Proteobacteria/Gammaproteobacteria/Burkholderiales/Oxalobacteraceae/Duganella_3	0	0	0	0	0	0	0	0	0	0	0	0	0	0	0	0	0	0	0	0	0	0	0	0	0	0	1	0	0	0	0	0	0	0	0	0	0	0	0	0	0	0	0	0	0	0	0	0	0
Bacteria/Proteobacteria/Gammaproteobacteria/Burkholderiales/Oxalobacteraceae/Massilia_1	0	0	0	0	0	0	0	0	0	0	0	0	0	0	0	0	0	0	0	0	0	0	0	0	0	0	0	0	0	0	0	0	0	1	0	0	0	0	0	0	0	0	1	0	0	0	0	0	0
Bacteria/Proteobacteria/Gammaproteobacteria/Burkholderiales/Oxalobacteraceae/Noviherbaspirillum_3	0	0	0	0	0	0	0	1	0	0	0	0	1	0	0	0	0	0	0	0	0	0	0	0	0	0	0	0	0	0	0	0	0	0	0	0	0	0	0	0	0	0	0	0	0	0	0	0	0
Bacteria/Proteobacteria/Gammaproteobacteria/Burkholderiales/Oxalobacteraceae/Rugamonas	0	0	0	0	0	0	0	0	0	0	0	0	0	0	0	0	0	0	0	0	0	0	0	0	0	0	0	0	0	0	0	0	0	0	0	0	0	0	0	0	0	0	0	0	0	0	0	0	0
Bacteria/Proteobacteria/Gammaproteobacteria/Burkholderiales/Oxalobacteraceae/uncultured	0	0	0	1	0	0	1	0	0	0	0	0	0	0	0	0	0	0	0	0	0	0	0	0	0	0	0	1	0	0	0	0	0	0	0	0	0	0	0	0	0	0	0	0	0	0	0	0	0
Bacteria/Proteobacteria/Gammaproteobacteria/Burkholderiales/Oxalobacteraceae/Undibacterium	0	0	0	0	0	0	0	0	0	0	0	0	0	0	0	0	0	0	0	0	0	0	0	0	0	0	0	0	0	0	0	0	0	0	0	0	0	0	0	0	0	0	0	0	0	0	0	0	0
Bacteria/Proteobacteria/Gammaproteobacteria/Burkholderiales/Rhodocyclaceae_2/uncultured	0	0	0	0	0	0	0	0	0	1	0	0	0	0	0	0	0	0	0	0	0	0	0	0	0	0	0	0	0	0	0	0	0	0	0	0	0	0	0	0	0	0	0	0	0	0	0	0	0
Bacteria/Proteobacteria/Gammaproteobacteria/Pseudomonadales_Moraxellaceae/Acinetobacter	0	0	0	0	0	0	0	0	0	0	0	0	0	0	0	0	0	0	0	0	0	0	0	0	0	0	0	0	0	0	0	0	0	0	0	0	0	0	1	1	0	0	0	0	0	0	0	0	0
Bacteria/Proteobacteria/Gammaproteobacteria/Pseudomonadales_Moraxellaceae/Alkanindiges	0	0	0	0	0	0	0	0	0	0	0	0	0	0	0	0	0	0	0	0	0	0	0	0	0	0	0	0	0	0	0	0	0	1	0	0	0	0	0	0	0	0	0	0	0	0	0	0	0
Bacteria/Verrucomicrobiota/Verrucomicrobiae/Methylacidiphilales_Methylacidiphilaceae/uncultured	0	0	0	0	0	0	0	0	0	0	0	0	0	0	0	0	0	0	0	0	0	0	0	0	0	0	0	0	0	0	0	0	0	0	0	0	0	0	0	0	0	0	0	0	0	0	0	0	0
[truncated: 25 more columns]

## Sheet: 4-stats
Supplementary Data 4: Results of statistical tests applied in this study. Significant p-values are highlighed in bold.
Fig. 2a: Test for significant differences in viability between different water layers (epi- vs. hypolimnion), seasons (spring, summer autumn), and cultivation media used for dilution-to-extinction isolation. Raw data can be found in Supplementary Data 3.
Viability				Viability				Viability				Viability				Viability				Viability				Viability
t-Test: Two-Sample Assuming Unequal Variances				t-Test: Two-Sample Assuming Unequal Variances				t-Test: Two-Sample Assuming Unequal Variances				t-Test: Two-Sample Assuming Unequal Variances				t-Test: Two-Sample Assuming Equal Variances				t-Test: Two-Sample Assuming Equal Variances				t-Test: Two-Sample Assuming Equal Variances
	epilimnion	hypolimnion			spring	summer			spring	autumn			summer	autumn			med2	med3			med2	MM-med			med3	MM-med
Mean	13.6396	11.7181		Mean	8.16135	19.2944		Mean	8.16135	14.8564		Mean	19.2944	14.8564		Mean	14.5727	11.1521		Mean	14.5727	14.0517		Mean	11.1521	14.0517
Variance	59.8332	92.2039		Variance	26.9966	26.2302		Variance	26.9966	100.022		Variance	26.2302	100.022		Variance	219.384	223.366		Variance	219.384	158.715		Variance	223.366	158.715
Observations	31	30		Observations	25	8		Observations	25	28		Observations	8	28		Observations	60	60		Observations	60	61		Observations	60	61
Hypothesized Mean Difference	0			Hypothesized Mean Difference	0			Hypothesized Mean Difference	0			Hypothesized Mean Difference	0			Pooled Variance	221.375			Pooled Variance	188.795			Pooled Variance	190.769
df	56			df	12			df	42			df	23			Hypothesized Mean Difference	0			Hypothesized Mean Difference	0			Hypothesized Mean Difference	0
t Stat	0.859002			t Stat	-5.33259			t Stat	-3.10408			t Stat	1.69554			df	118			df	119			df	119
P(T<=t) one-tail	0.197001			P(T<=t) one-tail	8.92977e-05			P(T<=t) one-tail	0.00170532			P(T<=t) one-tail	0.0517354			t Stat	1.2592			t Stat	0.208517			t Stat	-1.15461
t Critical one-tail	1.67252			t Critical one-tail	1.78229			t Critical one-tail	1.68195			t Critical one-tail	1.71387			P(T<=t) one-tail	0.105222			P(T<=t) one-tail	0.417591			P(T<=t) one-tail	0.125282
P(T<=t) two-tail	0.394002			P(T<=t) two-tail	0.000178595			P(T<=t) two-tail	0.00341064			P(T<=t) two-tail	0.103471			t Critical one-tail	1.65787			t Critical one-tail	1.65776			t Critical one-tail	1.65776
t Critical two-tail	2.00324			t Critical two-tail	2.17881			t Critical two-tail	2.01808			t Critical two-tail	2.06866			P(T<=t) two-tail	0.210444			P(T<=t) two-tail	0.835182			P(T<=t) two-tail	0.250564
																t Critical two-tail	1.98027			t Critical two-tail	1.9801			t Critical two-tail	1.9801
Fig. 2b: Test for significant differences in growth rates and maximum cell yield between oligo-, meso- and copiotrophic strains. Raw data can be found in Supplementary Data 5.
max. growth rates				max. growth rates				max. growth rates
t-Test: Two-Sample Assuming Equal Variances				t-Test: Two-Sample Assuming Equal Variances				t-Test: Two-Sample Assuming Equal Variances
	oligotrophs	mesotrophs			oligotrophs	copiotrophs			mesotrophs	copiotrophs
Mean	0.536295	1.41607		Mean	0.536295	2.83879		Mean	1.41607	2.83879
Variance	0.0484148	0.189187		Variance	0.0484148	1.39032		Variance	0.189187	1.39032
Observations	33	36		Observations	33	36		Observations	36	36
Pooled Variance	0.121952			Pooled Variance	0.749408			Pooled Variance	0.789751
Hypothesized Mean Difference	0			Hypothesized Mean Difference	0			Hypothesized Mean Difference	0
df	67			df	67			df	70
t Stat	-10.4535			t Stat	-11.0363			t Stat	-6.79221
P(T<=t) one-tail	5.15763e-16			P(T<=t) one-tail	5.07559e-17			P(T<=t) one-tail	1.49072e-09
t Critical one-tail	1.66792			t Critical one-tail	1.66792			t Critical one-tail	1.66691
P(T<=t) two-tail	1.03153e-15			P(T<=t) two-tail	1.01512e-16			P(T<=t) two-tail	2.98144e-09
t Critical two-tail	1.99601			t Critical two-tail	1.99601			t Critical two-tail	1.99444
log(10) transformed max. abundances				log(10) transformed max. abundances				log(10) transformed max. abundances
t-Test: Two-Sample Assuming Equal Variances				t-Test: Two-Sample Assuming Equal Variances				t-Test: Two-Sample Assuming Equal Variances
	oligotrophs	mesotrophs			oligotrophs	copiotrophs			mesotrophs	copiotrophs
Mean	6.42933	7.13494		Mean	6.42933	7.34921		Mean	7.13494	7.34921
Variance	0.55406	0.256452		Variance	0.55406	1.13212		Variance	0.256452	1.13212
Observations	33	35		Observations	33	36		Observations	35	36
Pooled Variance	0.400747			Pooled Variance	0.856031			Pooled Variance	0.700631
Hypothesized Mean Difference	0			Hypothesized Mean Difference	0			Hypothesized Mean Difference	0
df	66			df	67			df	69
t Stat	-4.59378			t Stat	-4.12547			t Stat	-1.07838
P(T<=t) one-tail	1.00715e-05			P(T<=t) one-tail	5.22049e-05			P(T<=t) one-tail	0.142309
t Critical one-tail	1.66827			t Critical one-tail	1.66792			t Critical one-tail	1.66724
P(T<=t) two-tail	2.01431e-05			P(T<=t) two-tail	0.00010441			P(T<=t) two-tail	0.284619
t Critical two-tail	1.99656			t Critical two-tail	1.99601			t Critical two-tail	1.99495
Oligotrophs - max. growth rates								Mesotrophs - max. growth rates								Copiotrophs - max. growth rates
Anova: Single Factor								Anova: Single Factor								Anova: Single Factor
SUMMARY								SUMMARY								SUMMARY
Groups	Count	Sum	Average	Variance				Groups	Count	Sum	Average	Variance				Groups	Count	Sum	Average	Variance
1-med2	6	2.90521	0.484202	0.0532544				1-med2	6	7.40308	1.23385	0.0292489				1-med2	6	16.1506	2.69177	1.29719
2-med3	6	3.08753	0.514589	0.047768				2-med3	6	7.14145	1.19024	0.0218573				2-med3	6	16.8819	2.81365	1.64756
3-10xmed2	6	2.69726	0.449543	0.0404655				3-10xmed2	6	8.12671	1.35445	0.0780039				3-10xmed2	6	15.9321	2.65536	1.20256
4-10xmed3	6	3.30883	0.551472	0.0542536				4-10xmed3	6	7.95773	1.32629	0.0456399				4-10xmed3	6	16.4432	2.74053	1.13243
5-med4	4	2.38739	0.596847	0.0784769				5-med4	5	8.05973	1.61195	0.113707				5-med4	6	17.8895	2.98159	2.07749
6-10xmed4	5	3.31151	0.662302	0.0438582				6-10xmed4	6	12.0718	2.01197	0.19174				6-10xmed4	6	18.8991	3.14985	2.15575
ANOVA								ANOVA								ANOVA
Source of Variation	SS	df	MS	F	P-value	F crit		Source of Variation	SS	df	MS	F	P-value	F crit		Source of Variation	SS	df	MS	F	P-value	F crit
Between Groups	0.159701	5	0.0319402	0.620613	0.685235	2.57189		Between Groups	2.85777	5	0.571555	7.24663	0.000164901	2.54539		Between Groups	1.0962	5	0.21924	0.138279	0.982021	2.53355
Within Groups	1.38957	27	0.0514656					Within Groups	2.28728	29	0.0788718					Within Groups	47.5649	30	1.5855
Total	1.54927	32						Total	5.14505	34						Total	48.6611	35
Oligotrophs - log(10) transformed max. abundances								Mesotrophs - log(10) transformed max. abundances								Copiotrophs - log(10) transformed max. abundances								Mesotrophs - log(10) transformed max. abundances
Anova: Single Factor								Anova: Single Factor								Anova: Single Factor								Pairwise t-tests
SUMMARY								SUMMARY								SUMMARY								P-values	1-med2	2-med3	3-10xmed2	4-10xmed3	5-med4	6-10xmed4
Groups	Count	Sum	Average	Variance				Groups	Count	Sum	Average	Variance				Groups	Count	Sum	Average	Variance				1-med2
1-med2	6	36.4912	6.08187	0.361177				1-med2	6	40.918	6.81966	0.0489503				1-med2	6	41.0423	6.84039	0.679133				2-med3	0.711364
2-med3	6	36.6764	6.11274	0.432903				2-med3	6	40.5892	6.76487	0.0753299				2-med3	6	43.6053	7.26754	1.15161				3-10xmed2	0.228828	0.163784
3-10xmed2	6	38.2301	6.37169	0.905379				3-10xmed2	6	42.119	7.01984	0.0973816				3-10xmed2	6	42.3216	7.05361	1.09508				4-10xmed3	0.338455	0.239688	0.804056
4-10xmed3	6	39.9503	6.65839	0.339709				4-10xmed3	6	41.8466	6.97443	0.0932514				4-10xmed3	6	43.2614	7.21024	1.22575				5-med4	0.013845	0.0127103	0.130891	0.0889389
5-med4	4	24.3559	6.08897	0.475188				5-med4	5	36.777	7.35539	0.128427				5-med4	6	44.2671	7.37785	0.904778				6-10xmed4	0.000438066	0.0127103	0.00312598	0.00217923	0.0586539
6-10xmed4	5	36.4638	7.29277	0.0642615				6-10xmed4	6	47.4733	7.91221	0.222188				6-10xmed4	6	50.074	8.34566	1.22928
ANOVA								ANOVA								ANOVA
Source of Variation	SS	df	MS	F	P-value	F crit		Source of Variation	SS	df	MS	F	P-value	F crit		Source of Variation	SS	df	MS	F	P-value	F crit
Between Groups	5.85148	5	1.1703	2.66011	0.0442977	2.57189		Between Groups	5.52014	5	1.10403	10.0077	1.21493e-05	2.54539		Between Groups	8.19598	5	1.6392	1.56471	0.200192	2.53355
Within Groups	11.8784	27	0.439943					Within Groups	3.19921	29	0.110318					Within Groups	31.4282	30	1.04761
Total	17.7299	32						Total	8.71935	34						Total	39.6242	35
Fig. 3c: Test for significant differences between epi- and hypolimnion samples in the contribution of cultures to the total number (diversity) and summed up read counts (abundance) of genera present in the sampled lakes (original lakes) and 462 publicly available metagenomes from 7 continents.
Original lakes - diversity				Original lakes - abundance				Global lakes - diversity				Global lakes - abundance
t-Test: Two-Sample Assuming Unequal Variances				t-Test: Two-Sample Assuming Unequal Variances				t-Test: Two-Sample Assuming Unequal Variances				t-Test: Two-Sample Assuming Unequal Variances
	epilimnion	hypolimnion			epilimnion	hypolimnion			epilimnion	hypolimnion			epilimnion	hypolimnion
Mean	17.4611	10.3598		Mean	49.0779	26.4706		Mean	20.5664	10.4966		Mean	37.4551	20.1463
Variance	41.6791	9.86241		Variance	102.852	130.205		Variance	62.889	24.7131		Variance	272.798	138.921
Observations	34	33		Observations	34	33		Observations	373	91		Observations	373	91
Hypothesized Mean Difference	0			Hypothesized Mean Difference	0			Hypothesized Mean Difference	0			Hypothesized Mean Difference	0
df	48			df	64			df	216			df	187
t Stat	5.75095			t Stat	8.56273			t Stat	15.1778			t Stat	11.5189
P(T<=t) one-tail	3.00337e-07			P(T<=t) one-tail	1.64837e-12			P(T<=t) one-tail	3.38478e-36			P(T<=t) one-tail	7.54858e-24
t Critical one-tail	1.67722			t Critical one-tail	1.66901			t Critical one-tail	1.65194			t Critical one-tail	1.65304
P(T<=t) two-tail	6.00674e-07			P(T<=t) two-tail	3.29675e-12			P(T<=t) two-tail	6.76957e-36			P(T<=t) two-tail	1.50972e-23
t Critical two-tail	2.01063			t Critical two-tail	1.99773			t Critical two-tail	1.97101			t Critical two-tail	1.97273
Supplementary Fig. 8: Comparison of methods for taxonomic assessment of metagenomic reads via SingleM (59 marker genes) and copy number corrected SILVA classification of 16S rRNA genes.
Nonlinear Regression
Equation: Polynomial; Linear
f=y0+a*x
R	Rsqr	Adj Rsqr	Standard Error of Estimate
0.9862	0.9725	0.9725	1.8406
	Coefficient	Std. Error	t	P	VIF
y0	-0.328	0.0656	-5.0007	<0.0001	1.3613
a	1.0525	0.0054	194.668	<0.0001	1.3613
Analysis of Variance:
Uncorrected for the mean of the observations:
	DF	SS	MS
Regression	2	170263	85131.6
Residual	1070	3625.08	3.3879
Total	1072	173888	162.209
Corrected for the mean of the observations:
	DF	SS	MS	F	P
Regression	1	128388	128388	37895.8	<0.0001
Residual	1070	3625.08	3.3879
Total	1071	132013	123.262
Statistical Tests:
PRESS		3653.36
Durbin-Watson Statistic		1.7027	Failed
Normality Test		Passed	(P = <0.0001)
K-S Statistic = 0.2114		Significance Level = <0.0001
Constant Variance Test		Passed	(P = <0.0001)
Power of performed test with alpha = <0.0001: 0.0000
Supplementary Fig. 12: Test for significant differences in the contribution of cultures to the total number (diversity) and summed up read counts (abundance) of genera present in metagenomes of different continents. Shown are pairwise t-tests between different continents.
Diversity				Diversity				Diversity				Diversity				Diversity				Diversity				Diversity				Diversity				Diversity				Diversity				Diversity				Diversity				Diversity
t-Test: Two-Sample Assuming Unequal Variances				t-Test: Two-Sample Assuming Unequal Variances				t-Test: Two-Sample Assuming Unequal Variances				t-Test: Two-Sample Assuming Unequal Variances				t-Test: Two-Sample Assuming Unequal Variances				t-Test: Two-Sample Assuming Unequal Variances				t-Test: Two-Sample Assuming Unequal Variances				t-Test: Two-Sample Assuming Unequal Variances				t-Test: Two-Sample Assuming Unequal Variances				t-Test: Two-Sample Assuming Unequal Variances				t-Test: Two-Sample Assuming Unequal Variances				t-Test: Two-Sample Assuming Unequal Variances				t-Test: Two-Sample Assuming Unequal Variances
	Africa	Antarctica			Africa	Asia			Africa	Australia			Africa	Europe			Africa	North America			Africa	South America			Antarctica	Asia			Antarctica	Australia			Antarctica	Europe			Antarctica	North America			Antarctica	South America			Asia	Australia			Asia
Mean	8.17735	21.0706		Mean	8.17735	18.1427		Mean	8.17735	18.3246		Mean	8.17735	17.2522		Mean	8.17735	22.2566		Mean	8.17735	15.4459		Mean	21.0706	18.1427		Mean	21.0706	18.3246		Mean	21.0706	17.2522		Mean	21.0706	22.2566		Mean	21.0706	15.4459		Mean	18.1427	18.3246		Mean	18.1427
Variance	31.8179	143.145		Variance	31.8179	28.9294		Variance	31.8179	9.98623		Variance	31.8179	33.8269		Variance	31.8179	84.9219		Variance	31.8179	0.0556498		Variance	143.145	28.9294		Variance	143.145	9.98623		Variance	143.145	33.8269		Variance	143.145	84.9219		Variance	143.145	0.0556498		Variance	28.9294	9.98623		Variance	28.9294
Observations	44	12		Observations	44	56		Observations	44	9		Observations	44	156		Observations	44	184		Observations	44	3		Observations	12	56		Observations	12	9		Observations	12	156		Observations	12	184		Observations	12	3		Observations	56	9		Observations	56
Hypothesized Mean Difference	0			Hypothesized Mean Difference	0			Hypothesized Mean Difference	0			Hypothesized Mean Difference	0			Hypothesized Mean Difference	0			Hypothesized Mean Difference	0			Hypothesized Mean Difference	0			Hypothesized Mean Difference	0			Hypothesized Mean Difference	0			Hypothesized Mean Difference	0			Hypothesized Mean Difference	0			Hypothesized Mean Difference	0			Hypothesized Mean Difference	0
df	12			df	90			df	20			df	71			df	105			df	45			df	12			df	13			df	11			df	12			df	11			df	17			df	104
t Stat	-3.62482			t Stat	-8.95008			t Stat	-7.49549			t Stat	-9.36009			t Stat	-12.9355			t Stat	-8.43986			t Stat	0.829979			t Stat	0.760501			t Stat	1.09568			t Stat	-0.336926			t Stat	1.62732			t Stat	-0.142667			t Stat	1.0398
P(T<=t) one-tail	0.00174181			P(T<=t) one-tail	2.18637e-14			P(T<=t) one-tail	1.57058e-07			P(T<=t) one-tail	2.54542e-14			P(T<=t) one-tail	9.17849e-24			P(T<=t) one-tail	3.98175e-11			P(T<=t) one-tail	0.211378			P(T<=t) one-tail	0.230263			P(T<=t) one-tail	0.148315			P(T<=t) one-tail	0.370996			P(T<=t) one-tail	0.0659739			P(T<=t) one-tail	0.444115			P(T<=t) one-tail	0.150422
t Critical one-tail	1.78229			t Critical one-tail	1.66196			t Critical one-tail	1.72472			t Critical one-tail	1.6666			t Critical one-tail	1.6595			t Critical one-tail	1.67943			t Critical one-tail	1.78229			t Critical one-tail	1.77093			t Critical one-tail	1.79588			t Critical one-tail	1.78229			t Critical one-tail	1.79588			t Critical one-tail	1.73961			t Critical one-tail	1.65964
P(T<=t) two-tail	0.00348361			P(T<=t) two-tail	4.37275e-14			P(T<=t) two-tail	3.14116e-07			P(T<=t) two-tail	5.09083e-14			P(T<=t) two-tail	1.8357e-23			P(T<=t) two-tail	7.9635e-11			P(T<=t) two-tail	0.422755			P(T<=t) two-tail	0.460527			P(T<=t) two-tail	0.296629			P(T<=t) two-tail	0.741992			P(T<=t) two-tail	0.131948			P(T<=t) two-tail	0.88823			P(T<=t) two-tail	0.300845
t Critical two-tail	2.17881			t Critical two-tail	1.98667			t Critical two-tail	2.08596			t Critical two-tail	1.99394			t Critical two-tail	1.98282			t Critical two-tail	2.0141			t Critical two-tail	2.17881			t Critical two-tail	2.16037			t Critical two-tail	2.20099			t Critical two-tail	2.17881			t Critical two-tail	2.20099			t Critical two-tail	2.10982			t Critical two-tail	1.98304
Abundance				Abundance				Abundance				Abundance				Abundance				Abundance				Abundance				Abundance				Abundance				Abundance				Abundance				Abundance				Abundance
t-Test: Two-Sample Assuming Unequal Variances				t-Test: Two-Sample Assuming Unequal Variances				t-Test: Two-Sample Assuming Unequal Variances				t-Test: Two-Sample Assuming Unequal Variances				t-Test: Two-Sample Assuming Unequal Variances				t-Test: Two-Sample Assuming Unequal Variances				t-Test: Two-Sample Assuming Unequal Variances				t-Test: Two-Sample Assuming Unequal Variances				t-Test: Two-Sample Assuming Unequal Variances				t-Test: Two-Sample Assuming Unequal Variances				t-Test: Two-Sample Assuming Unequal Variances				t-Test: Two-Sample Assuming Unequal Variances				t-Test: Two-Sample Assuming Unequal Variances
	Africa	Antarctica			Africa	Asia			Africa	Australia			Africa	Europe			Africa	North America			Africa	South America			Antarctica	Asia			Antarctica	Australia			Antarctica	Europe			Antarctica	North America			Antarctica	South America			Asia	Australia			Asia
Mean	17.3311	35.3267		Mean	17.3311	25.6886		Mean	17.3311	17.99		Mean	17.3311	38.5429		Mean	17.3311	37.5716		Mean	17.3311	30.4167		Mean	35.3267	25.6886		Mean	35.3267	17.99		Mean	35.3267	38.5429		Mean	35.3267	37.5716		Mean	35.3267	30.4167		Mean	25.6886	17.99		Mean	25.6886
Variance	229.641	449.669		Variance	229.641	161.979		Variance	229.641	24.2888		Variance	229.641	200.38		Variance	229.641	310.403		Variance	229.641	44.0452		Variance	449.669	161.979		Variance	449.669	24.2888		Variance	449.669	200.38		Variance	449.669	310.403		Variance	449.669	44.0452		Variance	161.979	24.2888		Variance	161.979
Observations	44	12		Observations	44	56		Observations	44	9		Observations	44	156		Observations	44	184		Observations	44	3		Observations	12	56		Observations	12	9		Observations	12	156		Observations	12	184		Observations	12	3		Observations	56	9		Observations	56
Hypothesized Mean Difference	0			Hypothesized Mean Difference	0			Hypothesized Mean Difference	0			Hypothesized Mean Difference	0			Hypothesized Mean Difference	0			Hypothesized Mean Difference	0			Hypothesized Mean Difference	0			Hypothesized Mean Difference	0			Hypothesized Mean Difference	0			Hypothesized Mean Difference	0			Hypothesized Mean Difference	0			Hypothesized Mean Difference	0			Hypothesized Mean Difference	0
df	14			df	84			df	41			df	66			df	73			df	4			df	13			df	13			df	12			df	12			df	12			df	29			df	107
t Stat	-2.75419			t Stat	-2.9344			t Stat	-0.234148			t Stat	-8.31765			t Stat	-7.702			t Stat	-2.93329			t Stat	1.51701			t Stat	2.73532			t Stat	-0.51663			t Stat	-0.358741			t Stat	0.679888			t Stat	3.25579			t Stat	-6.28956
P(T<=t) one-tail	0.0077584			P(T<=t) one-tail	0.00215408			P(T<=t) one-tail	0.408018			P(T<=t) one-tail	3.57719e-12			P(T<=t) one-tail	2.55247e-11			P(T<=t) one-tail	0.0213367			P(T<=t) one-tail	0.0765995			P(T<=t) one-tail	0.00850404			P(T<=t) one-tail	0.307401			P(T<=t) one-tail	0.363011			P(T<=t) one-tail	0.25474			P(T<=t) one-tail	0.00143825			P(T<=t) one-tail	3.54681e-09
t Critical one-tail	1.76131			t Critical one-tail	1.6632			t Critical one-tail	1.68288			t Critical one-tail	1.66827			t Critical one-tail	1.666			t Critical one-tail	2.13185			t Critical one-tail	1.77093			t Critical one-tail	1.77093			t Critical one-tail	1.78229			t Critical one-tail	1.78229			t Critical one-tail	1.78229			t Critical one-tail	1.69913			t Critical one-tail	1.65922
P(T<=t) two-tail	0.0155168			P(T<=t) two-tail	0.00430815			P(T<=t) two-tail	0.816035			P(T<=t) two-tail	7.15438e-12			P(T<=t) two-tail	5.10494e-11			P(T<=t) two-tail	0.0426734			P(T<=t) two-tail	0.153199			P(T<=t) two-tail	0.0170081			P(T<=t) two-tail	0.614802			P(T<=t) two-tail	0.726021			P(T<=t) two-tail	0.509479			P(T<=t) two-tail	0.00287649			P(T<=t) two-tail	7.09363e-09
t Critical two-tail	2.14479			t Critical two-tail	1.98861			t Critical two-tail	2.01954			t Critical two-tail	1.99656			t Critical two-tail	1.993			t Critical two-tail	2.77645			t Critical two-tail	2.16037			t Critical two-tail	2.16037			t Critical two-tail	2.17881			t Critical two-tail	2.17881			t Critical two-tail	2.17881			t Critical two-tail	2.04523			t Critical two-tail	1.98238
Supplementary Fig. 18: Regressions between genome size and various genomic features, metabolic pathways and abundances in natural samples
Genome size (Mbp) vs. GC content (%)							Genome size (Mbp) vs. coding density (%)							Genome size (Mbp) vs. intergenic spacer (bp)							Genome size (Mbp) vs. # tRNAs							Genome size (Mbp) vs. Proteome clustering coefficient (PCC50 %)							Genome size (Mbp) vs. Proteome clustering coefficient (PCC90 %)							Genome size (Mbp) vs. # sigma factors
Nonlinear Regression							Nonlinear Regression - Dynamic Fitting							Nonlinear Regression							Nonlinear Regression							Nonlinear Regression							Nonlinear Regression							Nonlinear Regression
Equation: Polynomial; Linear							Equation: Polynomial; Linear							Equation: Polynomial; Linear							Equation: Polynomial; Linear							Equation: Polynomial; Linear							Equation: Polynomial; Linear							Equation: Polynomial; Linear
f=y0+a*x							f=y0+a*x							f=y0+a*x							f=y0+a*x							f=y0+a*x							f=y0+a*x							f=y0+a*x
R	Rsqr	Adj Rsqr	Standard Error of Estimate				R	Rsqr	Adj Rsqr	Standard Error of Estimate				R	Rsqr	Adj Rsqr	Standard Error of Estimate				R	Rsqr	Adj Rsqr	Standard Error of Estimate				R	Rsqr	Adj Rsqr	Standard Error of Estimate				R	Rsqr	Adj Rsqr	Standard Error of Estimate				R	Rsqr	Adj Rsqr	Standard Error of Estimate
0.6411	0.411	0.4041	7.8754				0.7561	0.5718	0.5667	1.4511				0.7797	0.6079	0.6033	16.295				0.7232	0.5231	0.5175	3.7944				0.8763	0.7679	0.7652	0.6541				0.633	0.4007	0.3937	0.3864				0.7938	0.6301	0.6257	2.4
	Coefficient	Std. Error	t	P	VIF			Coefficient	Std. Error	t	P	VIF			Coefficient	Std. Error	t	P	VIF			Coefficient	Std. Error	t	P	VIF			Coefficient	Std. Error	t	P	VIF			Coefficient	Std. Error	t	P	VIF			Coefficient	Std. Error	t	P	VIF
y0	33.8048	1.9361	17.4598	<0.0001	5.2584<		y0	97.2036	0.3568	272.469	<0.0001	5.2584<		y0	21.5742	4.0061	5.3853	<0.0001	5.2584<		y0	32.1361	0.9328	34.4497	<0.0001	5.2584<		y0	-0.9126	0.1608	-5.6752	<0.0001	5.2584<		y0	-0.2049	0.095	-2.1574	0.0338	5.2584<		y0	0.3816	0.59	0.6468	0.5195	5.2584<
a	6.1414e-06	7.9747e-07	7.7012	<0.0001	5.2584<		a	-1.5653e-06	1.4694e-07	-10.6529	<0.0001	5.2584<		a	1.8941e-05	1.6501e-06	11.4792	<0.0001	5.2584<		a	3.7097e-06	3.8422e-07	9.6552	<0.0001	5.2584<		a	1.1107e-06	6.6231e-08	16.7695	<0.0001	5.2584<		a	2.9496e-07	3.9125e-08	7.5391	<0.0001	5.2584<		a	2.924e-06	2.4302e-07	12.0318	<0.0001	5.2584<
Analysis of Variance:							Analysis of Variance:							Analysis of Variance:							Analysis of Variance:							Analysis of Variance:							Analysis of Variance:							Analysis of Variance:
Uncorrected for the mean of the observations:							Uncorrected for the mean of the observations:							Uncorrected for the mean of the observations:							Uncorrected for the mean of the observations:							Uncorrected for the mean of the observations:							Uncorrected for the mean of the observations:							Uncorrected for the mean of the observations:
	DF	SS	MS					DF	SS	MS					DF	SS	MS					DF	SS	MS					DF	SS	MS					DF	SS	MS					DF	SS	MS
Regression	2	197689	98844.4				Regression	2	765435	382717				Regression	2	379836	189918				Regression	2	142227	71113.6				Regression	2	319.733	159.867				Regression	2	25.2918	12.6459				Regression	2	4821.41	2410.71
Residual	85	5271.8	62.0212				Residual	85	178.983	2.1057				Residual	85	22569.9	265.528				Residual	85	1223.77	14.3973				Residual	85	36.3624	0.4278				Residual	85	12.6893	0.1493				Residual	85	489.587	5.7599
Total	87	202961	2332.88				Total	87	765614	8800.16				Total	87	402406	4625.35				Total	87	143451	1648.86				Total	87	356.096	4.0931				Total	87	37.981	0.4366				Total	87	5311	61.046
Corrected for the mean of the observations:							Corrected for the mean of the observations:							Corrected for the mean of the observations:							Corrected for the mean of the observations:							Corrected for the mean of the observations:							Corrected for the mean of the observations:							Corrected for the mean of the observations:
	DF	SS	MS	F	P			DF	SS	MS	F	P			DF	SS	MS	F	P			DF	SS	MS	F	P			DF	SS	MS	F	P			DF	SS	MS	F	P			DF	SS	MS	F	P
Regression	1	3678.36	3678.36	59.3081	<0.0001		Regression	1	238.963	238.963	113.485	<0.0001		Regression	1	34989.5	34989.5	131.773	<0.0001		Regression	1	1342.16	1342.16	93.2233	<0.0001		Regression	1	120.302	120.302	281.215	<0.0001		Regression	1	8.4851	8.4851	56.8379	<0.0001		Regression	1	833.815	833.815	144.763	<0.0001
Residual	85	5271.8	62.0212				Residual	85	178.983	2.1057				Residual	85	22569.9	265.528				Residual	85	1223.77	14.3973				Residual	85	36.3624	0.4278				Residual	85	12.6893	0.1493				Residual	85	489.587	5.7599
Total	86	8950.16	104.072				Total	86	417.946	4.8598				Total	86	57559.4	669.295				Total	86	2565.93	29.8364				Total	86	156.664	1.8217				Total	86	21.1743	0.2462				Total	86	1323.4	15.3884
Statistical Tests:							Statistical Tests:							Statistical Tests:							Statistical Tests:							Statistical Tests:							Statistical Tests:							Statistical Tests:
PRESS		5683.6					PRESS		188.502					PRESS			23942.8				PRESS			1333.55				PRESS			38.8426				PRESS			13.5052				PRESS			522.59
Durbin-Watson Statistic		0.8105	Failed				Durbin-Watson Statistic		0.7718	Failed				Durbin-Watson Statistic			0.7479	Failed			Durbin-Watson Statistic			1.1759	Failed			Durbin-Watson Statistic			1.8191	Failed			Durbin-Watson Statistic			1.9703	Failed			Durbin-Watson Statistic			1.5117	Failed
Normality Test		Passed	(P = 0.0086)				Normality Test		Passed	(P = 0.0002)				Normality Test			Passed	(P = <0.0001)			Normality Test			Passed	(P = 0.0245)			Normality Test			Passed	(P = 0.0069)			Normality Test			Passed	(P = 0.0215)			Normality Test			Passed	(P = 0.0048)
K-S Statistic = 0.1745		Significance Level = 0.0086					K-S Statistic = 0,2253		Significance Level = 0,0002					K-S Statistic = 0.2409			Significance Level = <0.0001				K-S Statistic = 0.1569			Significance Level = 0.0245				K-S Statistic = 0.1779			Significance Level = 0.0069				K-S Statistic = 0.1592			Significance Level = 0.0215				K-S Statistic = 0.1836			Significance Level = 0.0048
Constant Variance Test		Passed	(P = 0.9184)				Constant Variance Test		Passed	(P = <0.0001)				Constant Variance Test			Passed	(P = <0.0001)			Constant Variance Test			Passed	(P = <0.0001)			Constant Variance Test			Passed	(P = <0.0001)			Constant Variance Test			Passed	(P = <0.0001)			Constant Variance Test			Passed	(P = <0.0001)
Power of performed test with alpha = <0.0001: 0.0000							Power of performed test with alpha = <0.0001: 0.0000							Power of performed test with alpha = <0.0001: 0.0000							Power of performed test with alpha = <0.0001: 0.0000							Power of performed test with alpha = <0.0001: 0.0000							Power of performed test with alpha = <0.0001: 0.0000							Power of performed test with alpha = <0.0001: 0.0000
Genome size (Mbp) vs. # sigmal transduction genes							Genome size (Mbp) vs. TAA stop codon usage (%)							Genome size (Mbp) vs. membrane transporters per Mb genome size							Genome size (Mbp) vs. average metagenomic fragment recruitment (log cov. per Gb)							Genome size (Mbp) vs. average metagenomic fragment recruitment global lakes (log cov. per Gb)							Genome size (Mbp) vs. max. metagenomic fragment recruitment (log cov. per Gb)							Genome size (Mbp) vs. max. metagenomic fragment recruitment global lakes (log cov. per Gb)
Nonlinear Regression							Nonlinear Regression							Nonlinear Regression							Nonlinear Regression							Nonlinear Regression							Nonlinear Regression							Nonlinear Regression
Equation: Polynomial; Linear							Equation: Polynomial; Linear							Equation: Polynomial; Linear							Equation: Polynomial; Linear							Equation: Polynomial; Linear							Equation: Polynomial; Linear							Equation: Polynomial; Linear
f=y0+a*x							f=y0+a*x							f=y0+a*x							f=y0+a*x							f=y0+a*x							f=y0+a*x							f=y0+a*x
R	Rsqr	Adj Rsqr	Standard Error of Estimate				R	Rsqr	Adj Rsqr	Standard Error of Estimate				R	Rsqr	Adj Rsqr	Standard Error of Estimate				R	Rsqr	Adj Rsqr	Standard Error of Estimate				R	Rsqr	Adj Rsqr	Standard Error of Estimate				R	Rsqr	Adj Rsqr	Standard Error of Estimate				R	Rsqr	Adj Rsqr	Standard Error of Estimate
0.6204	0.3849	0.3777	1.3208				0.6743	0.4546	0.4482	15.6197				0.5044	0.2544	0.2457	3.7464				0.8301	0.6891	0.6855	0.5365				0.655	0.429	0.4163	0.6992				0.8202	0.6728	0.669	0.5347				0.6156	0.379	0.3652	0.6935
	Coefficient	Std. Error	t	P	VIF			Coefficient	Std. Error	t	P	VIF			Coefficient	Std. Error	t	P	VIF			Coefficient	Std. Error	t	P	VIF			Coefficient	Std. Error	t	P	VIF			Coefficient	Std. Error	t	P	VIF			Coefficient	Std. Error	t	P	VIF
y0	2.0184	0.3247	6.2159	<0.0001	5.2584<		y0	82.9196	3.8401	21.5932	<0.0001	5.2584<		y0	24.3465	0.921	26.4335	<0.0001	5.2584<		y0	1.0049	0.1319	7.619	<0.0001	5.2584<		y0	0.0852	0.2738	0.3113	0.757	7.2096<		y0	1.9876	0.1314	15.1211	<0.0001	5.2584<		y0	1.1405	0.2716	4.1989	0.0001	7.2096<
a	9.7538e-07	1.3374e-07	7.293	<0.0001	5.2584<		a	-1.3314e-05	1.5817e-06	-8.4176	<0.0001	5.2584<		a	-2.0433e-06	3.7936e-07	-5.386	<0.0001	5.2584<		a	-7.4565e-07	5.4323e-08	-13.7264	<0.0001	5.2584<		a	-5.5652e-07	9.5715e-08	-5.8143	<0.0001	7.2096<		a	-7.1577e-07	5.414e-08	-13.2207	<0.0001	5.2584<		a	-4.9754e-07	9.4939e-08	-5.2406	<0.0001	7.2096<
Analysis of Variance:							Analysis of Variance:							Analysis of Variance:							Analysis of Variance:							Analysis of Variance:							Analysis of Variance:							Analysis of Variance:
Uncorrected for the mean of the observations:							Uncorrected for the mean of the observations:							Uncorrected for the mean of the observations:							Uncorrected for the mean of the observations:							Uncorrected for the mean of the observations:							Uncorrected for the mean of the observations:							Uncorrected for the mean of the observations:
	DF	SS	MS					DF	SS	MS					DF	SS	MS					DF	SS	MS					DF	SS	MS					DF	SS	MS					DF	SS	MS
Regression	2	1590.72	795.362				Regression	2	269391	134695				Regression	2	34798.7	17399.4				Regression	2	88.1306	44.0653				Regression	2	107.645	53.8223				Regression	2	65.5865	32.7932				Regression	2	14.7403	7.3702
Residual	85	148.275	1.7444				Residual	85	20737.8	243.974				Residual	85	1193.02	14.0355				Residual	85	24.4622	0.2878				Residual	45	21.997	0.4888				Residual	85	24.2982	0.2859				Residual	45	21.6416	0.4809
Total	87	1739	19.9885				Total	87	290129	3334.81				Total	87	35991.7	413.698				Total	87	112.593	1.2942				Total	47	129.642	2.7583				Total	87	89.8846	1.0332				Total	47	36.3819	0.7741
Corrected for the mean of the observations:							Corrected for the mean of the observations:							Corrected for the mean of the observations:							Corrected for the mean of the observations:							Corrected for the mean of the observations:							Corrected for the mean of the observations:							Corrected for the mean of the observations:
	DF	SS	MS	F	P			DF	SS	MS	F	P			DF	SS	MS	F	P			DF	SS	MS	F	P			DF	SS	MS	F	P			DF	SS	MS	F	P			DF	SS	MS	F	P
Regression	1	92.7821	92.7821	53.1881	<0.0001		Regression	1	17287.2	17287.2	70.8568	<0.0001		Regression	1	407.157	407.157	29.0091	<0.0001		Regression	1	54.2238	54.2238	188.414	<0.0001		Regression	1	16.5253	16.5253	33.8064	<0.0001		Regression	1	49.9646	49.9646	174.786	<0.0001		Regression	1	13.2083	13.2083	27.4643	<0.0001
Residual	85	148.275	1.7444				Residual	85	20737.8	243.974				Residual	85	1193.02	14.0355				Residual	85	24.4622	0.2878				Residual	45	21.997	0.4888				Residual	85	24.2982	0.2859				Residual	45	21.6416	0.4809
Total	86	241.058	2.803				Total	86	38025	442.151				Total	86	1600.17	18.6067				Total	86	78.686	0.915				Total	46	38.5223	0.8374				Total	86	74.2627	0.8635				Total	46	34.8499	0.7576
Statistical Tests:							Statistical Tests:							Statistical Tests:							Statistical Tests:							Statistical Tests:							Statistical Tests:							Statistical Tests:
PRESS		157.431					PRESS		22111.5					PRESS			1256.35				PRESS			25.7657				PRESS			23.877				PRESS			25.6985				PRESS			23.3792
Durbin-Watson Statistic		0.9808	Failed				Durbin-Watson Statistic		0.7247	Failed				Durbin-Watson Statistic			0.9827	Failed			Durbin-Watson Statistic			1.3393	Failed			Durbin-Watson Statistic			2.068	Failed			Durbin-Watson Statistic			1.4764	Failed			Durbin-Watson Statistic			2.0406	Failed
Normality Test		Passed	(P = 0.0538)				Normality Test		Passed	(P = 0.0065)				Normality Test			Passed	(P = 0.0773)			Normality Test			Passed	(P = 0.0284)			Normality Test			Passed	(P = 0.9499)			Normality Test			Passed	(P = 0.2749)			Normality Test			Passed	(P = 0.9868)
K-S Statistic = 0.1421		Significance Level = 0.0538					K-S Statistic = 0.1790		Significance Level = 0.0065					K-S Statistic = 0.1348			Significance Level = 0.0773				K-S Statistic = 0.1542			Significance Level = 0.0284				K-S Statistic = 0.0743			Significance Level = 0.9499				K-S Statistic = 0.1052			Significance Level = 0.2749				K-S Statistic = 0.0646			Significance Level = 0.9868
Constant Variance Test		Passed	(P = <0.0001)				Constant Variance Test		Passed	(P = 0.0203)				Constant Variance Test			Passed	(P = 0.0189)			Constant Variance Test			Passed	(P = 0.5579)			Constant Variance Test			Passed	(P = 0.7646)			Constant Variance Test			Passed	(P = 0.2308)			Constant Variance Test			Passed	(P = 0.1143)
Power of performed test with alpha = <0.0001: 0.0000							Power of performed test with alpha = <0.0001: 0.0000							Power of performed test with alpha = <0.0001: 0.0000							Power of performed test with alpha = <0.0001: 0.0000							Power of performed test with alpha = <0.0001: 0.0000							Power of performed test with alpha = <0.0001: 0.0000							Power of performed test with alpha = <0.0001: 0.0000
Supplementary Fig. 18 lower panels: Test for significant differences in genome size between cultures containing secretion systems (SS) and those without, between motile and non-motile strains, and between rhodopsin-bearing strains and aerobic anoxygenic bacteria
Genome size				Genome size				Genome size
t-Test: Two-Sample Assuming Unequal Variances				t-Test: Two-Sample Assuming Unequal Variances				t-Test: Two-Sample Assuming Unequal Variances
	size-SS	size-no-SS			size-motile	size-non-motile			size-rhodopsins	size-AAPs
Mean	3.14229e+06	1.73048e+06		Mean	3.39436e+06	1.69715e+06		Mean	1.74211e+06	2.78362e+06
Variance	6.91233e+11	7.07135e+11		Variance	5.85256e+11	5.27201e+11		Variance	7.25514e+11	4.26073e+11
Observations	28	59		Observations	25	62		Observations	59	15
Hypothesized Mean Difference	0			Hypothesized Mean Difference	0			Hypothesized Mean Difference	0
df	54			df	42			df	28
t Stat	7.37237			t Stat	9.50055			t Stat	-5.16247
P(T<=t) one-tail	5.11882e-10			P(T<=t) one-tail	2.5316e-12			P(T<=t) one-tail	8.89387e-06
t Critical one-tail	1.67356			t Critical one-tail	1.68195			t Critical one-tail	1.70113
P(T<=t) two-tail	1.02376e-09			P(T<=t) two-tail	5.06319e-12			P(T<=t) two-tail	1.77877e-05
t Critical two-tail	2.00488			t Critical two-tail	2.01808			t Critical two-tail	2.04841
Supplementary Fig. 19: Test for significant differences in genome size between microbes containing CRISPR-Cas and those without (cultures, MAGs, closely related references)
Genome size
t-Test: Two-Sample Assuming Unequal Variances
	CRISPR	no CRISPR
Mean	6.54832	6.32966
Variance	0.0338314	0.0542384
Observations	245	1482
Hypothesized Mean Difference	0
df	386
t Stat	16.5436
P(T<=t) one-tail	3.76186e-47
t Critical one-tail	1.64881
P(T<=t) two-tail	7.52372e-47
t Critical two-tail	1.96613
Supplementary Fig. 20: Test for significant differences in the growth of Limnohabitans simekii MiE-M12 in a medium without carbon sources except for vitamins in light:dark conditions (12:12 h) and in darkness.
Endpoint abundance (log(10)cells/ml)
t-Test: Paired Two Sample for Means
	dark	light:dark
Mean	6.50196	6.71887
Variance	0.000115682	0.000868746
Observations	3	3
Pearson Correlation	-0.518241
Hypothesized Mean Difference	0
df	2
t Stat	-10.3679
P(T<=t) one-tail	0.00458757
t Critical one-tail	2.91999
P(T<=t) two-tail	0.00917513
t Critical two-tail	4.30265
[truncated: 25 more columns]

## Sheet: 5-growth
Supplementary Data 5: Raw data (left side) and maximum yield and growth rates (right side) from all growth assays with cultures.
All data									Max. yield and max. growth rate
	taxonomy	strain	medium	time (days)	abundance (cells/ml)	growth rate (per day)			taxonomy	strain	medium	max. abundance (cells/ml)	max. growth rate (per day)	classification
	Sphingorhabdus communis	GE-11	0-all-media	0	19892.4				Sphingorhabdus communis	GE-11	1-med2	3.62184e+07	2.51212	copiotroph
	Sphingorhabdus communis	GE-11	1-med2	1	245295	0.16572			Sphingorhabdus communis	GE-11	1-med2	3.99473e+07	2.56767	copiotroph
	Sphingorhabdus communis	GE-11	1-med2	1	259305	0.163075			Sphingorhabdus communis	GE-11	1-med2	3.78093e+07	2.54592	copiotroph
	Sphingorhabdus communis	GE-11	1-med2	1	253726	0.164111			Sphingorhabdus communis	GE-11	2-med3	3.33734e+07	2.47648	copiotroph
	Sphingorhabdus communis	GE-11	1-med2	5	4.40328e+06	0.721911			Sphingorhabdus communis	GE-11	2-med3	32032000	2.40425	copiotroph
	Sphingorhabdus communis	GE-11	1-med2	5	4973400	0.738463			Sphingorhabdus communis	GE-11	2-med3	3.80277e+07	2.41565	copiotroph
	Sphingorhabdus communis	GE-11	1-med2	5	4.81152e+06	0.735628			Sphingorhabdus communis	GE-11	3-med4	6.84815e+07	2.40425	copiotroph
	Sphingorhabdus communis	GE-11	1-med2	8	1.5371e+07	0.416712			Sphingorhabdus communis	GE-11	3-med4	5.72495e+07	2.45367	copiotroph
	Sphingorhabdus communis	GE-11	1-med2	8	1.4986e+07	0.36767			Sphingorhabdus communis	GE-11	3-med4	5.90226e+07	2.4191	copiotroph
	Sphingorhabdus communis	GE-11	1-med2	8	1.5063e+07	0.380409			Sphingorhabdus communis	GE-11	7-10xmed2	7.36709e+07	2.42379	copiotroph
	Sphingorhabdus communis	GE-11	1-med2	11	1.63965e+07	0.021528			Sphingorhabdus communis	GE-11	7-10xmed2	6.34466e+07	2.3882	copiotroph
	Sphingorhabdus communis	GE-11	1-med2	11	1.62582e+07	0.027161			Sphingorhabdus communis	GE-11	7-10xmed2	6.75349e+07	2.45094	copiotroph
	Sphingorhabdus communis	GE-11	1-med2	11	1.57617e+07	0.0151144			Sphingorhabdus communis	GE-11	8-10xmed3	3.95234e+07	2.27774	copiotroph
	Sphingorhabdus communis	GE-11	1-med2	18	3.96665e+07	0.126205			Sphingorhabdus communis	GE-11	8-10xmed3	3.95656e+07	2.30977	copiotroph
	Sphingorhabdus communis	GE-11	1-med2	18	3.87326e+07	0.124012			Sphingorhabdus communis	GE-11	8-10xmed3	3.75246e+07	2.3027	copiotroph
	Sphingorhabdus communis	GE-11	1-med2	18	3.32492e+07	0.106635			Sphingorhabdus communis	GE-11	9-10xmed4	1.82793e+08	2.1715	copiotroph
	Sphingorhabdus communis	GE-11	1-med2	21	3.62184e+07	-0.0303133			Sphingorhabdus communis	GE-11	9-10xmed4	1.9019e+08	2.31704	copiotroph
	Sphingorhabdus communis	GE-11	1-med2	21	3.99473e+07	0.0102926			Sphingorhabdus communis	GE-11	9-10xmed4	1.84329e+08	2.40616	copiotroph
	Sphingorhabdus communis	GE-11	1-med2	21	3.78093e+07	0.0428416			Zwartia lucis	GE-14	1-med2	4.93196e+06	1.14954	mesotroph
	Sphingorhabdus communis	GE-11	1-med2	25	3.93683e+07	0.0208484			Zwartia lucis	GE-14	1-med2	5.47485e+06	1.05322	mesotroph
	Sphingorhabdus communis	GE-11	1-med2	25	3.67279e+07	-0.0210059			Zwartia lucis	GE-14	1-med2	5376000	0.946624	mesotroph
	Sphingorhabdus communis	GE-11	1-med2	25	2.91186e+07	-0.065294			Zwartia lucis	GE-14	2-med3	6390600	1.17219	mesotroph
	Sphingorhabdus communis	GE-11	2-med3	1	236705	0.167418			Zwartia lucis	GE-14	2-med3	6.21698e+06	1.13381	mesotroph
	Sphingorhabdus communis	GE-11	2-med3	1	220211	0.170857			Zwartia lucis	GE-14	2-med3	6.64878e+06	1.08698	mesotroph
	Sphingorhabdus communis	GE-11	2-med3	1	222737	0.170314			Zwartia lucis	GE-14	3-med4	1.28816e+07	1.07476	mesotroph
	Sphingorhabdus communis	GE-11	2-med3	5	5.26119e+06	0.775324			Zwartia lucis	GE-14	3-med4	1.29006e+07	1.06312	mesotroph
	Sphingorhabdus communis	GE-11	2-med3	5	4.66199e+06	0.763153			Zwartia lucis	GE-14	3-med4	12721800	1.00929	mesotroph
	Sphingorhabdus communis	GE-11	2-med3	5	5.56758e+06	0.804681			Zwartia lucis	GE-14	7-10xmed2	1.07827e+07	1.25999	mesotroph
	Sphingorhabdus communis	GE-11	2-med3	8	1.51161e+07	0.351801			Zwartia lucis	GE-14	7-10xmed2	1.1074e+07	1.33105	mesotroph
	Sphingorhabdus communis	GE-11	2-med3	8	1.38869e+07	0.363835			Zwartia lucis	GE-14	7-10xmed2	1.16447e+07	1.17177	mesotroph
	Sphingorhabdus communis	GE-11	2-med3	8	1.31923e+07	0.287558			Zwartia lucis	GE-14	8-10xmed3	8.66493e+06	1.08612	mesotroph
	Sphingorhabdus communis	GE-11	2-med3	11	1.73575e+07	0.0460879			Zwartia lucis	GE-14	8-10xmed3	8.56087e+06	1.14411	mesotroph
	Sphingorhabdus communis	GE-11	2-med3	11	1.43735e+07	0.0114789			Zwartia lucis	GE-14	8-10xmed3	1.37878e+07	1.14144	mesotroph
	Sphingorhabdus communis	GE-11	2-med3	11	1.34093e+07	0.00543761			Zwartia lucis	GE-14	9-10xmed4	1.00593e+08	1.25732	mesotroph
	Sphingorhabdus communis	GE-11	2-med3	18	4.14303e+07	0.124284			Zwartia lucis	GE-14	9-10xmed4	2.08955e+08	1.27072	mesotroph
	Sphingorhabdus communis	GE-11	2-med3	18	3.31144e+07	0.119226			Zwartia lucis	GE-14	9-10xmed4	1.01415e+08	1.29661	mesotroph
	Sphingorhabdus communis	GE-11	2-med3	18	3.63076e+07	0.142297			Acidimicobilacustris europeus	KE-4	1-med2	1.42934e+06	0.354928	oligotroph
	Sphingorhabdus communis	GE-11	2-med3	21	3.04758e+07	-0.10236			Acidimicobilacustris europeus	KE-4	1-med2	1.53388e+06	0.376298	oligotroph
	Sphingorhabdus communis	GE-11	2-med3	21	36446000	0.0319543			Acidimicobilacustris europeus	KE-4	1-med2	588442	0.259502	oligotroph
	Sphingorhabdus communis	GE-11	2-med3	21	3.55579e+07	-0.00695477			Acidimicobilacustris europeus	KE-4	2-med3	2.03363e+06	0.351608	oligotroph
	Sphingorhabdus communis	GE-11	2-med3	25	3.33734e+07	0.0227064			Acidimicobilacustris europeus	KE-4	2-med3	1.57953e+06	0.429289	oligotroph
	Sphingorhabdus communis	GE-11	2-med3	25	32032000	-0.0322741			Acidimicobilacustris europeus	KE-4	2-med3	978800	0.377382	oligotroph
	Sphingorhabdus communis	GE-11	2-med3	25	3.80277e+07	0.0167881			Acidimicobilacustris europeus	KE-4	3-med4	3.61501e+06	0.489343	oligotroph
	Sphingorhabdus communis	GE-11	3-med4	1	220211	0.170857			Acidimicobilacustris europeus	KE-4	3-med4	5.70714e+06	0.619544	oligotroph
	Sphingorhabdus communis	GE-11	3-med4	1	231368	0.168504			Acidimicobilacustris europeus	KE-4	3-med4	7.58893e+06	0.491577	oligotroph
	Sphingorhabdus communis	GE-11	3-med4	1	223505	0.17015			Acidimicobilacustris europeus	KE-4	7-10xmed2	74694.7	0.337314	oligotroph
	Sphingorhabdus communis	GE-11	3-med4	5	1.27854e+07	1.01537			Acidimicobilacustris europeus	KE-4	7-10xmed2	68073.7	0.309708	oligotroph
	Sphingorhabdus communis	GE-11	3-med4	5	1.29024e+07	1.00529			Acidimicobilacustris europeus	KE-4	7-10xmed2	35789.5	0.0469823	oligotroph
	Sphingorhabdus communis	GE-11	3-med4	5	1.2089e+07	0.997654			Acidimicobilacustris europeus	KE-4	8-10xmed3	1.17142e+06	0.308509	oligotroph
	Sphingorhabdus communis	GE-11	3-med4	8	4.72212e+07	0.435514			Acidimicobilacustris europeus	KE-4	8-10xmed3	120074	0.292349	oligotroph
	Sphingorhabdus communis	GE-11	3-med4	8	4.72663e+07	0.432794			Acidimicobilacustris europeus	KE-4	8-10xmed3	360800	0.236115	oligotroph
	Sphingorhabdus communis	GE-11	3-med4	8	3.85516e+07	0.386567			Acidimicobilacustris europeus	KE-4	9-10xmed4	14142700	0.516482	oligotroph
	Sphingorhabdus communis	GE-11	3-med4	11	2.82586e+07	-0.171148			Acidimicobilacustris europeus	KE-4	9-10xmed4	15496300	0.565131	oligotroph
	Sphingorhabdus communis	GE-11	3-med4	11	2.76961e+07	-0.178169			Acidimicobilacustris europeus	KE-4	9-10xmed4		0.505308	oligotroph
	Sphingorhabdus communis	GE-11	3-med4	11	2.79755e+07	-0.10689			Pernthalerella lacunae	MaE-M21	1-med2	1.44394e+07	1.19974	mesotroph
	Sphingorhabdus communis	GE-11	3-med4	18	6.84815e+07	0.126452			Pernthalerella lacunae	MaE-M21	1-med2	1.61053e+07	1.54991	mesotroph
	Sphingorhabdus communis	GE-11	3-med4	18	5.72495e+07	0.103732			Pernthalerella lacunae	MaE-M21	1-med2	1.77342e+07	1.53603	mesotroph
	Sphingorhabdus communis	GE-11	3-med4	18	5.90226e+07	0.106656			Pernthalerella lacunae	MaE-M21	2-med3	1.38582e+07	1.3338	mesotroph
	Sphingorhabdus communis	GE-11	3-med4	21	6.27759e+07	-0.0289974			Pernthalerella lacunae	MaE-M21	2-med3	1.50515e+07	1.2769	mesotroph
	Sphingorhabdus communis	GE-11	3-med4	21	5.54846e+07	-0.0104375			Pernthalerella lacunae	MaE-M21	2-med3	1.41842e+07	1.16423	mesotroph
	Sphingorhabdus communis	GE-11	3-med4	21	6.06229e+07	0.00891751			Pernthalerella lacunae	MaE-M21	3-med4	1.06086e+07	1.78015	mesotroph
	Sphingorhabdus communis	GE-11	3-med4	25	6.25534e+07	-0.000887768			Pernthalerella lacunae	MaE-M21	3-med4	1.27554e+07	1.533	mesotroph
	Sphingorhabdus communis	GE-11	3-med4	25	5.41628e+07	-0.00602774			Pernthalerella lacunae	MaE-M21	3-med4	1.35792e+07	1.50215	mesotroph
	Sphingorhabdus communis	GE-11	3-med4	25	6.08206e+07	0.000813894			Pernthalerella lacunae	MaE-M21	7-10xmed2	2.07053e+07	1.3572	mesotroph
	Sphingorhabdus communis	GE-11	5-MM	1	160989	0.185774			Pernthalerella lacunae	MaE-M21	7-10xmed2	2.18481e+07	1.41344	mesotroph
	Sphingorhabdus communis	GE-11	5-MM	1	187221	0.178586			Pernthalerella lacunae	MaE-M21	7-10xmed2	2.31684e+07	1.41739	mesotroph
	Sphingorhabdus communis	GE-11	5-MM	1	183684	0.179494			Pernthalerella lacunae	MaE-M21	8-10xmed3	1.45983e+07	1.40346	mesotroph
	Sphingorhabdus communis	GE-11	5-MM	5	1.64233e+06	0.580633			Pernthalerella lacunae	MaE-M21	8-10xmed3	1.26653e+07	1.36938	mesotroph
	Sphingorhabdus communis	GE-11	5-MM	5	1.61319e+06	0.53842			Pernthalerella lacunae	MaE-M21	8-10xmed3	1.54807e+07	1.24032	mesotroph
	Sphingorhabdus communis	GE-11	5-MM	5	1.56624e+06	0.535804			Pernthalerella lacunae	MaE-M21	9-10xmed4	2.90019e+07	1.91594	mesotroph
	Sphingorhabdus communis	GE-11	5-MM	8	2.08919e+06	0.0802208			Pernthalerella lacunae	MaE-M21	9-10xmed4	2.53607e+07	2.15297	mesotroph
	Sphingorhabdus communis	GE-11	5-MM	8	1.96842e+06	0.0663395			Pernthalerella lacunae	MaE-M21	9-10xmed4	2.92724e+07	1.89061	mesotroph
	Sphingorhabdus communis	GE-11	5-MM	8	1.92723e+06	0.0691351			Limnohabitans kasalickyi	MaE-M4	1-med2	8.06036e+06	2.53865	copiotroph
	Sphingorhabdus communis	GE-11	5-MM	11	1.35958e+06	-0.1432			Limnohabitans kasalickyi	MaE-M4	1-med2	7425400	2.44943	copiotroph
	Sphingorhabdus communis	GE-11	5-MM	11	1.24926e+06	-0.151559			Limnohabitans kasalickyi	MaE-M4	1-med2	7.02498e+06	2.05005	copiotroph
	Sphingorhabdus communis	GE-11	5-MM	11	1.05263e+06	-0.201597			Limnohabitans kasalickyi	MaE-M4	2-med3	1.48163e+07	1.77213	copiotroph
	Sphingorhabdus communis	GE-11	5-MM	18	3.07356e+06	0.116523			Limnohabitans kasalickyi	MaE-M4	2-med3	7.62819e+06	2.34091	copiotroph
	Sphingorhabdus communis	GE-11	5-MM	18	2.99474e+06	0.1249			Limnohabitans kasalickyi	MaE-M4	2-med3	6.70487e+06	2.27966	copiotroph
	Sphingorhabdus communis	GE-11	5-MM	18	2.63989e+06	0.131349			Limnohabitans kasalickyi	MaE-M4	3-med4	7.87371e+06	2.04386	copiotroph
	Sphingorhabdus communis	GE-11	5-MM	21	2.42499e+06	-0.0790029			Limnohabitans kasalickyi	MaE-M4	3-med4	6.86978e+06	2.01225	copiotroph
	Sphingorhabdus communis	GE-11	5-MM	21	2.61761e+06	-0.0448648			Limnohabitans kasalickyi	MaE-M4	3-med4	5.68937e+06	1.99861	copiotroph
	Sphingorhabdus communis	GE-11	5-MM	21	2.37566e+06	-0.0351541			Limnohabitans kasalickyi	MaE-M4	7-10xmed2	8.95774e+06	2.0151	copiotroph
	Sphingorhabdus communis	GE-11	5-MM	25	1.85419e+06	-0.0670949			Limnohabitans kasalickyi	MaE-M4	7-10xmed2	7.87876e+06	2.04477	copiotroph
	Sphingorhabdus communis	GE-11	5-MM	25	1.82353e+06	-0.0903724			Limnohabitans kasalickyi	MaE-M4	7-10xmed2	8.54228e+06	1.84403	copiotroph
	Sphingorhabdus communis	GE-11	5-MM	25	2023200	-0.0401491			Limnohabitans kasalickyi	MaE-M4	8-10xmed3	5.70509e+06	2.17521	copiotroph
	Sphingorhabdus communis	GE-11	6-med2+MM	1	58021.1	0.234371			Limnohabitans kasalickyi	MaE-M4	8-10xmed3	6.73007e+06	2.09768	copiotroph
	Sphingorhabdus communis	GE-11	6-med2+MM	1	62810.5	0.230594			Limnohabitans kasalickyi	MaE-M4	8-10xmed3	5.48897e+06	2.13134	copiotroph
	Sphingorhabdus communis	GE-11	6-med2+MM	1	65757.9	0.22841			Limnohabitans kasalickyi	MaE-M4	9-10xmed4	1.37878e+08	2.71139	copiotroph
	Sphingorhabdus communis	GE-11	6-med2+MM	5	24568.4	-0.214836			Limnohabitans kasalickyi	MaE-M4	9-10xmed4	1.70577e+08	2.72185	copiotroph
	Sphingorhabdus communis	GE-11	6-med2+MM	5	24021.1	-0.240298			Limnohabitans kasalickyi	MaE-M4	9-10xmed4	4.73125e+08	2.61175	copiotroph
	Sphingorhabdus communis	GE-11	6-med2+MM	5	23652.6	-0.255626			Sphingobium cupriresistens	MiE-4	1-med2	6.38439e+06	1.09077	mesotroph
	Sphingorhabdus communis	GE-11	6-med2+MM	8	45031.6	0.201967			Sphingobium cupriresistens	MiE-4	1-med2	6.21363e+06	1.01426	mesotroph
	Sphingorhabdus communis	GE-11	6-med2+MM	8	32631.6	0.102117			Sphingobium cupriresistens	MiE-4	1-med2	6.27155e+06	0.924519	mesotroph
	Sphingorhabdus communis	GE-11	6-med2+MM	8	38389.5	0.161436			Sphingobium cupriresistens	MiE-4	2-med3	4.11771e+06	0.827843	mesotroph
	Sphingorhabdus communis	GE-11	6-med2+MM	11	36494.7	-0.0700653			Sphingobium cupriresistens	MiE-4	2-med3	4.02915e+06	0.911826	mesotroph
	Sphingorhabdus communis	GE-11	6-med2+MM	11	50105.3	0.142949			Sphingobium cupriresistens	MiE-4	2-med3	3827000	1.02347	mesotroph
	Sphingorhabdus communis	GE-11	6-med2+MM	11	37052.6	-0.0118146			Sphingobium cupriresistens	MiE-4	3-med4	1.57665e+07	1.73581	mesotroph
	Sphingorhabdus communis	GE-11	6-med2+MM	18	3.83598e+06	0.665002			Sphingobium cupriresistens	MiE-4	3-med4	1.45369e+07	1.63364	mesotroph
	Sphingorhabdus communis	GE-11	6-med2+MM	18	4.01046e+06	0.626077			Sphingobium cupriresistens	MiE-4	3-med4	1.45435e+07	1.7288	mesotroph
	Sphingorhabdus communis	GE-11	6-med2+MM	18	3618600	0.6545			Sphingobium cupriresistens	MiE-4	7-10xmed2	6.93853e+06	1.13424	mesotroph
	Sphingorhabdus communis	GE-11	6-med2+MM	21	4.67082e+06	0.0656367			Sphingobium cupriresistens	MiE-4	7-10xmed2	6.41594e+06	0.83295	mesotroph
	Sphingorhabdus communis	GE-11	6-med2+MM	21	5.74893e+06	0.120035			Sphingobium cupriresistens	MiE-4	7-10xmed2	7.24155e+06	0.950639	mesotroph
	Sphingorhabdus communis	GE-11	6-med2+MM	21	4.65637e+06	0.0840495			Sphingobium cupriresistens	MiE-4	8-10xmed3	4.41937e+06	1.34499	mesotroph
	Sphingorhabdus communis	GE-11	6-med2+MM	25	4.05747e+06	-0.0351936			Sphingobium cupriresistens	MiE-4	8-10xmed3	5.23284e+06	1.08238	mesotroph
	Sphingorhabdus communis	GE-11	6-med2+MM	25	4.09929e+06	-0.0845495			Sphingobium cupriresistens	MiE-4	8-10xmed3	3.46916e+06	1.18648	mesotroph
	Sphingorhabdus communis	GE-11	6-med2+MM	25	4.48208e+06	-0.00953692			Sphingobium cupriresistens	MiE-4	9-10xmed4	2.32499e+08	2.43787	mesotroph
	Sphingorhabdus communis	GE-11	7-10xmed2	1	224558	0.169926			Sphingobium cupriresistens	MiE-4	9-10xmed4	4.53645e+08	2.4507	mesotroph
	Sphingorhabdus communis	GE-11	7-10xmed2	1	216705	0.171621			Sphingobium cupriresistens	MiE-4	9-10xmed4	5.07878e+08	2.39274	mesotroph
	Sphingorhabdus communis	GE-11	7-10xmed2	1	230737	0.168634			Aquidulcibacter miladensis	MiH-15	1-med2	2.73933e+06	0.537224	oligotroph
	Sphingorhabdus communis	GE-11	7-10xmed2	5	1.30047e+07	1.01473			Aquidulcibacter miladensis	MiH-15	1-med2	2.87183e+06	0.611981	oligotroph
	Sphingorhabdus communis	GE-11	7-10xmed2	5	1.10778e+07	0.983541			Aquidulcibacter miladensis	MiH-15	1-med2	2.35626e+06	0.69819	oligotroph
	Sphingorhabdus communis	GE-11	7-10xmed2	5	1.30715e+07	1.00923			Aquidulcibacter miladensis	MiH-15	2-med3	2.39264e+06	0.718915	oligotroph
	Sphingorhabdus communis	GE-11	7-10xmed2	8	4.80821e+07	0.435866			Aquidulcibacter miladensis	MiH-15	2-med3	2.34513e+06	0.874887	oligotroph
	Sphingorhabdus communis	GE-11	7-10xmed2	8	4.51776e+07	0.468552			Aquidulcibacter miladensis	MiH-15	2-med3	2.25326e+06	0.895237	oligotroph
	Sphingorhabdus communis	GE-11	7-10xmed2	8	4.62177e+07	0.420976			Aquidulcibacter miladensis	MiH-15	3-med4	3.02793e+06	0.775897	oligotroph
	Sphingorhabdus communis	GE-11	7-10xmed2	11	2.84547e+07	-0.174865			Aquidulcibacter miladensis	MiH-15	3-med4	3.41734e+06	1.08735	oligotroph
	Sphingorhabdus communis	GE-11	7-10xmed2	11	2.82993e+07	-0.155922			Aquidulcibacter miladensis	MiH-15	3-med4	2.75699e+06	1.07796	oligotroph
	Sphingorhabdus communis	GE-11	7-10xmed2	11	25892000	-0.193143			Aquidulcibacter miladensis	MiH-15	7-10xmed2	665221	0.400378	oligotroph
	Sphingorhabdus communis	GE-11	7-10xmed2	18	7.36709e+07	0.135899			Aquidulcibacter miladensis	MiH-15	7-10xmed2	291253	0.429683	oligotroph
	Sphingorhabdus communis	GE-11	7-10xmed2	18	6.34466e+07	0.115338			Aquidulcibacter miladensis	MiH-15	7-10xmed2	674453	0.0870712	oligotroph
	Sphingorhabdus communis	GE-11	7-10xmed2	18	6.75349e+07	0.136959			Aquidulcibacter miladensis	MiH-15	8-10xmed3	1.78323e+06	0.636948	oligotroph
	Sphingorhabdus communis	GE-11	7-10xmed2	21	6.43378e+07	-0.0451538			Aquidulcibacter miladensis	MiH-15	8-10xmed3	1.61789e+06	0.762742	oligotroph
	Sphingorhabdus communis	GE-11	7-10xmed2	21	6.36481e+07	0.00105682			Aquidulcibacter miladensis	MiH-15	8-10xmed3	1.55201e+06	0.822438	oligotroph
	Sphingorhabdus communis	GE-11	7-10xmed2	21	6.75672e+07	0.000158944			Aquidulcibacter miladensis	MiH-15	9-10xmed4	7.66832e+06	0.651621	oligotroph
	Sphingorhabdus communis	GE-11	7-10xmed2	25	5.87861e+07	-0.0225604			Aquidulcibacter miladensis	MiH-15	9-10xmed4	7.23902e+06	0.558697	oligotroph
	Sphingorhabdus communis	GE-11	7-10xmed2	25	5.28169e+07	-0.0466344			Aquidulcibacter miladensis	MiH-15	9-10xmed4	1.01145e+07	0.580993	oligotroph
	Sphingorhabdus communis	GE-11	7-10xmed2	25	5.80393e+07	-0.0380006			Caulobacter lacus	MiH-16	1-med2	1.49664e+07	1.65068	mesotroph
	Sphingorhabdus communis	GE-11	8-10xmed3	1	194042	0.176882			Caulobacter lacus	MiH-16	1-med2	1.06234e+06	1.33275	mesotroph
	Sphingorhabdus communis	GE-11	8-10xmed3	1	200358	0.175356			Caulobacter lacus	MiH-16	1-med2	754811	1.15772	mesotroph
	Sphingorhabdus communis	GE-11	8-10xmed3	1	198947	0.175693			Caulobacter lacus	MiH-16	2-med3	1.55833e+07	1.43392	mesotroph
	Sphingorhabdus communis	GE-11	8-10xmed3	5	5.08191e+06	0.816342			Caulobacter lacus	MiH-16	2-med3	1.01937e+06	1.14983	mesotroph
	Sphingorhabdus communis	GE-11	8-10xmed3	5	5.56475e+06	0.831025			Caulobacter lacus	MiH-16	2-med3	1.02104e+06	1.29536	mesotroph
	Sphingorhabdus communis	GE-11	8-10xmed3	5	4.75679e+06	0.793572			Caulobacter lacus	MiH-16	3-med4	59722200	1.36067	mesotroph
	Sphingorhabdus communis	GE-11	8-10xmed3	8	8.44316e+06	0.169223			Caulobacter lacus	MiH-16	3-med4	118062500	2.17493	mesotroph
	Sphingorhabdus communis	GE-11	8-10xmed3	8	8.87762e+06	0.155694			Caulobacter lacus	MiH-16	3-med4	81179600	2.27465	mesotroph
	Sphingorhabdus communis	GE-11	8-10xmed3	8	9.18382e+06	0.21929			Caulobacter lacus	MiH-16	7-10xmed2	10956100	1.60732	mesotroph
	Sphingorhabdus communis	GE-11	8-10xmed3	11	6.46443e+06	-0.0890138			Caulobacter lacus	MiH-16	7-10xmed2	36754800	1.73129	mesotroph
	Sphingorhabdus communis	GE-11	8-10xmed3	11	5.38871e+06	-0.166409			Caulobacter lacus	MiH-16	7-10xmed2	34659900	1.77876	mesotroph
	Sphingorhabdus communis	GE-11	8-10xmed3	11	5.10549e+06	-0.195709			Caulobacter lacus	MiH-16	8-10xmed3	11175400	1.61833	mesotroph
	Sphingorhabdus communis	GE-11	8-10xmed3	18	4.26076e+07	0.269388			Caulobacter lacus	MiH-16	8-10xmed3	34695400	1.68731	mesotroph
	Sphingorhabdus communis	GE-11	8-10xmed3	18	3.71663e+07	0.275871			Caulobacter lacus	MiH-16	8-10xmed3	38676100	1.84059	mesotroph
	Sphingorhabdus communis	GE-11	8-10xmed3	18	3.45269e+07	0.27306			Caulobacter lacus	MiH-16	9-10xmed4	145464300	2.4369	mesotroph
	Sphingorhabdus communis	GE-11	8-10xmed3	21	3.95234e+07	-0.0250467			Caulobacter lacus	MiH-16	9-10xmed4	168227200	2.54929	mesotroph
	Sphingorhabdus communis	GE-11	8-10xmed3	21	3.95656e+07	0.0208522			Caulobacter lacus	MiH-16	9-10xmed4	175789500	2.44548	mesotroph
	Sphingorhabdus communis	GE-11	8-10xmed3	21	3.75246e+07	0.0277525			Fimbriicoccus planktonicus	MsE-15	1-med2	1.01315e+06	0.379315	oligotroph
	Sphingorhabdus communis	GE-11	8-10xmed3	25	29474000	-0.0733459			Fimbriicoccus planktonicus	MsE-15	1-med2	1.17249e+06	0.404781	oligotroph
	Sphingorhabdus communis	GE-11	8-10xmed3	25	3.58421e+07	-0.024709			Fimbriicoccus planktonicus	MsE-15	1-med2	1.23692e+06	0.461187	oligotroph
	Sphingorhabdus communis	GE-11	8-10xmed3	25	4.00341e+07	0.0161835			Fimbriicoccus planktonicus	MsE-15	2-med3	1.20074e+06	0.420292	oligotroph
	Sphingorhabdus communis	GE-11	9-10xmed4	1	174484	0.181941			Fimbriicoccus planktonicus	MsE-15	2-med3	1.22034e+06	0.417225	oligotroph
	Sphingorhabdus communis	GE-11	9-10xmed4	1	201821	0.17501			Fimbriicoccus planktonicus	MsE-15	2-med3	1.23257e+06	0.382418	oligotroph
	Sphingorhabdus communis	GE-11	9-10xmed4	1	220632	0.170766			Fimbriicoccus planktonicus	MsE-15	7-10xmed2	3.37605e+06	0.275602	oligotroph
	Sphingorhabdus communis	GE-11	9-10xmed4	5	3.90923e+06	0.777315			Fimbriicoccus planktonicus	MsE-15	7-10xmed2	3.75154e+06	0.257952	oligotroph
	Sphingorhabdus communis	GE-11	9-10xmed4	5	6.07175e+06	0.851005			Fimbriicoccus planktonicus	MsE-15	7-10xmed2	3.53444e+06	0.297755	oligotroph
	Sphingorhabdus communis	GE-11	9-10xmed4	5	6.78934e+06	0.856654			Fimbriicoccus planktonicus	MsE-15	8-10xmed3	4.49222e+06	0.258232	oligotroph
	Sphingorhabdus communis	GE-11	9-10xmed4	8	1.30055e+08	1.16821			Fimbriicoccus planktonicus	MsE-15	8-10xmed3	4.49858e+06	0.333715	oligotroph
	Sphingorhabdus communis	GE-11	9-10xmed4	8	1.38885e+08	1.04333			Fimbriicoccus planktonicus	MsE-15	8-10xmed3	4.30404e+06	0.297076	oligotroph
	Sphingorhabdus communis	GE-11	9-10xmed4	8	1.39355e+08	1.00722			Fimbriicoccus planktonicus	MsE-15	9-10xmed4	1.91025e+07	0.447537	oligotroph
	Sphingorhabdus communis	GE-11	9-10xmed4	11	1.02884e+08	-0.0781173			Fimbriicoccus planktonicus	MsE-15	9-10xmed4	2.02823e+07	0.441114	oligotroph
	Sphingorhabdus communis	GE-11	9-10xmed4	11	8.59082e+07	-0.160121			Fimbriicoccus planktonicus	MsE-15	9-10xmed4	1.88501e+07	0.422324	oligotroph
	Sphingorhabdus communis	GE-11	9-10xmed4	11	8.48293e+07	-0.165461			Planktophila versatilis	MsE-18	1-med2	272695	0.421699	oligotroph
	Sphingorhabdus communis	GE-11	9-10xmed4	18	1.82793e+08	0.0821067			Planktophila versatilis	MsE-18	1-med2	362400	0.424362	oligotroph
	Sphingorhabdus communis	GE-11	9-10xmed4	18	1.9019e+08	0.113535			Planktophila versatilis	MsE-18	1-med2	408895	0.446251	oligotroph
	Sphingorhabdus communis	GE-11	9-10xmed4	18	1.84329e+08	0.110869			Planktophila versatilis	MsE-18	2-med3	484095	0.425427	oligotroph
	Sphingorhabdus communis	GE-11	9-10xmed4	21	7.39314e+07	-0.301738			Planktophila versatilis	MsE-18	2-med3	570674	0.482635	oligotroph
	Sphingorhabdus communis	GE-11	9-10xmed4	21	1.916e+08	0.00246136			Planktophila versatilis	MsE-18	2-med3	399895	0.607729	oligotroph
	Sphingorhabdus communis	GE-11	9-10xmed4	21	1.72322e+08	-0.0224523			Planktophila versatilis	MsE-18	3-med4	518937	0.356546	oligotroph
	Sphingorhabdus communis	GE-11	9-10xmed4	25	1.59811e+08	0.192713			Planktophila versatilis	MsE-18	3-med4	364779	0.505405	oligotroph
	Sphingorhabdus communis	GE-11	9-10xmed4	25	1.54562e+08	-0.0537037			Planktophila versatilis	MsE-18	3-med4	1.63807e+06	0.833875	oligotroph
	Sphingorhabdus communis	GE-11	9-10xmed4	25	1.66335e+08	-0.0088411			Planktophila versatilis	MsE-18	7-10xmed2	9.13658e+06	0.663542	oligotroph
	Zwartia lucis	GE-14	0-all-media	0	11220.7				Planktophila versatilis	MsE-18	7-10xmed2	8.94727e+06	0.639679	oligotroph
	Zwartia lucis	GE-14	1-med2	1	35421.1	0.53972			Planktophila versatilis	MsE-18	7-10xmed2	9.39655e+06	0.813125	oligotroph
	Zwartia lucis	GE-14	1-med2	1	32168.4	0.549352			Planktophila versatilis	MsE-18	8-10xmed3	1.03776e+07	0.815045	oligotroph
	Zwartia lucis	GE-14	1-med2	1	28915.8	0.560012			Planktophila versatilis	MsE-18	8-10xmed3	1.01614e+07	0.865559	oligotroph
	Zwartia lucis	GE-14	1-med2	5	124916	0.315083			Planktophila versatilis	MsE-18	8-10xmed3	9.87007e+06	0.819364	oligotroph
	Zwartia lucis	GE-14	1-med2	5	112768	0.313588			Planktophila versatilis	MsE-18	9-10xmed4	29045200	0.779094	oligotroph
	Zwartia lucis	GE-14	1-med2	5	106242	0.325333			Planktophila versatilis	MsE-18	9-10xmed4	29135500	0.800854	oligotroph
	Zwartia lucis	GE-14	1-med2	8	1.00955e+06	0.696539			Planktophila versatilis	MsE-18	9-10xmed4	29383300	0.802503	oligotroph
	Zwartia lucis	GE-14	1-med2	8	1.05127e+06	0.74414			Allorhodoferax lacus	MsE-M18	1-med2	1.20999e+07	2.08542	copiotroph
	Zwartia lucis	GE-14	1-med2	8	1.11257e+06	0.782902			Allorhodoferax lacus	MsE-M18	1-med2	1.11715e+07	2.24413	copiotroph
	Zwartia lucis	GE-14	1-med2	11	1.83982e+06	0.200055			Allorhodoferax lacus	MsE-M18	1-med2	1.03565e+07	2.40774	copiotroph
	Zwartia lucis	GE-14	1-med2	11	2.26872e+06	0.256404			Allorhodoferax lacus	MsE-M18	2-med3	2.37543e+08	1.66262	copiotroph
	Zwartia lucis	GE-14	1-med2	11	2206600	0.228261			Allorhodoferax lacus	MsE-M18	2-med3	2.01463e+08	2.50686	copiotroph
	Zwartia lucis	GE-14	1-med2	18	4.93196e+06	0.140867			Allorhodoferax lacus	MsE-M18	2-med3	2.14731e+08	2.51208	copiotroph
	Zwartia lucis	GE-14	1-med2	18	5.47485e+06	0.12585			Allorhodoferax lacus	MsE-M18	3-med4	3.88946e+08	2.51835	copiotroph
	Zwartia lucis	GE-14	1-med2	18	5376000	0.127213			Allorhodoferax lacus	MsE-M18	3-med4	3.13386e+08	2.71284	copiotroph
	Zwartia lucis	GE-14	1-med2	21	4.52101e+06	-0.0290002			Allorhodoferax lacus	MsE-M18	3-med4	3.33631e+08	2.77759	copiotroph
	Zwartia lucis	GE-14	1-med2	21	4.34204e+06	-0.0772735			Allorhodoferax lacus	MsE-M18	7-10xmed2	38940000	2.69376	copiotroph
	Zwartia lucis	GE-14	1-med2	21	4.54085e+06	-0.0562766			Allorhodoferax lacus	MsE-M18	7-10xmed2	1.30495e+07	2.56367	copiotroph
	Zwartia lucis	GE-14	1-med2	25	3.66423e+06	-0.0525292			Allorhodoferax lacus	MsE-M18	7-10xmed2	1.90284e+07	2.53422	copiotroph
	Zwartia lucis	GE-14	1-med2	25	4.01764e+06	-0.0194124			Allorhodoferax lacus	MsE-M18	8-10xmed3	2.36342e+08	2.60869	copiotroph
	Zwartia lucis	GE-14	1-med2	25	3.64215e+06	-0.0551353			Allorhodoferax lacus	MsE-M18	8-10xmed3	1.85381e+08	2.36469	copiotroph
	Zwartia lucis	GE-14	2-med3	1	29473.7	0.558101			Allorhodoferax lacus	MsE-M18	8-10xmed3	2.13748e+08	2.62681	copiotroph
	Zwartia lucis	GE-14	2-med3	1	37126.3	0.535018			Allorhodoferax lacus	MsE-M18	9-10xmed4	1.39474e+09	2.92224	copiotroph
	Zwartia lucis	GE-14	2-med3	1	29126.3	0.559287			Allorhodoferax lacus	MsE-M18	9-10xmed4	2.32293e+08	2.91673	copiotroph
	Zwartia lucis	GE-14	2-med3	5	84842.1	0.264324			Allorhodoferax lacus	MsE-M18	9-10xmed4	1.73437e+09	2.9811	copiotroph
	Zwartia lucis	GE-14	2-med3	5	81831.6	0.197584			Rhabdaerophilum aquaticum	MsE-M23	1-med2	119179	2.86152	copiotroph
	Zwartia lucis	GE-14	2-med3	5	110747	0.333902			Rhabdaerophilum aquaticum	MsE-M23	1-med2	154526	2.76054	copiotroph
	Zwartia lucis	GE-14	2-med3	8	2.85649e+06	1.17219			Rhabdaerophilum aquaticum	MsE-M23	1-med2	305432	2.95086	copiotroph
	Zwartia lucis	GE-14	2-med3	8	2.45551e+06	1.13381			Rhabdaerophilum aquaticum	MsE-M23	2-med3	248284	2.80294	copiotroph
	Zwartia lucis	GE-14	2-med3	8	2.88767e+06	1.08698			Rhabdaerophilum aquaticum	MsE-M23	2-med3	106874	2.6232	copiotroph
	Zwartia lucis	GE-14	2-med3	11	3.61793e+06	0.0787686			Rhabdaerophilum aquaticum	MsE-M23	2-med3	198874	2.73822	copiotroph
	Zwartia lucis	GE-14	2-med3	11	2.46463e+06	0.0012366			Rhabdaerophilum aquaticum	MsE-M23	3-med4	532768	2.77635	copiotroph
	Zwartia lucis	GE-14	2-med3	11	3.22289e+06	0.0366096			Rhabdaerophilum aquaticum	MsE-M23	3-med4	654968	2.54877	copiotroph
	Zwartia lucis	GE-14	2-med3	18	6390600	0.0812753			Rhabdaerophilum aquaticum	MsE-M23	3-med4	670737	2.56877	copiotroph
	Zwartia lucis	GE-14	2-med3	18	6.21698e+06	0.132177			Rhabdaerophilum aquaticum	MsE-M23	7-10xmed2	80168.4	2.43835	copiotroph
	Zwartia lucis	GE-14	2-med3	18	6.64878e+06	0.10345			Rhabdaerophilum aquaticum	MsE-M23	7-10xmed2	26105.3	2.40041	copiotroph
	Zwartia lucis	GE-14	2-med3	21	5.70121e+06	-0.0380499			Rhabdaerophilum aquaticum	MsE-M23	7-10xmed2	216768	2.36463	copiotroph
	Zwartia lucis	GE-14	2-med3	21	5.27447e+06	-0.0548017			Rhabdaerophilum aquaticum	MsE-M23	8-10xmed3	106600	2.3767	copiotroph
	Zwartia lucis	GE-14	2-med3	21	5.13182e+06	-0.0863242			Rhabdaerophilum aquaticum	MsE-M23	8-10xmed3	194211	2.28898	copiotroph
	Zwartia lucis	GE-14	2-med3	25	4.28371e+06	-0.071465			Rhabdaerophilum aquaticum	MsE-M23	8-10xmed3	161611	2.33568	copiotroph
	Zwartia lucis	GE-14	2-med3	25	4.08503e+06	-0.0638874			Rhabdaerophilum aquaticum	MsE-M23	9-10xmed4	1085400	2.52836	copiotroph
	Zwartia lucis	GE-14	2-med3	25	4.12797e+06	-0.0544188			Rhabdaerophilum aquaticum	MsE-M23	9-10xmed4	1.72326e+06	2.60809	copiotroph
	Zwartia lucis	GE-14	3-med4	1	28842.1	0.560267			Rhabdaerophilum aquaticum	MsE-M23	9-10xmed4	1.50453e+06	2.45734	copiotroph
	Zwartia lucis	GE-14	3-med4	1	28631.6	0.561			Planktophila dulcis	MsH-2	1-med2	147874	0.234845	oligotroph
	Zwartia lucis	GE-14	3-med4	1	24347.4	0.577208			Planktophila dulcis	MsH-2	2-med3	127884	0.246576	oligotroph
	Zwartia lucis	GE-14	3-med4	5	98189.5	0.306266			Planktophila dulcis	MsH-2	7-10xmed2	2.22761e+07	0.588432	oligotroph
	Zwartia lucis	GE-14	3-med4	5	78252.6	0.251358			Planktophila dulcis	MsH-2	8-10xmed3	1.85182e+07	0.492893	oligotroph
	Zwartia lucis	GE-14	3-med4	5	116800	0.39201			Leadbetterella lacustris	RE-19	1-med2	4.18086e+06	1.32557	mesotroph
	Zwartia lucis	GE-14	3-med4	8	2.46807e+06	1.07476			Leadbetterella lacustris	RE-19	1-med2	2.68183e+06	1.15208	mesotroph
	Zwartia lucis	GE-14	3-med4	8	1.89944e+06	1.06312			Leadbetterella lacustris	RE-19	1-med2	3.73061e+06	1.27313	mesotroph
	Zwartia lucis	GE-14	3-med4	8	2.41227e+06	1.00929			Leadbetterella lacustris	RE-19	2-med3	2.20055e+06	1.2395	mesotroph
	Zwartia lucis	GE-14	3-med4	11	5.43341e+06	0.263043			Leadbetterella lacustris	RE-19	2-med3	2.22998e+06	1.17628	mesotroph
	Zwartia lucis	GE-14	3-med4	11	4.20371e+06	0.264802			Leadbetterella lacustris	RE-19	2-med3	2.25194e+06	1.23125	mesotroph
	Zwartia lucis	GE-14	3-med4	11	5.89989e+06	0.298122			Leadbetterella lacustris	RE-19	7-10xmed2	4.81632e+06	1.62441	mesotroph
	Zwartia lucis	GE-14	3-med4	18	1.28816e+07	0.123319			Leadbetterella lacustris	RE-19	7-10xmed2	5.08079e+06	1.63665	mesotroph
	Zwartia lucis	GE-14	3-med4	18	1.29006e+07	0.160186			Leadbetterella lacustris	RE-19	7-10xmed2	4.65884e+06	1.6235	mesotroph
	Zwartia lucis	GE-14	3-med4	18	12721800	0.109769			Leadbetterella lacustris	RE-19	8-10xmed3	4.48606e+06	1.25307	mesotroph
	Zwartia lucis	GE-14	3-med4	21	1.19123e+07	-0.0260774			Leadbetterella lacustris	RE-19	8-10xmed3	8.33472e+06	1.15364	mesotroph
	Zwartia lucis	GE-14	3-med4	21	1.14885e+07	-0.0386408			Leadbetterella lacustris	RE-19	8-10xmed3	1.26592e+06	1.17315	mesotroph
	Zwartia lucis	GE-14	3-med4	21	1.19174e+07	-0.0217734			Leadbetterella lacustris	RE-19	9-10xmed4	3.68194e+07	2.04921	mesotroph
	Zwartia lucis	GE-14	3-med4	25	9.36261e+06	-0.0602117			Leadbetterella lacustris	RE-19	9-10xmed4	3.56851e+07	2.04752	mesotroph
	Zwartia lucis	GE-14	3-med4	25	8.51319e+06	-0.074933			Leadbetterella lacustris	RE-19	9-10xmed4	3.79459e+07	2.05496	mesotroph
	Zwartia lucis	GE-14	3-med4	25	7.81812e+06	-0.105388			Polynucleobacter hoetzingerianus	RE-M21	1-med2	3.78626e+06	1.77195	copiotroph
	Zwartia lucis	GE-14	5-MM	1	24073.7	0.578339			Polynucleobacter hoetzingerianus	RE-M21	1-med2	7.39033e+06	1.17541	copiotroph
	Zwartia lucis	GE-14	5-MM	1	26736.8	0.567847			Polynucleobacter hoetzingerianus	RE-M21	1-med2	7.39033e+06	1.17541	copiotroph
	Zwartia lucis	GE-14	5-MM	1	25684.2	0.571863			Polynucleobacter hoetzingerianus	RE-M21	2-med3	4.09334e+07	1.85425	copiotroph
	Zwartia lucis	GE-14	5-MM	5	93610.5	0.339506			Polynucleobacter hoetzingerianus	RE-M21	2-med3	4.20648e+07	2.00254	copiotroph
	Zwartia lucis	GE-14	5-MM	5	103105	0.337427			Polynucleobacter hoetzingerianus	RE-M21	2-med3	3.99788e+07	2.10969	copiotroph
	Zwartia lucis	GE-14	5-MM	5	125263	0.396135			Polynucleobacter hoetzingerianus	RE-M21	3-med4	55556000	2.22108	copiotroph
	Zwartia lucis	GE-14	5-MM	8	787716	0.709998			Polynucleobacter hoetzingerianus	RE-M21	3-med4	6.86578e+07	2.26657	copiotroph
	Zwartia lucis	GE-14	5-MM	8	659158	0.618404			Polynucleobacter hoetzingerianus	RE-M21	3-med4	6.48929e+07	2.30002	copiotroph
	Zwartia lucis	GE-14	5-MM	8	657305	0.552577			Polynucleobacter hoetzingerianus	RE-M21	7-10xmed2	1.69853e+07	1.47506	copiotroph
	Zwartia lucis	GE-14	5-MM	11	366242	-0.255281			Polynucleobacter hoetzingerianus	RE-M21	7-10xmed2	3.65092e+07	1.98206	copiotroph
	Zwartia lucis	GE-14	5-MM	11	392358	-0.17293			Polynucleobacter hoetzingerianus	RE-M21	7-10xmed2	1.19393e+07	1.78292	copiotroph
	Zwartia lucis	GE-14	5-MM	11	296126	-0.265787			Polynucleobacter hoetzingerianus	RE-M21	8-10xmed3	57662000	2.26767	copiotroph
	Zwartia lucis	GE-14	5-MM	18	606537	0.0720673			Polynucleobacter hoetzingerianus	RE-M21	8-10xmed3	4.81169e+07	2.20891	copiotroph
	Zwartia lucis	GE-14	5-MM	18	611526	0.0633977			Polynucleobacter hoetzingerianus	RE-M21	8-10xmed3	4.11944e+07	2.26798	copiotroph
	Zwartia lucis	GE-14	5-MM	18	564116	0.0920676			Polynucleobacter hoetzingerianus	RE-M21	9-10xmed4	1.60958e+09	2.35557	copiotroph
	Zwartia lucis	GE-14	5-MM	21	412558	-0.128463			Polynucleobacter hoetzingerianus	RE-M21	9-10xmed4	1.72393e+09	2.30605	copiotroph
	Zwartia lucis	GE-14	5-MM	21	331853	-0.203756			Polynucleobacter hoetzingerianus	RE-M21	9-10xmed4	1.35294e+09	2.35777	copiotroph
	Zwartia lucis	GE-14	5-MM	21	583926	0.0115051			Aquidulcibacter rimovensis	RH-10	1-med2	8381200	1.24559	mesotroph
	Zwartia lucis	GE-14	5-MM	25	181189	-0.205708			Aquidulcibacter rimovensis	RH-10	1-med2	7223400	1.2932	mesotroph
	Zwartia lucis	GE-14	5-MM	25	181484	-0.150881			Aquidulcibacter rimovensis	RH-10	1-med2	8.00441e+06	1.31391	mesotroph
	Zwartia lucis	GE-14	5-MM	25	206958	-0.259315			Aquidulcibacter rimovensis	RH-10	2-med3	7.08467e+06	1.36626	mesotroph
	Zwartia lucis	GE-14	6-med2+MM	1	20631.6	0.593769			Aquidulcibacter rimovensis	RH-10	2-med3	8.07579e+06	1.31629	mesotroph
	Zwartia lucis	GE-14	6-med2+MM	1	19505.3	0.599382			Aquidulcibacter rimovensis	RH-10	2-med3	9.03111e+06	1.28462	mesotroph
	Zwartia lucis	GE-14	6-med2+MM	1	16442.1	0.616466			Aquidulcibacter rimovensis	RH-10	3-med4	29219400	1.68791	mesotroph
	Zwartia lucis	GE-14	6-med2+MM	5	12136.8	-0.132644			Aquidulcibacter rimovensis	RH-10	3-med4	18677500	1.81066	mesotroph
	Zwartia lucis	GE-14	6-med2+MM	5	26663.2	0.0781496			Aquidulcibacter rimovensis	RH-10	3-med4	40120200	1.80965	mesotroph
	Zwartia lucis	GE-14	6-med2+MM	5	23442.1	0.0886721			Aquidulcibacter rimovensis	RH-10	7-10xmed2	5.92052e+06	1.12605	mesotroph
	Zwartia lucis	GE-14	6-med2+MM	8	115084	0.749806			Aquidulcibacter rimovensis	RH-10	7-10xmed2	5.43909e+06	1.19488	mesotroph
	Zwartia lucis	GE-14	6-med2+MM	8	128726	0.524802			Aquidulcibacter rimovensis	RH-10	7-10xmed2	6.27661e+06	1.18858	mesotroph
	Zwartia lucis	GE-14	6-med2+MM	8	141053	0.5982			Aquidulcibacter rimovensis	RH-10	8-10xmed3	7.51278e+06	1.34756	mesotroph
	Zwartia lucis	GE-14	6-med2+MM	11	124211	0.0254379			Aquidulcibacter rimovensis	RH-10	8-10xmed3	8.07965e+06	1.47523	mesotroph
	Zwartia lucis	GE-14	6-med2+MM	11	128768	0.000109013			Aquidulcibacter rimovensis	RH-10	8-10xmed3	9123400	1.32564	mesotroph
	Zwartia lucis	GE-14	6-med2+MM	11	163800	0.0498377			Aquidulcibacter rimovensis	RH-10	9-10xmed4	28653800	1.83314	mesotroph
	Zwartia lucis	GE-14	6-med2+MM	18	457947	0.186397			Aquidulcibacter rimovensis	RH-10	9-10xmed4	30281000	1.88501	mesotroph
	Zwartia lucis	GE-14	6-med2+MM	18	508495	0.196206			Aquidulcibacter rimovensis	RH-10	9-10xmed4	38768200	1.84847	mesotroph
	Zwartia lucis	GE-14	6-med2+MM	18	652642	0.197483			Flavobacterium rarum	TH-M1	1-med2	3.01317e+07	4.81476	copiotroph
	Zwartia lucis	GE-14	6-med2+MM	21	322116	-0.117281			Flavobacterium rarum	TH-M1	1-med2	2.69575e+07	4.79645	copiotroph
	Zwartia lucis	GE-14	6-med2+MM	21	317211	-0.157296			Flavobacterium rarum	TH-M1	1-med2	2.95358e+07	4.74384	copiotroph
	Zwartia lucis	GE-14	6-med2+MM	21	544937	-0.0601197			Flavobacterium rarum	TH-M1	2-med3	1.15483e+08	5.40103	copiotroph
	Zwartia lucis	GE-14	6-med2+MM	25	140421	-0.207566			Flavobacterium rarum	TH-M1	2-med3	5.38956e+07	5.43524	copiotroph
	Zwartia lucis	GE-14	6-med2+MM	25	139368	-0.205611			Flavobacterium rarum	TH-M1	2-med3	3.47217e+07	5.30791	copiotroph
	Zwartia lucis	GE-14	6-med2+MM	25	197337	-0.253939			Flavobacterium rarum	TH-M1	3-med4	2.49262e+07	5.90077	copiotroph
	Zwartia lucis	GE-14	7-10xmed2	1	27505.3	0.565013			Flavobacterium rarum	TH-M1	3-med4	3.98585e+07	5.90323	copiotroph
	Zwartia lucis	GE-14	7-10xmed2	1	25263.2	0.573516			Flavobacterium rarum	TH-M1	3-med4	3.33152e+07	5.84248	copiotroph
	Zwartia lucis	GE-14	7-10xmed2	1	24863.2	0.575112			Flavobacterium rarum	TH-M1	7-10xmed2	1.02604e+08	4.78609	copiotroph
	Zwartia lucis	GE-14	7-10xmed2	5	63789.5	0.210303			Flavobacterium rarum	TH-M1	7-10xmed2	4.85679e+07	4.80742	copiotroph
	Zwartia lucis	GE-14	7-10xmed2	5	45652.6	0.147929			Flavobacterium rarum	TH-M1	7-10xmed2	4.49159e+07	4.801	copiotroph
	Zwartia lucis	GE-14	7-10xmed2	5	82568.4	0.30006			Flavobacterium rarum	TH-M1	8-10xmed3	6.68233e+07	4.89581	copiotroph
	Zwartia lucis	GE-14	7-10xmed2	8	2.79494e+06	1.25999			Flavobacterium rarum	TH-M1	8-10xmed3	3.82387e+07	4.95526	copiotroph
	Zwartia lucis	GE-14	7-10xmed2	8	2.47554e+06	1.33105			Flavobacterium rarum	TH-M1	8-10xmed3	4.23737e+07	4.8379	copiotroph
	Zwartia lucis	GE-14	7-10xmed2	8	2.77649e+06	1.17177			Flavobacterium rarum	TH-M1	9-10xmed4	1.58231e+09	6.06803	copiotroph
	Zwartia lucis	GE-14	7-10xmed2	11	3.52028e+06	0.0769107			Flavobacterium rarum	TH-M1	9-10xmed4	4.27693e+08	6.1381	copiotroph
	Zwartia lucis	GE-14	7-10xmed2	11	4.36659e+06	0.189175			Flavobacterium rarum	TH-M1	9-10xmed4	5.91701e+08	6.11828	copiotroph
	Zwartia lucis	GE-14	7-10xmed2	11	3.44344e+06	0.0717608			Planktophila turicensis	ZE-9	1-med2	7.82164e+06	1.33353	oligotroph
	Zwartia lucis	GE-14	7-10xmed2	18	1.07827e+07	0.159914			Planktophila turicensis	ZE-9	1-med2	1.42953e+07	0.813544	oligotroph
	Zwartia lucis	GE-14	7-10xmed2	18	1.1074e+07	0.132946			Planktophila turicensis	ZE-9	1-med2	5.84647e+06	0.488314	oligotroph
	Zwartia lucis	GE-14	7-10xmed2	18	1.16447e+07	0.174055			Planktophila turicensis	ZE-9	2-med3	6.71279e+06	0.881962	oligotroph
	Zwartia lucis	GE-14	7-10xmed2	21	9.52174e+06	-0.0414544			Planktophila turicensis	ZE-9	2-med3	1.28304e+07	0.49226	oligotroph
	Zwartia lucis	GE-14	7-10xmed2	21	8.79818e+06	-0.076686			Planktophila turicensis	ZE-9	2-med3	1.36285e+07	0.765608	oligotroph
	Zwartia lucis	GE-14	7-10xmed2	21	1.27061e+07	0.0290756			Planktophila turicensis	ZE-9	3-med4	38031.6	0.126763	oligotroph
	Zwartia lucis	GE-14	7-10xmed2	25	6.23727e+06	-0.105759			Planktophila turicensis	ZE-9	3-med4	402747	0.759619	oligotroph
	Zwartia lucis	GE-14	7-10xmed2	25	6599800	-0.0718764			Planktophila turicensis	ZE-9	3-med4	27578.9	0.0382833	oligotroph
	Zwartia lucis	GE-14	7-10xmed2	25	6.48043e+06	-0.168323			Planktophila turicensis	ZE-9	7-10xmed2	2.44626e+06	0.576807	oligotroph
	Zwartia lucis	GE-14	8-10xmed3	1	29189.5	0.55907			Planktophila turicensis	ZE-9	7-10xmed2	9.64936e+06	0.83635	oligotroph
	Zwartia lucis	GE-14	8-10xmed3	1	24915.8	0.574901			Planktophila turicensis	ZE-9	7-10xmed2	9.62167e+06	0.354524	oligotroph
	Zwartia lucis	GE-14	8-10xmed3	1	22810.5	0.583729			Planktophila turicensis	ZE-9	8-10xmed3	1.11451e+07	0.317126	oligotroph
	Zwartia lucis	GE-14	8-10xmed3	5	101400	0.311316			Planktophila turicensis	ZE-9	8-10xmed3	1.23646e+07	0.992356	oligotroph
	Zwartia lucis	GE-14	8-10xmed3	5	95105.3	0.334871			Planktophila turicensis	ZE-9	8-10xmed3	1.1863e+07	0.690236	oligotroph
	Zwartia lucis	GE-14	8-10xmed3	5	78663.2	0.309488			Planktophila turicensis	ZE-9	9-10xmed4	34910100	0.651787	oligotroph
	Zwartia lucis	GE-14	8-10xmed3	8	2.63713e+06	1.08612			Planktophila turicensis	ZE-9	9-10xmed4	37114900	1.0282	oligotroph
	Zwartia lucis	GE-14	8-10xmed3	8	2.94337e+06	1.14411			Planktophila turicensis	ZE-9	9-10xmed4	46029000	1.18288	oligotroph
	Zwartia lucis	GE-14	8-10xmed3	8	2.41509e+06	1.14144
	Zwartia lucis	GE-14	8-10xmed3	11	3.06793e+06	0.0504374
	Zwartia lucis	GE-14	8-10xmed3	11	2.43905e+06	-0.0626483
	Zwartia lucis	GE-14	8-10xmed3	11	3.48696e+06	0.12243
	Zwartia lucis	GE-14	8-10xmed3	18	9.79587e+06	0.165851
	Zwartia lucis	GE-14	8-10xmed3	18	9.72114e+06	0.197528
	Zwartia lucis	GE-14	8-10xmed3	18	9.45784e+06	0.142545
	Zwartia lucis	GE-14	8-10xmed3	21	8.66493e+06	-0.0408926
	Zwartia lucis	GE-14	8-10xmed3	21	8.56087e+06	-0.0423668
	Zwartia lucis	GE-14	8-10xmed3	21	1.37878e+07	0.125646
	Zwartia lucis	GE-14	8-10xmed3	25	5.79657e+06	-0.100504
	Zwartia lucis	GE-14	8-10xmed3	25	5.62676e+06	-0.104917
	Zwartia lucis	GE-14	8-10xmed3	25	5.01388e+06	-0.252893
	Zwartia lucis	GE-14	9-10xmed4	1	36210.5	0.537516
	Zwartia lucis	GE-14	9-10xmed4	1	36284.2	0.537313
	Zwartia lucis	GE-14	9-10xmed4	1	31747.4	0.55067
	Zwartia lucis	GE-14	9-10xmed4	5	108705	0.274823
	Zwartia lucis	GE-14	9-10xmed4	5	93684.2	0.237137
	Zwartia lucis	GE-14	9-10xmed4	5	115789	0.323491
	Zwartia lucis	GE-14	9-10xmed4	8	4.72493e+06	1.25732
	Zwartia lucis	GE-14	9-10xmed4	8	4.23908e+06	1.27072
	Zwartia lucis	GE-14	9-10xmed4	8	5.66239e+06	1.29661
	Zwartia lucis	GE-14	9-10xmed4	11	1.12495e+06	-0.478372
	Zwartia lucis	GE-14	9-10xmed4	11	613895	-0.644093
	Zwartia lucis	GE-14	9-10xmed4	11	502421	-0.807388
	Zwartia lucis	GE-14	9-10xmed4	18	1.00593e+08	0.641906
	Zwartia lucis	GE-14	9-10xmed4	18	2.08955e+08	0.832864
	Zwartia lucis	GE-14	9-10xmed4	18	1.01415e+08	0.75822
	Zwartia lucis	GE-14	9-10xmed4	21	8.98312e+07	-0.0377164
	Zwartia lucis	GE-14	9-10xmed4	21	8.20312e+07	-0.311673
	Zwartia lucis	GE-14	9-10xmed4	21	82272000	-0.0697299
	Zwartia lucis	GE-14	9-10xmed4	25	5.97548e+07	-0.10192
	Zwartia lucis	GE-14	9-10xmed4	25	5.15076e+07	-0.116343
	Zwartia lucis	GE-14	9-10xmed4	25	5.45598e+07	-0.102683
	Acidimicobilacustris europeus	KE-4	0-all-media	0	54628.3
	Acidimicobilacustris europeus	KE-4	1-med2	1	64421.1	0.578829
	Acidimicobilacustris europeus	KE-4	1-med2	1	44715.8	0.639682
	Acidimicobilacustris europeus	KE-4	1-med2	1	43326.3	0.644943
	Acidimicobilacustris europeus	KE-4	1-med2	4	56842.1	-0.041721
	Acidimicobilacustris europeus	KE-4	1-med2	4	42000	-0.0208857
	Acidimicobilacustris europeus	KE-4	1-med2	4	42126.3	-0.00936253
	Acidimicobilacustris europeus	KE-4	1-med2	8	235095	0.354928
	Acidimicobilacustris europeus	KE-4	1-med2	8	189211	0.376298
	Acidimicobilacustris europeus	KE-4	1-med2	8	118947	0.259502
	Acidimicobilacustris europeus	KE-4	1-med2	11	383821	0.163396
	Acidimicobilacustris europeus	KE-4	1-med2	11	352547	0.207442
	Acidimicobilacustris europeus	KE-4	1-med2	11	166558	0.112221
	Acidimicobilacustris europeus	KE-4	1-med2	14	735021	0.216574
	Acidimicobilacustris europeus	KE-4	1-med2	14	633905	0.195572
	Acidimicobilacustris europeus	KE-4	1-med2	14	268074	0.15864
	Acidimicobilacustris europeus	KE-4	1-med2	18	1.42934e+06	0.166267
	Acidimicobilacustris europeus	KE-4	1-med2	18	1.53388e+06	0.220915
	Acidimicobilacustris europeus	KE-4	1-med2	18	588442	0.196554
	Acidimicobilacustris europeus	KE-4	1-med2	21	1.87466e+06	0.0904061
	Acidimicobilacustris europeus	KE-4	1-med2	21	913568	-0.172733
	Acidimicobilacustris europeus	KE-4	1-med2	21	765684	0.0877638
	Acidimicobilacustris europeus	KE-4	2-med3	1	36768.4	0.672296
	Acidimicobilacustris europeus	KE-4	2-med3	1	39315.8	0.661132
	Acidimicobilacustris europeus	KE-4	2-med3	1	27926.3	0.718141
	Acidimicobilacustris europeus	KE-4	2-med3	4	45410.5	0.0703682
	Acidimicobilacustris europeus	KE-4	2-med3	4	31505.3	-0.0738239
	Acidimicobilacustris europeus	KE-4	2-med3	4	25684.2	-0.0278977
	Acidimicobilacustris europeus	KE-4	2-med3	8	185337	0.351608
	Acidimicobilacustris europeus	KE-4	2-med3	8	175442	0.429289
	Acidimicobilacustris europeus	KE-4	2-med3	8	116211	0.377382
	Acidimicobilacustris europeus	KE-4	2-med3	11	291716	0.151202
	Acidimicobilacustris europeus	KE-4	2-med3	11	286768	0.163789
	Acidimicobilacustris europeus	KE-4	2-med3	11	190063	0.163984
	Acidimicobilacustris europeus	KE-4	2-med3	14	551326	0.212182
	Acidimicobilacustris europeus	KE-4	2-med3	14	530137	0.20482
	Acidimicobilacustris europeus	KE-4	2-med3	14	358189	0.211235
	Acidimicobilacustris europeus	KE-4	2-med3	18	1.35982e+06	0.225695
	Acidimicobilacustris europeus	KE-4	2-med3	18	1.24914e+06	0.214268
	Acidimicobilacustris europeus	KE-4	2-med3	18	741895	0.182036
	Acidimicobilacustris europeus	KE-4	2-med3	21	2.03363e+06	0.134157
	Acidimicobilacustris europeus	KE-4	2-med3	21	1.57953e+06	0.0782241
	Acidimicobilacustris europeus	KE-4	2-med3	21	978800	0.0923733
	Acidimicobilacustris europeus	KE-4	3-med4	1	32305.3	0.693864
	Acidimicobilacustris europeus	KE-4	3-med4	1	29768.4	0.707495
	Acidimicobilacustris europeus	KE-4	3-med4	1	31768.4	0.696657
	Acidimicobilacustris europeus	KE-4	3-med4	4	94589.5	0.358105
	Acidimicobilacustris europeus	KE-4	3-med4	4	50600	0.176834
	Acidimicobilacustris europeus	KE-4	3-med4	4	84505.3	0.326114
	Acidimicobilacustris europeus	KE-4	3-med4	8	669758	0.489343
	Acidimicobilacustris europeus	KE-4	3-med4	8	603126	0.619544
	Acidimicobilacustris europeus	KE-4	3-med4	8	603726	0.491577
	Acidimicobilacustris europeus	KE-4	3-med4	11	1.49739e+06	0.268187
	Acidimicobilacustris europeus	KE-4	3-med4	11	1.50955e+06	0.305813
	Acidimicobilacustris europeus	KE-4	3-med4	11	1.26545e+06	0.246688
	Acidimicobilacustris europeus	KE-4	3-med4	14	1.95197e+06	0.0883717
	Acidimicobilacustris europeus	KE-4	3-med4	14	2.25207e+06	0.133347
	Acidimicobilacustris europeus	KE-4	3-med4	14	2.13694e+06	0.174648
	Acidimicobilacustris europeus	KE-4	3-med4	18	3.61501e+06	0.154064
	Acidimicobilacustris europeus	KE-4	3-med4	18	5.70714e+06	0.232467
	Acidimicobilacustris europeus	KE-4	3-med4	18	7.58893e+06	0.316829
	Acidimicobilacustris europeus	KE-4	3-med4	21	4.14784e+06	0.0458312
	Acidimicobilacustris europeus	KE-4	3-med4	21	1.81265e+06	-0.382309
	Acidimicobilacustris europeus	KE-4	3-med4	21	2.79486e+06	-0.332969
	Acidimicobilacustris europeus	KE-4	5-MM	1	32421.1	0.693268
	Acidimicobilacustris europeus	KE-4	5-MM	1	33684.2	0.686898
	Acidimicobilacustris europeus	KE-4	5-MM	1	29684.2	0.707967
	Acidimicobilacustris europeus	KE-4	5-MM	4	48347.4	0.133201
	Acidimicobilacustris europeus	KE-4	5-MM	4	13189.5	-0.312537
	Acidimicobilacustris europeus	KE-4	5-MM	4	8557.89	-0.414587
	Acidimicobilacustris europeus	KE-4	5-MM	8	14178.9	-0.306663
	Acidimicobilacustris europeus	KE-4	5-MM	8	11926.3	-0.0251679
	Acidimicobilacustris europeus	KE-4	5-MM	8	7715.79	-0.0258964
	Acidimicobilacustris europeus	KE-4	5-MM	11	6600	-0.254896
	Acidimicobilacustris europeus	KE-4	5-MM	11	6600	-0.197226
	Acidimicobilacustris europeus	KE-4	5-MM	11	5968.42	-0.0855955
	Acidimicobilacustris europeus	KE-4	5-MM	14	4073.68	-0.160841
	Acidimicobilacustris europeus	KE-4	5-MM	14	5473.68	-0.0623726
	Acidimicobilacustris europeus	KE-4	5-MM	14	3157.89	-0.212192
	Acidimicobilacustris europeus	KE-4	5-MM	18	8073.68	0.171016
	Acidimicobilacustris europeus	KE-4	5-MM	18	5336.84	-0.00632945
	Acidimicobilacustris europeus	KE-4	5-MM	18	5126.32	0.12112
	Acidimicobilacustris europeus	KE-4	5-MM	21	11442.1	0.11623
	Acidimicobilacustris europeus	KE-4	5-MM	21	11021.1	0.241724
	Acidimicobilacustris europeus	KE-4	5-MM	21	7326.32	0.119029
	Acidimicobilacustris europeus	KE-4	6-med2+MM	1	25473.7	0.733462
	Acidimicobilacustris europeus	KE-4	6-med2+MM	1	24705.3	0.738567
	Acidimicobilacustris europeus	KE-4	6-med2+MM	1	26105.3	0.72938
	Acidimicobilacustris europeus	KE-4	6-med2+MM	4	2231.58	-0.811646
	Acidimicobilacustris europeus	KE-4	6-med2+MM	4	49263.2	0.230053
	Acidimicobilacustris europeus	KE-4	6-med2+MM	4	15368.4	-0.176607
	Acidimicobilacustris europeus	KE-4	6-med2+MM	8	16494.7	0.500083
	Acidimicobilacustris europeus	KE-4	6-med2+MM	8	13684.2	-0.320233
	Acidimicobilacustris europeus	KE-4	6-med2+MM	8	16557.9	0.018637
	Acidimicobilacustris europeus	KE-4	6-med2+MM	11	12915.8	-0.0815303
	Acidimicobilacustris europeus	KE-4	6-med2+MM	11	10031.6	-0.103502
	Acidimicobilacustris europeus	KE-4	6-med2+MM	11	10452.6	-0.153336
	Acidimicobilacustris europeus	KE-4	6-med2+MM	14	8557.89	-0.137199
	Acidimicobilacustris europeus	KE-4	6-med2+MM	14	8421.05	-0.0583344
	Acidimicobilacustris europeus	KE-4	6-med2+MM	14	7652.63	-0.103935
	Acidimicobilacustris europeus	KE-4	6-med2+MM	18	6389.47	-0.0730506
	Acidimicobilacustris europeus	KE-4	6-med2+MM	18	11231.6	0.0719986
	Acidimicobilacustris europeus	KE-4	6-med2+MM	18	8210.53	0.0175919
	Acidimicobilacustris europeus	KE-4	6-med2+MM	21	10947.4	0.179482
	Acidimicobilacustris europeus	KE-4	6-med2+MM	21	11505.3	0.00802508
	Acidimicobilacustris europeus	KE-4	6-med2+MM	21	10315.8	0.0760862
	Acidimicobilacustris europeus	KE-4	7-10xmed2	1	35789.5	0.676794
	Acidimicobilacustris europeus	KE-4	7-10xmed2	1	32978.9	0.690424
	Acidimicobilacustris europeus	KE-4	7-10xmed2	1	11084.2	0.872149
	Acidimicobilacustris europeus	KE-4	7-10xmed2	4	11652.6	-0.374041
	Acidimicobilacustris europeus	KE-4	7-10xmed2	4	11305.3	-0.356867
	Acidimicobilacustris europeus	KE-4	7-10xmed2	4	14663.2	0.0932722
	Acidimicobilacustris europeus	KE-4	7-10xmed2	8	44915.8	0.337314
	Acidimicobilacustris europeus	KE-4	7-10xmed2	8	39021.1	0.309708
	Acidimicobilacustris europeus	KE-4	7-10xmed2	8	17694.7	0.0469823
	Acidimicobilacustris europeus	KE-4	7-10xmed2	11	48947.4	0.0286521
	Acidimicobilacustris europeus	KE-4	7-10xmed2	11	40294.7	0.0107065
	Acidimicobilacustris europeus	KE-4	7-10xmed2	11	16347.4	-0.0264001
	Acidimicobilacustris europeus	KE-4	7-10xmed2	14	56431.6	0.0474278
	Acidimicobilacustris europeus	KE-4	7-10xmed2	14	51021.1	0.0786725
	Acidimicobilacustris europeus	KE-4	7-10xmed2	14	21400	0.0897747
	Acidimicobilacustris europeus	KE-4	7-10xmed2	18	82242.1	0.0941596
	Acidimicobilacustris europeus	KE-4	7-10xmed2	18	63915.8	0.056332
	Acidimicobilacustris europeus	KE-4	7-10xmed2	18	28000	0.0672034
	Acidimicobilacustris europeus	KE-4	7-10xmed2	21	74694.7	-0.0320859
	Acidimicobilacustris europeus	KE-4	7-10xmed2	21	68073.7	0.0210081
	Acidimicobilacustris europeus	KE-4	7-10xmed2	21	35789.5	0.0818164
	Acidimicobilacustris europeus	KE-4	8-10xmed3	1	35168.4	0.679711
	Acidimicobilacustris europeus	KE-4	8-10xmed3	1	21336.8	0.762997
	Acidimicobilacustris europeus	KE-4	8-10xmed3	1	26663.2	0.725856
	Acidimicobilacustris europeus	KE-4	8-10xmed3	4	44494.7	0.0784075
	Acidimicobilacustris europeus	KE-4	8-10xmed3	4	13968.4	-0.141212
	Acidimicobilacustris europeus	KE-4	8-10xmed3	4	30947.4	0.0496684
	Acidimicobilacustris europeus	KE-4	8-10xmed3	8	152842	0.308509
	Acidimicobilacustris europeus	KE-4	8-10xmed3	8	44978.9	0.292349
	Acidimicobilacustris europeus	KE-4	8-10xmed3	8	79578.9	0.236115
	Acidimicobilacustris europeus	KE-4	8-10xmed3	11	216768	0.116475
	Acidimicobilacustris europeus	KE-4	8-10xmed3	11	54031.6	0.0611247
	Acidimicobilacustris europeus	KE-4	8-10xmed3	11	117116	0.128805
	Acidimicobilacustris europeus	KE-4	8-10xmed3	14	360358	0.169423
	Acidimicobilacustris europeus	KE-4	8-10xmed3	14	72652.6	0.098707
	Acidimicobilacustris europeus	KE-4	8-10xmed3	14	177095	0.137841
	Acidimicobilacustris europeus	KE-4	8-10xmed3	18	820400	0.205674
	Acidimicobilacustris europeus	KE-4	8-10xmed3	18	103442	0.0883306
	Acidimicobilacustris europeus	KE-4	8-10xmed3	18	294000	0.126724
	Acidimicobilacustris europeus	KE-4	8-10xmed3	21	1.17142e+06	0.118727
	Acidimicobilacustris europeus	KE-4	8-10xmed3	21	120074	0.0496978
	Acidimicobilacustris europeus	KE-4	8-10xmed3	21	360800	0.068248
	Acidimicobilacustris europeus	KE-4	9-10xmed4	1	25842.1	0.731069
	Acidimicobilacustris europeus	KE-4	9-10xmed4	1	25610.5	0.732569
	Acidimicobilacustris europeus	KE-4	9-10xmed4	1	38105.3	0.666344
	Acidimicobilacustris europeus	KE-4	9-10xmed4	4	85000	0.396882
	Acidimicobilacustris europeus	KE-4	9-10xmed4	4	64915.8	0.310029
	Acidimicobilacustris europeus	KE-4	9-10xmed4	4	128979	0.406432
	Acidimicobilacustris europeus	KE-4	9-10xmed4	8	670874	0.516482
	Acidimicobilacustris europeus	KE-4	9-10xmed4	8	622421	0.565131
	Acidimicobilacustris europeus	KE-4	9-10xmed4	8	973484	0.505308
	Acidimicobilacustris europeus	KE-4	9-10xmed4	11	1.99932e+06	0.363993
	Acidimicobilacustris europeus	KE-4	9-10xmed4	11	1.95595e+06	0.381671
	Acidimicobilacustris europeus	KE-4	9-10xmed4	11	2.67048e+06	0.336378
	Acidimicobilacustris europeus	KE-4	9-10xmed4	14	4.33623e+06	0.258067
	Acidimicobilacustris europeus	KE-4	9-10xmed4	14	4.72412e+06	0.293935
	Acidimicobilacustris europeus	KE-4	9-10xmed4	14
	Acidimicobilacustris europeus	KE-4	9-10xmed4	18	13563400	0.285092
	Acidimicobilacustris europeus	KE-4	9-10xmed4	18	14687700	0.283582
	Acidimicobilacustris europeus	KE-4	9-10xmed4	18
	Acidimicobilacustris europeus	KE-4	9-10xmed4	21	14142700	0.0139412
	Acidimicobilacustris europeus	KE-4	9-10xmed4	21	15496300	0.0178636
	Acidimicobilacustris europeus	KE-4	9-10xmed4	21
	Pernthalerella lacunae	MaE-M21	0-all-media	0	9726.32
	Pernthalerella lacunae	MaE-M21	1-med2	1	32284.2	0.0900168
	Pernthalerella lacunae	MaE-M21	1-med2	1	45821.1	0.0694189
	Pernthalerella lacunae	MaE-M21	1-med2	1	45189.5	0.0702353
	Pernthalerella lacunae	MaE-M21	1-med2	5
	Pernthalerella lacunae	MaE-M21	1-med2	5	2.86788e+06	1.03415
	Pernthalerella lacunae	MaE-M21	1-med2	5	3.20578e+06	1.06546
	Pernthalerella lacunae	MaE-M21	1-med2	8	7.36841e+06
	Pernthalerella lacunae	MaE-M21	1-med2	8	7.03794e+06	0.299247
	Pernthalerella lacunae	MaE-M21	1-med2	8	8.73136e+06	0.333989
	Pernthalerella lacunae	MaE-M21	1-med2	11	6.05545e+06	-0.0654143
	Pernthalerella lacunae	MaE-M21	1-med2	11	6.26562e+06	-0.0387458
	Pernthalerella lacunae	MaE-M21	1-med2	11	6.32555e+06	-0.107441
	Pernthalerella lacunae	MaE-M21	1-med2	18	1.44394e+07	0.124143
	Pernthalerella lacunae	MaE-M21	1-med2	18	1.61053e+07	0.134867
	Pernthalerella lacunae	MaE-M21	1-med2	18	1.77342e+07	0.147271
	Pernthalerella lacunae	MaE-M21	1-med2	21	1.27656e+07	-0.0410687
	Pernthalerella lacunae	MaE-M21	1-med2	21	1.30043e+07	-0.0712883
	Pernthalerella lacunae	MaE-M21	1-med2	21	1.48568e+07	-0.0590117
	Pernthalerella lacunae	MaE-M21	1-med2	25	1.07533e+07	-0.0428858
	Pernthalerella lacunae	MaE-M21	1-med2	25	1.41244e+07	0.020656
	Pernthalerella lacunae	MaE-M21	1-med2	25	1.41025e+07	-0.0130266
	Pernthalerella lacunae	MaE-M21	2-med3	1	36915.8	0.0821309
	Pernthalerella lacunae	MaE-M21	2-med3	1	34873.7	0.0854783
	Pernthalerella lacunae	MaE-M21	2-med3	1	31157.9	0.0921057
	Pernthalerella lacunae	MaE-M21	2-med3	5	3.28856e+06	1.12239
	Pernthalerella lacunae	MaE-M21	2-med3	5	3.13082e+06	1.12433
	Pernthalerella lacunae	MaE-M21	2-med3	5	3.61195e+06	1.18823
	Pernthalerella lacunae	MaE-M21	2-med3	8	6.64539e+06	0.234491
	Pernthalerella lacunae	MaE-M21	2-med3	8	6.05636e+06	0.219938
	Pernthalerella lacunae	MaE-M21	2-med3	8	6.14212e+06	0.176974
	Pernthalerella lacunae	MaE-M21	2-med3	11	7.41663e+06	0.0366006
	Pernthalerella lacunae	MaE-M21	2-med3	11	6.45221e+06	0.0211047
	Pernthalerella lacunae	MaE-M21	2-med3	11	5.69926e+06	-0.0249441
	Pernthalerella lacunae	MaE-M21	2-med3	18	1.38582e+07	0.0893076
	Pernthalerella lacunae	MaE-M21	2-med3	18	1.50515e+07	0.121008
	Pernthalerella lacunae	MaE-M21	2-med3	18	1.41842e+07	0.130256
	Pernthalerella lacunae	MaE-M21	2-med3	21	1.44652e+07	0.0142883
	Pernthalerella lacunae	MaE-M21	2-med3	21	1.35713e+07	-0.0345071
	Pernthalerella lacunae	MaE-M21	2-med3	21	1.13347e+07	-0.0747524
	Pernthalerella lacunae	MaE-M21	2-med3	25	9.08495e+06	-0.116281
	Pernthalerella lacunae	MaE-M21	2-med3	25	1.07889e+07	-0.0573581
	Pernthalerella lacunae	MaE-M21	2-med3	25	1.16948e+07	0.00781896
	Pernthalerella lacunae	MaE-M21	3-med4	1	57684.2	0.0558753
	Pernthalerella lacunae	MaE-M21	3-med4	1	45052.6	0.0704137
	Pernthalerella lacunae	MaE-M21	3-med4	1	43684.2	0.0722281
	Pernthalerella lacunae	MaE-M21	3-med4	5	5.99511e+06	1.16093
	Pernthalerella lacunae	MaE-M21	3-med4	5	5.40738e+06	1.19692
	Pernthalerella lacunae	MaE-M21	3-med4	5	6419000	1.24751
	Pernthalerella lacunae	MaE-M21	3-med4	8	1.06086e+07	0.190242
	Pernthalerella lacunae	MaE-M21	3-med4	8	1.27554e+07	0.286063
	Pernthalerella lacunae	MaE-M21	3-med4	8	1.35792e+07	0.249758
	Pernthalerella lacunae	MaE-M21	3-med4	11	6066000	-0.186323
	Pernthalerella lacunae	MaE-M21	3-med4	11	6.15579e+06	-0.242853
	Pernthalerella lacunae	MaE-M21	3-med4	11	6.22042e+06	-0.260233
	Pernthalerella lacunae	MaE-M21	3-med4	18	683474	-0.311895
	Pernthalerella lacunae	MaE-M21	3-med4	18	1.47814e+07	0.125139
	Pernthalerella lacunae	MaE-M21	3-med4	18	1.29721e+07	0.104995
	Pernthalerella lacunae	MaE-M21	3-med4	21	1.07628e+07	0.918889
	Pernthalerella lacunae	MaE-M21	3-med4	21	9.20042e+06	-0.158039
	Pernthalerella lacunae	MaE-M21	3-med4	21	1.01347e+07	-0.0822775
	Pernthalerella lacunae	MaE-M21	3-med4	25	10652000	-0.002588
	Pernthalerella lacunae	MaE-M21	3-med4	25	8.04495e+06	-0.0335513
	Pernthalerella lacunae	MaE-M21	3-med4	25	8.97063e+06	-0.0305032
	Pernthalerella lacunae	MaE-M21	5-MM	1	41063.2	0.0758678
	Pernthalerella lacunae	MaE-M21	5-MM	1	57547.4	0.0560151
	Pernthalerella lacunae	MaE-M21	5-MM	1	33400	0.0880181
	Pernthalerella lacunae	MaE-M21	5-MM	5	86600	0.186547
	Pernthalerella lacunae	MaE-M21	5-MM	5	83157.9	0.0920332
	Pernthalerella lacunae	MaE-M21	5-MM	5	40073.7	0.045541
	Pernthalerella lacunae	MaE-M21	5-MM	8	183168	0.249702
	Pernthalerella lacunae	MaE-M21	5-MM	8	163516	0.225389
	Pernthalerella lacunae	MaE-M21	5-MM	8	173474	0.488435
	Pernthalerella lacunae	MaE-M21	5-MM	11	111863	-0.164377
	Pernthalerella lacunae	MaE-M21	5-MM	11	148937	-0.0311291
	Pernthalerella lacunae	MaE-M21	5-MM	11	131442	-0.0924865
	Pernthalerella lacunae	MaE-M21	5-MM	18	411042	0.185917
	Pernthalerella lacunae	MaE-M21	5-MM	18	401211	0.141566
	Pernthalerella lacunae	MaE-M21	5-MM	18	419116	0.165654
	Pernthalerella lacunae	MaE-M21	5-MM	21	413400	0.00190666
	Pernthalerella lacunae	MaE-M21	5-MM	21	446747	0.0358357
	Pernthalerella lacunae	MaE-M21	5-MM	21	446526	0.021117
	Pernthalerella lacunae	MaE-M21	5-MM	25	385821	-0.0172605
	Pernthalerella lacunae	MaE-M21	5-MM	25	383442	-0.0382012
	Pernthalerella lacunae	MaE-M21	5-MM	25	345895	-0.063841
	Pernthalerella lacunae	MaE-M21	6-med2+MM	1	24421.1	0.106436
	Pernthalerella lacunae	MaE-M21	6-med2+MM	1	23926.3	0.10764
	Pernthalerella lacunae	MaE-M21	6-med2+MM	1	23442.1	0.108843
	Pernthalerella lacunae	MaE-M21	6-med2+MM	5	192316	0.515923
	Pernthalerella lacunae	MaE-M21	6-med2+MM	5	266126	0.602248
	Pernthalerella lacunae	MaE-M21	6-med2+MM	5	239232	0.580725
	Pernthalerella lacunae	MaE-M21	6-med2+MM	8	1294400	0.635555
	Pernthalerella lacunae	MaE-M21	6-med2+MM	8	1.85702e+06	0.647586
	Pernthalerella lacunae	MaE-M21	6-med2+MM	8	2.39011e+06	0.76722
	Pernthalerella lacunae	MaE-M21	6-med2+MM	11	1.56071e+06	0.0623635
	Pernthalerella lacunae	MaE-M21	6-med2+MM	11	1.88857e+06	0.00561516
	Pernthalerella lacunae	MaE-M21	6-med2+MM	11	2.03382e+06	-0.053807
	Pernthalerella lacunae	MaE-M21	6-med2+MM	18	6.29089e+06	0.199138
	Pernthalerella lacunae	MaE-M21	6-med2+MM	18	6.64635e+06	0.17975
	Pernthalerella lacunae	MaE-M21	6-med2+MM	18	7.64158e+06	0.189098
	Pernthalerella lacunae	MaE-M21	6-med2+MM	21	5.29787e+06	-0.0572659
	Pernthalerella lacunae	MaE-M21	6-med2+MM	21	5.95574e+06	-0.0365708
	Pernthalerella lacunae	MaE-M21	6-med2+MM	21	5.96029e+06	-0.0828281
	Pernthalerella lacunae	MaE-M21	6-med2+MM	25	3332000	-0.115933
	Pernthalerella lacunae	MaE-M21	6-med2+MM	25	4.06492e+06	-0.0954905
	Pernthalerella lacunae	MaE-M21	6-med2+MM	25	3.94528e+06	-0.10315
	Pernthalerella lacunae	MaE-M21	7-10xmed2	1	37263.2	0.08158
	Pernthalerella lacunae	MaE-M21	7-10xmed2	1	34505.3	0.0861031
	Pernthalerella lacunae	MaE-M21	7-10xmed2	1	36494.7	0.0828057
	Pernthalerella lacunae	MaE-M21	7-10xmed2	5	8.49122e+06	1.3572
	Pernthalerella lacunae	MaE-M21	7-10xmed2	5	9.84659e+06	1.41344
	Pernthalerella lacunae	MaE-M21	7-10xmed2	5	1.05802e+07	1.41739
	Pernthalerella lacunae	MaE-M21	7-10xmed2	8	6.75018e+06	-0.0764879
	Pernthalerella lacunae	MaE-M21	7-10xmed2	8	7.66422e+06	-0.0835208
	Pernthalerella lacunae	MaE-M21	7-10xmed2	8	8.09769e+06	-0.0891356
	Pernthalerella lacunae	MaE-M21	7-10xmed2	11	8.55084e+06	0.0788203
	Pernthalerella lacunae	MaE-M21	7-10xmed2	11	8.58811e+06	0.0379384
	Pernthalerella lacunae	MaE-M21	7-10xmed2	11	1.07284e+07	0.0937723
	Pernthalerella lacunae	MaE-M21	7-10xmed2	18	2.07053e+07	0.126337
	Pernthalerella lacunae	MaE-M21	7-10xmed2	18	2.18481e+07	0.133391
	Pernthalerella lacunae	MaE-M21	7-10xmed2	18	2.31684e+07	0.109985
	Pernthalerella lacunae	MaE-M21	7-10xmed2	21	1.62457e+07	-0.0808535
	Pernthalerella lacunae	MaE-M21	7-10xmed2	21	1.75398e+07	-0.0732141
	Pernthalerella lacunae	MaE-M21	7-10xmed2	21	2.24352e+07	-0.0107203
	Pernthalerella lacunae	MaE-M21	7-10xmed2	25	1.58836e+07	-0.00563537
	Pernthalerella lacunae	MaE-M21	7-10xmed2	25	1.85355e+07	0.0138036
	Pernthalerella lacunae	MaE-M21	7-10xmed2	25	1.58576e+07	-0.0867454
	Pernthalerella lacunae	MaE-M21	8-10xmed3	1	39578.9	0.0780333
	Pernthalerella lacunae	MaE-M21	8-10xmed3	1	38252.6	0.0800383
	Pernthalerella lacunae	MaE-M21	8-10xmed3	1	33621.1	0.0876301
	Pernthalerella lacunae	MaE-M21	8-10xmed3	5	3.75994e+06	1.13847
	Pernthalerella lacunae	MaE-M21	8-10xmed3	5	3.42542e+06	1.12369
	Pernthalerella lacunae	MaE-M21	8-10xmed3	5	3.90309e+06	1.18859
	Pernthalerella lacunae	MaE-M21	8-10xmed3	8	5.15593e+06	0.105248
	Pernthalerella lacunae	MaE-M21	8-10xmed3	8	5.12774e+06	0.13448
	Pernthalerella lacunae	MaE-M21	8-10xmed3	8	5.77974e+06	0.130863
	Pernthalerella lacunae	MaE-M21	8-10xmed3	11	5.02263e+06	-0.00873093
	Pernthalerella lacunae	MaE-M21	8-10xmed3	11	5332000	0.0130207
	Pernthalerella lacunae	MaE-M21	8-10xmed3	11	5.82811e+06	0.00277793
	Pernthalerella lacunae	MaE-M21	8-10xmed3	18	1.45983e+07	0.152422
	Pernthalerella lacunae	MaE-M21	8-10xmed3	18	1.26653e+07	0.123591
	Pernthalerella lacunae	MaE-M21	8-10xmed3	18	1.54807e+07	0.139558
	Pernthalerella lacunae	MaE-M21	8-10xmed3	21	1.07558e+07	-0.101821
	Pernthalerella lacunae	MaE-M21	8-10xmed3	21	1.31713e+07	0.0130581
	Pernthalerella lacunae	MaE-M21	8-10xmed3	21	1.27279e+07	-0.0652668
	Pernthalerella lacunae	MaE-M21	8-10xmed3	25	1.01426e+07	-0.0146742
	Pernthalerella lacunae	MaE-M21	8-10xmed3	25	9930000	-0.0706192
	Pernthalerella lacunae	MaE-M21	8-10xmed3	25	1.05081e+07	-0.0479123
	Pernthalerella lacunae	MaE-M21	9-10xmed4	1	66073.7	0.0478879
	Pernthalerella lacunae	MaE-M21	9-10xmed4	1	83747.4	0.0339447
	Pernthalerella lacunae	MaE-M21	9-10xmed4	1	64421.1	0.0493779
	Pernthalerella lacunae	MaE-M21	9-10xmed4	5	1.4331e+07	1.34485
	Pernthalerella lacunae	MaE-M21	9-10xmed4	5	1.61897e+07	1.31608
	Pernthalerella lacunae	MaE-M21	9-10xmed4	5	1.50606e+07	1.3636
	Pernthalerella lacunae	MaE-M21	9-10xmed4	8	2.90019e+07	0.234978
	Pernthalerella lacunae	MaE-M21	9-10xmed4	8	2.53607e+07	0.149608
	Pernthalerella lacunae	MaE-M21	9-10xmed4	8	2.92724e+07	0.221521
	Pernthalerella lacunae	MaE-M21	9-10xmed4	11	1.02428e+07	-0.346927
	Pernthalerella lacunae	MaE-M21	9-10xmed4	11	1.07895e+07	-0.284877
	Pernthalerella lacunae	MaE-M21	9-10xmed4	11	1.22671e+07	-0.28991
	Pernthalerella lacunae	MaE-M21	9-10xmed4	18	2.38197e+07	0.120562
	Pernthalerella lacunae	MaE-M21	9-10xmed4	18	2.13692e+07	0.0976254
	Pernthalerella lacunae	MaE-M21	9-10xmed4	18	2.20283e+07	0.0836302
	Pernthalerella lacunae	MaE-M21	9-10xmed4	21	1.73892e+07	-0.104888
	Pernthalerella lacunae	MaE-M21	9-10xmed4	21	1.79124e+07	-0.0588181
	Pernthalerella lacunae	MaE-M21	9-10xmed4	21	1.75671e+07	-0.0754345
	Pernthalerella lacunae	MaE-M21	9-10xmed4	25	1.73517e+07	-0.000539332
	Pernthalerella lacunae	MaE-M21	9-10xmed4	25	1.70674e+07	-0.0120815
	Pernthalerella lacunae	MaE-M21	9-10xmed4	25	2.03221e+07	0.036421
	Limnohabitans kasalickyi	MaE-M4	0-all-media	0	11833.5
	Limnohabitans kasalickyi	MaE-M4	1-med2	1	149842	2.53865
	Limnohabitans kasalickyi	MaE-M4	1-med2	1	137053	2.44943
	Limnohabitans kasalickyi	MaE-M4	1-med2	1	91926.3	2.05005
	Limnohabitans kasalickyi	MaE-M4	1-med2	3
	Limnohabitans kasalickyi	MaE-M4	1-med2	3	2.07822e+06	1.35945
	Limnohabitans kasalickyi	MaE-M4	1-med2	3	2.01348e+06	1.54332
	Limnohabitans kasalickyi	MaE-M4	1-med2	7	4.35436e+06
	Limnohabitans kasalickyi	MaE-M4	1-med2	7	4.09321e+06	0.169454
	Limnohabitans kasalickyi	MaE-M4	1-med2	7	4.81511e+06	0.217973
	Limnohabitans kasalickyi	MaE-M4	1-med2	10	5.02007e+06	0.0474225
	Limnohabitans kasalickyi	MaE-M4	1-med2	10	5.14965e+06	0.0765332
	Limnohabitans kasalickyi	MaE-M4	1-med2	10	4.90797e+06	0.0063674
	Limnohabitans kasalickyi	MaE-M4	1-med2	14	5.89241e+06	0.0400551
	Limnohabitans kasalickyi	MaE-M4	1-med2	14	5750400	0.027585
	Limnohabitans kasalickyi	MaE-M4	1-med2	14	4.61939e+06	-0.0151494
	Limnohabitans kasalickyi	MaE-M4	1-med2	17	8.06036e+06	0.104431
	Limnohabitans kasalickyi	MaE-M4	1-med2	17	7425400	0.0852124
	Limnohabitans kasalickyi	MaE-M4	1-med2	17	7.02498e+06	0.139737
	Limnohabitans kasalickyi	MaE-M4	2-med3	1	69621.1	1.77213
	Limnohabitans kasalickyi	MaE-M4	2-med3	1	122958	2.34091
	Limnohabitans kasalickyi	MaE-M4	2-med3	1	115653	2.27966
	Limnohabitans kasalickyi	MaE-M4	2-med3	3	6.94599e+06	2.30143
	Limnohabitans kasalickyi	MaE-M4	2-med3	3	2697800	1.54417
	Limnohabitans kasalickyi	MaE-M4	2-med3	3	2999600	1.62782
	Limnohabitans kasalickyi	MaE-M4	2-med3	7	1.01288e+07	0.0943054
	Limnohabitans kasalickyi	MaE-M4	2-med3	7	4.84949e+06	0.146609
	Limnohabitans kasalickyi	MaE-M4	2-med3	7	4.73057e+06	0.113892
	Limnohabitans kasalickyi	MaE-M4	2-med3	10	1.26231e+07	0.0733799
	Limnohabitans kasalickyi	MaE-M4	2-med3	10	5.36579e+06	0.033723
	Limnohabitans kasalickyi	MaE-M4	2-med3	10	5.08242e+06	0.0239141
	Limnohabitans kasalickyi	MaE-M4	2-med3	14	1.1627e+07	-0.0205491
	Limnohabitans kasalickyi	MaE-M4	2-med3	14	5.32899e+06	-0.00172047
	Limnohabitans kasalickyi	MaE-M4	2-med3	14	5.63113e+06	0.0256304
	Limnohabitans kasalickyi	MaE-M4	2-med3	17	1.48163e+07	0.0808
	Limnohabitans kasalickyi	MaE-M4	2-med3	17	7.62819e+06	0.119563
	Limnohabitans kasalickyi	MaE-M4	2-med3	17	6.70487e+06	0.0581751
	Limnohabitans kasalickyi	MaE-M4	3-med4	1	42178.9	1.27099
	Limnohabitans kasalickyi	MaE-M4	3-med4	1	40073.7	1.21979
	Limnohabitans kasalickyi	MaE-M4	3-med4	1	40284.2	1.22503
	Limnohabitans kasalickyi	MaE-M4	3-med4	3	2.51404e+06	2.04386
	Limnohabitans kasalickyi	MaE-M4	3-med4	3	2.24221e+06	2.01225
	Limnohabitans kasalickyi	MaE-M4	3-med4	3	2.19335e+06	1.99861
	Limnohabitans kasalickyi	MaE-M4	3-med4	7	3.80032e+06	0.103298
	Limnohabitans kasalickyi	MaE-M4	3-med4	7	3.22146e+06	0.0905934
	Limnohabitans kasalickyi	MaE-M4	3-med4	7	3.26539e+06	0.0994875
	Limnohabitans kasalickyi	MaE-M4	3-med4	10	5.10488e+06	0.0983712
	Limnohabitans kasalickyi	MaE-M4	3-med4	10	4.76838e+06	0.130724
	Limnohabitans kasalickyi	MaE-M4	3-med4	10	3.63405e+06	0.0356565
	Limnohabitans kasalickyi	MaE-M4	3-med4	14	6.51377e+06	0.0609301
	Limnohabitans kasalickyi	MaE-M4	3-med4	14	5.93481e+06	0.0547072
	Limnohabitans kasalickyi	MaE-M4	3-med4	14	4.51986e+06	0.0545333
	Limnohabitans kasalickyi	MaE-M4	3-med4	17	7.87371e+06	0.0632035
	Limnohabitans kasalickyi	MaE-M4	3-med4	17	6.86978e+06	0.0487656
	Limnohabitans kasalickyi	MaE-M4	3-med4	17	5.68937e+06	0.0767058
	Limnohabitans kasalickyi	MaE-M4	5-MM	1	22884.2	0.659514
	Limnohabitans kasalickyi	MaE-M4	5-MM	1	25052.6	0.750046
	Limnohabitans kasalickyi	MaE-M4	5-MM	1	22526.3	0.643751
	Limnohabitans kasalickyi	MaE-M4	5-MM	3	19863.2	-0.0707903
	Limnohabitans kasalickyi	MaE-M4	5-MM	3	20347.4	-0.104014
	Limnohabitans kasalickyi	MaE-M4	5-MM	3	18873.7	-0.0884578
	Limnohabitans kasalickyi	MaE-M4	5-MM	7	26747.4	0.0743924
	Limnohabitans kasalickyi	MaE-M4	5-MM	7	25063.2	0.0521118
	Limnohabitans kasalickyi	MaE-M4	5-MM	7	24768.4	0.0679502
	Limnohabitans kasalickyi	MaE-M4	5-MM	10	11084.2	-0.293638
	Limnohabitans kasalickyi	MaE-M4	5-MM	10	8715.79	-0.352088
	Limnohabitans kasalickyi	MaE-M4	5-MM	10	1.54272e+06	1.37724
	Limnohabitans kasalickyi	MaE-M4	5-MM	14	8705.26	-0.0603985
	Limnohabitans kasalickyi	MaE-M4	5-MM	14	6242.11	-0.0834547
	Limnohabitans kasalickyi	MaE-M4	5-MM	14	107368	-0.666258
	Limnohabitans kasalickyi	MaE-M4	5-MM	17	10031.6	0.0472701
	Limnohabitans kasalickyi	MaE-M4	5-MM	17	7442.11	0.0586121
	Limnohabitans kasalickyi	MaE-M4	5-MM	17	287158	0.327922
	Limnohabitans kasalickyi	MaE-M4	6-med2+MM	1	86947.4	1.99437
	Limnohabitans kasalickyi	MaE-M4	6-med2+MM	1	79084.2	1.89958
	Limnohabitans kasalickyi	MaE-M4	6-med2+MM	1	71589.5	1.80002
	Limnohabitans kasalickyi	MaE-M4	6-med2+MM	3	2.74423e+06	1.72598
	Limnohabitans kasalickyi	MaE-M4	6-med2+MM	3	2.33418e+06	1.69245
	Limnohabitans kasalickyi	MaE-M4	6-med2+MM	3	2.55189e+06	1.78682
	Limnohabitans kasalickyi	MaE-M4	6-med2+MM	7	5.53518e+06	0.175406
	Limnohabitans kasalickyi	MaE-M4	6-med2+MM	7	4.65532e+06	0.172587
	Limnohabitans kasalickyi	MaE-M4	6-med2+MM	7	5.04312e+06	0.170297
	Limnohabitans kasalickyi	MaE-M4	6-med2+MM	10	7.10674e+06	0.0833064
	Limnohabitans kasalickyi	MaE-M4	6-med2+MM	10	6.13666e+06	0.0920905
	Limnohabitans kasalickyi	MaE-M4	6-med2+MM	10	6.71519e+06	0.0954493
	Limnohabitans kasalickyi	MaE-M4	6-med2+MM	14	6.76902e+06	-0.0121717
	Limnohabitans kasalickyi	MaE-M4	6-med2+MM	14	6.17851e+06	0.00169881
	Limnohabitans kasalickyi	MaE-M4	6-med2+MM	14	6.21283e+06	-0.0194388
	Limnohabitans kasalickyi	MaE-M4	6-med2+MM	17	8.21089e+06	0.0643685
	Limnohabitans kasalickyi	MaE-M4	6-med2+MM	17	7.32043e+06	0.056531
	Limnohabitans kasalickyi	MaE-M4	6-med2+MM	17	7.78218e+06	0.0750732
	Limnohabitans kasalickyi	MaE-M4	7-10xmed2	1	88768.4	2.0151
	Limnohabitans kasalickyi	MaE-M4	7-10xmed2	1	91442.1	2.04477
	Limnohabitans kasalickyi	MaE-M4	7-10xmed2	1	74810.5	1.84403
	Limnohabitans kasalickyi	MaE-M4	7-10xmed2	3	2.95503e+06	1.75262
	Limnohabitans kasalickyi	MaE-M4	7-10xmed2	3	2.78562e+06	1.70826
	Limnohabitans kasalickyi	MaE-M4	7-10xmed2	3	2075000	1.66138
	Limnohabitans kasalickyi	MaE-M4	7-10xmed2	7	4.86289e+06	0.124531
	Limnohabitans kasalickyi	MaE-M4	7-10xmed2	7	5.54075e+06	0.171915
	Limnohabitans kasalickyi	MaE-M4	7-10xmed2	7	5.23792e+06	0.231491
	Limnohabitans kasalickyi	MaE-M4	7-10xmed2	10	5.39106e+06	0.0343696
	Limnohabitans kasalickyi	MaE-M4	7-10xmed2	10	5.93375e+06	0.0228422
	Limnohabitans kasalickyi	MaE-M4	7-10xmed2	10	5.09591e+06	-0.00916211
	Limnohabitans kasalickyi	MaE-M4	7-10xmed2	14	6.76859e+06	0.0568875
	Limnohabitans kasalickyi	MaE-M4	7-10xmed2	14	5.92614e+06	-0.000320852
	Limnohabitans kasalickyi	MaE-M4	7-10xmed2	14	6273000	0.0519543
	Limnohabitans kasalickyi	MaE-M4	7-10xmed2	17	8.95774e+06	0.0934083
	Limnohabitans kasalickyi	MaE-M4	7-10xmed2	17	7.87876e+06	0.0949326
	Limnohabitans kasalickyi	MaE-M4	7-10xmed2	17	8.54228e+06	0.102925
	Limnohabitans kasalickyi	MaE-M4	8-10xmed3	1	28210.5	0.868762
	Limnohabitans kasalickyi	MaE-M4	8-10xmed3	1	27231.6	0.833445
	Limnohabitans kasalickyi	MaE-M4	8-10xmed3	1	30115.8	0.934117
	Limnohabitans kasalickyi	MaE-M4	8-10xmed3	3	2.18663e+06	2.17521
	Limnohabitans kasalickyi	MaE-M4	8-10xmed3	3	1.80757e+06	2.09768
	Limnohabitans kasalickyi	MaE-M4	8-10xmed3	3	2138200	2.13134
	Limnohabitans kasalickyi	MaE-M4	8-10xmed3	7	3.22471e+06	0.0971198
	Limnohabitans kasalickyi	MaE-M4	8-10xmed3	7	3.45074e+06	0.161651
	Limnohabitans kasalickyi	MaE-M4	8-10xmed3	7	2.99868e+06	0.0845523
	Limnohabitans kasalickyi	MaE-M4	8-10xmed3	10	4.19603e+06	0.0877659
	Limnohabitans kasalickyi	MaE-M4	8-10xmed3	10	4.14103e+06	0.0607857
	Limnohabitans kasalickyi	MaE-M4	8-10xmed3	10	3.93871e+06	0.0908928
	Limnohabitans kasalickyi	MaE-M4	8-10xmed3	14	4.14296e+06	-0.0031823
	Limnohabitans kasalickyi	MaE-M4	8-10xmed3	14	3.82633e+06	-0.0197599
	Limnohabitans kasalickyi	MaE-M4	8-10xmed3	14	4.23748e+06	0.0182794
	Limnohabitans kasalickyi	MaE-M4	8-10xmed3	17	5.70509e+06	0.10665
	Limnohabitans kasalickyi	MaE-M4	8-10xmed3	17	6.73007e+06	0.188227
	Limnohabitans kasalickyi	MaE-M4	8-10xmed3	17	5.48897e+06	0.0862569
	Limnohabitans kasalickyi	MaE-M4	9-10xmed4	1	73052.6	1.82025
	Limnohabitans kasalickyi	MaE-M4	9-10xmed4	1	68842.1	1.76088
	Limnohabitans kasalickyi	MaE-M4	9-10xmed4	1	78389.5	1.89076
	Limnohabitans kasalickyi	MaE-M4	9-10xmed4	3	1.65468e+07	2.71139
	Limnohabitans kasalickyi	MaE-M4	9-10xmed4	3	1.59228e+07	2.72185
	Limnohabitans kasalickyi	MaE-M4	9-10xmed4	3	1.45478e+07	2.61175
	Limnohabitans kasalickyi	MaE-M4	9-10xmed4	7	1.23835e+08	0.503189
	Limnohabitans kasalickyi	MaE-M4	9-10xmed4	7	1.60821e+08	0.578135
	Limnohabitans kasalickyi	MaE-M4	9-10xmed4	7	1.09037e+08	0.503562
	Limnohabitans kasalickyi	MaE-M4	9-10xmed4	10	1.37878e+08	0.035806
	Limnohabitans kasalickyi	MaE-M4	9-10xmed4	10	1.70577e+08	0.0196308
	Limnohabitans kasalickyi	MaE-M4	9-10xmed4	10	4.73125e+08	0.489225
	Limnohabitans kasalickyi	MaE-M4	9-10xmed4	14	79380000	-0.138031
	Limnohabitans kasalickyi	MaE-M4	9-10xmed4	14	8.90589e+07	-0.162472
	Limnohabitans kasalickyi	MaE-M4	9-10xmed4	14	1.40575e+08	-0.303405
	Limnohabitans kasalickyi	MaE-M4	9-10xmed4	17	1.63558e+08	0.240974
	Limnohabitans kasalickyi	MaE-M4	9-10xmed4	17	4.58042e+07	-0.221641
	Limnohabitans kasalickyi	MaE-M4	9-10xmed4	17	6.71537e+07	-0.246252
	Sphingobium cupriresistens	MiE-4	0-all-media	0	13883.3
	Sphingobium cupriresistens	MiE-4	1-med2	1	26526.3	0.647451
	Sphingobium cupriresistens	MiE-4	1-med2	1	17410.5	0.226389
	Sphingobium cupriresistens	MiE-4	1-med2	1	18600	0.292475
	Sphingobium cupriresistens	MiE-4	1-med2	3	235021	1.09077
	Sphingobium cupriresistens	MiE-4	1-med2	3	132368	1.01426
	Sphingobium cupriresistens	MiE-4	1-med2	3	118179	0.924519
	Sphingobium cupriresistens	MiE-4	1-med2	7	1.93496e+06	0.527041
	Sphingobium cupriresistens	MiE-4	1-med2	7	1806200	0.653348
	Sphingobium cupriresistens	MiE-4	1-med2	7	1.92502e+06	0.697623
	Sphingobium cupriresistens	MiE-4	1-med2	10	4.14979e+06	0.254324
	Sphingobium cupriresistens	MiE-4	1-med2	10	4.39313e+06	0.296272
	Sphingobium cupriresistens	MiE-4	1-med2	10	3.70093e+06	0.217882
	Sphingobium cupriresistens	MiE-4	1-med2	14	6.38439e+06	0.1077
	Sphingobium cupriresistens	MiE-4	1-med2	14	6.21363e+06	0.0866761
	Sphingobium cupriresistens	MiE-4	1-med2	14	6.27155e+06	0.13186
	Sphingobium cupriresistens	MiE-4	1-med2	17	6.24837e+06	-0.0071785
	Sphingobium cupriresistens	MiE-4	1-med2	17	6.24994e+06	0.00194195
	Sphingobium cupriresistens	MiE-4	1-med2	17	4.60888e+06	-0.102679
	Sphingobium cupriresistens	MiE-4	2-med3	1	14810.5	0.0646517
	Sphingobium cupriresistens	MiE-4	2-med3	1	15157.9	0.0878351
	Sphingobium cupriresistens	MiE-4	2-med3	1	14031.6	0.010624
	Sphingobium cupriresistens	MiE-4	2-med3	3	77557.9	0.827843
	Sphingobium cupriresistens	MiE-4	2-med3	3	93894.7	0.911826
	Sphingobium cupriresistens	MiE-4	2-med3	3	108663	1.02347
	Sphingobium cupriresistens	MiE-4	2-med3	7	2.35257e+06	0.85306
	Sphingobium cupriresistens	MiE-4	2-med3	7	2.00583e+06	0.76541
	Sphingobium cupriresistens	MiE-4	2-med3	7	2.16774e+06	0.748297
	Sphingobium cupriresistens	MiE-4	2-med3	10	3.05419e+06	0.0870022
	Sphingobium cupriresistens	MiE-4	2-med3	10	2.99882e+06	0.134054
	Sphingobium cupriresistens	MiE-4	2-med3	10	3.08256e+06	0.117359
	Sphingobium cupriresistens	MiE-4	2-med3	14	4.11771e+06	0.0746954
	Sphingobium cupriresistens	MiE-4	2-med3	14	4.02915e+06	0.0738339
	Sphingobium cupriresistens	MiE-4	2-med3	14	3827000	0.0540804
	Sphingobium cupriresistens	MiE-4	2-med3	17	3.96883e+06	-0.0122748
	Sphingobium cupriresistens	MiE-4	2-med3	17	3.51285e+06	-0.0457088
	Sphingobium cupriresistens	MiE-4	2-med3	17	3.24989e+06	-0.0544862
	Sphingobium cupriresistens	MiE-4	3-med4	1	9547.37	-0.374421
	Sphingobium cupriresistens	MiE-4	3-med4	1	13263.2	-0.0456963
	Sphingobium cupriresistens	MiE-4	3-med4	1	10242.1	-0.304179
	Sphingobium cupriresistens	MiE-4	3-med4	3	307316	1.73581
	Sphingobium cupriresistens	MiE-4	3-med4	3	348021	1.63364
	Sphingobium cupriresistens	MiE-4	3-med4	3	325095	1.7288
	Sphingobium cupriresistens	MiE-4	3-med4	7	4.67948e+06	0.680767
	Sphingobium cupriresistens	MiE-4	3-med4	7	7.37027e+06	0.763237
	Sphingobium cupriresistens	MiE-4	3-med4	7	5.81475e+06	0.721009
	Sphingobium cupriresistens	MiE-4	3-med4	10	9.57588e+06	0.238687
	Sphingobium cupriresistens	MiE-4	3-med4	10	1.02226e+07	0.10905
	Sphingobium cupriresistens	MiE-4	3-med4	10	9.38944e+06	0.15973
	Sphingobium cupriresistens	MiE-4	3-med4	14	1.2169e+07	0.0599114
	Sphingobium cupriresistens	MiE-4	3-med4	14	1.35562e+07	0.0705601
	Sphingobium cupriresistens	MiE-4	3-med4	14	12514800	0.0718315
	Sphingobium cupriresistens	MiE-4	3-med4	17	1.57665e+07	0.0863321
	Sphingobium cupriresistens	MiE-4	3-med4	17	1.45369e+07	0.0232822
	Sphingobium cupriresistens	MiE-4	3-med4	17	1.45435e+07	0.0500763
	Sphingobium cupriresistens	MiE-4	5-MM	1	21336.8	0.429749
	Sphingobium cupriresistens	MiE-4	5-MM	1	20557.9	0.392559
	Sphingobium cupriresistens	MiE-4	5-MM	1	21126.3	0.419833
	Sphingobium cupriresistens	MiE-4	5-MM	3	31084.2	0.188132
	Sphingobium cupriresistens	MiE-4	5-MM	3	29547.4	0.181375
	Sphingobium cupriresistens	MiE-4	5-MM	3	36284.2	0.270432
	Sphingobium cupriresistens	MiE-4	5-MM	7	44705.3	0.0908478
	Sphingobium cupriresistens	MiE-4	5-MM	7	26526.3	-0.0269643
	Sphingobium cupriresistens	MiE-4	5-MM	7	24778.9	-0.0953471
	Sphingobium cupriresistens	MiE-4	5-MM	10	92421.1	0.242088
	Sphingobium cupriresistens	MiE-4	5-MM	10	62600	0.286209
	Sphingobium cupriresistens	MiE-4	5-MM	10	77757.9	0.381202
	Sphingobium cupriresistens	MiE-4	5-MM	14	573484	0.456344
	Sphingobium cupriresistens	MiE-4	5-MM	14	396937	0.461753
	Sphingobium cupriresistens	MiE-4	5-MM	14	291695	0.330527
	Sphingobium cupriresistens	MiE-4	5-MM	17	623200	0.0277124
	Sphingobium cupriresistens	MiE-4	5-MM	17	481053	0.0640665
	Sphingobium cupriresistens	MiE-4	5-MM	17	418611	0.120411
	Sphingobium cupriresistens	MiE-4	6-med2+MM	1	9684.21	-0.36019
	Sphingobium cupriresistens	MiE-4	6-med2+MM	1	6810.53	-0.712217
	Sphingobium cupriresistens	MiE-4	6-med2+MM	1	8421.05	-0.499952
	Sphingobium cupriresistens	MiE-4	6-med2+MM	3	32284.2	0.602041
	Sphingobium cupriresistens	MiE-4	6-med2+MM	3	25126.3	0.652723
	Sphingobium cupriresistens	MiE-4	6-med2+MM	3	29610.5	0.628698
	Sphingobium cupriresistens	MiE-4	6-med2+MM	7	295295	0.553349
	Sphingobium cupriresistens	MiE-4	6-med2+MM	7	171737	0.480512
	Sphingobium cupriresistens	MiE-4	6-med2+MM	7	148126	0.402484
	Sphingobium cupriresistens	MiE-4	6-med2+MM	10	1.19146e+06	0.464988
	Sphingobium cupriresistens	MiE-4	6-med2+MM	10	826337	0.52368
	Sphingobium cupriresistens	MiE-4	6-med2+MM	10	853242	0.583659
	Sphingobium cupriresistens	MiE-4	6-med2+MM	14	2.76345e+06	0.210325
	Sphingobium cupriresistens	MiE-4	6-med2+MM	14	2.13292e+06	0.237061
	Sphingobium cupriresistens	MiE-4	6-med2+MM	14	1.84443e+06	0.192721
	Sphingobium cupriresistens	MiE-4	6-med2+MM	17	2.40584e+06	-0.0461936
	Sphingobium cupriresistens	MiE-4	6-med2+MM	17	2.21372e+06	0.0123942
	Sphingobium cupriresistens	MiE-4	6-med2+MM	17	2.02878e+06	0.0317543
	Sphingobium cupriresistens	MiE-4	7-10xmed2	1	6810.53	-0.712217
	Sphingobium cupriresistens	MiE-4	7-10xmed2	1	8915.79	-0.442863
	Sphingobium cupriresistens	MiE-4	7-10xmed2	1	7578.95	-0.605312
	Sphingobium cupriresistens	MiE-4	7-10xmed2	3	65821.1	1.13424
	Sphingobium cupriresistens	MiE-4	7-10xmed2	3	47168.4	0.83295
	Sphingobium cupriresistens	MiE-4	7-10xmed2	3	50736.8	0.950639
	Sphingobium cupriresistens	MiE-4	7-10xmed2	7	1.47959e+06	0.778145
	Sphingobium cupriresistens	MiE-4	7-10xmed2	7	1.317e+06	0.832347
	Sphingobium cupriresistens	MiE-4	7-10xmed2	7	1.43097e+06	0.834864
	Sphingobium cupriresistens	MiE-4	7-10xmed2	10	3.49162e+06	0.2862
	Sphingobium cupriresistens	MiE-4	7-10xmed2	10	2730200	0.243006
	Sphingobium cupriresistens	MiE-4	7-10xmed2	10	3686600	0.315451
	Sphingobium cupriresistens	MiE-4	7-10xmed2	14	6.28933e+06	0.147122
	Sphingobium cupriresistens	MiE-4	7-10xmed2	14	5.70992e+06	0.184457
	Sphingobium cupriresistens	MiE-4	7-10xmed2	14	6.61351e+06	0.146102
	Sphingobium cupriresistens	MiE-4	7-10xmed2	17	6.93853e+06	0.0327451
	Sphingobium cupriresistens	MiE-4	7-10xmed2	17	6.41594e+06	0.0388603
	Sphingobium cupriresistens	MiE-4	7-10xmed2	17	7.24155e+06	0.0302404
	Sphingobium cupriresistens	MiE-4	8-10xmed3	1	7368.42	-0.633483
	Sphingobium cupriresistens	MiE-4	8-10xmed3	1	10947.4	-0.237587
	Sphingobium cupriresistens	MiE-4	8-10xmed3	1	10178.9	-0.310365
	Sphingobium cupriresistens	MiE-4	8-10xmed3	3	108547	1.34499
	Sphingobium cupriresistens	MiE-4	8-10xmed3	3	95378.9	1.08238
	Sphingobium cupriresistens	MiE-4	8-10xmed3	3	109211	1.18648
	Sphingobium cupriresistens	MiE-4	8-10xmed3	7	2.07645e+06	0.737807
	Sphingobium cupriresistens	MiE-4	8-10xmed3	7	1.41671e+06	0.674558
	Sphingobium cupriresistens	MiE-4	8-10xmed3	7	1.49805e+06	0.654661
	Sphingobium cupriresistens	MiE-4	8-10xmed3	10	3.95098e+06	0.214434
	Sphingobium cupriresistens	MiE-4	8-10xmed3	10	3435800	0.295305
	Sphingobium cupriresistens	MiE-4	8-10xmed3	10	3.15066e+06	0.247816
	Sphingobium cupriresistens	MiE-4	8-10xmed3	14	4757600	0.046445
	Sphingobium cupriresistens	MiE-4	8-10xmed3	14	4.16548e+06	0.0481457
	Sphingobium cupriresistens	MiE-4	8-10xmed3	14	3.74171e+06	0.0429821
	Sphingobium cupriresistens	MiE-4	8-10xmed3	17	4.41937e+06	-0.0245822
	Sphingobium cupriresistens	MiE-4	8-10xmed3	17	5.23284e+06	0.0760407
	Sphingobium cupriresistens	MiE-4	8-10xmed3	17	3.46916e+06	-0.0252099
	Sphingobium cupriresistens	MiE-4	9-10xmed4	1	101474	1.98911
	Sphingobium cupriresistens	MiE-4	9-10xmed4	1	99578.9	1.97026
	Sphingobium cupriresistens	MiE-4	9-10xmed4	1	95231.6	1.92563
	Sphingobium cupriresistens	MiE-4	9-10xmed4	3	1.33004e+07	2.43787
	Sphingobium cupriresistens	MiE-4	9-10xmed4	3	1.33912e+07	2.4507
	Sphingobium cupriresistens	MiE-4	9-10xmed4	3	1.14047e+07	2.39274
	Sphingobium cupriresistens	MiE-4	9-10xmed4	7	1.7068e+08	0.638
	Sphingobium cupriresistens	MiE-4	9-10xmed4	7	1.39567e+08	0.585987
	Sphingobium cupriresistens	MiE-4	9-10xmed4	7	1.25789e+08	0.600145
	Sphingobium cupriresistens	MiE-4	9-10xmed4	10	3.67823e+08	0.255936
	Sphingobium cupriresistens	MiE-4	9-10xmed4	10	2.73658e+08	0.224444
	Sphingobium cupriresistens	MiE-4	9-10xmed4	10	3.59763e+08	0.350279
	Sphingobium cupriresistens	MiE-4	9-10xmed4	14	2.64635e+08	-0.0823129
	Sphingobium cupriresistens	MiE-4	9-10xmed4	14	3.04446e+08	0.026654
	Sphingobium cupriresistens	MiE-4	9-10xmed4	14	2.24404e+08	-0.117999
	Sphingobium cupriresistens	MiE-4	9-10xmed4	17	2.32499e+08	-0.0431549
	Sphingobium cupriresistens	MiE-4	9-10xmed4	17	4.53645e+08	0.13294
	Sphingobium cupriresistens	MiE-4	9-10xmed4	17	5.07878e+08	0.272264
	Aquidulcibacter miladensis	MiH-15	0-all-media	0	15891.2
	Aquidulcibacter miladensis	MiH-15	1-med2	1	23231.6	0.736359
	Aquidulcibacter miladensis	MiH-15	1-med2	1	21126.3	0.752191
	Aquidulcibacter miladensis	MiH-15	1-med2	1	24421.1	0.728037
	Aquidulcibacter miladensis	MiH-15	1-med2	5	66873.7	0.264323
	Aquidulcibacter miladensis	MiH-15	1-med2	5	42873.7	0.176935
	Aquidulcibacter miladensis	MiH-15	1-med2	5	39789.5	0.122039
	Aquidulcibacter miladensis	MiH-15	1-med2	8	335116	0.537224
	Aquidulcibacter miladensis	MiH-15	1-med2	8	268863	0.611981
	Aquidulcibacter miladensis	MiH-15	1-med2	8	323168	0.69819
	Aquidulcibacter miladensis	MiH-15	1-med2	11	1.06625e+06	0.38581
	Aquidulcibacter miladensis	MiH-15	1-med2	11	900316	0.402848
	Aquidulcibacter miladensis	MiH-15	1-med2	11	982958	0.370798
	Aquidulcibacter miladensis	MiH-15	1-med2	18	3.35136e+06	0.163602
	Aquidulcibacter miladensis	MiH-15	1-med2	18	3.14831e+06	0.178839
	Aquidulcibacter miladensis	MiH-15	1-med2	18	3.12116e+06	0.165056
	Aquidulcibacter miladensis	MiH-15	1-med2	21	2.73933e+06	-0.0672179
	Aquidulcibacter miladensis	MiH-15	1-med2	21	2.87183e+06	-0.0306381
	Aquidulcibacter miladensis	MiH-15	1-med2	21	2.35626e+06	-0.093709
	Aquidulcibacter miladensis	MiH-15	1-med2	25	2.14626e+06	-0.0609959
	Aquidulcibacter miladensis	MiH-15	1-med2	25	2.18226e+06	-0.0686469
	Aquidulcibacter miladensis	MiH-15	1-med2	25	1.94644e+06	-0.0477685
	Aquidulcibacter miladensis	MiH-15	2-med3	1	20642.1	0.756055
	Aquidulcibacter miladensis	MiH-15	2-med3	1	23442.1	0.734855
	Aquidulcibacter miladensis	MiH-15	2-med3	1	24873.7	0.724976
	Aquidulcibacter miladensis	MiH-15	2-med3	5	70873.7	0.308392
	Aquidulcibacter miladensis	MiH-15	2-med3	5	36136.8	0.108195
	Aquidulcibacter miladensis	MiH-15	2-med3	5	41547.4	0.128256
	Aquidulcibacter miladensis	MiH-15	2-med3	8	612558	0.718915
	Aquidulcibacter miladensis	MiH-15	2-med3	8	498684	0.874887
	Aquidulcibacter miladensis	MiH-15	2-med3	8	609442	0.895237
	Aquidulcibacter miladensis	MiH-15	2-med3	11	1.19713e+06	0.223345
	Aquidulcibacter miladensis	MiH-15	2-med3	11	983863	0.226505
	Aquidulcibacter miladensis	MiH-15	2-med3	11	959537	0.151302
	Aquidulcibacter miladensis	MiH-15	2-med3	18	2.39264e+06	0.0989249
	Aquidulcibacter miladensis	MiH-15	2-med3	18	2.34513e+06	0.124087
	Aquidulcibacter miladensis	MiH-15	2-med3	18	2.25326e+06	0.121955
	Aquidulcibacter miladensis	MiH-15	2-med3	21	2.15818e+06	-0.0343778
	Aquidulcibacter miladensis	MiH-15	2-med3	21	1.90343e+06	-0.0695603
	Aquidulcibacter miladensis	MiH-15	2-med3	21	1.72793e+06	-0.0884858
	Aquidulcibacter miladensis	MiH-15	2-med3	25	1.54727e+06	-0.0831926
	Aquidulcibacter miladensis	MiH-15	2-med3	25	1.47271e+06	-0.0641393
	Aquidulcibacter miladensis	MiH-15	2-med3	25	1.24471e+06	-0.0820058
	Aquidulcibacter miladensis	MiH-15	3-med4	1	17189.5	0.786561
	Aquidulcibacter miladensis	MiH-15	3-med4	1	17684.2	0.781832
	Aquidulcibacter miladensis	MiH-15	3-med4	1	19294.7	0.767305
	Aquidulcibacter miladensis	MiH-15	3-med4	5	181642	0.589435
	Aquidulcibacter miladensis	MiH-15	3-med4	5	71294.7	0.348538
	Aquidulcibacter miladensis	MiH-15	3-med4	5	69484.2	0.320317
	Aquidulcibacter miladensis	MiH-15	3-med4	8	1862600	0.775897
	Aquidulcibacter miladensis	MiH-15	3-med4	8	1861000	1.08735
	Aquidulcibacter miladensis	MiH-15	3-med4	8	1.76338e+06	1.07796
	Aquidulcibacter miladensis	MiH-15	3-med4	11	2.30828e+06	0.0715104
	Aquidulcibacter miladensis	MiH-15	3-med4	11	2.84295e+06	0.141242
	Aquidulcibacter miladensis	MiH-15	3-med4	11	2.18618e+06	0.0716411
	Aquidulcibacter miladensis	MiH-15	3-med4	18	3.02793e+06	0.0387676
	Aquidulcibacter miladensis	MiH-15	3-med4	18	3.41734e+06	0.0262886
	Aquidulcibacter miladensis	MiH-15	3-med4	18	2.75699e+06	0.0331406
	Aquidulcibacter miladensis	MiH-15	3-med4	21	2.09502e+06	-0.122771
	Aquidulcibacter miladensis	MiH-15	3-med4	21	1.83937e+06	-0.20648
	Aquidulcibacter miladensis	MiH-15	3-med4	21	1.90955e+06	-0.122424
	Aquidulcibacter miladensis	MiH-15	3-med4	25	1.57045e+06	-0.0720499
	Aquidulcibacter miladensis	MiH-15	3-med4	25	1.51931e+06	-0.0477923
	Aquidulcibacter miladensis	MiH-15	3-med4	25	1.22808e+06	-0.110353
	Aquidulcibacter miladensis	MiH-15	5-MM	1	17336.8	0.785139
	Aquidulcibacter miladensis	MiH-15	5-MM	1	19294.7	0.767305
	Aquidulcibacter miladensis	MiH-15	5-MM	1	19947.4	0.761761
	Aquidulcibacter miladensis	MiH-15	5-MM	5	30978.9	0.145119
	Aquidulcibacter miladensis	MiH-15	5-MM	5	26326.3	0.0776842
	Aquidulcibacter miladensis	MiH-15	5-MM	5	31442.1	0.113763
	Aquidulcibacter miladensis	MiH-15	5-MM	8	78547.4	0.310131
	Aquidulcibacter miladensis	MiH-15	5-MM	8	81400	0.376269
	Aquidulcibacter miladensis	MiH-15	5-MM	8	72094.7	0.276611
	Aquidulcibacter miladensis	MiH-15	5-MM	11	145547	0.2056
	Aquidulcibacter miladensis	MiH-15	5-MM	11	138389	0.176899
	Aquidulcibacter miladensis	MiH-15	5-MM	11	126074	0.186295
	Aquidulcibacter miladensis	MiH-15	5-MM	18	274611	0.0906932
	Aquidulcibacter miladensis	MiH-15	5-MM	18	264368	0.0924674
	Aquidulcibacter miladensis	MiH-15	5-MM	18	241189	0.0926738
	Aquidulcibacter miladensis	MiH-15	5-MM	21	265768	-0.0109095
	Aquidulcibacter miladensis	MiH-15	5-MM	21	229126	-0.0476901
	Aquidulcibacter miladensis	MiH-15	5-MM	21	234316	-0.0096377
	Aquidulcibacter miladensis	MiH-15	5-MM	25	203768	-0.0664103
	Aquidulcibacter miladensis	MiH-15	5-MM	25	174495	-0.0680947
	Aquidulcibacter miladensis	MiH-15	5-MM	25	138242	-0.131916
	Aquidulcibacter miladensis	MiH-15	6-med2+MM	1	14031.6	0.820392
	Aquidulcibacter miladensis	MiH-15	6-med2+MM	1	12915.8	0.834202
	Aquidulcibacter miladensis	MiH-15	6-med2+MM	1	13610.5	0.82547
	Aquidulcibacter miladensis	MiH-15	6-med2+MM	5	19578.9	0.0832861
	Aquidulcibacter miladensis	MiH-15	6-med2+MM	5	13336.8	0.00801993
	Aquidulcibacter miladensis	MiH-15	6-med2+MM	5	12210.5	-0.0271363
	Aquidulcibacter miladensis	MiH-15	6-med2+MM	8	80284.2	0.470373
	Aquidulcibacter miladensis	MiH-15	6-med2+MM	8	81263.2	0.602387
	Aquidulcibacter miladensis	MiH-15	6-med2+MM	8	94810.5	0.683194
	Aquidulcibacter miladensis	MiH-15	6-med2+MM	11	168947	0.248005
	Aquidulcibacter miladensis	MiH-15	6-med2+MM	11	131095	0.159409
	Aquidulcibacter miladensis	MiH-15	6-med2+MM	11	170526	0.19567
	Aquidulcibacter miladensis	MiH-15	6-med2+MM	18	1.44767e+06	0.306875
	Aquidulcibacter miladensis	MiH-15	6-med2+MM	18	1318200	0.329729
	Aquidulcibacter miladensis	MiH-15	6-med2+MM	18	1.44856e+06	0.305633
	Aquidulcibacter miladensis	MiH-15	6-med2+MM	21	1.20409e+06	-0.06141
	Aquidulcibacter miladensis	MiH-15	6-med2+MM	21	928379	-0.116861
	Aquidulcibacter miladensis	MiH-15	6-med2+MM	21	891189	-0.161922
	Aquidulcibacter miladensis	MiH-15	6-med2+MM	25	774253	-0.110396
	Aquidulcibacter miladensis	MiH-15	6-med2+MM	25	557074	-0.127686
	Aquidulcibacter miladensis	MiH-15	6-med2+MM	25	605758	-0.0965192
	Aquidulcibacter miladensis	MiH-15	7-10xmed2	1	23715.8	0.732921
	Aquidulcibacter miladensis	MiH-15	7-10xmed2	1	24421.1	0.728037
	Aquidulcibacter miladensis	MiH-15	7-10xmed2	1	17336.8	0.785139
	Aquidulcibacter miladensis	MiH-15	7-10xmed2	5	113926	0.392353
	Aquidulcibacter miladensis	MiH-15	7-10xmed2	5	69126.3	0.260122
	Aquidulcibacter miladensis	MiH-15	7-10xmed2	5	47515.8	0.252057
	Aquidulcibacter miladensis	MiH-15	7-10xmed2	8	230958	0.235561
	Aquidulcibacter miladensis	MiH-15	7-10xmed2	8	91368.4	0.0929881
	Aquidulcibacter miladensis	MiH-15	7-10xmed2	8	73894.7	0.147193
	Aquidulcibacter miladensis	MiH-15	7-10xmed2	11	165547	-0.110993
	Aquidulcibacter miladensis	MiH-15	7-10xmed2	11	72357.9	-0.0777585
	Aquidulcibacter miladensis	MiH-15	7-10xmed2	11	61263.2	-0.0624877
	Aquidulcibacter miladensis	MiH-15	7-10xmed2	18	425695	0.134924
	Aquidulcibacter miladensis	MiH-15	7-10xmed2	18	129337	0.0829708
	Aquidulcibacter miladensis	MiH-15	7-10xmed2	18	191579	0.162874
	Aquidulcibacter miladensis	MiH-15	7-10xmed2	21	452705	0.0205063
	Aquidulcibacter miladensis	MiH-15	7-10xmed2	21	192632	0.132786
	Aquidulcibacter miladensis	MiH-15	7-10xmed2	21	457379	0.290071
	Aquidulcibacter miladensis	MiH-15	7-10xmed2	25	665221	0.0962195
	Aquidulcibacter miladensis	MiH-15	7-10xmed2	25	291253	0.103353
	Aquidulcibacter miladensis	MiH-15	7-10xmed2	25	674453	0.0970973
	Aquidulcibacter miladensis	MiH-15	8-10xmed3	1	15084.2	0.808336
	Aquidulcibacter miladensis	MiH-15	8-10xmed3	1	21684.2	0.747847
	Aquidulcibacter miladensis	MiH-15	8-10xmed3	1	16978.9	0.788615
	Aquidulcibacter miladensis	MiH-15	8-10xmed3	5	79294.7	0.414881
	Aquidulcibacter miladensis	MiH-15	8-10xmed3	5	45263.2	0.183977
	Aquidulcibacter miladensis	MiH-15	8-10xmed3	5	37473.7	0.197916
	Aquidulcibacter miladensis	MiH-15	8-10xmed3	8	535937	0.636948
	Aquidulcibacter miladensis	MiH-15	8-10xmed3	8	446179	0.762742
	Aquidulcibacter miladensis	MiH-15	8-10xmed3	8	441842	0.822438
	Aquidulcibacter miladensis	MiH-15	8-10xmed3	11	577747	0.0250401
	Aquidulcibacter miladensis	MiH-15	8-10xmed3	11	591684	0.0940843
	Aquidulcibacter miladensis	MiH-15	8-10xmed3	11	509337	0.0473857
	Aquidulcibacter miladensis	MiH-15	8-10xmed3	18	1.78323e+06	0.161007
	Aquidulcibacter miladensis	MiH-15	8-10xmed3	18	1.61789e+06	0.143701
	Aquidulcibacter miladensis	MiH-15	8-10xmed3	18	1.55201e+06	0.159171
	Aquidulcibacter miladensis	MiH-15	8-10xmed3	21	1.39376e+06	-0.0821412
	Aquidulcibacter miladensis	MiH-15	8-10xmed3	21	1.23122e+06	-0.0910398
	Aquidulcibacter miladensis	MiH-15	8-10xmed3	21	1.17559e+06	-0.0925938
	Aquidulcibacter miladensis	MiH-15	8-10xmed3	25	912232	-0.105966
	Aquidulcibacter miladensis	MiH-15	8-10xmed3	25	621400	-0.170947
	Aquidulcibacter miladensis	MiH-15	8-10xmed3	25	831221	-0.0866573
	Aquidulcibacter miladensis	MiH-15	9-10xmed4	1	32842.1	0.678659
	Aquidulcibacter miladensis	MiH-15	9-10xmed4	1	24705.3	0.726108
	Aquidulcibacter miladensis	MiH-15	9-10xmed4	1	26389.5	0.715117
	Aquidulcibacter miladensis	MiH-15	9-10xmed4	5	92978.9	0.260165
	Aquidulcibacter miladensis	MiH-15	9-10xmed4	5	40073.7	0.120926
	Aquidulcibacter miladensis	MiH-15	9-10xmed4	5	30031.6	0.0323211
	Aquidulcibacter miladensis	MiH-15	9-10xmed4	8	656705	0.651621
	Aquidulcibacter miladensis	MiH-15	9-10xmed4	8	214179	0.558697
	Aquidulcibacter miladensis	MiH-15	9-10xmed4	8	171611	0.580993
	Aquidulcibacter miladensis	MiH-15	9-10xmed4	11	1.81586e+06	0.339027
	Aquidulcibacter miladensis	MiH-15	9-10xmed4	11	783653	0.432385
	Aquidulcibacter miladensis	MiH-15	9-10xmed4	11	668768	0.453403
	Aquidulcibacter miladensis	MiH-15	9-10xmed4	18	7.66832e+06	0.205791
	Aquidulcibacter miladensis	MiH-15	9-10xmed4	18	7.23902e+06	0.317611
	Aquidulcibacter miladensis	MiH-15	9-10xmed4	18	1.01145e+07	0.388041
	Aquidulcibacter miladensis	MiH-15	9-10xmed4	21	4.92416e+06	-0.147648
	Aquidulcibacter miladensis	MiH-15	9-10xmed4	21	1.18917e+07	0.165451
	Aquidulcibacter miladensis	MiH-15	9-10xmed4	21	9.60171e+06	-0.0173436
	Aquidulcibacter miladensis	MiH-15	9-10xmed4	25	4.08129e+06	-0.0469347
	Aquidulcibacter miladensis	MiH-15	9-10xmed4	25	3.99011e+06	-0.273005
	Aquidulcibacter miladensis	MiH-15	9-10xmed4	25	6.15758e+06	-0.111064
	Caulobacter lacus	MiH-16	0-all-media	0	32244.7
	Caulobacter lacus	MiH-16	1-med2	1	28294.7	0.364104
	Caulobacter lacus	MiH-16	1-med2	1	37684.2	0.347247
	Caulobacter lacus	MiH-16	1-med2	1	33210.5	0.354681
	Caulobacter lacus	MiH-16	1-med2	4	4.00262e+06	1.65068
	Caulobacter lacus	MiH-16	1-med2	4	2.05392e+06	1.33275
	Caulobacter lacus	MiH-16	1-med2	4	1.07066e+06	1.15772
	Caulobacter lacus	MiH-16	1-med2	8	9.32627e+06	0.211472
	Caulobacter lacus	MiH-16	1-med2	8	2.04392e+06	-0.00122016
	Caulobacter lacus	MiH-16	1-med2	8	1.57432e+06	0.0963856
	Caulobacter lacus	MiH-16	1-med2	11	1.1616e+07	0.0731829
	Caulobacter lacus	MiH-16	1-med2	11	1.47923e+06	-0.107782
	Caulobacter lacus	MiH-16	1-med2	11	1.07722e+06	-0.126479
	Caulobacter lacus	MiH-16	1-med2	14	1.41174e+07	0.0650074
	Caulobacter lacus	MiH-16	1-med2	14	1.55272e+06	0.0161609
	Caulobacter lacus	MiH-16	1-med2	14	872000	-0.0704502
	Caulobacter lacus	MiH-16	1-med2	18	1.49664e+07	0.0146006
	Caulobacter lacus	MiH-16	1-med2	18	1.06234e+06	-0.0948836
	Caulobacter lacus	MiH-16	1-med2	18	754811	-0.0360807
	Caulobacter lacus	MiH-16	1-med2	21	1.39533e+06	-0.790892
	Caulobacter lacus	MiH-16	1-med2	21	715305	-0.131839
	Caulobacter lacus	MiH-16	1-med2	21	603684	-0.0744718
	Caulobacter lacus	MiH-16	2-med3	1	23231.6	0.375702
	Caulobacter lacus	MiH-16	2-med3	1	32284.2	0.356345
	Caulobacter lacus	MiH-16	2-med3	1	30389.5	0.359902
	Caulobacter lacus	MiH-16	2-med3	4	1.71516e+06	1.43392
	Caulobacter lacus	MiH-16	2-med3	4	1.01645e+06	1.14983
	Caulobacter lacus	MiH-16	2-med3	4	1.48056e+06	1.29536
	Caulobacter lacus	MiH-16	2-med3	8	9.21417e+06	0.420309
	Caulobacter lacus	MiH-16	2-med3	8	2.22993e+06	0.196412
	Caulobacter lacus	MiH-16	2-med3	8	2.04731e+06	0.0810264
	Caulobacter lacus	MiH-16	2-med3	11	1.14969e+07	0.0737779
	Caulobacter lacus	MiH-16	2-med3	11	1.50481e+06	-0.131101
	Caulobacter lacus	MiH-16	2-med3	11	1.57174e+06	-0.0881144
	Caulobacter lacus	MiH-16	2-med3	14	1.33782e+07	0.0505179
	Caulobacter lacus	MiH-16	2-med3	14	1.48051e+06	-0.00542786
	Caulobacter lacus	MiH-16	2-med3	14	1.47004e+06	-0.0222967
	Caulobacter lacus	MiH-16	2-med3	18	1.55833e+07	0.0381431
	Caulobacter lacus	MiH-16	2-med3	18	1.01937e+06	-0.0933
	Caulobacter lacus	MiH-16	2-med3	18	1.02104e+06	-0.0911168
	Caulobacter lacus	MiH-16	2-med3	21	1.66977e+06	-0.744505
	Caulobacter lacus	MiH-16	2-med3	21	1.10057e+06	0.0255479
	Caulobacter lacus	MiH-16	2-med3	21	1.26962e+06	0.0726316
	Caulobacter lacus	MiH-16	3-med4	1	46031.6	0.335477
	Caulobacter lacus	MiH-16	3-med4	1	52978.9	0.327208
	Caulobacter lacus	MiH-16	3-med4	1	41610.5	0.341417
	Caulobacter lacus	MiH-16	3-med4	4	2728000	1.36067
	Caulobacter lacus	MiH-16	3-med4	4	36122800	2.17493
	Caulobacter lacus	MiH-16	3-med4	4	38265000	2.27465
	Caulobacter lacus	MiH-16	3-med4	8	42384500	0.685803
	Caulobacter lacus	MiH-16	3-med4	8	52324700	0.0926361
	Caulobacter lacus	MiH-16	3-med4	8	46105600	0.0465997
	Caulobacter lacus	MiH-16	3-med4	11	39780800	-0.0211328
	Caulobacter lacus	MiH-16	3-med4	11	62320700	0.058275
	Caulobacter lacus	MiH-16	3-med4	11	91472900	0.228369
	Caulobacter lacus	MiH-16	3-med4	14	59722200	0.13544
	Caulobacter lacus	MiH-16	3-med4	14	118062500	0.212974
	Caulobacter lacus	MiH-16	3-med4	14	81179600	-0.0397929
	Caulobacter lacus	MiH-16	3-med4	18	15443600	-0.338127
	Caulobacter lacus	MiH-16	3-med4	18	52318700	-0.203465
	Caulobacter lacus	MiH-16	3-med4	18	47159700	-0.135781
	Caulobacter lacus	MiH-16	3-med4	21	54688000	0.421483
	Caulobacter lacus	MiH-16	3-med4	21	80543100	0.143813
	Caulobacter lacus	MiH-16	3-med4	21	80003520	0.176177
	Caulobacter lacus	MiH-16	5-MM	1	23715.8	0.374488
	Caulobacter lacus	MiH-16	5-MM	1	24842.1	0.371759
	Caulobacter lacus	MiH-16	5-MM	1	20715.8	0.382444
	Caulobacter lacus	MiH-16	5-MM	4	9757.89	-0.296021
	Caulobacter lacus	MiH-16	5-MM	4	11442.1	-0.258413
	Caulobacter lacus	MiH-16	5-MM	4	38810.5	0.209265
	Caulobacter lacus	MiH-16	5-MM	8	7157.89	-0.0774652
	Caulobacter lacus	MiH-16	5-MM	8	7789.47	-0.0961317
	Caulobacter lacus	MiH-16	5-MM	8	6663.16	-0.440524
	Caulobacter lacus	MiH-16	5-MM	11	11652.6	0.162439
	Caulobacter lacus	MiH-16	5-MM	11	5336.84	-0.126046
	Caulobacter lacus	MiH-16	5-MM	11	6389.47	-0.0139805
	Caulobacter lacus	MiH-16	5-MM	14	4978.95	-0.283438
	Caulobacter lacus	MiH-16	5-MM	14	6105.26	0.044839
	Caulobacter lacus	MiH-16	5-MM	14	3715.79	-0.180687
	Caulobacter lacus	MiH-16	5-MM	18	6600	0.0704628
	Caulobacter lacus	MiH-16	5-MM	18	3442.11	-0.143267
	Caulobacter lacus	MiH-16	5-MM	18	3231.58	-0.0349051
	Caulobacter lacus	MiH-16	5-MM	21	8842.11	0.0974851
	Caulobacter lacus	MiH-16	5-MM	21	11084.2	0.389813
	Caulobacter lacus	MiH-16	5-MM	21	6873.68	0.251576
	Caulobacter lacus	MiH-16	6-med2+MM	1	27842.1	0.365052
	Caulobacter lacus	MiH-16	6-med2+MM	1	20421.1	0.383287
	Caulobacter lacus	MiH-16	6-med2+MM	1	15505.3	0.399486
	Caulobacter lacus	MiH-16	6-med2+MM	4	13421.1	-0.243242
	Caulobacter lacus	MiH-16	6-med2+MM	4	19578.9	-0.0140372
	Caulobacter lacus	MiH-16	6-med2+MM	4	12842.1	-0.0628168
	Caulobacter lacus	MiH-16	6-med2+MM	8	12978.9	-0.00837399
	Caulobacter lacus	MiH-16	6-med2+MM	8	13189.5	-0.098759
	Caulobacter lacus	MiH-16	6-med2+MM	8	9968.42	-0.0633268
	Caulobacter lacus	MiH-16	6-med2+MM	11	9968.42	-0.0879688
	Caulobacter lacus	MiH-16	6-med2+MM	11	10600	-0.072855
	Caulobacter lacus	MiH-16	6-med2+MM	11	8284.21	-0.0616903
	Caulobacter lacus	MiH-16	6-med2+MM	14	8494.74	-0.0533251
	Caulobacter lacus	MiH-16	6-med2+MM	14	7789.47	-0.102694
	Caulobacter lacus	MiH-16	6-med2+MM	14	8842.11	0.0217245
	Caulobacter lacus	MiH-16	6-med2+MM	18	6178.95	-0.0795747
	Caulobacter lacus	MiH-16	6-med2+MM	18	6031.58	-0.0639411
	Caulobacter lacus	MiH-16	6-med2+MM	18	8421.05	-0.0121975
	Caulobacter lacus	MiH-16	6-med2+MM	21	14389.5	0.281783
	Caulobacter lacus	MiH-16	6-med2+MM	21	8557.89	0.116615
	Caulobacter lacus	MiH-16	6-med2+MM	21	11715.8	0.110068
	Caulobacter lacus	MiH-16	7-10xmed2	1	22263.2	0.378206
	Caulobacter lacus	MiH-16	7-10xmed2	1	19094.7	0.387237
	Caulobacter lacus	MiH-16	7-10xmed2	1	17126.3	0.393637
	Caulobacter lacus	MiH-16	7-10xmed2	4	2.76531e+06	1.60732
	Caulobacter lacus	MiH-16	7-10xmed2	4	3.44015e+06	1.73129
	Caulobacter lacus	MiH-16	7-10xmed2	4	3.55779e+06	1.77876
	Caulobacter lacus	MiH-16	7-10xmed2	8	8.781e+06	0.28886
	Caulobacter lacus	MiH-16	7-10xmed2	8	2.13993e+07	0.456961
	Caulobacter lacus	MiH-16	7-10xmed2	8	2.19163e+07	0.454523
	Caulobacter lacus	MiH-16	7-10xmed2	11	10956100	0.0737687
	Caulobacter lacus	MiH-16	7-10xmed2	11	36754800	0.180303
	Caulobacter lacus	MiH-16	7-10xmed2	11	34659900	0.152784
	Caulobacter lacus	MiH-16	7-10xmed2	14	10404900	-0.0172065
	Caulobacter lacus	MiH-16	7-10xmed2	14	31671400	-0.0496183
	Caulobacter lacus	MiH-16	7-10xmed2	14	29074400	-0.0585751
	Caulobacter lacus	MiH-16	7-10xmed2	18	17321200	0.127414
	Caulobacter lacus	MiH-16	7-10xmed2	18	27200200	-0.0380474
	Caulobacter lacus	MiH-16	7-10xmed2	18	19178000	-0.104024
	Caulobacter lacus	MiH-16	7-10xmed2	21	13780200	-0.0762328
	Caulobacter lacus	MiH-16	7-10xmed2	21	20008300	-0.102359
	Caulobacter lacus	MiH-16	7-10xmed2	21	14568800	-0.0916272
	Caulobacter lacus	MiH-16	8-10xmed3	1	21263.2	0.38091
	Caulobacter lacus	MiH-16	8-10xmed3	1	21126.3	0.381289
	Caulobacter lacus	MiH-16	8-10xmed3	1	21631.6	0.379899
	Caulobacter lacus	MiH-16	8-10xmed3	4	2.72972e+06	1.61833
	Caulobacter lacus	MiH-16	8-10xmed3	4	3.33573e+06	1.68731
	Caulobacter lacus	MiH-16	8-10xmed3	4	5.40964e+06	1.84059
	Caulobacter lacus	MiH-16	8-10xmed3	8	9.13891e+06	0.302086
	Caulobacter lacus	MiH-16	8-10xmed3	8	2.01141e+07	0.449183
	Caulobacter lacus	MiH-16	8-10xmed3	8	20863400	0.337453
	Caulobacter lacus	MiH-16	8-10xmed3	11	11175400	0.0670581
	Caulobacter lacus	MiH-16	8-10xmed3	11	34695400	0.181729
	Caulobacter lacus	MiH-16	8-10xmed3	11	38676100	0.205742
	Caulobacter lacus	MiH-16	8-10xmed3	14	14918300	0.0962912
	Caulobacter lacus	MiH-16	8-10xmed3	14	26480700	-0.0900636
	Caulobacter lacus	MiH-16	8-10xmed3	14	30631500	-0.077731
	Caulobacter lacus	MiH-16	8-10xmed3	18	15943300	0.0166125
	Caulobacter lacus	MiH-16	8-10xmed3	18	24929800	-0.0150881
	Caulobacter lacus	MiH-16	8-10xmed3	18	26854400	-0.0328998
	Caulobacter lacus	MiH-16	8-10xmed3	21	14329400	-0.0355751
	Caulobacter lacus	MiH-16	8-10xmed3	21	16803000	-0.131502
	Caulobacter lacus	MiH-16	8-10xmed3	21	17743200	-0.138142
	Caulobacter lacus	MiH-16	9-10xmed4	1	33610.5	0.353976
	Caulobacter lacus	MiH-16	9-10xmed4	1	38031.6	0.346707
	Caulobacter lacus	MiH-16	9-10xmed4	1	50526.3	0.329997
	Caulobacter lacus	MiH-16	9-10xmed4	4	50289500	2.4369
	Caulobacter lacus	MiH-16	9-10xmed4	4	79720200	2.54929
	Caulobacter lacus	MiH-16	9-10xmed4	4	77570600	2.44548
	Caulobacter lacus	MiH-16	9-10xmed4	8	65648000	0.0666277
	Caulobacter lacus	MiH-16	9-10xmed4	8	163676000	0.179841
	Caulobacter lacus	MiH-16	9-10xmed4	8	127684300	0.124593
	Caulobacter lacus	MiH-16	9-10xmed4	11	79113700	0.062193
	Caulobacter lacus	MiH-16	9-10xmed4	11	112718400	-0.124332
	Caulobacter lacus	MiH-16	9-10xmed4	11	104997800	-0.0652071
	Caulobacter lacus	MiH-16	9-10xmed4	14	145464300	0.203015
	Caulobacter lacus	MiH-16	9-10xmed4	14	168227200	0.133474
	Caulobacter lacus	MiH-16	9-10xmed4	14	175789500	0.171783
	Caulobacter lacus	MiH-16	9-10xmed4	18	94753900	-0.107162
	Caulobacter lacus	MiH-16	9-10xmed4	18	141523100	-0.0432131
	Caulobacter lacus	MiH-16	9-10xmed4	18	135273800	-0.0654966
	Caulobacter lacus	MiH-16	9-10xmed4	21	72169200	-0.0907565
	Caulobacter lacus	MiH-16	9-10xmed4	21	101854300	-0.10964
	Caulobacter lacus	MiH-16	9-10xmed4	21	92340500	-0.127273
	Fimbriicoccus planktonicus	MsE-15	0-all-media	0	137297
	Fimbriicoccus planktonicus	MsE-15	1-med2	3	175747	1.25102
	Fimbriicoccus planktonicus	MsE-15	1-med2	3	152463	1.28655
	Fimbriicoccus planktonicus	MsE-15	1-med2	3	126411	1.33339
	Fimbriicoccus planktonicus	MsE-15	2-med3	3	150211	1.29027
	Fimbriicoccus planktonicus	MsE-15	2-med3	3	153632	1.28464
	Fimbriicoccus planktonicus	MsE-15	2-med3	3	153442	1.28495
	Fimbriicoccus planktonicus	MsE-15	6-med2+MM	3	162568	1.2705
	Fimbriicoccus planktonicus	MsE-15	6-med2+MM	3	180389	1.2445
	Fimbriicoccus planktonicus	MsE-15	6-med2+MM	3	177832	1.24807
	Fimbriicoccus planktonicus	MsE-15	7-10xmed2	3	135642	1.31577
	Fimbriicoccus planktonicus	MsE-15	7-10xmed2	3	131674	1.3232
	Fimbriicoccus planktonicus	MsE-15	7-10xmed2	3	105032	1.37971
	Fimbriicoccus planktonicus	MsE-15	8-10xmed3	3	163368	1.26928
	Fimbriicoccus planktonicus	MsE-15	8-10xmed3	3	149116	1.2921
	Fimbriicoccus planktonicus	MsE-15	8-10xmed3	3	136379	1.31442
	Fimbriicoccus planktonicus	MsE-15	9-10xmed4	3	98147.4	1.39666
	Fimbriicoccus planktonicus	MsE-15	9-10xmed4	3	103579	1.38319
	Fimbriicoccus planktonicus	MsE-15	9-10xmed4	3	103389	1.38365
	Fimbriicoccus planktonicus	MsE-15	1-med2	7	801358	0.379315
	Fimbriicoccus planktonicus	MsE-15	1-med2	7	769737	0.404781
	Fimbriicoccus planktonicus	MsE-15	1-med2	7	799737	0.461187
	Fimbriicoccus planktonicus	MsE-15	2-med3	7	806905	0.420292
	Fimbriicoccus planktonicus	MsE-15	2-med3	7	815221	0.417225
	Fimbriicoccus planktonicus	MsE-15	2-med3	7	708389	0.382418
	Fimbriicoccus planktonicus	MsE-15	6-med2+MM	7	917853	0.432734
	Fimbriicoccus planktonicus	MsE-15	6-med2+MM	7	2.25946e+06	0.631941
	Fimbriicoccus planktonicus	MsE-15	6-med2+MM	7	2243600	0.63375
	Fimbriicoccus planktonicus	MsE-15	7-10xmed2	7	408474	0.275602
	Fimbriicoccus planktonicus	MsE-15	7-10xmed2	7	369495	0.257952
	Fimbriicoccus planktonicus	MsE-15	7-10xmed2	7	345600	0.297755
	Fimbriicoccus planktonicus	MsE-15	8-10xmed3	7	456337	0.256806
	Fimbriicoccus planktonicus	MsE-15	8-10xmed3	7	448516	0.275305
	Fimbriicoccus planktonicus	MsE-15	8-10xmed3	7	381221	0.256985
	Fimbriicoccus planktonicus	MsE-15	9-10xmed4	7	364789	0.328213
	Fimbriicoccus planktonicus	MsE-15	9-10xmed4	7	355705	0.308442
	Fimbriicoccus planktonicus	MsE-15	9-10xmed4	7	387653	0.330402
	Fimbriicoccus planktonicus	MsE-15	1-med2	10	776305	-0.0105873
	Fimbriicoccus planktonicus	MsE-15	1-med2	10	870789	0.0411172
	Fimbriicoccus planktonicus	MsE-15	1-med2	10	787684	-0.00506182
	Fimbriicoccus planktonicus	MsE-15	2-med3	10	1.02365e+06	0.0793088
	Fimbriicoccus planktonicus	MsE-15	2-med3	10	1.05343e+06	0.0854497
	Fimbriicoccus planktonicus	MsE-15	2-med3	10	1.03076e+06	0.125019
	Fimbriicoccus planktonicus	MsE-15	6-med2+MM	10	4.39497e+06	0.52206
	Fimbriicoccus planktonicus	MsE-15	6-med2+MM	10	4.31359e+06	0.215548
	Fimbriicoccus planktonicus	MsE-15	6-med2+MM	10	3.65552e+06	0.162718
	Fimbriicoccus planktonicus	MsE-15	7-10xmed2	10	898495	0.262764
	Fimbriicoccus planktonicus	MsE-15	7-10xmed2	10	865874	0.283868
	Fimbriicoccus planktonicus	MsE-15	7-10xmed2	10	742505	0.254916
	Fimbriicoccus planktonicus	MsE-15	8-10xmed3	10	990221	0.258232
	Fimbriicoccus planktonicus	MsE-15	8-10xmed3	10	1.22059e+06	0.333715
	Fimbriicoccus planktonicus	MsE-15	8-10xmed3	10	929463	0.297076
	Fimbriicoccus planktonicus	MsE-15	9-10xmed4	10	1.39679e+06	0.447537
	Fimbriicoccus planktonicus	MsE-15	9-10xmed4	10	1.33601e+06	0.441114
	Fimbriicoccus planktonicus	MsE-15	9-10xmed4	10	1376200	0.422324
	Fimbriicoccus planktonicus	MsE-15	1-med2	17	1.00103e+06	0.0363201
	Fimbriicoccus planktonicus	MsE-15	1-med2	17	1.10115e+06	0.0335297
	Fimbriicoccus planktonicus	MsE-15	1-med2	17	1.15172e+06	0.054273
	Fimbriicoccus planktonicus	MsE-15	2-med3	17	1.72822e+06	0.0748165
	Fimbriicoccus planktonicus	MsE-15	2-med3	17	1.60099e+06	0.0597956
	Fimbriicoccus planktonicus	MsE-15	2-med3	17	1.77558e+06	0.0776903
	Fimbriicoccus planktonicus	MsE-15	6-med2+MM	17	5.34076e+06	0.0278439
	Fimbriicoccus planktonicus	MsE-15	6-med2+MM	17	4.75189e+06	0.0138247
	Fimbriicoccus planktonicus	MsE-15	6-med2+MM	17	5.62805e+06	0.0616466
	Fimbriicoccus planktonicus	MsE-15	7-10xmed2	17	1.77221e+06	0.0970374
	Fimbriicoccus planktonicus	MsE-15	7-10xmed2	17	1.72117e+06	0.0981457
	Fimbriicoccus planktonicus	MsE-15	7-10xmed2	17	1.73446e+06	0.121203
	Fimbriicoccus planktonicus	MsE-15	8-10xmed3	17	2.20349e+06	0.114267
	Fimbriicoccus planktonicus	MsE-15	8-10xmed3	17	1.95723e+06	0.0674567
	Fimbriicoccus planktonicus	MsE-15	8-10xmed3	17	2.49559e+06	0.141096
	Fimbriicoccus planktonicus	MsE-15	9-10xmed4	17	1.24632e+07	0.312657
	Fimbriicoccus planktonicus	MsE-15	9-10xmed4	17	1.23749e+07	0.317997
	Fimbriicoccus planktonicus	MsE-15	9-10xmed4	17	1.36523e+07	0.327797
	Fimbriicoccus planktonicus	MsE-15	1-med2	24	1.01315e+06	0.00171866
	Fimbriicoccus planktonicus	MsE-15	1-med2	24	1.17249e+06	0.00896872
	Fimbriicoccus planktonicus	MsE-15	1-med2	24	1.23692e+06	0.0101955
	Fimbriicoccus planktonicus	MsE-15	2-med3	24	2.00048e+06	0.0208995
	Fimbriicoccus planktonicus	MsE-15	2-med3	24	1.84744e+06	0.0204543
	Fimbriicoccus planktonicus	MsE-15	2-med3	24	1.94985e+06	0.0133753
	Fimbriicoccus planktonicus	MsE-15	6-med2+MM	24	5.86569e+06	0.0133933
	Fimbriicoccus planktonicus	MsE-15	6-med2+MM	24	6.36082e+06	0.0416591
	Fimbriicoccus planktonicus	MsE-15	6-med2+MM	24	5.96745e+06	0.00836524
	Fimbriicoccus planktonicus	MsE-15	7-10xmed2	24	3.37605e+06	0.0920685
	Fimbriicoccus planktonicus	MsE-15	7-10xmed2	24	3.75154e+06	0.111309
	Fimbriicoccus planktonicus	MsE-15	7-10xmed2	24	3.53444e+06	0.101694
	Fimbriicoccus planktonicus	MsE-15	8-10xmed3	24	4.49222e+06	0.101758
	Fimbriicoccus planktonicus	MsE-15	8-10xmed3	24	4.49858e+06	0.11889
	Fimbriicoccus planktonicus	MsE-15	8-10xmed3	24	4.30404e+06	0.0778614
	Fimbriicoccus planktonicus	MsE-15	9-10xmed4	24	1.91025e+07	0.0610057
	Fimbriicoccus planktonicus	MsE-15	9-10xmed4	24	2.02823e+07	0.0705828
	Fimbriicoccus planktonicus	MsE-15	9-10xmed4	24	1.88501e+07	0.0460873
	Fimbriicoccus planktonicus	MsE-15	1-med2	31	917768	-0.0141246
	Fimbriicoccus planktonicus	MsE-15	1-med2	31	902737	-0.0373511
	Fimbriicoccus planktonicus	MsE-15	1-med2	31	869621	-0.0503313
	Fimbriicoccus planktonicus	MsE-15	2-med3	31	1.20074e+06	-0.072922
	Fimbriicoccus planktonicus	MsE-15	2-med3	31	1.22034e+06	-0.0592393
	Fimbriicoccus planktonicus	MsE-15	2-med3	31	1.23257e+06	-0.065522
	Fimbriicoccus planktonicus	MsE-15	6-med2+MM	31	1.74307e+06	-0.173353
	Fimbriicoccus planktonicus	MsE-15	6-med2+MM	31	1.91242e+06	-0.171684
	Fimbriicoccus planktonicus	MsE-15	6-med2+MM	31	1.79341e+06	-0.171743
	Fimbriicoccus planktonicus	MsE-15	7-10xmed2	31	1.69244e+06	-0.0986478
	Fimbriicoccus planktonicus	MsE-15	7-10xmed2	31	2.03261e+06	-0.0875492
	Fimbriicoccus planktonicus	MsE-15	7-10xmed2	31	2.13486e+06	-0.0720218
	Fimbriicoccus planktonicus	MsE-15	8-10xmed3	31	2.68857e+06	-0.0733341
	Fimbriicoccus planktonicus	MsE-15	8-10xmed3	31	2.52945e+06	-0.0822512
	Fimbriicoccus planktonicus	MsE-15	8-10xmed3	31	2.58958e+06	-0.0725799
	Fimbriicoccus planktonicus	MsE-15	9-10xmed4	31	9.58691e+06	-0.0984885
	Fimbriicoccus planktonicus	MsE-15	9-10xmed4	31	1.0449e+07	-0.0947484
	Fimbriicoccus planktonicus	MsE-15	9-10xmed4	31	1.04802e+07	-0.0838614
	Planktophila versatilis	MsE-18	0-all-media	0	43644.7
	Planktophila versatilis	MsE-18	1-med2	1	46526.3	0.21448
	Planktophila versatilis	MsE-18	1-med2	1	41894.7	0.220648
	Planktophila versatilis	MsE-18	1-med2	1	35084.2	0.231084
	Planktophila versatilis	MsE-18	1-med2	4	164863	0.421699
	Planktophila versatilis	MsE-18	1-med2	4	149642	0.424362
	Planktophila versatilis	MsE-18	1-med2	4	133821	0.446251
	Planktophila versatilis	MsE-18	1-med2	8	281926	0.134132
	Planktophila versatilis	MsE-18	1-med2	8	310084	0.182149
	Planktophila versatilis	MsE-18	1-med2	8	288632	0.192162
	Planktophila versatilis	MsE-18	1-med2	11	266895	-0.0182638
	Planktophila versatilis	MsE-18	1-med2	11	316453	0.00677655
	Planktophila versatilis	MsE-18	1-med2	11	273411	-0.0180589
	Planktophila versatilis	MsE-18	1-med2	14	279242	0.0150749
	Planktophila versatilis	MsE-18	1-med2	14	379347	0.0604263
	Planktophila versatilis	MsE-18	1-med2	14	318105	0.0504693
	Planktophila versatilis	MsE-18	1-med2	18	272695	-0.00593154
	Planktophila versatilis	MsE-18	1-med2	18	362400	-0.0114259
	Planktophila versatilis	MsE-18	1-med2	18	408895	0.0627689
	Planktophila versatilis	MsE-18	1-med2	21	272400	-0.000360472
	Planktophila versatilis	MsE-18	1-med2	21	359368	-0.00280016
	Planktophila versatilis	MsE-18	1-med2	21	364168	-0.0386138
	Planktophila versatilis	MsE-18	2-med3	1	33473.7	0.233848
	Planktophila versatilis	MsE-18	2-med3	1	25115.8	0.250746
	Planktophila versatilis	MsE-18	2-med3	1	27157.9	0.246148
	Planktophila versatilis	MsE-18	2-med3	4	80347.4	0.291867
	Planktophila versatilis	MsE-18	2-med3	4	59547.4	0.287758
	Planktophila versatilis	MsE-18	2-med3	4	29473.7	0.0272767
	Planktophila versatilis	MsE-18	2-med3	8	440568	0.425427
	Planktophila versatilis	MsE-18	2-med3	8	410474	0.482635
	Planktophila versatilis	MsE-18	2-med3	8	335095	0.607729
	Planktophila versatilis	MsE-18	2-med3	11	470779	0.0221076
	Planktophila versatilis	MsE-18	2-med3	11	439253	0.0225876
	Planktophila versatilis	MsE-18	2-med3	11	317663	-0.0178072
	Planktophila versatilis	MsE-18	2-med3	14	468421	-0.00167369
	Planktophila versatilis	MsE-18	2-med3	14	524211	0.0589396
	Planktophila versatilis	MsE-18	2-med3	14	368053	0.0490781
	Planktophila versatilis	MsE-18	2-med3	18	484095	0.00822826
	Planktophila versatilis	MsE-18	2-med3	18	570674	0.021231
	Planktophila versatilis	MsE-18	2-med3	18	399895	0.0207439
	Planktophila versatilis	MsE-18	2-med3	21	422495	-0.0453679
	Planktophila versatilis	MsE-18	2-med3	21	505063	-0.0407114
	Planktophila versatilis	MsE-18	2-med3	21	358705	-0.0362334
	Planktophila versatilis	MsE-18	3-med4	1	28168.4	0.243999
	Planktophila versatilis	MsE-18	3-med4	1	25052.6	0.250894
	Planktophila versatilis	MsE-18	3-med4	1	27863.2	0.24464
	Planktophila versatilis	MsE-18	3-med4	4	62273.7	0.264446
	Planktophila versatilis	MsE-18	3-med4	4	54031.6	0.256197
	Planktophila versatilis	MsE-18	3-med4	4	41336.8	0.131483
	Planktophila versatilis	MsE-18	3-med4	8	259232	0.356546
	Planktophila versatilis	MsE-18	3-med4	8	407968	0.505405
	Planktophila versatilis	MsE-18	3-med4	8	1.16125e+06	0.833875
	Planktophila versatilis	MsE-18	3-med4	11	463779	0.193895
	Planktophila versatilis	MsE-18	3-med4	11	375568	-0.027583
	Planktophila versatilis	MsE-18	3-med4	11	1.16016e+06	-0.000314388
	Planktophila versatilis	MsE-18	3-med4	14	518937	0.0374581
	Planktophila versatilis	MsE-18	3-med4	14	364779	-0.00971637
	Planktophila versatilis	MsE-18	3-med4	14	1.63807e+06	0.114988
	Planktophila versatilis	MsE-18	3-med4	18	149400	-0.311289
	Planktophila versatilis	MsE-18	3-med4	18	258747	-0.0858598
	Planktophila versatilis	MsE-18	3-med4	18	1076000	-0.105068
	Planktophila versatilis	MsE-18	3-med4	21	153337	0.00866994
	Planktophila versatilis	MsE-18	3-med4	21	247653	-0.0146084
	Planktophila versatilis	MsE-18	3-med4	21	803168	-0.0974804
	Planktophila versatilis	MsE-18	5-MM	1	19326.3	0.26616
	Planktophila versatilis	MsE-18	5-MM	1	18736.8	0.267982
	Planktophila versatilis	MsE-18	5-MM	1	23157.9	0.25552
	Planktophila versatilis	MsE-18	5-MM	4	17968.4	-0.0242839
	Planktophila versatilis	MsE-18	5-MM	4	14810.5	-0.0783845
	Planktophila versatilis	MsE-18	5-MM	4	1052.63	-1.03035
	Planktophila versatilis	MsE-18	5-MM	8	10031.6	-0.145719
	Planktophila versatilis	MsE-18	5-MM	8	8631.58	-0.134978
	Planktophila versatilis	MsE-18	5-MM	8	7926.32	0.504724
	Planktophila versatilis	MsE-18	5-MM	11	9894.74	-0.00457834
	Planktophila versatilis	MsE-18	5-MM	11	6873.68	-0.0759091
	Planktophila versatilis	MsE-18	5-MM	11	8347.37	0.0172527
	Planktophila versatilis	MsE-18	5-MM	14	7231.58	-0.104515
	Planktophila versatilis	MsE-18	5-MM	14	3368.42	-0.237752
	Planktophila versatilis	MsE-18	5-MM	14	3936.84	-0.250522
	Planktophila versatilis	MsE-18	5-MM	18	4210.53	-0.135217
	Planktophila versatilis	MsE-18	5-MM	18	4842.11	0.0907264
	Planktophila versatilis	MsE-18	5-MM	18	4210.53	0.0168022
	Planktophila versatilis	MsE-18	5-MM	21	13684.2	0.392885
	Planktophila versatilis	MsE-18	5-MM	21	11652.6	0.292727
	Planktophila versatilis	MsE-18	5-MM	21	10178.9	0.294245
	Planktophila versatilis	MsE-18	6-med2+MM	1	19294.7	0.266256
	Planktophila versatilis	MsE-18	6-med2+MM	1	17610.5	0.271629
	Planktophila versatilis	MsE-18	6-med2+MM	1	17547.4	0.27184
	Planktophila versatilis	MsE-18	6-med2+MM	4	13757.9	-0.11274
	Planktophila versatilis	MsE-18	6-med2+MM	4	12768.4	-0.107174
	Planktophila versatilis	MsE-18	6-med2+MM	4	136.842	-1.61794
	Planktophila versatilis	MsE-18	6-med2+MM	8	11652.6	-0.0415202
	Planktophila versatilis	MsE-18	6-med2+MM	8	15231.6	0.044099
	Planktophila versatilis	MsE-18	6-med2+MM	8	11863.2	1.11559
	Planktophila versatilis	MsE-18	6-med2+MM	11	10031.6	-0.0499313
	Planktophila versatilis	MsE-18	6-med2+MM	11	10178.9	-0.13435
	Planktophila versatilis	MsE-18	6-med2+MM	11	11021.1	-0.0245434
	Planktophila versatilis	MsE-18	6-med2+MM	14	9400	-0.0216761
	Planktophila versatilis	MsE-18	6-med2+MM	14	9684.21	-0.0166083
	Planktophila versatilis	MsE-18	6-med2+MM	14	6663.16	-0.167738
	Planktophila versatilis	MsE-18	6-med2+MM	18	9189.47	-0.00566276
	Planktophila versatilis	MsE-18	6-med2+MM	18	7231.58	-0.0730098
	Planktophila versatilis	MsE-18	6-med2+MM	18	6031.58	-0.0248962
	Planktophila versatilis	MsE-18	6-med2+MM	21	10389.5	0.0409115
	Planktophila versatilis	MsE-18	6-med2+MM	21	12557.9	0.183964
	Planktophila versatilis	MsE-18	6-med2+MM	21	11863.2	0.225476
	Planktophila versatilis	MsE-18	7-10xmed2	1	23715.8	0.25412
	Planktophila versatilis	MsE-18	7-10xmed2	1	24978.9	0.251068
	Planktophila versatilis	MsE-18	7-10xmed2	1	26736.8	0.247067
	Planktophila versatilis	MsE-18	7-10xmed2	4	157821	0.631774
	Planktophila versatilis	MsE-18	7-10xmed2	4	160958	0.621036
	Planktophila versatilis	MsE-18	7-10xmed2	4	87347.4	0.394617
	Planktophila versatilis	MsE-18	7-10xmed2	8	2.24314e+06	0.663542
	Planktophila versatilis	MsE-18	7-10xmed2	8	2.07945e+06	0.639679
	Planktophila versatilis	MsE-18	7-10xmed2	8	2.25836e+06	0.813125
	Planktophila versatilis	MsE-18	7-10xmed2	11	5.11576e+06	0.274817
	Planktophila versatilis	MsE-18	7-10xmed2	11	5.01468e+06	0.293422
	Planktophila versatilis	MsE-18	7-10xmed2	11	5.19788e+06	0.277871
	Planktophila versatilis	MsE-18	7-10xmed2	14	7.31841e+06	0.119356
	Planktophila versatilis	MsE-18	7-10xmed2	14	7.45635e+06	0.132232
	Planktophila versatilis	MsE-18	7-10xmed2	14	7.64014e+06	0.128388
	Planktophila versatilis	MsE-18	7-10xmed2	18	9.13658e+06	0.0554732
	Planktophila versatilis	MsE-18	7-10xmed2	18	8.94727e+06	0.0455708
	Planktophila versatilis	MsE-18	7-10xmed2	18	9.39655e+06	0.0517317
	Planktophila versatilis	MsE-18	7-10xmed2	21	8.56298e+06	-0.0216126
	Planktophila versatilis	MsE-18	7-10xmed2	21	8.25244e+06	-0.0269466
	Planktophila versatilis	MsE-18	7-10xmed2	21	7.47792e+06	-0.0761294
	Planktophila versatilis	MsE-18	8-10xmed3	1	26178.9	0.248307
	Planktophila versatilis	MsE-18	8-10xmed3	1	14947.4	0.281273
	Planktophila versatilis	MsE-18	8-10xmed3	1	26894.7	0.246721
	Planktophila versatilis	MsE-18	8-10xmed3	4	114558	0.492042
	Planktophila versatilis	MsE-18	8-10xmed3	4	82736.8	0.570377
	Planktophila versatilis	MsE-18	8-10xmed3	4	111863	0.475115
	Planktophila versatilis	MsE-18	8-10xmed3	8	2.98472e+06	0.815045
	Planktophila versatilis	MsE-18	8-10xmed3	8	2.63833e+06	0.865559
	Planktophila versatilis	MsE-18	8-10xmed3	8	2.96529e+06	0.819364
	Planktophila versatilis	MsE-18	8-10xmed3	11	6.31203e+06	0.249651
	Planktophila versatilis	MsE-18	8-10xmed3	11	6.19955e+06	0.284777
	Planktophila versatilis	MsE-18	8-10xmed3	11	6.35987e+06	0.254344
	Planktophila versatilis	MsE-18	8-10xmed3	14	8.49466e+06	0.0989935
	Planktophila versatilis	MsE-18	8-10xmed3	14	8.32994e+06	0.0984599
	Planktophila versatilis	MsE-18	8-10xmed3	14	7.91193e+06	0.0727876
	Planktophila versatilis	MsE-18	8-10xmed3	18	1.03776e+07	0.0500531
	Planktophila versatilis	MsE-18	8-10xmed3	18	1.01614e+07	0.0496841
	Planktophila versatilis	MsE-18	8-10xmed3	18	9.87007e+06	0.055284
	Planktophila versatilis	MsE-18	8-10xmed3	21	1.03627e+07	-0.000479108
	Planktophila versatilis	MsE-18	8-10xmed3	21	9.80551e+06	-0.0118827
	Planktophila versatilis	MsE-18	8-10xmed3	21	9.10563e+06	-0.0268714
	Planktophila versatilis	MsE-18	9-10xmed4	1	41336.8	0.221437
	Planktophila versatilis	MsE-18	9-10xmed4	1	25768.4	0.249237
	Planktophila versatilis	MsE-18	9-10xmed4	1	27063.2	0.246353
	Planktophila versatilis	MsE-18	9-10xmed4	4	175789	0.482511
	Planktophila versatilis	MsE-18	9-10xmed4	4	136705	0.556226
	Planktophila versatilis	MsE-18	9-10xmed4	4	129537	0.521931
	Planktophila versatilis	MsE-18	9-10xmed4	8	3966600	0.779094
	Planktophila versatilis	MsE-18	9-10xmed4	8	3365200	0.800854
	Planktophila versatilis	MsE-18	9-10xmed4	8	3.20984e+06	0.802503
	Planktophila versatilis	MsE-18	9-10xmed4	11	8.95855e+06	0.271566
	Planktophila versatilis	MsE-18	9-10xmed4	11	8.33168e+06	0.302193
	Planktophila versatilis	MsE-18	9-10xmed4	11	7.82054e+06	0.296844
	Planktophila versatilis	MsE-18	9-10xmed4	14	1.54679e+07	0.182053
	Planktophila versatilis	MsE-18	9-10xmed4	14	1.47556e+07	0.190518
	Planktophila versatilis	MsE-18	9-10xmed4	14	1.37703e+07	0.188587
	Planktophila versatilis	MsE-18	9-10xmed4	18	29045200	0.157521
	Planktophila versatilis	MsE-18	9-10xmed4	18	29135500	0.170084
	Planktophila versatilis	MsE-18	9-10xmed4	18	29383300	0.189478
	Planktophila versatilis	MsE-18	9-10xmed4	21	29375800	0.00377266
	Planktophila versatilis	MsE-18	9-10xmed4	21	29249400	0.00130057
	Planktophila versatilis	MsE-18	9-10xmed4	21	27616000	-0.0206771
	Allorhodoferax lacus	MsE-M18	0-all-media	0	16706.4
	Allorhodoferax lacus	MsE-M18	1-med2	1	134453	2.08542
	Allorhodoferax lacus	MsE-M18	1-med2	1	157579	2.24413
	Allorhodoferax lacus	MsE-M18	1-med2	1	185589	2.40774
	Allorhodoferax lacus	MsE-M18	1-med2	3	3.03378e+06	1.55818
	Allorhodoferax lacus	MsE-M18	1-med2	3	2.45633e+06	1.37325
	Allorhodoferax lacus	MsE-M18	1-med2	3	3.71706e+06	1.49858
	Allorhodoferax lacus	MsE-M18	1-med2	7	1.20999e+07	0.345848
	Allorhodoferax lacus	MsE-M18	1-med2	7	1.11715e+07	0.378674
	Allorhodoferax lacus	MsE-M18	1-med2	7	1.03565e+07	0.25617
	Allorhodoferax lacus	MsE-M18	1-med2	10	1.11593e+07	-0.0269774
	Allorhodoferax lacus	MsE-M18	1-med2	10	1.11216e+07	-0.00149146
	Allorhodoferax lacus	MsE-M18	1-med2	10	1.09872e+07	0.0197063
	Allorhodoferax lacus	MsE-M18	1-med2	14	1.11808e+07	0.00048273
	Allorhodoferax lacus	MsE-M18	1-med2	14	1.10749e+07	-0.00105114
	Allorhodoferax lacus	MsE-M18	1-med2	14	1.10293e+07	0.000954788
	Allorhodoferax lacus	MsE-M18	1-med2	17	1.101e+07	-0.00513326
	Allorhodoferax lacus	MsE-M18	1-med2	17	1.11871e+07	0.00335813
	Allorhodoferax lacus	MsE-M18	1-med2	17	1.07551e+07	-0.00839212
	Allorhodoferax lacus	MsE-M18	2-med3	1	88094.7	1.66262
	Allorhodoferax lacus	MsE-M18	2-med3	1	204926	2.50686
	Allorhodoferax lacus	MsE-M18	2-med3	1	206000	2.51208
	Allorhodoferax lacus	MsE-M18	2-med3	3	3.35784e+06	1.82032
	Allorhodoferax lacus	MsE-M18	2-med3	3	4.51129e+06	1.54584
	Allorhodoferax lacus	MsE-M18	2-med3	3	3.94899e+06	1.47667
	Allorhodoferax lacus	MsE-M18	2-med3	7	1.62641e+07	0.394415
	Allorhodoferax lacus	MsE-M18	2-med3	7	1.65431e+07	0.324846
	Allorhodoferax lacus	MsE-M18	2-med3	7	1.58763e+07	0.347842
	Allorhodoferax lacus	MsE-M18	2-med3	10	2.37543e+08	0.893797
	Allorhodoferax lacus	MsE-M18	2-med3	10	2.01463e+08	0.833213
	Allorhodoferax lacus	MsE-M18	2-med3	10	2.14731e+08	0.868186
	Allorhodoferax lacus	MsE-M18	2-med3	14	3.78179e+07	-0.459392
	Allorhodoferax lacus	MsE-M18	2-med3	14	3.03126e+07	-0.473511
	Allorhodoferax lacus	MsE-M18	2-med3	14	4.75095e+07	-0.377114
	Allorhodoferax lacus	MsE-M18	2-med3	17	1.05295e+07	-0.426201
	Allorhodoferax lacus	MsE-M18	2-med3	17	2.95095e+07	-0.00895105
	Allorhodoferax lacus	MsE-M18	2-med3	17	3.15653e+07	-0.136291
	Allorhodoferax lacus	MsE-M18	3-med4	1	207295	2.51835
	Allorhodoferax lacus	MsE-M18	3-med4	1	251800	2.71284
	Allorhodoferax lacus	MsE-M18	3-med4	1	268642	2.77759
	Allorhodoferax lacus	MsE-M18	3-med4	3	4.86723e+06	1.57807
	Allorhodoferax lacus	MsE-M18	3-med4	3	4.78096e+06	1.47188
	Allorhodoferax lacus	MsE-M18	3-med4	3	5.71763e+06	1.52896
	Allorhodoferax lacus	MsE-M18	3-med4	7	2.72421e+07	0.43056
	Allorhodoferax lacus	MsE-M18	3-med4	7	2.44438e+07	0.407934
	Allorhodoferax lacus	MsE-M18	3-med4	7	2.55217e+07	0.373993
	Allorhodoferax lacus	MsE-M18	3-med4	10	3.88946e+08	0.886226
	Allorhodoferax lacus	MsE-M18	3-med4	10	3.13386e+08	0.850353
	Allorhodoferax lacus	MsE-M18	3-med4	10	3.33631e+08	0.856835
	Allorhodoferax lacus	MsE-M18	3-med4	14	3.98811e+07	-0.569385
	Allorhodoferax lacus	MsE-M18	3-med4	14	28480000	-0.599559
	Allorhodoferax lacus	MsE-M18	3-med4	14	3.59379e+07	-0.55706
	Allorhodoferax lacus	MsE-M18	3-med4	17	2.50832e+07	-0.154568
	Allorhodoferax lacus	MsE-M18	3-med4	17	3.06011e+07	0.0239441
	Allorhodoferax lacus	MsE-M18	3-med4	17	2.83158e+07	-0.0794576
	Allorhodoferax lacus	MsE-M18	5-MM	1	34389.5	0.721957
	Allorhodoferax lacus	MsE-M18	5-MM	1	32284.2	0.658784
	Allorhodoferax lacus	MsE-M18	5-MM	1	32010.5	0.650271
	Allorhodoferax lacus	MsE-M18	5-MM	3	36136.8	0.0247812
	Allorhodoferax lacus	MsE-M18	5-MM	3	32073.7	-0.00327119
	Allorhodoferax lacus	MsE-M18	5-MM	3	36915.8	0.0712873
	Allorhodoferax lacus	MsE-M18	5-MM	7	21831.6	-0.125989
	Allorhodoferax lacus	MsE-M18	5-MM	7	24421.1	-0.0681476
	Allorhodoferax lacus	MsE-M18	5-MM	7	23789.5	-0.109849
	Allorhodoferax lacus	MsE-M18	5-MM	10	23715.8	0.0275945
	Allorhodoferax lacus	MsE-M18	5-MM	10	12768.4	-0.216157
	Allorhodoferax lacus	MsE-M18	5-MM	10	15368.4	-0.145643
	Allorhodoferax lacus	MsE-M18	5-MM	14	16631.6	-0.0887095
	Allorhodoferax lacus	MsE-M18	5-MM	14	17547.4	0.0794822
	Allorhodoferax lacus	MsE-M18	5-MM	14	21273.7	0.081289
	Allorhodoferax lacus	MsE-M18	5-MM	17	12557.9	-0.0936512
	Allorhodoferax lacus	MsE-M18	5-MM	17	15084.2	-0.0504185
	Allorhodoferax lacus	MsE-M18	5-MM	17	15231.6	-0.111367
	Allorhodoferax lacus	MsE-M18	6-med2+MM	1	175737	2.35319
	Allorhodoferax lacus	MsE-M18	6-med2+MM	1	193316	2.44853
	Allorhodoferax lacus	MsE-M18	6-med2+MM	1	186105	2.41052
	Allorhodoferax lacus	MsE-M18	6-med2+MM	3	2.78247e+06	1.38105
	Allorhodoferax lacus	MsE-M18	6-med2+MM	3	3.23656e+06	1.40897
	Allorhodoferax lacus	MsE-M18	6-med2+MM	3	2.33902e+06	1.26559
	Allorhodoferax lacus	MsE-M18	6-med2+MM	7	1.04069e+07	0.329783
	Allorhodoferax lacus	MsE-M18	6-med2+MM	7	9.72151e+06	0.274958
	Allorhodoferax lacus	MsE-M18	6-med2+MM	7	8.11186e+06	0.310899
	Allorhodoferax lacus	MsE-M18	6-med2+MM	10	1.02381e+07	-0.00545064
	Allorhodoferax lacus	MsE-M18	6-med2+MM	10	9.14419e+06	-0.0204073
	Allorhodoferax lacus	MsE-M18	6-med2+MM	10	9.35727e+06	0.0476088
	Allorhodoferax lacus	MsE-M18	6-med2+MM	14	9.73842e+06	-0.0125104
	Allorhodoferax lacus	MsE-M18	6-med2+MM	14	1.16574e+07	0.060705
	Allorhodoferax lacus	MsE-M18	6-med2+MM	14	7482000	-0.0559135
	Allorhodoferax lacus	MsE-M18	6-med2+MM	17	9405800	-0.0115842
	Allorhodoferax lacus	MsE-M18	6-med2+MM	17	1.16824e+07	0.000715592
	Allorhodoferax lacus	MsE-M18	6-med2+MM	17	7.69669e+06	0.00943028
	Allorhodoferax lacus	MsE-M18	7-10xmed2	1	247042	2.69376
	Allorhodoferax lacus	MsE-M18	7-10xmed2	1	216905	2.56367
	Allorhodoferax lacus	MsE-M18	7-10xmed2	1	210611	2.53422
	Allorhodoferax lacus	MsE-M18	7-10xmed2	3	2.16199e+06	1.08461
	Allorhodoferax lacus	MsE-M18	7-10xmed2	3	4.11025e+06	1.47089
	Allorhodoferax lacus	MsE-M18	7-10xmed2	3	4.37914e+06	1.5173
	Allorhodoferax lacus	MsE-M18	7-10xmed2	7	1.18461e+07	0.425242
	Allorhodoferax lacus	MsE-M18	7-10xmed2	7	1.28089e+07	0.284164
	Allorhodoferax lacus	MsE-M18	7-10xmed2	7	1.54345e+07	0.314938
	Allorhodoferax lacus	MsE-M18	7-10xmed2	10	1.76857e+07	0.133587
	Allorhodoferax lacus	MsE-M18	7-10xmed2	10	2.44468e+07	0.215453
	Allorhodoferax lacus	MsE-M18	7-10xmed2	10	2.36141e+07	0.141747
	Allorhodoferax lacus	MsE-M18	7-10xmed2	14	38940000	0.197317
	Allorhodoferax lacus	MsE-M18	7-10xmed2	14	1.30495e+07	-0.156938
	Allorhodoferax lacus	MsE-M18	7-10xmed2	14	1.90284e+07	-0.0539776
	Allorhodoferax lacus	MsE-M18	7-10xmed2	17	8.26305e+06	-0.516743
	Allorhodoferax lacus	MsE-M18	7-10xmed2	17	1.53996e+07	0.0551975
	Allorhodoferax lacus	MsE-M18	7-10xmed2	17	1.34568e+07	-0.115482
	Allorhodoferax lacus	MsE-M18	8-10xmed3	1	226895	2.60869
	Allorhodoferax lacus	MsE-M18	8-10xmed3	1	177768	2.36469
	Allorhodoferax lacus	MsE-M18	8-10xmed3	1	231042	2.62681
	Allorhodoferax lacus	MsE-M18	8-10xmed3	3	2.56607e+06	1.21282
	Allorhodoferax lacus	MsE-M18	8-10xmed3	3	2.87391e+06	1.39147
	Allorhodoferax lacus	MsE-M18	8-10xmed3	3	2.65788e+06	1.22134
	Allorhodoferax lacus	MsE-M18	8-10xmed3	7	1.41388e+07	0.426636
	Allorhodoferax lacus	MsE-M18	8-10xmed3	7	1.45713e+07	0.405845
	Allorhodoferax lacus	MsE-M18	8-10xmed3	7	1.24273e+07	0.385591
	Allorhodoferax lacus	MsE-M18	8-10xmed3	10	2.36342e+08	0.938786
	Allorhodoferax lacus	MsE-M18	8-10xmed3	10	1.85381e+08	0.847787
	Allorhodoferax lacus	MsE-M18	8-10xmed3	10	2.13748e+08	0.948301
	Allorhodoferax lacus	MsE-M18	8-10xmed3	14	2.77916e+07	-0.535137
	Allorhodoferax lacus	MsE-M18	8-10xmed3	14	3.47442e+07	-0.4186
	Allorhodoferax lacus	MsE-M18	8-10xmed3	14	1.56316e+07	-0.653877
	Allorhodoferax lacus	MsE-M18	8-10xmed3	17	2.48674e+07	-0.0370589
	Allorhodoferax lacus	MsE-M18	8-10xmed3	17	2.84147e+07	-0.067035
	Allorhodoferax lacus	MsE-M18	8-10xmed3	17	2.01684e+07	0.0849416
	Allorhodoferax lacus	MsE-M18	9-10xmed4	1	310453	2.92224
	Allorhodoferax lacus	MsE-M18	9-10xmed4	1	308747	2.91673
	Allorhodoferax lacus	MsE-M18	9-10xmed4	1	329274	2.9811
	Allorhodoferax lacus	MsE-M18	9-10xmed4	3	2.73581e+07	2.23937
	Allorhodoferax lacus	MsE-M18	9-10xmed4	3	2.06647e+07	2.10183
	Allorhodoferax lacus	MsE-M18	9-10xmed4	3	2.74894e+07	2.21233
	Allorhodoferax lacus	MsE-M18	9-10xmed4	7	9.29447e+07	0.305748
	Allorhodoferax lacus	MsE-M18	9-10xmed4	7	1.0351e+08	0.40281
	Allorhodoferax lacus	MsE-M18	9-10xmed4	7	8.74721e+07	0.28938
	Allorhodoferax lacus	MsE-M18	9-10xmed4	10	1.39474e+09	0.90282
	Allorhodoferax lacus	MsE-M18	9-10xmed4	10	2.32293e+08	0.269445
	Allorhodoferax lacus	MsE-M18	9-10xmed4	10	1.73437e+09	0.995693
	Allorhodoferax lacus	MsE-M18	9-10xmed4	14	2.36141e+08	-0.444009
	Allorhodoferax lacus	MsE-M18	9-10xmed4	14	2.92149e+08	0.0573169
	Allorhodoferax lacus	MsE-M18	9-10xmed4	14	1.77102e+08	-0.570418
	Allorhodoferax lacus	MsE-M18	9-10xmed4	17	2.39909e+08	0.00527745
	Allorhodoferax lacus	MsE-M18	9-10xmed4	17	1.76435e+08	-0.168105
	Allorhodoferax lacus	MsE-M18	9-10xmed4	17	1.43805e+08	-0.0694221
	Rhabdaerophilum aquaticum	MsE-M23	0-all-media	0	1629.39
	Rhabdaerophilum aquaticum	MsE-M23	1-med2	1	28494.7	#DIV/0!
	Rhabdaerophilum aquaticum	MsE-M23	1-med2	1	25757.9	#DIV/0!
	Rhabdaerophilum aquaticum	MsE-M23	1-med2	1	31157.9	#DIV/0!
	Rhabdaerophilum aquaticum	MsE-M23	1-med2	5	92705.3	0.294926
	Rhabdaerophilum aquaticum	MsE-M23	1-med2	5	166105	0.46597
	Rhabdaerophilum aquaticum	MsE-M23	1-med2	5	72494.7	0.211112
	Rhabdaerophilum aquaticum	MsE-M23	1-med2	8	119179	0.0837336
	Rhabdaerophilum aquaticum	MsE-M23	1-med2	8	154526	-0.0240858
	Rhabdaerophilum aquaticum	MsE-M23	1-med2	8	305432	0.479404
	Rhabdaerophilum aquaticum	MsE-M23	1-med2	11	126389	0.0195807
	Rhabdaerophilum aquaticum	MsE-M23	1-med2	11	166821	0.0255191
	Rhabdaerophilum aquaticum	MsE-M23	1-med2	11	269842	-0.0412963
	Rhabdaerophilum aquaticum	MsE-M23	1-med2	18	182389	0.0523966
	Rhabdaerophilum aquaticum	MsE-M23	1-med2	18	149137	-0.0160082
	Rhabdaerophilum aquaticum	MsE-M23	1-med2	18	232505	-0.0212749
	Rhabdaerophilum aquaticum	MsE-M23	1-med2	21	168316	-0.0267675
	Rhabdaerophilum aquaticum	MsE-M23	1-med2	21	16136.8	-0.741253
	Rhabdaerophilum aquaticum	MsE-M23	1-med2	21	108684	-0.253489
	Rhabdaerophilum aquaticum	MsE-M23	1-med2	25	6031.58	-0.832208
	Rhabdaerophilum aquaticum	MsE-M23	1-med2	25	2031.58	-0.518073
	Rhabdaerophilum aquaticum	MsE-M23	1-med2	25	8421.05	-0.639428
	Rhabdaerophilum aquaticum	MsE-M23	2-med3	1	26873.7	#DIV/0!
	Rhabdaerophilum aquaticum	MsE-M23	2-med3	1	22452.6	#DIV/0!
	Rhabdaerophilum aquaticum	MsE-M23	2-med3	1	25189.5	#DIV/0!
	Rhabdaerophilum aquaticum	MsE-M23	2-med3	5	87726.3	0.295769
	Rhabdaerophilum aquaticum	MsE-M23	2-med3	5	143516	0.463759
	Rhabdaerophilum aquaticum	MsE-M23	2-med3	5	71789.5	0.261828
	Rhabdaerophilum aquaticum	MsE-M23	2-med3	8	130042	0.131212
	Rhabdaerophilum aquaticum	MsE-M23	2-med3	8	121263	-0.0561607
	Rhabdaerophilum aquaticum	MsE-M23	2-med3	8	132074	0.203207
	Rhabdaerophilum aquaticum	MsE-M23	2-med3	11	159789	0.0686663
	Rhabdaerophilum aquaticum	MsE-M23	2-med3	11	91084.2	-0.0953929
	Rhabdaerophilum aquaticum	MsE-M23	2-med3	11	111263	-0.0571539
	Rhabdaerophilum aquaticum	MsE-M23	2-med3	18	248284	0.0629596
	Rhabdaerophilum aquaticum	MsE-M23	2-med3	18	106874	0.0228376
	Rhabdaerophilum aquaticum	MsE-M23	2-med3	18	198874	0.0829674
	Rhabdaerophilum aquaticum	MsE-M23	2-med3	21	94873.7	-0.320676
	Rhabdaerophilum aquaticum	MsE-M23	2-med3	21	40284.2	-0.325229
	Rhabdaerophilum aquaticum	MsE-M23	2-med3	21	48915.8	-0.467523
	Rhabdaerophilum aquaticum	MsE-M23	2-med3	25	5189.47	-0.726479
	Rhabdaerophilum aquaticum	MsE-M23	2-med3	25	3505.26	-0.610423
	Rhabdaerophilum aquaticum	MsE-M23	2-med3	25	2178.95	-0.777815
	Rhabdaerophilum aquaticum	MsE-M23	3-med4	1	26168.4	#DIV/0!
	Rhabdaerophilum aquaticum	MsE-M23	3-med4	1	20842.1	#DIV/0!
	Rhabdaerophilum aquaticum	MsE-M23	3-med4	1	21263.2	#DIV/0!
	Rhabdaerophilum aquaticum	MsE-M23	3-med4	5	391947	0.676644
	Rhabdaerophilum aquaticum	MsE-M23	3-med4	5	280632	0.650017
	Rhabdaerophilum aquaticum	MsE-M23	3-med4	5	252653	0.61876
	Rhabdaerophilum aquaticum	MsE-M23	3-med4	8	532768	0.10232
	Rhabdaerophilum aquaticum	MsE-M23	3-med4	8	654968	0.282515
	Rhabdaerophilum aquaticum	MsE-M23	3-med4	8	670737	0.325454
	Rhabdaerophilum aquaticum	MsE-M23	3-med4	11	99315.8	-0.559927
	Rhabdaerophilum aquaticum	MsE-M23	3-med4	11	125474	-0.55083
	Rhabdaerophilum aquaticum	MsE-M23	3-med4	11	171232	-0.45512
	Rhabdaerophilum aquaticum	MsE-M23	3-med4	18	11578.9	-0.307017
	Rhabdaerophilum aquaticum	MsE-M23	3-med4	18	15578.9	-0.298025
	Rhabdaerophilum aquaticum	MsE-M23	3-med4	18	89978.9	-0.0919202
	Rhabdaerophilum aquaticum	MsE-M23	3-med4	21	6315.79	-0.202045
	Rhabdaerophilum aquaticum	MsE-M23	3-med4	21	62105.3	0.46097
	Rhabdaerophilum aquaticum	MsE-M23	3-med4	21	40094.7	-0.269444
	Rhabdaerophilum aquaticum	MsE-M23	3-med4	25	3157.89	-0.173287
	Rhabdaerophilum aquaticum	MsE-M23	3-med4	25	3652.63	-0.708346
	Rhabdaerophilum aquaticum	MsE-M23	3-med4	25	2526.32	-0.691121
	Rhabdaerophilum aquaticum	MsE-M23	5-MM	1	21610.5	#DIV/0!
	Rhabdaerophilum aquaticum	MsE-M23	5-MM	1	22873.7	#DIV/0!
	Rhabdaerophilum aquaticum	MsE-M23	5-MM	1	20421.1	#DIV/0!
	Rhabdaerophilum aquaticum	MsE-M23	5-MM	5	32631.6	0.103025
	Rhabdaerophilum aquaticum	MsE-M23	5-MM	5	53336.8	0.21166
	Rhabdaerophilum aquaticum	MsE-M23	5-MM	5	43157.9	0.187075
	Rhabdaerophilum aquaticum	MsE-M23	5-MM	8	33484.2	0.00859783
	Rhabdaerophilum aquaticum	MsE-M23	5-MM	8	41473.7	-0.0838561
	Rhabdaerophilum aquaticum	MsE-M23	5-MM	8	45547.4	0.0179625
	Rhabdaerophilum aquaticum	MsE-M23	5-MM	11	21273.7	-0.151201
	Rhabdaerophilum aquaticum	MsE-M23	5-MM	11	18294.7	-0.272815
	Rhabdaerophilum aquaticum	MsE-M23	5-MM	11	33621.1	-0.1012
	Rhabdaerophilum aquaticum	MsE-M23	5-MM	18	2600	-0.30028
	Rhabdaerophilum aquaticum	MsE-M23	5-MM	18	3231.58	-0.247663
	Rhabdaerophilum aquaticum	MsE-M23	5-MM	18	44073.7	0.0386729
	Rhabdaerophilum aquaticum	MsE-M23	5-MM	21	2221.05	-0.0525101
	Rhabdaerophilum aquaticum	MsE-M23	5-MM	21	8073.68	0.305213
	Rhabdaerophilum aquaticum	MsE-M23	5-MM	21	39578.9	-0.0358552
	Rhabdaerophilum aquaticum	MsE-M23	5-MM	25	1263.16	-0.141092
	Rhabdaerophilum aquaticum	MsE-M23	5-MM	25	1968.42	-0.352845
	Rhabdaerophilum aquaticum	MsE-M23	5-MM	25	1336.84	-0.846997
	Rhabdaerophilum aquaticum	MsE-M23	6-med2+MM	1	11652.6	#DIV/0!
	Rhabdaerophilum aquaticum	MsE-M23	6-med2+MM	1	16000	#DIV/0!
	Rhabdaerophilum aquaticum	MsE-M23	6-med2+MM	1	15442.1	#DIV/0!
	Rhabdaerophilum aquaticum	MsE-M23	6-med2+MM	5	7652.63	-0.105121
	Rhabdaerophilum aquaticum	MsE-M23	6-med2+MM	5	13126.3	-0.0494924
	Rhabdaerophilum aquaticum	MsE-M23	6-med2+MM	5	27368.4	0.143073
	Rhabdaerophilum aquaticum	MsE-M23	6-med2+MM	8	31294.7	0.469467
	Rhabdaerophilum aquaticum	MsE-M23	6-med2+MM	8	24768.4	0.21165
	Rhabdaerophilum aquaticum	MsE-M23	6-med2+MM	8	24852.6	-0.0321421
	Rhabdaerophilum aquaticum	MsE-M23	6-med2+MM	11	8305.26	-0.442187
	Rhabdaerophilum aquaticum	MsE-M23	6-med2+MM	11	13547.4	-0.201126
	Rhabdaerophilum aquaticum	MsE-M23	6-med2+MM	11	20494.7	-0.0642652
	Rhabdaerophilum aquaticum	MsE-M23	6-med2+MM	18	10031.6	0.0269784
	Rhabdaerophilum aquaticum	MsE-M23	6-med2+MM	18	12978.9	-0.00612339
	Rhabdaerophilum aquaticum	MsE-M23	6-med2+MM	18	46126.3	0.115888
	Rhabdaerophilum aquaticum	MsE-M23	6-med2+MM	21	4073.68	-0.300397
	Rhabdaerophilum aquaticum	MsE-M23	6-med2+MM	21	9400	-0.10754
	Rhabdaerophilum aquaticum	MsE-M23	6-med2+MM	21	25400	-0.198878
	Rhabdaerophilum aquaticum	MsE-M23	6-med2+MM	25	2105.26	-0.165027
	Rhabdaerophilum aquaticum	MsE-M23	6-med2+MM	25	484.211	-0.741486
	Rhabdaerophilum aquaticum	MsE-M23	6-med2+MM	25	631.579	-0.92357
	Rhabdaerophilum aquaticum	MsE-M23	7-10xmed2	1	18663.2	#DIV/0!
	Rhabdaerophilum aquaticum	MsE-M23	7-10xmed2	1	17968.4	#DIV/0!
	Rhabdaerophilum aquaticum	MsE-M23	7-10xmed2	1	17336.8	#DIV/0!
	Rhabdaerophilum aquaticum	MsE-M23	7-10xmed2	5	51294.7	0.252759
	Rhabdaerophilum aquaticum	MsE-M23	7-10xmed2	5	85473.7	0.389898
	Rhabdaerophilum aquaticum	MsE-M23	7-10xmed2	5	105632	0.451781
	Rhabdaerophilum aquaticum	MsE-M23	7-10xmed2	8	67505.3	0.0915391
	Rhabdaerophilum aquaticum	MsE-M23	7-10xmed2	8	104211	0.0660682
	Rhabdaerophilum aquaticum	MsE-M23	7-10xmed2	8	118116	0.037236
	Rhabdaerophilum aquaticum	MsE-M23	7-10xmed2	11	39621.1	-0.177615
	Rhabdaerophilum aquaticum	MsE-M23	7-10xmed2	11	59389.5	-0.187432
	Rhabdaerophilum aquaticum	MsE-M23	7-10xmed2	11	63452.6	-0.207124
	Rhabdaerophilum aquaticum	MsE-M23	7-10xmed2	18	80168.4	0.100681
	Rhabdaerophilum aquaticum	MsE-M23	7-10xmed2	18	26105.3	-0.117426
	Rhabdaerophilum aquaticum	MsE-M23	7-10xmed2	18	216768	0.175505
	Rhabdaerophilum aquaticum	MsE-M23	7-10xmed2	21	49978.9	-0.157509
	Rhabdaerophilum aquaticum	MsE-M23	7-10xmed2	21	92347.4	0.42114
	Rhabdaerophilum aquaticum	MsE-M23	7-10xmed2	21	27789.5	-0.684724
	Rhabdaerophilum aquaticum	MsE-M23	7-10xmed2	25	20000	-0.228967
	Rhabdaerophilum aquaticum	MsE-M23	7-10xmed2	25	915.789	-1.15338
	Rhabdaerophilum aquaticum	MsE-M23	7-10xmed2	25	3715.79	-0.503017
	Rhabdaerophilum aquaticum	MsE-M23	8-10xmed3	1	17547.4	#DIV/0!
	Rhabdaerophilum aquaticum	MsE-M23	8-10xmed3	1	16073.7	#DIV/0!
	Rhabdaerophilum aquaticum	MsE-M23	8-10xmed3	1	16842.1	#DIV/0!
	Rhabdaerophilum aquaticum	MsE-M23	8-10xmed3	5	73610.5	0.358471
	Rhabdaerophilum aquaticum	MsE-M23	8-10xmed3	5	76284.2	0.389321
	Rhabdaerophilum aquaticum	MsE-M23	8-10xmed3	5	81610.5	0.394519
	Rhabdaerophilum aquaticum	MsE-M23	8-10xmed3	8	92010.5	0.0743717
	Rhabdaerophilum aquaticum	MsE-M23	8-10xmed3	8	178737	0.283816
	Rhabdaerophilum aquaticum	MsE-M23	8-10xmed3	8	156368	0.216752
	Rhabdaerophilum aquaticum	MsE-M23	8-10xmed3	11	57894.7	-0.154426
	Rhabdaerophilum aquaticum	MsE-M23	8-10xmed3	11	67926.3	-0.322497
	Rhabdaerophilum aquaticum	MsE-M23	8-10xmed3	11	96136.8	-0.162147
	Rhabdaerophilum aquaticum	MsE-M23	8-10xmed3	18	85821.1	0.056234
	Rhabdaerophilum aquaticum	MsE-M23	8-10xmed3	18	106600	0.06438
	Rhabdaerophilum aquaticum	MsE-M23	8-10xmed3	18
	Rhabdaerophilum aquaticum	MsE-M23	8-10xmed3	21	106600	0.0722731
	Rhabdaerophilum aquaticum	MsE-M23	8-10xmed3	21	194211	0.199953
	Rhabdaerophilum aquaticum	MsE-M23	8-10xmed3	21	161611
	Rhabdaerophilum aquaticum	MsE-M23	8-10xmed3	25	5968.42	-0.72065
	Rhabdaerophilum aquaticum	MsE-M23	8-10xmed3	25	1263.16	-1.25883
	Rhabdaerophilum aquaticum	MsE-M23	8-10xmed3	25	2736.84	-1.0196
	Rhabdaerophilum aquaticum	MsE-M23	9-10xmed4	1	20421.1	#DIV/0!
	Rhabdaerophilum aquaticum	MsE-M23	9-10xmed4	1	22115.8	#DIV/0!
	Rhabdaerophilum aquaticum	MsE-M23	9-10xmed4	1	19021.1	#DIV/0!
	Rhabdaerophilum aquaticum	MsE-M23	9-10xmed4	5	327105	0.693429
	Rhabdaerophilum aquaticum	MsE-M23	9-10xmed4	5	304105	0.655271
	Rhabdaerophilum aquaticum	MsE-M23	9-10xmed4	5	386600	0.752961
	Rhabdaerophilum aquaticum	MsE-M23	9-10xmed4	8	1.09677e+06	0.40328
	Rhabdaerophilum aquaticum	MsE-M23	9-10xmed4	8	905968	0.363877
	Rhabdaerophilum aquaticum	MsE-M23	9-10xmed4	8	1.25515e+06	0.392539
	Rhabdaerophilum aquaticum	MsE-M23	9-10xmed4	11	643295	-0.17784
	Rhabdaerophilum aquaticum	MsE-M23	9-10xmed4	11	988242	0.0289744
	Rhabdaerophilum aquaticum	MsE-M23	9-10xmed4	11	1085400	-0.0484348
	Rhabdaerophilum aquaticum	MsE-M23	9-10xmed4	18	1.72326e+06	0.140767
	Rhabdaerophilum aquaticum	MsE-M23	9-10xmed4	18	1.50453e+06	0.0600437
	Rhabdaerophilum aquaticum	MsE-M23	9-10xmed4	18
	Rhabdaerophilum aquaticum	MsE-M23	9-10xmed4	21	96284.2	-0.961557
	Rhabdaerophilum aquaticum	MsE-M23	9-10xmed4	21	236274	-0.617081
	Rhabdaerophilum aquaticum	MsE-M23	9-10xmed4	21	189895
	Rhabdaerophilum aquaticum	MsE-M23	9-10xmed4	25	32557.9	-0.271071
	Rhabdaerophilum aquaticum	MsE-M23	9-10xmed4	25	42810.5	-0.427052
	Rhabdaerophilum aquaticum	MsE-M23	9-10xmed4	25	21126.3	-0.548988
	Planktophila dulcis	MsH-2	1-med2	1	66810.5
	Planktophila dulcis	MsH-2	1-med2	4	38663.2	-0.182324
	Planktophila dulcis	MsH-2	1-med2	8	98915.8	0.234845
	Planktophila dulcis	MsH-2	1-med2	11	98421.1	-0.00167138
	Planktophila dulcis	MsH-2	1-med2	15	108979	0.025475
	Planktophila dulcis	MsH-2	1-med2	18	102211	-0.0213734
	Planktophila dulcis	MsH-2	1-med2	22	147874	0.0923309
	Planktophila dulcis	MsH-2	1-med2	29	220442	0.0570395
	Planktophila dulcis	MsH-2	1-med2	43	124811	-0.0406313
	Planktophila dulcis	MsH-2	2-med3	1	49863.2
	Planktophila dulcis	MsH-2	2-med3	4	34284.2	-0.124866
	Planktophila dulcis	MsH-2	2-med3	8	91926.3	0.246576
	Planktophila dulcis	MsH-2	2-med3	11	90915.8	-0.00368455
	Planktophila dulcis	MsH-2	2-med3	15	94600	0.00993095
	Planktophila dulcis	MsH-2	2-med3	18	81547.4	-0.0494911
	Planktophila dulcis	MsH-2	2-med3	22	114705	0.0852955
	Planktophila dulcis	MsH-2	2-med3	29	94347.4	-0.0279118
	Planktophila dulcis	MsH-2	2-med3	43	127884	0.0217244
	Planktophila dulcis	MsH-2	7-10xmed2	1	33863.2
	Planktophila dulcis	MsH-2	7-10xmed2	4	36600	0.0259069
	Planktophila dulcis	MsH-2	7-10xmed2	8	103474	0.259817
	Planktophila dulcis	MsH-2	7-10xmed2	11	110211	0.021025
	Planktophila dulcis	MsH-2	7-10xmed2	15	146168	0.0705918
	Planktophila dulcis	MsH-2	7-10xmed2	18	397516	0.333492
	Planktophila dulcis	MsH-2	7-10xmed2	22	4.18375e+06	0.588432
	Planktophila dulcis	MsH-2	7-10xmed2	29	2.22761e+07	0.238901
	Planktophila dulcis	MsH-2	7-10xmed2	43	2.19002e+07	-0.00121546
	Planktophila dulcis	MsH-2	8-10xmed3	1	31789.5
	Planktophila dulcis	MsH-2	8-10xmed3	4	26452.6	-0.0612599
	Planktophila dulcis	MsH-2	8-10xmed3	8	103263	0.340481
	Planktophila dulcis	MsH-2	8-10xmed3	11	133568	0.0857777
	Planktophila dulcis	MsH-2	8-10xmed3	15	882084	0.471918
	Planktophila dulcis	MsH-2	8-10xmed3	18	3.86983e+06	0.492893
	Planktophila dulcis	MsH-2	8-10xmed3	22	1.30472e+07	0.303841
	Planktophila dulcis	MsH-2	8-10xmed3	29	1.85182e+07	0.0500256
	Planktophila dulcis	MsH-2	8-10xmed3	43	1.65929e+07	-0.00784152
	Leadbetterella lacustris	RE-19	0-all-media	0	6109.94
	Leadbetterella lacustris	RE-19	1-med2	4	1.22686e+06	-0.655273
	Leadbetterella lacustris	RE-19	1-med2	4	612926	-0.556134
	Leadbetterella lacustris	RE-19	1-med2	4	994684	-0.625303
	Leadbetterella lacustris	RE-19	2-med3	4	869484	-0.606085
	Leadbetterella lacustris	RE-19	2-med3	4	675211	-0.56996
	Leadbetterella lacustris	RE-19	2-med3	4	841274	-0.601373
	Leadbetterella lacustris	RE-19	6-med2+MM	4	1.99771e+06	-0.724921
	Leadbetterella lacustris	RE-19	6-med2+MM	4	1.64094e+06	-0.696816
	Leadbetterella lacustris	RE-19	6-med2+MM	4	1.67133e+06	-0.699438
	Leadbetterella lacustris	RE-19	7-10xmed2	4	4.05436e+06	-0.826034
	Leadbetterella lacustris	RE-19	7-10xmed2	4	4.25786e+06	-0.833031
	Leadbetterella lacustris	RE-19	7-10xmed2	4	4.03971e+06	-0.825517
	Leadbetterella lacustris	RE-19	8-10xmed3	4	918011	-0.613843
	Leadbetterella lacustris	RE-19	8-10xmed3	4	616747	-0.557022
	Leadbetterella lacustris	RE-19	8-10xmed3	4	666811	-0.568171
	Leadbetterella lacustris	RE-19	9-10xmed4	4	2.21762e+07	-1.06878
	Leadbetterella lacustris	RE-19	9-10xmed4	4	2.2026e+07	-1.06781
	Leadbetterella lacustris	RE-19	9-10xmed4	4	2.2692e+07	-1.07207
	Leadbetterella lacustris	RE-19	1-med2	7	2.83458e+06	0.279144
	Leadbetterella lacustris	RE-19	1-med2	7	2.48115e+06	0.466077
	Leadbetterella lacustris	RE-19	1-med2	7	2.83137e+06	0.348697
	Leadbetterella lacustris	RE-19	2-med3	7	2.20055e+06	0.30952
	Leadbetterella lacustris	RE-19	2-med3	7	2.22998e+06	0.398241
	Leadbetterella lacustris	RE-19	2-med3	7	2.25194e+06	0.32821
	Leadbetterella lacustris	RE-19	6-med2+MM	7	1.80763e+06	-0.0333272
	Leadbetterella lacustris	RE-19	6-med2+MM	7	1.92689e+06	0.0535475
	Leadbetterella lacustris	RE-19	6-med2+MM	7	1.75279e+06	0.0158637
	Leadbetterella lacustris	RE-19	7-10xmed2	7	4.81632e+06	0.0574057
	Leadbetterella lacustris	RE-19	7-10xmed2	7	5.08079e+06	0.0588997
	Leadbetterella lacustris	RE-19	7-10xmed2	7	4.65884e+06	0.0475317
	Leadbetterella lacustris	RE-19	8-10xmed3	7	3.22007e+06	0.418317
	Leadbetterella lacustris	RE-19	8-10xmed3	7	1.60862e+06	0.319558
	Leadbetterella lacustris	RE-19	8-10xmed3	7	1.28597e+06	0.21892
	Leadbetterella lacustris	RE-19	9-10xmed4	7	3.68194e+07	0.169002
	Leadbetterella lacustris	RE-19	9-10xmed4	7	3.56851e+07	0.160836
	Leadbetterella lacustris	RE-19	9-10xmed4	7	3.79459e+07	0.171382
	Leadbetterella lacustris	RE-19	1-med2	15	4.18086e+06	0.048578
	Leadbetterella lacustris	RE-19	1-med2	15	2.68183e+06	0.00972236
	Leadbetterella lacustris	RE-19	1-med2	15	3.73061e+06	0.0344765
	Leadbetterella lacustris	RE-19	2-med3	15	481347	-0.189984
	Leadbetterella lacustris	RE-19	2-med3	15	605853	-0.162889
	Leadbetterella lacustris	RE-19	2-med3	15	475137	-0.194493
	Leadbetterella lacustris	RE-19	6-med2+MM	15	4.24581e+06	0.106739
	Leadbetterella lacustris	RE-19	6-med2+MM	15	2.39505e+06	0.0271869
	Leadbetterella lacustris	RE-19	6-med2+MM	15	2.42213e+06	0.0404297
	Leadbetterella lacustris	RE-19	7-10xmed2	15	4.11802e+06	-0.0195796
	Leadbetterella lacustris	RE-19	7-10xmed2	15	3.86642e+06	-0.0341422
	Leadbetterella lacustris	RE-19	7-10xmed2	15	2.94981e+06	-0.0571283
	Leadbetterella lacustris	RE-19	8-10xmed3	15	4.48606e+06	0.0414464
	Leadbetterella lacustris	RE-19	8-10xmed3	15	8.33472e+06	0.205632
	Leadbetterella lacustris	RE-19	8-10xmed3	15	1.26592e+06	-0.00196453
	Leadbetterella lacustris	RE-19	9-10xmed4	15	2.02492e+07	-0.0747389
	Leadbetterella lacustris	RE-19	9-10xmed4	15	2.4264e+07	-0.0482174
	Leadbetterella lacustris	RE-19	9-10xmed4	15	1.99065e+07	-0.0806391
	Leadbetterella lacustris	RE-19	1-med2	19	1.92625e+06	-0.193735
	Leadbetterella lacustris	RE-19	1-med2	19	2.09705e+06	-0.0614918
	Leadbetterella lacustris	RE-19	1-med2	19	4.29844e+06	0.0354202
	Leadbetterella lacustris	RE-19	2-med3	19	1.27888e+06	0.244289
	Leadbetterella lacustris	RE-19	2-med3	19	1.31741e+06	0.194197
	Leadbetterella lacustris	RE-19	2-med3	19	1.65608e+06	0.312152
	Leadbetterella lacustris	RE-19	6-med2+MM	19	836632	-0.406076
	Leadbetterella lacustris	RE-19	6-med2+MM	19	1.00046e+06	-0.218236
	Leadbetterella lacustris	RE-19	6-med2+MM	19	1.39987e+06	-0.137066
	Leadbetterella lacustris	RE-19	7-10xmed2	19	2.69055e+06	-0.106407
[truncated: 612 more rows]

## Sheet: 6-singleM-phylum
Supplementary Data 6: Phylum-level classification of metagenomic reads with SingleM.
Taxonomy	AE-03may19	AE-24oct19	TE-08apr19	TE-11nov19	TrE-03may19	TrE-25oct19	MsE-30apr19	MsE-30jul19	MsE-01oct19	ME-08apr19	ME-09jul19	ME-21oct19	MaE-09apr19	MaE-04nov19	ZE-03apr19	ZE-13nov19	MoE-02may19	MoE-23oct19	MiE-16apr19	MiE-22jul19b	MiE-14oct19	KE-25apr19	KE-07aug19	KE-20nov19	LE-02apr19	LE-05nov19	RE-23apr19	RE-26aug19	RE-18nov19	GE-03apr19b	GE-07nov19	ZLE-24apr19	ZLE-06aug19	ZLE-19nov19		AH-03may19	AH-24oct19	TH-08apr19	TH-11nov19	TrH-03may19	TrH-25oct19	MsH-30apr19	MsH-30jul19	MsH-01oct19	MH-08apr19	MH-09jul19	MH-21oct19	MaH-09apr19	MaH-04nov19
unassigned	1.18	0.9	1.05	0.91	1.55	0.91	1.23	1.43	1.18	1.05	0.71	0.95	1.02	0.78	1.17	1.26	1.03	0.57	1.69	0.71	0.99	1.43	0.67	0.89	1.47	0.95	1.01	0.69	0.6	1.77	1.27	1.01	1.06	0.84		0.76	0.77	1.14	1.08	1.03	0.79	0.7	0.11	0.47	0.69	0.97	0.87	0.91	0.58
Root; d__Archaea; p__Aenigmatarchaeota	0	0	0	0	0	0	0	0	0	0	0	0	0	0	0	0	0	0	0	0	0	0	0	0	0	0	0	0	0	0	0	0	0	0.02		0	0	0	0	0	0	0	0	0	0	0	0	0	0
Root; d__Archaea; p__Altiarchaeota	0	0	0	0	0	0	0	0	0	0	0	0	0	0	0	0	0	0	0	0	0	0	0	0	0	0	0	0	0	0	0	0	0	0.01		0	0	0	0	0	0	0	0	0	0	0	0	0	0
Root; d__Archaea; p__Asgardarchaeota	0	0	0	0	0	0	0	0	0	0	0	0	0	0	0	0	0	0	0	0	0	0	0	0	0	0	0	0	0	0	0	0	0	0.01		0	0	0	0	0	0	0	0	0	0	0	0	0	0
Root; d__Archaea; p__B1Sed10-29	0	0	0	0	0	0	0	0	0	0	0	0	0	0	0	0	0	0	0	0	0	0	0	0	0	0	0	0	0	0	0	0	0	0.03		0	0	0	0	0	0	0	0	0	0	0	0	0	0
Root; d__Archaea; p__Halobacteriota	0	0	0	0	0	0	0	0	0	0	0	0	0	0	0	0.01	0.01	0	0.01	0	0	0	0	0	0.01	0	0	0	0.03	0	0	0	0	0.11		0	0.01	0	0	0	0.01	0	0	0	0	0.01	0	0	0
Root; d__Archaea; p__Iainarchaeota	0	0	0	0	0	0	0	0	0	0	0	0	0	0	0	0	0	0	0	0	0	0	0	0.01	0	0	0	0	0	0	0	0	0	0.07		0	0	0	0	0	0	0	0	0	0	0	0	0.01	0
Root; d__Archaea; p__Methanobacteriota	0	0	0	0	0	0	0	0	0	0	0	0	0	0	0	0	0	0	0	0	0	0	0	0	0	0	0	0	0	0	0	0	0	0		0	0	0	0	0	0	0	0	0	0	0	0	0	0
Root; d__Archaea; p__Micrarchaeota	0	0	0	0	0	0	0	0	0	0.01	0	0	0	0	0	0	0	0	0	0	0	0	0	0.01	0	0	0.01	0	0.01	0	0.01	0	0	0.12		0	0.01	0	0	0	0.01	0	0	0	0.01	0	0	0.01	0.01
Root; d__Archaea; p__Nanoarchaeota	0.03	0.03	0.01	0.03	0.06	0.03	0.03	0.03	0.03	0.03	0.03	0.04	0.03	0.02	0.02	0.03	0.03	0.02	0.03	0	0.03	0	0.04	0.22	0.01	0.02	0.03	0.01	0.12	0.03	0.06	0.02	0.02	1.07		0.07	0.09	0.02	0.11	0.07	0.14	0.04	0.04	0.08	0.03	0.02	0.03	0.49	0.97
Root; d__Archaea; p__Thermoplasmatota	0.02	0.01	0.02	0.01	0.01	0.01	0.02	0	0	0.01	0.01	0	0.01	0.01	0.01	0.01	0.01	0	0.02	0	0	0	0	0.01	0.02	0.01	0.01	0.01	0.01	0	0	0.01	0.01	0.08		0.01	0.01	0	0.01	0.01	0	0.01	0.02	0.02	0.01	0.01	0.01	0.01	0.02
Root; d__Archaea; p__Thermoproteota	0.95	0.01	1.55	2.93	3	0.92	0.01	0.01	0.01	0.03	0.01	0.01	0.58	0.4	0.71	0.08	0.01	0	0.04	0	0.01	0	0.01	0.01	0.11	0	0.03	0.01	0.02	0	0.02	0.01	0.02	0.07		8.21	8.81	4.64	9.59	9.6	12.01	0.02	0.1	0.08	0.04	0.04	0.04	9.87	13.23
Root; d__Bacteria; p__AABM5-125-24	0	0	0	0	0	0	0	0	0	0	0	0	0	0	0	0	0	0	0	0	0	0	0	0	0	0	0	0	0	0	0	0	0	0		0	0	0.1	0.01	0	0	0	0	0	0	0	0	0	0
Root; d__Bacteria; p__Acidobacteriota	0.3	0.03	1.09	0.78	0.64	0.89	0.03	0.03	0.01	0.08	0.01	0.04	0.48	2.79	0.45	1.91	0.52	0.32	1.27	0	0.01	0.02	0.02	0.04	0.12	0.2	0.06	0.09	0.72	0	0.07	0.01	0.02	0.29		1.15	1.95	3.78	3.59	1.63	2.18	0.28	0.96	1.2	0.17	0.29	0.22	2.84	2.54
Root; d__Bacteria; p__Actinomycetota	23.84	26.74	39.67	37.06	16.81	32.47	39.38	13.16	34.69	26.92	27.92	28.97	45.51	38.5	32.29	36.45	28.64	44.72	37.01	60.19	36.39	26.8	35.72	41.11	32.34	44.81	37.24	45.98	31.54	42.6	39.53	53.45	43.61	19.34		22.96	26.97	11.16	14.51	18.13	23.89	44.02	20.23	30.43	33.11	38.23	37.34	18.39	11.88
Root; d__Bacteria; p__Aquificota	0	0	0	0	0	0	0	0	0	0	0	0	0	0	0	0	0	0	0	0	0	0	0	0	0	0	0	0	0	0	0	0	0	0		0	0	0	0	0	0	0	0	0	0	0	0	0	0
Root; d__Bacteria; p__Armatimonadota	0.19	0.27	0.01	0.17	0.1	0.05	0.21	1.12	0.22	0	0.18	0.29	0.05	0.11	0.07	0.05	0.26	0.07	0.06	0	0.32	0	0.28	0.01	0.06	0.09	0.25	0.3	0.08	0.44	0.17	0.04	0.05	0.08		0.06	0.05	0.3	0.1	0.03	0.01	0.19	0.05	0.02	0.01	0.02	0.17	0.04	0.08
Root; d__Bacteria; p__Bacillota	0.03	0.05	0.02	0.02	0.04	0.03	0.05	0.41	0.08	0.2	1.1	1.46	0.01	0.02	0.03	0.03	0.04	0.91	0.06	0	1.32	0.1	0.33	0.16	0.05	0.03	0.03	0.01	0.02	0	0.23	0.01	0.02	0.08		0.02	0.01	0.01	0.02	0.02	0.01	0.02	0.01	0.04	0.19	0.06	0.36	0.01	0.01
Root; d__Bacteria; p__Bacillota_A	0.05	0.04	0.03	0.04	0.1	0.03	0.04	0.01	0.01	0.04	0.03	0.04	0.02	0.05	0.03	0.03	0.04	0.01	0.08	0	0.02	0.02	0.02	0.02	0.06	0.02	0.06	0.01	0.03	0.07	0.03	0.02	0.02	0.19		0.02	0.02	0.02	0.01	0.03	0.01	0.02	0.01	0.07	0.01	0.02	0.02	0.02	0.01
Root; d__Bacteria; p__Bacillota_B	0	0	0	0	0	0	0	0	0	0	0	0	0	0	0	0	0	0	0	0	0	0	0	0	0	0	0	0	0	0	0	0	0	0.01		0	0	0	0	0	0	0	0	0	0	0	0	0	0
Root; d__Bacteria; p__Bacillota_C	0	0	0	0	0	0	0	0	0	0	0	0	0	0	0	0	0	0	0	0	0	0	0	0	0	0	0	0	0	0	0	0	0	0		0	0	0	0	0	0	0	0	0	0	0	0	0	0
Root; d__Bacteria; p__Bacillota_E	0	0	0	0	0	0	0	0	0	0	0	0	0	0	0	0	0	0	0	0	0	0	0	0	0	0	0	0	0	0	0	0	0	0		0	0	0	0	0	0	0	0	0	0	0	0	0	0
Root; d__Bacteria; p__Bacillota_G	0	0	0	0	0	0	0	0	0	0	0	0	0	0	0	0	0	0	0	0	0	0	0	0	0	0	0	0	0	0	0	0	0	0		0	0	0	0	0	0	0	0	0	0	0	0	0	0
Root; d__Bacteria; p__Bacteroidota	7.61	4.99	7.53	8.61	9.78	9.79	5.7	5.33	5.21	4.56	9.36	10.29	13.65	9.48	21.42	11.82	14.35	7.49	7.53	5.02	9.91	13.92	5.36	3.16	24.75	12.32	15.91	16.68	10.82	21.29	14.16	18.48	13.39	11.52		5.51	4.88	7.18	5.35	5.08	5.19	6.68	10.17	13.08	5.03	9.15	9.75	4.92	4.74
Root; d__Bacteria; p__Bdellovibrionota	0.1	0.38	0.09	0.06	0.29	0.15	0.06	1.27	0.02	0.12	0.24	0.63	0.06	0.23	0.53	0.89	0.12	0.16	0.72	0	0.03	0.03	0.21	0.1	0.12	0.62	0.5	0.24	0.55	0.82	0.25	0.16	0.18	0.87		0.34	0.49	0.3	0.92	0.28	0.25	0.06	1.24	0.6	0.12	0.02	0.17	0.18	0.41
Root; d__Bacteria; p__Bipolaricaulota	0	0	0	0	0	0	0	0	0	0	0	0	0	0	0	0	0	0	0	0	0	0	0	0	0	0	0	0	0	0	0	0	0	0.01		0	0	0	0	0	0	0	0	0	0	0	0	0	0
Root; d__Bacteria; p__CAKKQC01	0	0	0	0	0	0	0	0	0	0	0	0	0	0	0	0	0	0	0	0	0	0	0	0	0	0	0	0	0	0	0	0	0	0		0	0	0	0	0	0	0	0	0	0	0	0	0	0
Root; d__Bacteria; p__Campylobacterota	0	0.01	0	0	0.01	0	0	0	0	0	0	0.01	0	0.01	0	0	0	0	0	0	0	0	0	0.02	0	0	0	0	0	0	0.01	0	0	0.14		0	0	0	0	0	0	0	0.01	0.09	0	0	0	0.01	0
Root; d__Bacteria; p__Chlamydiota	0.05	0.05	0.03	0.03	0.06	0.02	0.06	0.01	0.06	0.32	0.01	0.1	0.04	0.05	0.08	0.1	0.03	0.03	0.17	0	0.02	0	0	0.02	0.03	0.08	0.18	0.1	0.11	0	0.02	0.07	0.02	0.06		0.16	0.17	0.07	0.08	0.15	0.16	0.32	0.3	0.15	0.31	0.65	0.26	0.21	0.35
Root; d__Bacteria; p__Chloroflexota	3.66	0.2	5.23	2.53	4.37	2.06	0.61	0.01	0.08	0.89	0.05	0.07	2.43	4.59	1.96	2.67	2.99	2.42	1.18	0.01	0.46	1.51	2.67	1.25	1.92	2.08	0.61	0.63	3.46	0.24	5.06	1.01	1.13	3.03		9.73	14.64	34.23	27.71	11.82	10.54	3.56	5.48	6.09	1.08	2.16	1.08	23.56	21.32
Root; d__Bacteria; p__Cloacimonadota	0	0	0	0	0	0	0	0	0	0	0	0	0	0	0	0	0	0	0	0	0	0	0	0	0	0	0	0	0	0	0	0	0	0		0	0	0	0	0	0	0	0	0	0	0	0	0	0
Root; d__Bacteria; p__Cyanobacteriota	12.91	3.23	7.43	6.06	2.71	6.18	3.21	12.21	2.69	1.51	11.74	9.05	2.02	2.87	0.7	4.47	4.93	2.88	6.71	2.02	2.33	0.58	2.28	0.71	6.32	1.86	1.17	0.99	0.27	0.33	0.72	0.22	1.91	1.02		2.53	0.71	0.75	0.05	0.84	0.24	0.33	0.16	0.21	1.38	18.45	14.47	0.08	0.08
Root; d__Bacteria; p__Deinococcota	0.01	0	0	0	0	0	0	0	0	0.03	0	0	0	0	0	0	0	0	0.01	0	0	0	0.01	0	0	0	0.01	0.01	0.04	0	0	0	0.01	0.04		0	0	0	0	0.06	0	0.03	0	0	0.07	0.02	0	0	0
Root; d__Bacteria; p__Delongbacteria	0	0	0	0	0	0	0	0	0	0	0	0	0	0	0	0	0	0	0	0	0	0	0	0	0	0	0	0	0	0	0	0	0	0.02		0	0	0	0	0	0	0	0	0.01	0	0	0	0	0
Root; d__Bacteria; p__Dependentiae	0.03	0.05	0.05	0.08	0.04	0.04	0.03	0.93	0.02	0.01	0	1	0.02	0.05	0.03	0.36	0.04	0.01	0.01	0	0.18	0	0	0.01	0.06	0.03	0.05	0	0.08	0	0.02	0.02	0.02	0.13		0.23	0.21	0.11	0.2	0.18	0.21	0.09	0.04	0.21	0.02	0.01	0.29	0.32	0.25
Root; d__Bacteria; p__Desulfobacterota	0.01	0.01	0.01	0.01	0.02	0.01	0.01	0.01	0.01	0.01	0.01	0.01	0.01	0.01	0.01	0.02	0.01	0.01	0.01	0	0.01	0	0.01	0.02	0.02	0.01	0.01	0.01	0.02	0	0.01	0	0.01	0.16		0.01	0.01	0.01	0.01	0.01	0.01	0	0	0.01	0.01	0.01	0.01	0.02	0.02
Root; d__Bacteria; p__Desulfobacterota_B	0	0	0	0	0	0	0	0	0	0	0	0	0	0	0	0	0	0	0	0	0	0	0	0	0	0	0	0	0.01	0	0	0	0	0		0.04	0.08	0.73	0.36	0.06	0.14	0	0.01	0.03	0	0	0	0.29	0.35
Root; d__Bacteria; p__Desulfobacterota_E	0	0	0	0	0	0	0	0	0	0	0	0	0	0	0	0	0	0	0	0	0	0	0	0	0	0	0	0	0	0	0	0	0	0.01		0	0	0	0	0	0	0	0	0	0	0	0	0	0
Root; d__Bacteria; p__Desulfobacterota_F	0	0	0	0	0	0	0	0	0	0	0	0	0	0	0	0	0	0	0	0	0	0	0	0.01	0	0	0.01	0	0.01	0	0	0	0	0.05		0	0	0	0	0	0	0	0	0.02	0	0	0	0	0.01
Root; d__Bacteria; p__Desulfobacterota_G	0	0	0	0	0	0	0	0	0	0	0	0	0	0	0	0	0	0	0	0	0	0	0	0	0	0	0	0	0	0	0	0	0	0		0	0	0	0	0	0	0	0	0	0	0	0	0	0
Root; d__Bacteria; p__Dormibacterota	0	0	0	0	0	0	0	0	0	0	0	0	0	0	0	0	0	0	0	0	0	0	0	0	0	0	0	0	0	0	0	0	0	0		0	0	0	0	0	0	0	0	0	0	0	0	0	0
Root; d__Bacteria; p__Edwardsbacteria	0	0	0	0	0	0	0	0	0	0	0	0	0	0	0	0	0	0	0	0	0	0	0	0	0	0	0	0	0	0	0	0	0	0.03		0	0	0	0	0	0	0	0	0	0	0	0	0	0
Root; d__Bacteria; p__Eisenbacteria	0	0	0	0	0	0	0	0	0	0	0	0	0	0	0	0	0	0	0	0	0	0	0	0	0	0	0	0	0	0	0	0	0	0		0	0	0	0	0	0	0	0	0	0	0	0	0	0
Root; d__Bacteria; p__Elusimicrobiota	0	0	0	0	0.02	0	0	0	0	0	0	0	0	0	0	0	0.01	0	0	0	0	0	0	0.01	0	0	0.01	0	0	0	0	0	0	0.21		0	0.01	0	0	0	0.01	0	0.02	0.01	0.01	0.01	0.01	0.01	0.02
Root; d__Bacteria; p__Eremiobacterota	0	0	0	0	0	0	0	0	0	0	0	0	0	0	0	0	0	0	0	0	0	0	0	0	0	0	0	0	0	0	0	0	0	0		0	0	0	0	0	0	0	0	0	0	0	0	0	0
Root; d__Bacteria; p__FEN-1099	0	0	0	0	0	0	0	0	0	0	0	0	0	0	0	0	0	0	0	0	0	0	0	0	0	0	0	0	0	0	0	0	0	0		0	0	0	0	0	0	0	0	0	0	0	0	0	0
Root; d__Bacteria; p__Fibrobacterota	0	0	0	0	0	0	0	0	0	0	0	0	0	0	0	0	0	0	0	0	0	0	0	0	0	0	0	0	0.01	0	0	0	0	0.02		0	0	0	0	0	0	0	0	0.04	0	0	0	0	0
Root; d__Bacteria; p__Fusobacteriota	0	0	0	0	0	0	0	0	0	0	0	0.01	0	0	0	0	0	0	0	0	0	0	0	0	0	0	0	0	0	0	0	0	0	0		0	0	0	0	0	0	0	0	0	0	0	0	0	0
Root; d__Bacteria; p__Gemmatimonadota	0.07	0	0.22	0.13	0.35	0.47	0.01	0	0	0.53	0	0.01	0.07	0.34	0.21	0.45	0.25	0.09	0.07	0	0	0.02	0.54	0.09	0.04	0.22	0.13	0.19	0.34	0.21	0.02	0.21	0.11	0.06		0.85	0.91	1.08	0.78	0.89	0.6	0.15	0.69	1.09	0.5	0.59	0.14	0.69	0.78
Root; d__Bacteria; p__Hydrogenedentota	0	0	0	0	0	0	0	0	0	0	0	0	0	0	0	0	0	0	0	0	0	0	0	0	0	0	0	0	0	0	0	0	0	0.01		0	0	0.02	0.01	0	0.01	0	0	0	0	0	0	0	0
Root; d__Bacteria; p__JAAXHH01	0	0	0	0	0	0	0	0	0	0	0	0	0	0	0	0	0	0	0	0	0	0	0	0	0	0	0	0	0	0	0	0	0	0		0	0.02	0.01	0.01	0.01	0.01	0	0	0	0	0	0	0.01	0.04
Root; d__Bacteria; p__JAFGBW01	0	0	0	0	0	0	0	0	0	0	0	0	0	0	0	0	0	0	0	0	0	0	0	0	0	0	0	0	0	0	0	0	0	0		0	0	0	0	0	0	0	0	0	0	0	0	0	0
Root; d__Bacteria; p__Krumholzibacteriota	0	0	0	0	0	0	0	0	0	0	0	0	0	0	0	0	0	0	0	0	0	0	0	0	0	0	0	0	0	0	0	0	0	0		0	0	0	0	0	0	0	0	0	0	0	0	0	0
Root; d__Bacteria; p__Latescibacterota	0	0	0	0	0	0	0	0	0	0	0	0	0	0	0	0	0	0	0	0	0	0	0	0	0	0	0	0	0	0	0	0	0	0		0.01	0.07	0.1	0.07	0.01	0.01	0	0	0	0	0	0	0.14	0.15
Root; d__Bacteria; p__Margulisbacteria	0.03	0.04	0.01	0.07	0.05	0.02	0.01	0	0	0.35	0	0.12	0.01	0.03	0.05	0.04	0.02	0.01	0.47	0	0	0	0	0	0.02	0	0	0	0.19	0	0.01	0	0	0.04		0.11	0.07	0.01	0	0.11	0.03	0.23	1.1	0.52	0.31	0.34	0.22	0.04	0.07
Root; d__Bacteria; p__Marinisomatota	0	0	0	0	0	0	0	0	0	0	0	0	0	0	0	0	0	0	0	0	0	0	0	0	0	0	0	0	0	0	0	0	0	0		0	0	0	0	0	0	0	0	0	0	0	0	0	0
Root; d__Bacteria; p__Methylomirabilota	0	0	0	0	0	0	0	0	0	0	0	0	0	0	0	0	0	0	0	0	0	0	0	0	0	0	0	0	0	0	0	0	0	0		0	0	0	0	0	0	0	0	0	0	0	0	0	0
Root; d__Bacteria; p__Myxococcota	0.24	0.08	0.03	0.22	0.47	0.15	0.05	0.26	0.05	0.02	0.12	0.45	0.1	0.61	0.17	0.43	0.21	0.17	0.76	0	0.09	0.01	0.68	0.17	0.11	0.28	1.32	0.19	0.37	0.06	0.4	0.03	0.09	0.27		0.42	0.46	0.51	0.37	0.6	0.41	0.3	0.58	1.67	0.02	0.21	0.88	0.66	0.94
Root; d__Bacteria; p__Myxococcota_A	0	0	0	0	0	0	0	0	0	0	0	0	0	0	0	0	0	0	0	0	0	0	0	0	0	0	0	0	0	0	0	0	0	0		0	0	0	0	0	0	0	0	0	0	0	0	0	0
Root; d__Bacteria; p__Nitrospinota	0	0	0	0	0	0	0	0	0	0	0	0	0	0	0	0	0	0	0	0	0	0	0	0	0	0	0	0	0	0	0	0	0	0		0	0	0	0	0	0	0	0	0	0	0	0	0	0
Root; d__Bacteria; p__Nitrospirota	0.02	0	0.13	0.37	0.33	0.09	0	0	0	0.02	0	0	0.09	0.05	0.05	0.14	0	0	0	0	0	0	0	0	0.02	0	0	0	0	0	0	0	0	0.03		1.55	2.02	2.17	2.55	2.28	2.5	0	0.01	0.01	0.02	0	0	3.18	5.05
Root; d__Bacteria; p__OLB16	0	0	0	0	0	0	0	0	0	0	0	0	0	0	0	0	0	0	0	0	0	0	0	0	0	0	0	0	0	0	0	0	0	0		0	0	0	0	0	0	0	0	0	0	0	0	0	0
Root; d__Bacteria; p__Omnitrophota	0.03	0.02	0.01	0.03	0.11	0.03	0.04	0.04	0.01	0.11	0.03	0.04	0.01	0.03	0.02	0.02	0.04	0.01	0.04	0	0.03	0.01	0.01	0.16	0.01	0.01	0.05	0	0.09	0	0.07	0.01	0.01	1.72		0.1	0.11	0.08	0.1	0.11	0.1	0.05	0.16	0.11	0.14	0.09	0.07	0.17	0.18
Root; d__Bacteria; p__Patescibacteria	0.57	0.13	0.49	0.27	0.56	0.26	0.4	0.15	0.12	0.61	0.33	0.46	0.33	0.26	0.23	0.19	0.15	0.12	0.43	0.22	0.53	0.11	0.09	0.78	0.18	0.08	0.33	0.93	0.86	0.17	0.44	0.22	0.14	1.76		0.8	1.38	0.94	3.05	1.2	2.93	0.51	0.83	2.61	0.65	0.54	1.15	5.23	5.4
Root; d__Bacteria; p__Planctomycetota	7.16	1.82	1.62	3.09	3.53	2.93	2.03	2.52	0.66	7.48	0.33	0.68	3.83	2.67	5.91	5.23	11.36	3.06	5.16	0.25	0.99	0.03	0.97	0.74	4.72	4.1	1.28	4.07	3.61	5.58	0.99	0.89	0.81	3.53		9.16	8.03	6.87	8.96	6.23	6.12	7.55	23.18	8.69	8.43	4.14	3.65	7.56	7.24
Root; d__Bacteria; p__Pseudomonadota	31.35	43.56	30.89	25.35	37.49	34.53	43.18	34.99	46.98	39.12	34.88	39.74	16.1	25.31	23.46	26.68	30.73	27.59	28.72	29.87	42.19	51.27	45.36	45.27	22.48	20.51	28.92	24.26	35.89	23.95	25.65	21.56	32.4	35.23		17.86	17.49	14.51	15.17	28.05	26.98	22.96	15.86	23.07	30.69	19.23	24.88	16.62	16.86
Root; d__Bacteria; p__Ratteibacteria	0	0	0	0	0	0	0	0	0	0	0	0	0	0	0	0	0	0	0	0	0	0	0	0	0	0	0	0	0	0	0	0	0	0		0	0	0	0	0	0	0	0	0	0	0	0	0	0
Root; d__Bacteria; p__Riflebacteria	0	0	0	0	0	0	0	0	0	0	0	0	0	0	0	0	0	0	0	0	0	0	0	0	0	0	0	0	0	0	0	0	0	0		0	0	0	0	0	0	0	0	0	0	0	0	0	0
Root; d__Bacteria; p__RUG730	0	0	0	0	0	0	0	0	0	0	0	0	0	0	0	0	0	0	0	0	0	0	0	0	0	0	0	0	0	0	0	0	0	0		0	0	0	0	0	0	0	0	0	0	0	0	0	0
Root; d__Bacteria; p__Spirochaetota	0	0.01	0	0	0	0.01	0.09	0.01	0.01	0	0.03	0.02	0	0	0	0.01	0.02	0	0.04	0	0	0.05	0.03	0.03	0.01	0.01	0.01	0.37	0.02	0	0.04	0	0.07	0.03		0	0	0	0	0	0	0.21	0.1	0.04	0	0.01	0.03	0	0
Root; d__Bacteria; p__Sumerlaeota	0	0	0	0	0	0	0	0	0	0	0	0	0	0	0	0	0	0	0	0	0	0	0	0	0	0	0	0	0	0	0	0	0	0		0	0	0	0	0	0	0	0	0	0	0	0	0	0
Root; d__Bacteria; p__Tectomicrobia	0	0	0	0	0	0	0	0	0	0	0	0	0	0	0	0	0	0	0	0	0	0	0	0	0	0	0	0	0	0	0	0	0	0		0	0	0	0	0	0	0	0	0	0	0	0	0.08	0.07
Root; d__Bacteria; p__UBA10199	0	0	0	0	0	0	0	0	0	0	0	0	0	0.02	0	0	0	0	0	0	0	0	0	0	0	0	0	0	0	0	0	0	0	0		0	0	0	0	0.01	0.01	0	0	0	0	0	0	0	0
Root; d__Bacteria; p__UBA3054	0	0	0	0	0	0	0	0	0	0	0	0	0	0	0	0	0	0	0	0	0	0	0	0	0	0	0	0	0	0	0	0	0	0		0	0	0	0	0	0	0	0	0	0	0	0	0	0
Root; d__Bacteria; p__UBP6	0	0	0	0	0	0	0	0	0	0	0	0	0	0	0	0	0	0	0	0	0	0	0	0	0	0	0	0	0	0	0	0	0	0.01		0	0	0	0	0	0	0	0	0	0	0	0	0	0
Root; d__Bacteria; p__Verrucomicrobiota	9.53	17.36	2.76	11.1	17.51	7.94	3.48	26.06	7.83	15.91	12.85	5.49	13.51	10.69	10.36	6.63	4.19	9.31	7.72	1.7	4.09	4.09	4.7	4.93	4.92	11.65	10.77	4.21	10.03	2.43	10.73	2.56	4.89	17.57		17.34	9.54	9.12	5.2	11.46	4.48	11.69	18.54	9.23	16.95	4.69	3.89	3.43	6.32
Root; d__Bacteria; p__WOR-3	0	0	0	0	0	0	0	0	0	0	0	0	0	0	0	0	0	0	0.01	0	0	0	0	0	0	0	0	0	0	0	0	0	0	0		0	0	0	0	0	0	0	0	0	0	0	0	0	0
Root; d__Bacteria; p__Zixibacteria	0	0	0	0	0	0	0	0	0	0	0	0	0	0	0	0	0	0	0	0	0	0	0	0	0	0	0	0	0	0	0	0	0	0		0	0	0	0	0	0	0	0	0	0	0	0	0	0
[truncated: 21 more columns]

## Sheet: 7-singleM-genus
Supplementary Data 7: Genus-level classification of metagenomic reads with SingleM.
sorting	taxonomy	SILVA tax-cultures	NOTE	# strains	abundant/rare	maximum	average	# samples	prevalence (%)	cultivated before	validly described under the ICNP (only abundant genera were evaluated)	AE-03may19	AE-24oct19	TE-08apr19	TE-11nov19	TrE-03may19	TrE-25oct19	MsE-30apr19	MsE-30jul19	MsE-01oct19	ME-08apr19	ME-09jul19	ME-21oct19	MaE-09apr19	MaE-04nov19	ZE-03apr19	ZE-13nov19	MoE-02may19	MoE-23oct19	MiE-16apr19	MiE-22jul19b	MiE-14oct19	KE-25apr19	KE-07aug19	KE-20nov19	LE-02apr19	LE-05nov19	RE-23apr19	RE-26aug19	RE-18nov19	GE-03apr19	GE-07nov19	ZLE-24apr19	ZLE-06aug19	ZLE-19nov19		AH-03may19	AH-24oct19	TH-08apr19
1	d__Bacteria; p__Pseudomonadota; c__Alphaproteobacteria; o__Pelagibacterales; f__Pelagibacteraceae; g__Fonsibacter	taxonomy=Bacteria/Proteobacteria/Alphaproteobacteria/SAR11clade/CladeIII		12	abundant	37.16	10.0046	67	100	yes	not validly published, Candidatus	11.97	24.58	6.37	8.54	9.53	13.37	20.22	22.3	37.16	24.68	19.47	25.68	2.05	11.46	3.78	9.88	5.09	9.25	5.83	14.14	27.47	36.66	36.13	33.94	1.67	7.69	0.55	2.77	12.07	2.98	12.34	0.96	20.37	17.47		4.31	3.4	1.74
2	d__Bacteria; p__Actinomycetota; c__Actinomycetia; o__Nanopelagicales; f__Nanopelagicaceae; g__Planktophila	taxonomy=Bacteria/Actinobacteriota/Actinobacteria/Frankiales_2_Sporichthyaceae_1/Nanopelagicales/Candidatus Planktophila		13	abundant	30.2	9.61701	67	100	yes	not validly published, Candidatus	5.38	5.76	15.43	10.02	7.08	7.67	10.64	2.06	4.25	5.83	2.97	5.5	22	5.88	16.73	8.59	14.6	9.91	14.68	14.36	6.77	9.93	9.42	11.51	18.99	8.82	25.64	9.55	8.58	23.65	14.22	30.2	19.52	5.64		4.82	5.07	1.6
3	d__Bacteria; p__Actinomycetota; c__Actinomycetia; o__Nanopelagicales; f__Nanopelagicaceae; g__Nanopelagicus				abundant	25.69	8.4603	67	100	yes, but only transiently	not validly published, Candidatus	7.8	13.92	6.47	10.43	3.05	11	21.95	5.62	14.78	12.07	10.14	18.11	4.67	10.47	4.31	8.91	5.12	17.6	8.49	25.69	18.71	10.99	14.61	19.13	4.31	11.68	1.55	23.53	8.89	6.87	13.16	10.24	17.49	8.12		4.11	4.82	1.05
4	d__Bacteria; p__Chloroflexota; c__Anaerolineae; o__Anaerolineales; f__UBA11657; g__BD1				abundant	31.48	3.67985	35	52.2388	no		2.94	0	4.72	1.81	3.77	0.85	0.29	0	0	0.19	0	0	1.6	0.37	1.25	0.28	1.43	0.15	0	0	0	0	0	0	1.36	0.02	0	0	0	0	0	0	0	0		8.71	12.9	31.48
5	d__Bacteria; p__Verrucomicrobiota; c__Verrucomicrobiae; o__Opitutales; f__UBA953; g__UBA953				abundant	12.37	2.82194	62	92.5373	no		1.67	0.07	1.07	4.71	12.37	4.88	0.01	0	0.01	9.61	0	0	10.01	1.93	6	1.21	1.46	4.11	0.2	0	0.12	3.68	1.74	2.65	3.11	2.41	5.48	0.08	3.63	0.93	7.98	0.55	0.94	9.54		2.95	0.22	0.42
6	d__Bacteria; p__Cyanobacteriota; c__Cyanobacteriia; o__PCC-6307; f__Cyanobiaceae	taxonomy=Bacteria/Cyanobacteria/Cyanobacteriia/Synechococcales/Cyanobiaceae/Cyanobium PCC-6307	SUMMED up at family level (9 genera)	33	abundant	18.26	2.49134	61	91.0448	yes	validly published as Synechococcaceae	12.63	3	7.23	5.83	2.28	5.83	2.88	12.03	2.48	1.05	11.53	8.68	1.92	2.61	0.32	3.13	4.72	2.8	6.1	2.01	2.05	0.01	1.88	0.39	5.88	1.53	0.9	0.58	0	0	0.06	0.16	0.79	0.01		2.43	0.65	0.72
7	d__Bacteria; p__Pseudomonadota; c__Gammaproteobacteria; o__Burkholderiales; f__Burkholderiaceae_B; g__Limnohabitans_A	taxonomy=Bacteria/Proteobacteria/Gammaproteobacteria/Burkholderiales/Comamonadaceae/Limnohabitans		109	abundant	7.65	2.43791	67	100	yes		5.2	3.75	5.38	4.39	6.47	4.95	6.14	1.69	2.98	0.46	2.36	2.63	5.63	2.96	6.47	3.91	6.64	4.47	6.4	0.68	1.56	0.61	0.47	0.55	6.47	3.35	3.21	1.36	2.76	7.65	2.73	4.49	1.12	1.25		1.35	0.82	0.33
8	d__Bacteria; p__Pseudomonadota; c__Gammaproteobacteria; o__Burkholderiales; f__Methylophilaceae; g__Methylopumilus	taxonomy=Bacteria/Proteobacteria/Gammaproteobacteria/Burkholderiales/Methylophilaceae/Candidatus Methylopumilus		49	abundant	8.93	2.22821	65	97.0149	yes	not validly published, Candidatus	2.94	0.49	3.31	1.92	6.95	4.05	0.69	0	0.12	3.3	0.01	0.05	1.71	3.27	3.1	2.75	3.99	3.87	1.16	0	0.36	8.93	2.96	4.03	2.05	2.92	1.67	2.35	3.87	1.54	3.27	0.85	2.33	2.7		3.04	2.27	0.87
9	d__Bacteria; p__Actinomycetota; c__Acidimicrobiia; o__Acidimicrobiales; f__Ilumatobacteraceae; g__BACL27				abundant	6.15	2.05149	62	92.5373	no		2.73	1.57	4.8	5.23	1.53	4.94	1.32	0.23	0.54	1.31	0.06	1.59	3.33	5.71	1.81	4.86	1.47	3.1	0.76	0	0.52	0.03	0.08	1.65	1.41	4.78	0.08	0	0.8	0.03	1.25	0	0	0.08		4.46	6.15	3.63
10	d__Bacteria; p__Actinomycetota; c__Acidimicrobiia; o__Acidimicrobiales; f__Ilumatobacteraceae; g__UBA3006				abundant	7.61	1.86224	65	97.0149	no		0.65	0.06	1.94	1.44	1.11	1.78	0.4	0	0.02	1.99	0.01	0.16	4.58	2.62	2.38	3.43	1.43	1.18	1.51	0	0.24	0.65	1.89	1.58	2.31	2.25	2.44	3.02	3.15	3.47	3.22	5.87	0.8	1.06		1.11	0.94	0.5
11	d__Bacteria; p__Bacteroidota; c__Bacteroidia; o__Chitinophagales; f__Chitinophagaceae; g__Sediminibacterium	taxonomy=Bacteria/Bacteroidota/Bacteroidia/Chitinophagales/Chitinophagaceae/Asinibacterium		1	abundant	5.7	1.77746	67	100	yes	validly published under the ICNP	0.86	0.6	2.74	1.56	3.19	3.11	0.84	0.11	0.73	0.94	0.08	0.33	5.36	2.82	5.29	2.43	1.88	2.05	0.16	1.82	0.62	3.95	0.95	0.5	3.19	4.08	2.76	1.6	3.24	3.47	3.71	5.7	4.31	1.2		0.93	0.83	0.44
12	d__Archaea; p__Thermoproteota; c__Nitrososphaeria; o__Nitrososphaerales; f__Nitrosopumilaceae; g__Nitrosopumilus				abundant	18.58	1.67448	23	34.3284	yes	validly published under the ICNP	0.92	0	1.52	2.88	2.93	0.88	0	0	0	0	0	0	0.53	0.38	0.67	0.05	0	0	0	0	0	0	0	0	0.1	0	0	0	0	0	0	0	0	0		8.13	8.73	4.6
13	d__Bacteria; p__Actinomycetota; c__Actinomycetia; o__Nanopelagicales; f__Nanopelagicaceae; g__MAG-120802				abundant	14.77	1.61194	56	83.5821	no		1.25	2.55	4.11	4.63	0.49	3.65	2.21	2.28	11.74	0.02	0.02	0.04	1.37	5.48	0.97	4.35	1.14	7.91	0.86	14.77	4.28	0.32	1.32	1.6	1.63	12.05	0	0.11	0	0	0.85	0	0.01	0		0.89	0.83	0.29
14	d__Bacteria; p__Verrucomicrobiota; c__Verrucomicrobiae; o__Methylacidiphilales; f__UBA3015; g__UBA3015	taxonomy=Bacteria/Verrucomicrobiota/Verrucomicrobiae/Methylacidiphilales_Methylacidiphilaceae/uncultured		1	abundant	22.71	1.39209	59	88.0597	no		4.16	13.66	0.6	1.91	0.12	0.87	0.98	22.71	4.6	1.82	11.19	3.28	0.16	1.09	0.69	1.8	0.45	2.37	0.51	1.45	0.74	0	0.82	0	0.08	3.53	0.06	0	0.02	0	0.36	0	0	0.02		1.36	0.67	0.1
15	d__Bacteria; p__Planctomycetota; c__Phycisphaerae; o__Phycisphaerales; f__SM1A02; g__F1-60-MAGs104				abundant	7.57	1.39179	51	76.1194	no		2.38	0	0.41	1.02	1.13	1.43	1.34	0	0	2.91	0	0.09	0.58	0.22	1.93	0.41	4.56	0.29	0.23	0	0	0.01	0	0	0.93	0.25	0.02	0	0.13	0.05	0	0	0	0		2.7	2.51	2.11
16	d__Bacteria; p__Pseudomonadota; c__Gammaproteobacteria; o__Burkholderiales; f__Burkholderiaceae_B; g__Limnohabitans	taxonomy=Bacteria/Proteobacteria/Gammaproteobacteria/Burkholderiales/Comamonadaceae/uncultured		30	abundant	4.56	1.28881	67	100	yes	validly published under the ICNP	2.79	2.14	4.56	2.19	2.82	3.09	3.78	0.64	1.17	1.13	0.17	0.36	1.28	1.12	1.57	0.97	3.05	2.45	3.58	0.22	0.22	1.74	0.5	0.76	2.43	0.76	4.32	0.11	2.32	0.8	0.67	3.15	0.47	0.86		1.05	0.64	0.35
17	d__Bacteria; p__Bacteroidota; c__Bacteroidia; o__Flavobacteriales; f__Crocinitomicaceae; g__UBA952				abundant	4.94	1.05866	67	100	no		1.86	0.6	0.87	1.49	0.89	1.91	0.08	0.04	0.17	0.44	1.12	0.24	2.54	2.47	4.43	2.44	4	1.33	0.69	0.02	0.06	0.9	0.62	0.54	3.33	2.77	3.69	2.31	0.51	4.94	2.15	2.79	0.41	0.22		0.63	0.58	0.15
18	d__Bacteria; p__Chloroflexota; c__Limnocylindria; o__Limnocylindrales; f__Limnocylindraceae; g__Limnocylindrus				abundant	5.03	1.03597	65	97.0149	no	not validly published, Candidatus	0.43	0.16	0.3	0.53	0.35	1.13	0.27	0	0.03	0.35	0.04	0.03	0.66	3.13	0.56	1.99	1.33	2.15	0.81	0	0.44	1.49	2.62	1.21	0.41	1.74	0.4	0.44	3.1	0.18	5.03	0.91	1.12	2.67		0.34	0.37	0.01
19	d__Bacteria; p__Pseudomonadota; c__Gammaproteobacteria; o__Burkholderiales; f__Burkholderiaceae; g__Polynucleobacter	taxonomy=Bacteria/Proteobacteria/Gammaproteobacteria/Burkholderiales/Burkholderiaceae_2/Polynucleobacter		112	abundant	6.12	1.02642	67	100	yes	validly published under the ICNP	2.01	2.73	2.4	1.42	1.87	1.72	2.1	0.81	0.73	1.85	0.52	0.53	0.89	0.77	0.66	0.44	2.89	0.82	1.54	0.14	0.11	0.56	1.35	0.81	0.9	0.57	2.92	6.12	0.83	1.41	0.4	3.05	3.22	0.28		0.56	0.33	0.11
20	d__Bacteria; p__Planctomycetota; c__Phycisphaerae; o__Phycisphaerales; f__SM1A02; g__SYAC01				abundant	4.71	0.914328	61	91.0448	no		0.8	0.33	0.26	0.78	1.78	0.67	0.07	0.21	0.03	0.01	0	0.05	0.92	0.28	1.03	1.19	1.28	0.42	0.1	0	0	0	0.02	0.12	1.02	0.76	0.32	0.02	0.29	0.42	0	0.04	0.06	0.63		1.27	1.21	2.59
21	d__Bacteria; p__Bacteroidota; c__Bacteroidia; o__Flavobacteriales; f__Flavobacteriaceae; g__Flavobacterium	taxonomy=Bacteria/Bacteroidota/Bacteroidia/Flavobacteriales/Flavobacteriaceae_1/Flavobacterium_1		27	abundant	9.12	0.89403	67	100	yes	validly published under the ICNP	0.73	0.42	0.39	0.58	1.37	0.71	0.91	0.17	0.37	0.23	1.34	0.3	2.06	0.12	2.22	1.24	2.09	0.17	1.16	0.11	0.1	1.25	0.08	0.05	9.12	1.26	3.85	1.34	0.79	1.69	1.02	3.68	0.62	3.47		0.08	0.03	0.01
22	d__Bacteria; p__Bacteroidota; c__Bacteroidia; o__NS11-12g	taxonomy=Bacteria/Bacteroidota/Bacteroidia/Sphingobacteriales/NS11-12 marine group	SUMMED up at order level (21 genera)	1	abundant	3.9	0.769552	65	97.0149	no		0.49	0.58	0.18	0.84	0.26	0.54	0	0.68	0.27	0.27	0.69	1.29	0.4	0.27	0.86	0.5	0.31	0.78	1.79	0	0.34	1.39	0.97	0.19	0.63	0.22	0.54	1.15	1.12	1.08	0.72	1.1	2.43	2.21		0.52	0.42	0.51
23	d__Bacteria; p__Pseudomonadota; c__Gammaproteobacteria; o__Burkholderiales; f__Burkholderiaceae_B; g__Rhodoferax	taxonomy=Bacteria/Proteobacteria/Gammaproteobacteria/Burkholderiales/Comamonadaceae/Rhodoferax		1	abundant	6.4	0.747313	64	95.5224	yes	validly published under the ICNP	0.64	0.06	1.62	0.62	0.82	0.64	0.35	0.08	0.03	0.41	0.01	0.16	0.7	0.62	1.28	0.8	0.89	0.63	0.69	0	0.01	0	0	0.19	1.97	0.26	0.45	0.05	0.4	0.41	0.21	0.38	0.04	0.11		0.97	1.18	0.85
24	d__Bacteria; p__Actinomycetota; c__Acidimicrobiia; o__Acidimicrobiales; f__Ilumatobacteraceae; g__UBA2093				abundant	3	0.693881	63	94.0299	no		0.45	0.15	1.16	1.14	0.66	0.53	0.31	0	0.11	0.05	0	0	2.94	1.14	1.13	0.62	0.8	0.35	0.34	0	0.05	0.17	1.29	0.24	0.67	0.76	1.73	1.04	0.67	1.59	0.91	3	0.58	0.46		0.7	0.71	0.6
25	d__Bacteria; p__Pseudomonadota; c__Gammaproteobacteria; o__Burkholderiales; f__Methylophilaceae; g__Methylotenera	taxonomy=Bacteria/Proteobacteria/Gammaproteobacteria/Burkholderiales/Methylophilaceae/Methylotenera_1	SUMMED up: g__Methylotenera & g__Methylotenera_A (2 genera)	55	abundant	8.22	0.596418	46	68.6567	yes	validly published under the ICNP	0	0	0	0	0.21	0.01	0.01	0.02	0.01	0.02	0.47	0.02	0.02	0.01	0.07	0	0.02	0	0	0	0.01	0.03	0	0.18	0	0	4.19	0	0.17	0.16	0.67	1.24	0	1.1		0	0	0.18
26	d__Bacteria; p__Pseudomonadota; c__Gammaproteobacteria; o__Burkholderiales; f__Burkholderiaceae_B; g__Rhodoferax_C	taxonomy=Bacteria/Proteobacteria/Gammaproteobacteria/Burkholderiales/Comamonadaceae		5	abundant	2.44	0.579104	65	97.0149	yes		1.35	0.94	2.09	0.69	2.01	0.42	2.25	0.29	0.08	0.25	0.4	0.65	1.08	0.08	0.9	0.29	0.99	0.35	0.25	0	0.02	0.13	0	0.09	1.89	0.13	1.76	0.11	0.49	0.45	0.1	1.4	0.03	0.41		0.23	0.14	0.11
27	d__Bacteria; p__Bacteroidota; c__Bacteroidia; o__AKYH767	taxonomy=Bacteria/Bacteroidota/Bacteroidia/Sphingobacteriales/env. OPS17	SUMMED up at order level (8 genera)	1	abundant	3.24	0.574925	63	94.0299	no		0.31	0.01	0.25	0.31	0.24	0.67	0.05	0	0	0.6	0.01	0.74	0.47	0.48	0.65	0.56	0.47	0.31	0.05	0	0.01	0	0.12	0.22	1.07	0.26	0.84	0.3	0.45	1.02	0.24	1.37	0.34	0.72		1.01	0.43	0.19
28	d__Bacteria; p__Nitrospirota; c__Nitrospiria; o__Nitrospirales; f__Nitrospiraceae; g__Palsa-1315				abundant	4.99	0.55806	25	37.3134	no		0.01	0	0.13	0.36	0.32	0.09	0	0	0	0.01	0	0	0.09	0.04	0.04	0.13	0	0	0	0	0	0	0	0	0.02	0	0	0	0	0	0	0	0	0		1.54	2.01	2.17
29	d__Bacteria; p__Verrucomicrobiota; c__Verrucomicrobiae; o__Pedosphaerales; f__UBA9464; g__SXXZ01				abundant	2	0.556567	66	98.5075	no		0.43	0.25	0.12	1.05	1.03	0.98	0.31	0.65	0.95	0.75	0.06	0.5	1.03	0.77	0.53	0.93	0.29	0.91	0.41	0.01	0.42	0	0.95	0.73	0.37	0.89	2	0.35	0.52	0.06	0.81	0.17	0.31	0.92		0.57	0.47	0.16
30	d__Bacteria; p__Planctomycetota; c__Planctomycetia; o__Gemmatales; f__Gemmataceae; g__UBA969				abundant	5.94	0.543284	60	89.5522	no		0.44	0.03	0.14	0.25	0.13	0.23	0.16	0	0	0.24	0.01	0.03	0.61	0.62	0.87	1.15	0.87	0.19	0.25	0	0.01	0	0	0.12	0.59	0.14	0.07	0	0.79	0.7	0.04	0.35	0	1.63		0.8	0.7	0.25
31	d__Bacteria; p__Actinomycetota; c__Actinomycetia; o__Nanopelagicales; f__UBA5976; g__ATZT02				abundant	2.85	0.536269	61	91.0448	no		0.27	0.97	0	0	0.02	0.06	0.66	0.3	0.89	0.72	2.85	1.2	0.02	0.66	0.18	0.37	0.15	0.47	0.6	0.14	2.1	1.63	1.82	2.35	0.03	0.65	0.05	2.12	0.81	0.22	1.03	0.17	1.75	0.81		0.12	0.07	0
32	d__Bacteria; p__Actinomycetota; c__Actinomycetia; o__Nanopelagicales; f__Nanopelagicaceae; g__UBA7398				abundant	2.05	0.507164	49	73.1343	no		0.36	0	0.92	0.5	0.58	0.53	0.03	0	0	0	0	0	1.32	0.4	1.2	0.49	0.45	0.14	0	0	0	0.01	0	0.13	0.31	0.05	0.18	0	1.06	0	0.1	0.02	0	0.04		0.88	1.55	0.32
33	d__Bacteria; p__Bacteroidota; c__Bacteroidia; o__Flavobacteriales; f__Schleiferiaceae; g__TMED14				abundant	2.77	0.482687	55	82.0896	no		0.5	0.31	0.81	0.95	0.83	0.6	0.05	0.2	0.47	0.36	0.85	0.94	0.31	0.07	1.01	0.52	0.31	0.56	1.02	1.58	1.58	2.45	0.26	0.26	1.03	0.33	0	0.37	0	1.63	0.37	0	0.4	0		0.29	0.36	0.19
34	d__Bacteria; p__Pseudomonadota; c__Gammaproteobacteria; o__Burkholderiales; f__Gallionellaceae; g__Nitrotoga				abundant	9.31	0.46	30	44.7761	yes	not validly published, Candidatus	0	0	0	0	0	0	0	0	0	0	0	0	0	0	0	0.15	0	0	0	0	0	0	0	0.19	0	0.02	0.01	0	2.29	0	0	0	0	0.03		0.03	0.02	0
35	d__Bacteria; p__Pseudomonadota; c__Gammaproteobacteria; o__Burkholderiales; f__Burkholderiaceae_A; g__UBA2463 & g__UBA954	taxonomy=Bacteria/Proteobacteria/Gammaproteobacteria/Burkholderiales/MWH-UniP1 aquatic group	SUMMED up: g__UBA2463 & g__UBA954 (2 genera)	21	abundant	13.44	0.45403	31	46.2687	no		0.02	0.81	0	0	0	0.1	0.02	0.68	1.59	0	0.01	2.87	0	0.07	0	0.05	0.03	0.24	0.2	13.44	5.2	0	0.53	0.09	0	0.16	0	0.04	0	0	0.05	0	0.48	0		0.01	0.02	0
36	d__Bacteria; p__Actinomycetota; c__Acidimicrobiia; o__Acidimicrobiales; f__Ilumatobacteraceae; g__Casp-actino8				abundant	2.13	0.45	62	92.5373	no		0.35	0.01	0.62	0.6	0.57	0.6	0.01	0	0	1.16	0	0	1.64	1.16	0.76	1.02	0.25	0.32	0.1	0	0.01	0.1	0.46	0.1	0.46	0.48	0.56	0.26	0.94	0.77	0.47	0.29	0.09	0.11		0.44	0.35	0.26
37	d__Bacteria; p__Pseudomonadota; c__Gammaproteobacteria; o__Methylococcales; f__Methylomonadaceae; g__KS41				abundant	4.74	0.446866	43	64.1791	no		0	0	0.01	0.05	0.2	0.01	0	0	0	0	0	0	0.08	0.01	0.02	0.05	0.06	0.01	0	0	0	0	0	0.28	0.01	0	0.02	0	0.58	0.09	0.79	0	0	0.67		0.03	0.11	0.81
38	d__Bacteria; p__Actinomycetota; c__Actinomycetia; o__Nanopelagicales; f__Nanopelagicaceae; g__AAA044-D11				abundant	2.37	0.432985	60	89.5522	no		0.04	0.02	0	0	0.15	0.05	0.08	0	0.02	0.22	0	0	0.3	0.87	0.26	0.41	0.51	1.51	0.21	0.13	0.05	0.32	0.17	0.57	0.23	0.5	2.37	0.23	1.59	1.42	0.58	1.17	0.77	0.65		0.06	0.03	0
39	d__Bacteria; p__Verrucomicrobiota; c__Verrucomicrobiae; o__Opitutales; f__Opitutaceae; g__Lacunisphaera				abundant	2.89	0.430896	54	80.597	yes	not validly published	0.18	0	0.19	0.24	0.57	0.24	0	0	0	1.35	0	0	0.08	0.45	0.46	0.59	0.12	0.16	0.05	0	0	0	0	0.47	0.04	0.49	0.2	0	0.27	0	0.23	0.02	0	0.39		1.17	1	0.62
40	d__Bacteria; p__Actinomycetota; c__Actinomycetia; o__Mycobacteriales; f__Mycobacteriaceae; g__Mycobacterium	taxonomy=Bacteria/Actinobacteriota/Actinobacteria/Corynebacteriales/Mycobacteriaceae/Mycobacterium		9	abundant	5.22	0.425373	62	92.5373	yes	validly published under the ICNP	1.44	0.56	0.24	0.13	0.02	0.04	0.39	0.11	0.07	0	0.06	0	0.19	0.17	0.08	0.19	0.55	0.31	5.22	0.13	0.26	0	0	0.01	0.13	0.23	0.07	0.03	0.3	0.69	1.01	0.13	0.02	0.13		0.59	0.94	0.22
41	d__Bacteria; p__Verrucomicrobiota; c__Verrucomicrobiae; o__Pedosphaerales; f__SXTU01; g__SXTU01				abundant	3.34	0.418657	34	50.7463	no		0.17	0	0.06	1.61	1.29	0.31	0	0	0	0	0	0	0.26	0.23	0.21	0.5	0.18	0	0	0	0	0	0	0	0.01	0	0	0	0.01	0	0	0	0	0		3.34	0.6	1.3
42	d__Bacteria; p__Planctomycetota; c__Phycisphaerae; o__Phycisphaerales; f__SM1A02; g__QWPT01				abundant	3.53	0.404179	63	94.0299	no		0.13	0.01	0.01	0.06	0.06	0.02	0.01	0.05	0	2.54	0	0.04	0.9	0.02	0.32	0.37	0.57	0.34	0.37	0	0.01	0	0.32	0.03	0.3	0.09	0.17	0.18	0.24	0.39	0.14	0.18	0.33	0.12		0.23	0.15	0.06
43	d__Bacteria; p__Pseudomonadota; c__Gammaproteobacteria; o__Burkholderiales; f__Nitrosomonadaceae; g__VFJL01				abundant	4.92	0.400746	35	52.2388	no		0	0	0	0	0.02	0	0	0	0	0	0	0	0.02	0.03	0.02	0.14	0	0	0	0	0	0	0	0.06	0.02	0.01	0.01	0	1.27	0	0	0	0	0.09		0	0.01	0.04
44	d__Bacteria; p__Planctomycetota; c__Phycisphaerae; o__Phycisphaerales; f__SM1A02; g__UBA966				abundant	2.26	0.389552	60	89.5522	no		0.7	0.15	0.08	0.3	0.14	0.37	0.1	0.15	0.01	0.11	0	0	0.44	0.71	0.53	1.01	1.3	0.62	1.44	0	0.01	0	0.19	0.28	0.93	1.84	0.4	0.39	0.39	1.91	0.21	0.11	0.1	0.3		0.3	0.1	0.06
45	d__Bacteria; p__Verrucomicrobiota; c__Verrucomicrobiae; o__Opitutales; f__Opitutaceae; g__CAITWF01				abundant	2.42	0.383284	57	85.0746	no		0.23	0	0.04	0.2	1.05	0.32	0.15	0	0	0.12	0	0	0.32	0.47	0.54	0.63	0.16	0.25	0.09	0	0.01	0	0	0.24	0.18	0.11	1.34	0	0.33	0.13	0.22	0.53	0	1.25		0.71	0.5	0.34
46	d__Bacteria; p__Verrucomicrobiota; c__Verrucomicrobiae; o__Chthoniobacterales; f__Terrimicrobiaceae; g__UBA967				abundant	4.95	0.382985	57	85.0746	no		0.31	0.05	0.29	0.23	0.17	0.01	1.25	0.44	0.37	0	0.03	0.28	0.98	0.05	0.77	0.04	0.26	0.2	2.24	0	0.13	0	0.03	0	0.21	0.38	0.1	0.23	0.74	0.08	0.02	0.16	2.59	1.1		0.13	0.06	0.11
47	d__Bacteria; p__Actinomycetota; c__Actinomycetia; o__Nanopelagicales; f__Nanopelagicaceae; g__UBA3012				abundant	1.86	0.348955	62	92.5373	no		0.34	0.03	0.31	0.45	0.14	0.28	0.24	0	0.01	0.38	0	0	0.38	0.73	0.25	0.59	0.19	0.54	0.05	0	0.03	0.02	0.08	0.28	0.14	0.35	0.23	0	0.63	0.22	0.21	0.16	0.04	0.21		0.69	0.83	0.13
48	d__Bacteria; p__Pseudomonadota; c__Gammaproteobacteria; o__Burkholderiales; f__Burkholderiaceae_B; g__Polaromonas	taxonomy=Bacteria/Proteobacteria/Gammaproteobacteria/Burkholderiales/Comamonadaceae/Polaromonas		3	abundant	1.64	0.328657	64	95.5224	yes	validly published under the ICNP	0.67	0.58	1.31	0.6	0.42	0.39	1.48	0.2	0.33	0.82	0.23	0.53	0.2	0.13	0.34	0.17	0.88	0.48	1.64	0	0.26	0.35	0.07	0.16	0.34	0.18	0.35	0.64	0.11	0.47	0.12	0.93	0.13	0.08		0.16	0.11	0.06
49	d__Bacteria; p__Pseudomonadota; c__Gammaproteobacteria; o__Burkholderiales; f__Thiobacillaceae; g__PFJX01				abundant	10.4	0.318955	7	10.4478	no		0	0	0	0	0	0	0	0	0	0	0	0	0	0	0	0	0	0	0	0	0	0	0	0.01	0	0	0	0	0	0	0	0	0	0.01		0	0	0
50	d__Bacteria; p__Pseudomonadota; c__Gammaproteobacteria; o__Methylococcales; f__Methylomonadaceae; g__UBA10906				abundant	2.64	0.310597	35	52.2388	no		0	0	0.01	0.01	0.11	0	0	0	0	0	0	0	0.02	0.02	0	0.02	0.02	0	0	0	0	0	0	0.06	0	0	0	0	0.03	0	0.37	0	0	2.64		0.12	0.53	0.54
51	d__Bacteria; p__Actinomycetota; c__Actinomycetia; o__Actinomycetales; f__Microbacteriaceae; g__Rhodoluna	taxonomy=Bacteria/Actinobacteriota/Actinobacteria/Micrococcales_3/Microbacteriaceae/luna/Candidatus Limnoluna		3	abundant	2.38	0.300746	55	82.0896	yes	validly published under the ICNP	0.03	0.21	0.16	0.12	0.01	0.03	0.15	0.3	0.46	0.02	0.32	0.45	0.24	0.02	0.03	0.04	0.08	0.01	0.58	0.59	1.71	1.76	2.38	1.05	0.15	0.03	0.23	2	0.14	0.69	0.24	0.85	1.97	0.18		0	0.01	0
52	d__Bacteria; p__Pseudomonadota; c__Alphaproteobacteria; o__Sphingomonadales; f__Sphingomonadaceae; g__Sphingorhabdus_B	taxonomy=Bacteria/Proteobacteria/Alphaproteobacteria/Sphingomonadales_Sphingomonadaceae/Sphingorhabdus_1		10	abundant	2.13	0.287313	63	94.0299	yes		0.52	0.09	0.35	0.23	0.54	0.17	0.41	1.21	0.24	0.13	1.46	1.12	0.17	0.14	0.6	0.54	0.78	0.15	0.72	0.04	0.25	0.08	0.02	0.06	0.31	0.33	0.22	1.55	0.24	2.13	0.12	0.62	0.06	0.11		0.11	0.02	0.02
53	d__Bacteria; p__Bacteroidota; c__Bacteroidia; o__Chitinophagales; f__Saprospiraceae; g__BJGN01				abundant	1.74	0.284776	48	71.6418	no		0.52	0.67	0.01	0.21	0.01	0	0.96	0.36	0.37	0.17	1.05	1.63	0	0.01	0.26	0	1.04	0.05	0.64	0	1.46	0	0	0.07	0.21	0.03	0.03	0.66	0	0.81	0.06	0.24	0.08	0.05		0.09	0.03	0
54	d__Archaea; p__Thermoproteota; c__Nitrososphaeria; o__Nitrososphaerales; f__Nitrosopumilaceae; g__Nitrosarchaeum				abundant	9.55	0.256269	16	23.8806	yes	validly published under the ICNP	0	0	0	0	0	0	0	0	0	0.01	0	0	0.03	0.01	0	0	0	0	0	0	0	0	0	0	0	0	0	0	0	0	0	0	0	0		0	0.03	0.01
55	d__Bacteria; p__Actinomycetota; c__Acidimicrobiia; o__IMCC26256; f__PALSA-555; g__SHUY01				abundant	1.8	0.243881	46	68.6567	no		0.21	0	0.12	0.01	0.14	0.02	0	0	0	0.07	0	0	0.38	0.2	0.54	0.44	0.17	0.06	0.02	0	0	0	0	0	0.08	0.01	0	0	0.06	0	0	0	0	0		0.67	1.14	0.23
56	d__Bacteria; p__Actinomycetota; c__Thermoleophilia; o__Solirubrobacterales; f__Solirubrobacteraceae; g__F1-60-MAGs163				abundant	1.48	0.242985	55	82.0896	no		0.33	0.02	0.07	0.01	0.02	0.01	0.02	0	0	0.09	0	0	0.38	0.1	0.31	0.14	0.3	0.07	0.1	0	0.01	0.01	0	0.02	0.14	0.08	0.02	0	0.11	0.65	0.04	0	0	0		0.52	0.66	0.29
57	d__Bacteria; p__Bacteroidota; c__Bacteroidia; o__Cytophagales; f__Spirosomaceae; g__Aquirufa				abundant	1.22	0.233134	65	97.0149	yes	validly published under the ICNP	0.29	0.19	0.34	0.45	0.69	0.56	1.22	0.2	0.34	0.08	0.04	0.26	0.62	0.39	0.61	0.22	0.65	0.36	0.02	0.16	0.08	0.23	0.2	0.04	0.37	0.37	0.31	0.01	0.15	0.06	0.61	0.29	0.19	0.27		0.16	0.06	0.07
58	d__Bacteria; p__Bacteroidota; c__UBA10030; o__UBA10030; f__UBA8401; g__SXSI01				abundant	4.2	0.232239	17	25.3731	no		0.03	0	0.23	0.05	0.1	0	0	0	0	0	0	0	0.01	0	0	0	0	0	0	0	0	0	0	0	0	0	0	0	0	0	0	0	0	0		0.45	0.76	4.2
59	d__Bacteria; p__Acidobacteriota; c__Holophagae; o__Holophagales; f__Holophagaceae; g__UBA12189				abundant	2.57	0.229701	35	52.2388	no		0.13	0	0.96	0.59	0.46	0.79	0.01	0	0	0	0	0	0.41	2.57	0.32	1.54	0.44	0.17	0	0	0	0.01	0	0.01	0.07	0.05	0	0	0	0	0	0	0	0		0.33	0.37	0.55
60	d__Bacteria; p__Verrucomicrobiota; c__Verrucomicrobiae; o__Verrucomicrobiales; f__Akkermansiaceae; g__Luteolibacter				abundant	1.75	0.227164	52	77.6119	yes	validly published under the ICNP	0.3	1.24	0	0	0	0	0.48	0.09	0.22	0.12	0.15	0.5	0.08	0	0.07	0.02	0.23	0.11	1.75	0	0.14	0	0.03	0.1	0.05	0.67	0	0	0	0	0.01	0.04	0.17	0.01		0.05	0.11	0.01
61	d__Bacteria; p__Pseudomonadota; c__Gammaproteobacteria; o__Burkholderiales; f__Rhodocyclaceae; g__Sulfuritalea				abundant	6.56	0.224478	20	29.8507	yes	validly published under the ICNP	0	0	0	0	0	0	0	0	0	0	0	0	0	0	0	0	0	0	0	0	0	0	0	0.07	0	0	0	0	0.02	0	0.02	0	0	0.01		0	0	0
62	d__Bacteria; p__Verrucomicrobiota; c__Verrucomicrobiae; o__Chthoniobacterales; f__Chthoniobacteraceae; g__SXWH01				abundant	4.88	0.209104	34	50.7463	no		0.03	0	0	0.01	0.02	0.02	0	0	0	0	0	0	0	4.88	0	0.17	0	0	0	0	0	0	0	0.08	0	1.37	0	0	0.13	0	0.19	0	0	0		0.63	0.34	0.27
63	d__Bacteria; p__Bacteroidota; c__Kapabacteria; o__Kapabacteriales; f__UBA961; g__UBA961				abundant	3.4	0.207612	41	61.194	no		0.04	0	0	0	0	0	0.02	0	0	0.01	0	0.07	0.03	0.18	0.35	0.65	0.12	0.13	0	0	0.02	0	0.02	0.06	0.36	0.72	0	0.06	0	0	0.49	0	0.01	0.35		0.09	0.12	0.01
64	d__Bacteria; p__Planctomycetota; c__Planctomycetia; o__Pirellulales; f__UBA1268; g__BAIKAL-G1-2R				abundant	2.06	0.205075	45	67.1642	no		1.16	0	0.36	0.03	0.01	0	0.07	0	0	0.06	0	0	0.02	0.02	0.3	0.05	0.4	0.02	0.06	0	0	0	0	0	0.05	0	0	0	0.01	0	0	0	0	0		1.68	0.59	0.27
65	d__Bacteria; p__Actinomycetota; c__Actinomycetia; o__Nanopelagicales; f__S36-B12; g__GCA-2737125				abundant	1.05	0.204328	56	83.5821	no		0.2	0	0.21	0.07	0.07	0.03	0.09	0	0	0.73	0	0.02	0.07	0.06	0.14	0.14	0.09	0.05	1	0	0.01	0	0	0.02	0.05	0.02	0.01	0	0.09	0.39	0.08	0	0	0.02		0.37	0.39	0.36
66	d__Bacteria; p__Bacteroidota; c__Bacteroidia; o__Chitinophagales; f__Chitinophagaceae; g__Ferruginibacter				abundant	1.82	0.200746	62	92.5373	yes	validly published under the ICNP	0.14	0.12	0.07	0.31	0.1	0.11	0.04	0.01	0.01	0.14	0	0	0.62	0.09	0.22	0.32	0.17	0.19	0.01	0	0.01	0.02	0.01	0.01	0.68	0.04	0.75	0.11	0.6	0.25	0.08	0.3	0.07	0.21		0.1	0.11	0.01
67	d__Bacteria; p__Actinomycetota; c__Actinomycetia; o__Actinomycetales; f__Microbacteriaceae; g__Pontimonas	taxonomy=Bacteria/Actinobacteriota/Actinobacteria/Micrococcales_3/Microbacteriaceae		1	abundant	8.85	0.193582	18	26.8657	yes	validly published under the ICNP	0	0	0	0	0	0	0	1.19	0.14	0.03	8.85	0.64	0	0	0	0	0	0	0.38	0	0.53	0	0.05	0.01	0	0	0	0.19	0	0	0.01	0	0	0		0	0	0
68	d__Bacteria; p__Verrucomicrobiota; c__Verrucomicrobiae; o__Pedosphaerales; f__SIAT01; g__SIAT01				abundant	3.02	0.189701	20	29.8507	no		0.07	0	0.06	0.3	0.52	0.01	0	0	0	0	0	0	0.02	0	0.02	0	0	0	0	0	0	0	0	0	0	0	0	0	0	0	0	0	0	0		3.02	1.79	1.1
69	d__Bacteria; p__Bacteroidota; c__Bacteroidia; o__Flavobacteriales; f__Crocinitomicaceae; g__40-80				abundant	2.43	0.185224	46	68.6567	no		0.01	0	0.01	0.12	0.3	0.24	0	0	0	0.16	0	0	0.21	0.33	1.6	0.06	0.69	0.03	0.85	0	0.02	0.86	0.02	0.21	0	0.12	0.59	0.18	0.22	0.72	0.26	0.16	0.05	0.14		0.07	0.05	0.02
70	d__Bacteria; p__Bacteroidota; c__Bacteroidia; o__UBA7662; f__UBA7662; g__SYHX01				abundant	2.5	0.183433	25	37.3134	no		0	0.3	0	0.11	0	0.08	0	0.76	1.34	0	2.5	2	0	0.12	0	0.35	0	0.12	0	0	1.36	0	0.24	0.02	0	0.13	0	1.4	0	0	0.06	0	0.07	0		0	0.01	0
71	d__Bacteria; p__Pseudomonadota; c__Alphaproteobacteria; o__Rickettsiales; f__UBA1997; g__UBA2645				abundant	1.19	0.183284	63	94.0299	no		0.14	0.61	0.14	0.28	0.18	0.22	0.38	0.02	0.02	0.01	0.02	0.24	0.01	0.07	0.08	0.13	0.32	0.13	0.01	0	0.01	0	0.01	0.06	0.07	0.16	0.13	0	0.11	0	0.02	0.07	0.02	0.17		0.2	0.1	0.04
72	d__Bacteria; p__Verrucomicrobiota; c__Kiritimatiellia; o__RFP12; f__JAAYNR01; g__VGWG01				abundant	8.71	0.181045	11	16.4179	no		0	0	0	0	0	0	0	0	0	0	0	0	0	0	0	0	0	0	0	0	0	0	0	0.04	0	0	0	0	0	0	0	0	0	0.03		0	0	0
73	d__Bacteria; p__Pseudomonadota; c__Gammaproteobacteria; o__Burkholderiales; f__Burkholderiaceae; g__SYFN01	taxonomy=Bacteria/Proteobacteria/Gammaproteobacteria/Burkholderiales/Oxalobacteraceae/uncultured		3	abundant	1.09	0.174776	62	92.5373	no		0.09	0.03	0.12	0.08	0.43	0.53	0.07	0	0.05	0.2	0	0	0.1	0.48	0.21	0.35	0.2	0.45	0.34	0	0.07	0.28	0.97	0.19	0.29	0.38	0.23	1.09	0.06	0.18	0.18	0.37	0.9	0.08		0.09	0.1	0.03
74	d__Bacteria; p__Verrucomicrobiota; c__Verrucomicrobiae; o__Opitutales; f__Opitutaceae; g__Tous-C4FEB				abundant	1.35	0.174478	61	91.0448	no		0.19	0	0.13	0.29	0.03	0.04	0.1	0.01	0.15	0.78	0	0.07	0.01	0.16	0.24	0.06	0.04	0.34	0.2	0	0.11	0.33	0.23	0.15	0.13	0.11	0.8	0.18	0.01	0.15	0.12	0.74	0.03	0.17		0.11	0.03	0.04
75	d__Bacteria; p__Pseudomonadota; c__Alphaproteobacteria; o__Rickettsiales; f__UBA1997; g__SYAR01				abundant	1.82	0.171791	54	80.597	no		0.03	0.16	0.09	0.36	0.4	0.09	0	0.01	0.03	0.01	0.04	0.01	0.06	0.02	0.13	0.72	0.11	0.06	0.17	0	0.16	0.52	0.04	0.47	0.58	0.05	1.82	0	0.05	0.11	0.24	0.2	0.05	0.22		0.14	0.39	0.14
76	d__Bacteria; p__Chloroflexota; c__Anaerolineae; o__Anaerolineales; f__EnvOPS12; g__OLB14				abundant	4.01	0.163881	10	14.9254	no		0	0	0	0	0	0	0	0	0	0	0	0	0	0	0	0	0	0	0	0	0	0	0	0.01	0	0	0	0	0	0	0	0	0	0.01		0	0	0
77	d__Bacteria; p__Chloroflexota; c__UBA2235; o__UBA12225; f__UBA12225; g__UBA12225				abundant	1.43	0.16	42	62.6866	no		0.11	0	0.07	0.08	0.05	0.02	0	0	0	0.05	0	0	0.08	1.06	0.06	0.31	0.07	0.06	0	0	0	0	0	0	0.03	0.11	0.01	0	0.13	0	0	0	0	0.09		0.18	0.13	0.16
78	d__Bacteria; p__Bacteroidota; c__Bacteroidia; o__Sphingobacteriales; f__CAIKLP01; g__CAIKLP01				abundant	1.89	0.159552	42	62.6866	no		0	0	0	0	0.04	0.08	0.05	0	0.01	0	0	0	0.03	0.01	0.24	0.08	0.05	0.06	0.02	0	0	0.55	0	0.15	1.89	0.04	0.19	0	0.01	1.46	0.75	1.23	0	0.33		0	0	0
79	d__Bacteria; p__Actinomycetota; c__Actinomycetia; o__Nanopelagicales; f__Nanopelagicaceae; g__QYPT01				abundant	1.96	0.154776	51	76.1194	no		0.04	0	0	0.01	0.01	0.01	0	0	0	0.06	0	0	0.17	0.05	0.16	0.04	0.04	0.01	0.01	0	0	0	0.01	0.07	0.03	0.01	0.07	0.02	0.59	0	0.06	0.03	0.01	0.07		0.18	0.25	0
80	d__Bacteria; p__Actinomycetota; c__Thermoleophilia; o__Miltoncostaeales; f__Miltoncostaeaceae; g__SYFI01				abundant	1.14	0.145672	53	79.1045	no		0.2	0	0.39	0.09	0.2	0.17	0	0	0	0.64	0	0.01	0.2	0.34	0.18	0.15	0.14	0.04	0.17	0	0	0	0.05	0.02	0.06	0.14	0	0	0.24	0	0.1	0	0	0.05		0.31	0.23	0.3
81	d__Bacteria; p__Bacteroidota; c__Bacteroidia; o__Flavobacteriales; f__UA16; g__CAIZGX01				abundant	1.84	0.145224	56	83.5821	no		0.47	0.15	0.53	0.11	0.29	0.12	0.03	0	0.18	0	0.21	0.14	0.38	0.09	1.84	0.09	0.49	0.04	0.01	0	0.07	0	0.09	0.02	0.91	0.08	0.08	0.09	0.16	0.15	0.71	0.03	0	0.05		0.06	0.02	0.03
82	d__Bacteria; p__Verrucomicrobiota; c__Verrucomicrobiae; o__Opitutales; f__Opitutaceae; g__ER46				abundant	1.24	0.141791	48	71.6418	no		0.01	0	0.01	0.01	0.04	0	0	0	0	0.39	0	0	0	0.01	0.02	0.12	0.01	0	0	0	0	0	0.05	0.03	0	0.23	0.02	0	0.3	0	0.1	0	0.05	0.14		0.31	0.25	0.14
83	d__Bacteria; p__Verrucomicrobiota; c__Verrucomicrobiae; o__Chthoniobacterales; f__JACTMZ01; g__JACTMZ01				abundant	1.47	0.141343	36	53.7313	no		1.28	0.48	0.08	0.14	0	0	0.02	0.4	0.08	0	0.91	0.34	0	0	0.37	0	0.47	0.17	0.56	0.16	1.47	0	0	0	0.01	0.51	0	0.08	0	0	0	0	0	0		0.18	0.08	0.01
84	d__Bacteria; p__Pseudomonadota; c__Gammaproteobacteria; o__Steroidobacterales; f__Steroidobacteraceae; g__UBA964				abundant	1.13	0.140896	55	82.0896	no		0.23	0.02	0.31	0.39	0.06	0.49	0.32	0	0	0.03	0	0	0.05	0.6	0.29	0.41	0.17	0.55	0.05	0	0.01	0	0.19	0.02	0.35	0.51	0.01	1.13	0.01	0	0.12	0	0.34	0		0.15	0.12	0.09
85	d__Bacteria; p__Actinomycetota; c__Actinomycetia; o__Nanopelagicales; f__Nanopelagicaceae; g__GCA-2737595				abundant	1.15	0.137463	48	71.6418	no		0.53	0.04	1.15	0.6	0.18	0.16	0.05	0	0	0.04	0	0	0.2	0.06	0.12	0.05	0.19	0.04	0	0	0	0	0	0	0.14	0	0.05	0	0.13	0	0	0.01	0	0.01		0.69	0.77	0.25
86	d__Bacteria; p__Planctomycetota; c__Phycisphaerae; o__Phycisphaerales; f__SM1A02; g__F1-140-MAGs142				abundant	1.52	0.131045	36	53.7313	no		0.28	0	0	0.01	0.07	0	0	0	0	0.88	0	0.01	0.02	0	0.24	0.02	0.28	0.03	0.72	0	0	0	0	0	0.19	0	0	0	0	0.06	0	0	0	0		0.32	0.18	0.01
87	d__Bacteria; p__Verrucomicrobiota; c__Verrucomicrobiae; o__Verrucomicrobiales; f__Verrucomicrobiaceae; g__Prosthecobacter				abundant	3.17	0.127164	40	59.7015	yes	validly published under the ICNP	0.04	0.19	0	0	0	0	0.03	0	0.02	0.19	0	0.01	0	0	0.03	0	0	0.09	0	0	0.05	0	0.36	0.07	0	0	0.04	0.49	3.17	0	0.01	0.11	0.43	0.2		0.13	0.02	0
88	d__Bacteria; p__Acidobacteriota; c__Vicinamibacteria; o__Vicinamibacterales; f__UBA2999; g__Gp6-AA40				abundant	1.45	0.12403	28	41.791	no		0	0	0	0.02	0.02	0	0	0	0	0	0	0	0	0	0	0.01	0	0	0	0	0	0	0	0	0	0	0	0	0.08	0	0	0	0	0		0.18	0.53	1.45
89	d__Bacteria; p__Pseudomonadota; c__Alphaproteobacteria; o__Sphingomonadales; f__Sphingomonadaceae; g__Sandarakinorhabdus	taxonomy=Bacteria/Proteobacteria/Alphaproteobacteria/Sphingomonadales_Sphingomonadaceae/Sandarakinorhabdus		3	abundant	2.67	0.119701	35	52.2388	yes	validly published under the ICNP	0.1	0.12	0.05	0.38	0	0.13	0.05	1.87	0.11	0.02	2.67	0.34	0.01	0.1	0.02	0.11	0.11	0.18	0.14	0	0.44	0	0.07	0.02	0.1	0.09	0	0.18	0	0	0.02	0	0	0		0	0.01	0.01
90	d__Bacteria; p__Verrucomicrobiota; c__Verrucomicrobiae; o__Chthoniobacterales; f__Chthoniobacteraceae; g__Chth-196				abundant	2.44	0.117612	36	53.7313	no		0	0	0	0.01	0	0.08	0	0	0	0	0	0	0	0.15	0.03	0.13	0.01	0.15	0	0	0	0	0.03	0.09	0.08	0.08	0.25	0.07	0.29	0	0.22	0.06	0.13	2.44		0.05	0.03	0
91	d__Bacteria; p__Planctomycetota; c__Planctomycetia; o__Pirellulales; f__UBA1268; g__QWPN01				abundant	1.05	0.11403	58	86.5672	no		0.43	0.2	0.03	0.08	0.01	0.01	0.07	0.01	0.01	0	0.11	0.09	0.04	0.05	0.11	0.01	0.67	0.04	0.34	0.07	0.15	0	0	0	0.12	0.02	0	1.05	0.05	0.06	0.08	0	0.01	0.04		0.24	0.27	0.05
92	d__Bacteria; p__Planctomycetota; c__Planctomycetia; o__Gemmatales; f__Gemmataceae; g__SYLG01				abundant	1.18	0.105373	30	44.7761	no		0.07	0	0.02	0.12	0.05	0.04	0.01	0	0	0	0	0	0	0.02	0.09	0.07	0.14	0.06	0	0	0	0	0	0	0.02	0	0	0	0.01	0	0	0	0	0		0.27	0.83	0.23
93	d__Bacteria; p__Verrucomicrobiota; c__Kiritimatiellia; o__RFP12; f__UBA1067; g__CAIZQW01				abundant	4.95	0.105075	9	13.4328	no		0	0	0	0	0	0	0	0	0	0	0	0	0	0	0	0	0	0	0	0	0	0	0	0	0	0	0	0	0	0	0	0	0	0.01		0	0	0
94	d__Bacteria; p__Pseudomonadota; c__Gammaproteobacteria; o__Burkholderiales; f__SG8-39; g__RBG-16-66-20				abundant	2.29	0.103731	16	23.8806	no		0.05	0	0.22	0.07	0.04	0	0	0	0	0	0	0	0	0	0	0	0	0	0	0	0	0	0	0	0	0	0	0	0	0	0	0	0	0		0.33	0.55	1.53
95	d__Bacteria; p__Planctomycetota; c__Planctomycetia; o__Planctomycetales; f__Planctomycetaceae; g__SXKJ01				abundant	1.23	0.102687	22	32.8358	no		0	0	0	0.01	0.01	0	0	0	0	0.12	0	0	0	0	0.01	0	0	0	0	0	0	0	0	0	0	0	0	0	0.02	0	0	0	0	0		0.08	0.21	0.33
96	d__Bacteria; p__Actinomycetota; c__Acidimicrobiia; o__Acidimicrobiales; f__Ilumatobacteraceae; g__F1-60-MAGs027				abundant	1.07	0.102388	40	59.7015	no		0.2	0.26	0.44	0.42	0.05	0.12	0.02	0.02	1.07	0	0	0	0.05	0.96	0.01	0.22	0.05	0.31	0.01	0	0.09	0	0.1	0.05	0.01	0.32	0	0.45	0	0	0	0	0	0		0.24	0.26	0.18
97	d__Bacteria; p__Verrucomicrobiota; c__Verrucomicrobiae; o__Pedosphaerales; f__UBA1100; g__CAMDOH01				abundant	1.81	0.102239	14	20.8955	no		0	0	0.01	0.02	0.02	0	0	0	0	0	0	0	0	0	0	0	0	0	0	0	0	0	0	0	0	0	0	0	0	0	0	0	0	0		0.22	0.36	1.81
98	d__Bacteria; p__Pseudomonadota; c__Gammaproteobacteria; o__Pseudomonadales; f__Pseudohongiellaceae; g__CAILUG01				abundant	1.06	0.10209	48	71.6418	no		0.03	0	0.04	0.08	0.56	0.43	0	0	0	0.13	0	0	0	0.1	0.03	0.06	0.12	0.15	0	0	0	0	0	0.08	0	0.04	0.62	0.05	0.14	0	0.04	0.02	0.04	0.05		0.24	0.09	0.08
99	d__Bacteria; p__Bacillota; c__Bacilli; o__RFN20; f__CAG-826; g__UBA970				abundant	1.41	0.0986567	20	29.8507	no		0	0.01	0	0	0	0	0	0.37	0.07	0.1	1.06	1.41	0	0	0	0	0	0.89	0.03	0	1.31	0.08	0.3	0.13	0	0	0	0	0	0	0.14	0	0	0		0	0	0
100	d__Bacteria; p__Campylobacterota; c__Campylobacteria; o__Campylobacterales; f__Sulfurimonadaceae; g__Sulfurimonas				abundant	3.42	0.0962687	11	16.4179	yes	validly published under the ICNP	0	0	0	0	0	0	0	0	0	0	0	0	0	0	0	0	0	0	0	0	0	0	0	0	0	0	0	0	0	0	0	0	0	0		0	0	0
101	d__Bacteria; p__Actinomycetota; c__Actinomycetia; o__Nanopelagicales; f__UBA5976; g__AcAMD-5				abundant	2.87	0.0950746	26	38.806	no		0	0	0	0	0	0	0.03	0	0.05	0	0	0	0	0.11	0	0.06	0	0.05	0.37	2.87	0.48	0.01	1	0.05	0	0.14	0	0.36	0	0	0.04	0	0	0		0	0	0
102	d__Bacteria; p__Patescibacteria; c__Paceibacteria; o__UBA9983_A; f__SBAW01; g__GWA1-54-10				abundant	1.36	0.089403	43	64.1791	no		0.01	0	0.02	0.01	0.06	0.01	0.05	0	0	0.09	0.01	0.02	0.06	0.04	0	0	0.01	0	0	0	0	0	0	0.01	0	0	0.01	0	0.01	0	0	0	0	0.02		0.01	0.02	0.19
103	d__Bacteria; p__Bacteroidota; c__Bacteroidia; o__Bacteroidales; f__Paludibacteraceae; g__Paludibacter				abundant	2.49	0.0867164	13	19.403	yes	validly published under the ICNP	0	0	0	0	0	0	0	0	0	0	0	0	0	0	0	0	0	0	0	0	0	0	0	0	0	0	0	0	0	0	0	0	0.01	0.03		0	0	0
104	d__Bacteria; p__Verrucomicrobiota; c__Kiritimatiellia; o__CAIKKV01; f__CAITUY01; g__JAABPW01				abundant	5.07	0.0864179	3	4.47761	no		0	0	0	0	0	0	0	0	0	0	0	0	0	0	0	0	0	0	0	0	0	0	0	0	0	0	0	0	0	0	0	0	0	0		0	0	0
105	d__Bacteria; p__Verrucomicrobiota; c__Verrucomicrobiae; o__Pedosphaerales; f__UBA1100; g__SYLI01				abundant	1.85	0.0862687	10	14.9254	no		0	0	0	0	0	0	0	0	0	0	0	0	0	0	0	0	0	0	0	0	0	0	0	0	0	0	0	0	0	0	0	0	0	0		0.47	1.2	1.85
106	d__Bacteria; p__Planctomycetota; c__Planctomycetia; o__Pirellulales; f__Pirellulaceae; g__Pirellula_B				abundant	1.23	0.0840299	36	53.7313	no		0.17	0.24	0.02	0.01	0	0.02	0	0	0	0	0	0	0	0.02	0	0	0.02	0.31	0.56	0	0.01	0	0	0	0	0.04	0	1.23	0	0	0.05	0.01	0.12	0		0.14	0.16	0.07
107	d__Bacteria; p__Pseudomonadota; c__Alphaproteobacteria; o__Rhizobiales; f__Xanthobacteraceae; g__Pseudolabrys				abundant	1.01	0.0819403	29	43.2836	yes	validly published under the ICNP	0	0	0	0	0	0	0	0	0	0.06	0	0.01	0.01	0	0	0	0.01	0	0	0	0	0	0	0	0	0	0	0	0.16	0	0	0	0	0		0.01	0.01	0.01
108	d__Bacteria; p__Actinomycetota; c__Actinomycetia; o__Actinomycetales; f__Microbacteriaceae; g__Aquiluna	taxonomy=Bacteria/Actinobacteriota/Actinobacteria/Micrococcales_3/Microbacteriaceae/luna/Candidatus Aquiluna		2	abundant	1.27	0.0816418	28	41.791	yes	validly published under the ICNP	0	0.24	0	0	0	0	0	0.55	0.22	0.08	1.27	0.64	0.03	0.04	0	0	0	0.01	0	0.93	0.28	0.01	0.02	0.03	0	0	0	0.48	0	0	0.01	0	0.01	0.02		0	0.01	0
109	d__Bacteria; p__Actinomycetota; c__Acidimicrobiia; o__Acidimicrobiales; f__Ilumatobacteraceae; g__WLMZ01				abundant	1.38	0.081194	24	35.8209	no		0	0	0	0	0	0	0.01	0	0	0	0	0	0.02	0	0	0	0.01	0	0	0	0	0	0	0	0.01	0	0.09	0	0.51	0	0	0	0	0.08		0	0	0
110	d__Bacteria; p__Pseudomonadota; c__Gammaproteobacteria; o__Burkholderiales; f__UBA3065; g__UBA3065	taxonomy=Bacteria/Proteobacteria/Gammaproteobacteria/Burkholderiales/Rhodocyclaceae_2/uncultured		1	abundant	1.76	0.0801493	12	17.9104	no		0.05	1.36	0	0	0	0	0	1.76	0.39	0	1.26	0.43	0	0	0	0	0	0	0	0	0.01	0	0	0	0	0	0	0.01	0	0	0	0	0	0		0.01	0.04	0
111	d__Bacteria; p__Bacteroidota; c__Bacteroidia; o__CAIKAF01; f__CAIKAF01; g__CAIKAF01				abundant	1.55	0.079403	17	25.3731	no		0.01	0.01	0	0	0	0	0	0.96	0.1	0	0.07	0.4	0	0	0	0.07	0	0.1	0	0.13	1.55	0	0	0.05	0	0	0	0	0	0	0	0	0	0		0	0	0
112	d__Bacteria; p__Acidobacteriota; c__Terriglobia; o__Bryobacterales; f__Bryobacteraceae; g__Ga0077553				abundant	1.24	0.0755224	43	64.1791	no		0.06	0	0	0.01	0.01	0.01	0	0	0	0	0	0	0	0.07	0.03	0.11	0.02	0.09	1.24	0	0	0	0.01	0.01	0	0.11	0	0.03	0.07	0	0.04	0	0	0.06		0.18	0.21	0.16
113	d__Bacteria; p__Bacteroidota; c__Bacteroidia; o__Bacteroidales; f__UBA4417; g__UBA4417				abundant	2.02	0.0737313	8	11.9403	no		0	0	0	0	0	0	0	0	0	0	0	0	0	0	0	0	0	0	0	0	0	0	0	0	0	0	0	0	0	0	0	0	0	0.01		0	0	0
114	d__Bacteria; p__Planctomycetota; c__Planctomycetia; o__Planctomycetales; f__Planctomycetaceae; g__Schlesneria				abundant	1.12	0.0726866	37	55.2239	yes	validly published under the ICNP	0.02	0	0.02	0	0	0	0	0	0	0.15	0	0	0	0.04	0.04	0.2	0.02	0.03	0.08	0	0	0	0	0	0	0	0.01	0	0.53	0.14	0	0	0	0		0.1	0.02	0.01
115	d__Bacteria; p__Campylobacterota; c__Campylobacteria; o__Campylobacterales; f__Arcobacteraceae	taxonomy=Bacteria/Campilobacterota/Campylobacteria/Campylobacterales/Arcobacteraceae/Pseudarcobacter_2	SUMMED up at family level (2 genera)	1	abundant	3.01	0.0720896	6	8.95522	yes	validly published under the ICNP	0	0	0	0	0	0	0	0	0	0	0	0	0	0.01	0	0	0	0	0	0	0	0	0	0	0	0	0	0	0	0	0	0	0	0		0	0	0
116	d__Bacteria; p__Pseudomonadota; c__Gammaproteobacteria; o__Methylococcales; f__Methylomonadaceae; g__Methylomonas				abundant	3.91	0.0658209	6	8.95522	yes	validly published under the ICNP	0	0	0	0	0	0	0	0	0	0	0	0	0	0	0	0	0	0	0	0	0	0	0	0	0	0	0	0	0	0	0.4	0	0	0.02		0	0	0
117	d__Bacteria; p__Myxococcota; c__UBA796; o__UBA796; f__SXON01; g__SXON01				abundant	3.19	0.0628358	31	46.2687	no		0	0	0	0.06	0.01	0	0	0	0	0	0	0	0	0.01	0.01	0.01	0.01	0.01	0	0	0	0	0.01	0	0	0.01	0.02	0	0.09	0	0	0	0	0		0.01	0.08	0.03
118	d__Bacteria; p__Verrucomicrobiota; c__Verrucomicrobiae; o__Verrucomicrobiales; f__Akkermansiaceae; g__Haloferula				abundant	1.24	0.0583582	21	31.3433	yes	validly published under the ICNP	0.03	0.33	0	0	0	0	0.01	0.06	0	0.13	0	0.03	0	0	0	0	0.05	0.04	1.24	0	0.09	0	0	0	0	0	0	0	0	0	0	0	0	0		0	0.02	0
119	d__Bacteria; p__Myxococcota; c__UBA727; o__UBA727; f__VGSZ01; g__VGSZ01				abundant	1.01	0.0567164	31	46.2687	no		0.09	0	0	0	0.03	0	0.01	0	0	0	0	0	0	0	0.02	0	0.04	0.01	0.73	0	0	0	0	0	0.06	0	0.08	0	0.01	0	0	0	0.02	0		0.09	0.11	0.01
120	d__Bacteria; p__Verrucomicrobiota; c__Verrucomicrobiae; o__Chthoniobacterales; f__Chthoniobacteraceae; g__Chthoniobacter				abundant	2.16	0.0546269	28	41.791	yes	not validly published	0.02	0	0	0.01	0	0	0	0	0	0	0	0	0	0.02	0.01	0.04	0	0.02	0	0	0	0	0	0.09	0	0.56	0	0	0	0	0.05	0	0	0.01		0.25	0.01	0
121	d__Bacteria; p__Pseudomonadota; c__Alphaproteobacteria; o__Rickettsiales; f__UBA1997; g__UBA2645_A				abundant	2.13	0.0543284	24	35.8209	no		0	0	0	0	0	0	0	0	0	0.25	0	0	0	0	0	0.14	0	0	0	0	0	0	0	0.01	0	0	0.01	0	0.01	0	0.01	0	0	0.01		0.01	0.02	0
122	d__Bacteria; p__Bacteroidota; c__Bacteroidia; o__Chitinophagales; f__Chitinophagaceae; g__JJ008				abundant	1.7	0.0525373	14	20.8955	no		0	0	0	0	0	0	0	0	0	0	0	0	0.02	0.65	0	0.17	0	0.03	0	0	0	0	0.25	0	0	0.44	0	1.7	0.01	0	0.03	0	0.16	0		0	0	0
123	d__Bacteria; p__Bacteroidota; c__Bacteroidia; o__Bacteroidales; f__Prolixibacteraceae; g__UBA6024				abundant	1.59	0.050597	8	11.9403	no		0	0	0	0	0	0	0	0	0	0	0	0	0	0	0	0	0	0	0	0	0	0	0	0	0	0	0	0	0	0	0	0	0	0.01		0	0	0
124	d__Bacteria; p__Verrucomicrobiota; c__Kiritimatiellia; o__Kiritimatiellales; f__Tichowtungiaceae; g__Tichowtungia				abundant	2.05	0.0486567	15	22.3881	yes	validly published under the ICNP	0	0	0	0	0	0	0	0	0	0	0	0	0	0	0	0	0	0	0	0	0	0	0	0	0	0	0	0	0	0	0	0	0	0.03		0	0	0
125	d__Bacteria; p__Desulfobacterota; c__Desulfomonilia; o__Desulfomonilales; f__Desulfomonilaceae; g__CAJBEZ01				abundant	3.08	0.0471642	4	5.97015	no		0	0	0	0	0	0	0	0	0	0	0	0	0	0	0	0	0	0	0	0	0	0	0	0	0	0	0	0	0	0	0	0	0	0		0	0	0
126	d__Bacteria; p__Planctomycetota; c__Phycisphaerae; o__Phycisphaerales; f__SM1A02; g__SYIB01				abundant	1.45	0.0468657	22	32.8358	no		0	0.09	0	0.08	0	0.01	0	1.45	0.17	0	0	0.24	0	0.16	0	0.08	0	0.01	0	0	0.36	0	0.05	0	0	0.11	0	0.08	0	0	0	0	0.07	0		0	0	0
127	d__Bacteria; p__Pseudomonadota; c__Gammaproteobacteria; o__Burkholderiales; f__Burkholderiaceae_B; g__Paucibacter_A	taxonomy=Bacteria/Proteobacteria/Gammaproteobacteria/Burkholderiales/Comamonadaceae/Paucibacter		2	abundant	1.41	0.0450746	22	32.8358	yes		0	0	0	0	0	0	0	0	0	0	0	0	0	0	0.03	0	0.01	0.01	0	0	0	0	0	0	0	0.02	0.03	0	0.08	0	0	0.03	0	0.34		0	0	0
128	d__Bacteria; p__Desulfobacterota; c__Desulfobacteria; o__Desulfobacterales; f__Desulfatirhabdiaceae; g__RAAP-1				abundant	2.05	0.0407463	7	10.4478	no		0	0	0	0	0	0	0	0	0	0	0	0	0	0	0	0	0	0	0	0	0	0	0	0	0	0	0	0	0	0	0	0	0	0.01		0	0	0
129	d__Bacteria; p__Verrucomicrobiota; c__Verrucomicrobiae; o__Opitutales; f__Opitutaceae; g__IMCC26134_A				abundant	1.35	0.0404478	10	14.9254	no		0	0.46	0	0	0	0	0	1.35	0.23	0	0.23	0.05	0	0	0	0	0	0	0	0	0.25	0	0	0	0	0	0	0	0	0	0	0	0	0		0	0.01	0
130	d__Bacteria; p__Verrucomicrobiota; c__Verrucomicrobiae; o__Chthoniobacterales; f__UBA6821; g__UBA6821				abundant	2.32	0.04	10	14.9254	no		0	0	0	0	0	0	0	0	0	0	0	0	0	0	0	0	0	0	0	0	0	0	0	0	0	0	0	2.32	0.04	0	0.01	0	0	0		0	0	0
131	d__Bacteria; p__Pseudomonadota; c__Gammaproteobacteria; o__Burkholderiales; f__Burkholderiaceae_B; g__Hydrogenophaga	taxonomy=Bacteria/Proteobacteria/Gammaproteobacteria/Burkholderiales/Comamonadaceae/Hydrogenophaga_1		2	abundant	1.28	0.0392537	54	80.597	yes	validly published under the ICNP	0.02	0.01	0.01	0.01	0.02	0.01	0.01	0.02	0.01	0.01	0.02	0.01	0.01	0	0.01	0.01	0.01	0.01	0.05	0.32	1.28	0.01	0.06	0.01	0.01	0.01	0.02	0.07	0.01	0	0	0.03	0.02	0.01		0	0.01	0
132	d__Bacteria; p__Bacteroidota; c__Bacteroidia; o__AKYH767-A; f__OLB10; g__CAINEC01				abundant	1.12	0.0391045	12	17.9104	no		0	0	0	0	0	0	0	0	0	0	0	0	0.01	0	0	0	0	0	0	0	0	0	0	0	0	0	0	0.02	1.12	0	0.09	0	0.02	0.05		0	0	0
133	d__Bacteria; p__Campylobacterota; c__Campylobacteria; o__Campylobacterales; f__Sulfurimonadaceae; g__Sulfuricurvum				abundant	1.34	0.0373134	11	16.4179	yes	validly published under the ICNP	0	0	0	0	0	0	0	0	0	0	0	0	0	0	0	0	0	0	0	0	0	0	0	0.01	0	0	0	0	0	0	0	0	0	0.13		0	0	0
134	d__Bacteria; p__Desulfobacterota; c__Desulfobulbia; o__Desulfobulbales; f__Desulfocapsaceae; g__Desulforhopalus				abundant	1.78	0.0371642	4	5.97015	yes	validly published under the ICNP	0	0	0	0	0	0	0	0	0	0	0	0	0	0	0	0	0	0	0	0	0	0	0	0	0	0	0	0	0	0	0	0	0	0		0	0	0
135	d__Bacteria; p__Cyanobacteriota; c__Cyanobacteriia; o__Cyanobacteriales; f__Microcystaceae_B; g__Snowella				abundant	1.95	0.0359701	8	11.9403	yes	validly published under the ICNP	0	0	0	0	0	0	0	0	0	0	0	0	0	0	0	0	0	0	0	0	0	0	0	0.01	0	0	0	0	0.01	0	0	0	0.15	0.21		0	0	0
136	d__Bacteria; p__Patescibacteria; c__Paceibacteria; o__UBA9983_A; f__UBA9973; g__CAITQP01				abundant	1.87	0.0337313	5	7.46269	no		0	0	0	0	0	0	0	0	0	0	0	0	0	0	0	0	0	0	0	0	0	0	0	0	0	0	0	0	0	0	0	0	0	0		0	0	0
137	d__Bacteria; p__Pseudomonadota; c__Gammaproteobacteria; o__Burkholderiales; f__Burkholderiaceae_B; g__Hylemonella				abundant	1.36	0.0331343	28	41.791	yes	validly published under the ICNP	0.02	0.18	0.01	0.02	0	0.01	0	0.12	0.02	0	1.36	0.26	0	0	0.01	0.01	0.01	0.01	0.01	0	0	0	0	0	0.01	0.01	0.01	0	0	0	0	0.01	0.01	0		0.01	0.01	0
138	d__Bacteria; p__Bacteroidota; c__Bacteroidia; o__Cytophagales; f__Cyclobacteriaceae; g__ELB16-189				abundant	1.24	0.0322388	10	14.9254	no		0	0	0	0	0	0	0	0	0	0	0	0	0	0	0	0	0	0	0	0	0	0	0	0	0	0	0.01	0.06	0.01	0	0	0	0.05	0.34		0	0	0
139	d__Bacteria; p__Armatimonadota; c__Fimbriimonadia; o__Fimbriimonadales; f__Fimbriimonadaceae; g__Fimbriimonas	taxonomy=Bacteria/Armatimonadota/Fimbriimonadia_Fimbriimonadales/Fimbriimonadaceae		1	abundant	1.04	0.0322388	12	17.9104	yes	validly published under the ICNP	0	0.18	0	0	0	0	0	1.04	0.02	0	0.16	0.1	0	0	0	0	0	0	0	0	0.23	0	0.1	0	0	0.03	0	0.26	0	0	0	0	0	0		0	0.01	0
140	d__Bacteria; p__Planctomycetota; c__Phycisphaerae; o__WQYP01; f__WQYP01; g__JAMDCX01				abundant	1.59	0.0314925	2	2.98507	no		0	0	0	0	0	0	0	0	0	0	0	0	0	0	0	0	0	0	0	0	0	0	0	0	0	0	0	0	0	0	0	0	0	0		0	0	0
141	d__Bacteria; p__Cyanobacteriota; c__Cyanobacteriia; o__Cyanobacteriales; f__Microcystaceae_B; g__Synechocystis				abundant	1.85	0.0308955	5	7.46269	yes	validly published under the ICNP	0	0	0	0	0	0	0	0	0	0	0	0	0	0	0	0	0	0	0	0	0	0	0	0.01	0	0	0	0	0.01	0	0	0	0	0.19		0	0	0
142	d__Bacteria; p__Pseudomonadota; c__Gammaproteobacteria; o__Burkholderiales; f__Methylophilaceae; g__Methylopumilus_A	taxonomy=Bacteria/Proteobacteria/Gammaproteobacteria/Burkholderiales/Methylophilaceae/Candidatus Methylosemipumilus		2	abundant	1.23	0.0307463	21	31.3433	yes	not validly published, Candidatus	0.04	0	0	0.07	0	0	1.23	0	0.01	0.01	0.04	0.01	0	0	0	0	0.1	0	0	0	0.16	0	0	0	0	0	0.05	0	0.04	0	0	0.01	0	0.03		0	0	0
143	d__Bacteria; p__Pseudomonadota; c__Gammaproteobacteria; o__Burkholderiales; f__Burkholderiaceae_C; g__Algicoccus				abundant	1.57	0.0307463	5	7.46269	yes	validly published under the ICNP	0	0	0	0	0	0	0	0	0	0	0	0	0	0	0	0	0	0	0.16	0	1.57	0	0	0	0	0	0	0	0	0	0	0	0	0		0	0	0
144	d__Bacteria; p__Bacteroidota; c__Bacteroidia; o__Bacteroidales; f__UBA12170; g__UBA12170				abundant	1.22	0.0302985	3	4.47761	no		0	0	0	0	0	0	0	0	0	0	0	0	0	0	0	0	0	0	0	0	0	0	0	0	0	0	0	0	0	0	0	0	0	0		0	0	0
145	d__Bacteria; p__Pseudomonadota; c__Gammaproteobacteria; o__Burkholderiales; f__Burkholderiaceae_A; g__UBA4615				abundant	1.29	0.028806	21	31.3433	no		0.04	0.02	0	0.01	0	0	0	0.18	0.05	0	1.29	0.04	0	0	0	0	0	0.02	0.01	0	0.07	0	0.01	0	0	0	0	0.01	0	0	0.04	0	0.02	0		0.01	0	0
146	d__Bacteria; p__Pseudomonadota; c__Gammaproteobacteria; o__Methylococcales; f__Methylomonadaceae; g__Methyloglobulus				abundant	1.03	0.0258209	5	7.46269	yes	validly published under the ICNP	0	0	0	0	0	0	0	0	0	0	0	0	0	0	0	0	0	0	0	0	0	0	0	0	0	0	0	0	0	0	0	0	0	0		0	0	0.08
147	d__Bacteria; p__Pseudomonadota; c__Gammaproteobacteria; o__Burkholderiales; f__Burkholderiaceae_B; g__Giesbergeria				abundant	1.47	0.0255224	14	20.8955	yes	validly published under the ICNP	0.01	0	0.01	0	0	0	0	0	0	0	0	0	0	0	0	0	0	0	0	0	0	0	0	0	0.01	0	0.01	0.01	0	0	0	0	0.01	0		0	0	0
148	d__Bacteria; p__Verrucomicrobiota; c__Lentisphaeria; o__Victivallales; f__Victivallaceae; g__CAIPAT01				abundant	1.32	0.0241791	6	8.95522	no		0	0	0	0	0	0	0	0	0	0	0	0	0	0	0	0	0	0	0	0	0	0	0	0	0	0	0	0	0	0	0	0	0	0.04		0	0	0
149	d__Bacteria; p__Bacteroidota; c__Bacteroidia; o__Bacteroidales; f__Paludibacteraceae; g__JAFGVL01				abundant	1.19	0.0237313	2	2.98507	no		0	0	0	0	0	0	0	0	0	0	0	0	0	0	0	0	0	0	0	0	0	0	0	0	0	0	0	0	0	0	0	0	0	0		0	0	0
150	d__Bacteria; p__Omnitrophota; c__Koll11; o__2-02-FULL-51-18; f__2-02-FULL-51-18; g__JACQQX01				abundant	1.3	0.0204478	8	11.9403	no		0	0	0	0	0	0	0	0	0	0	0	0	0	0	0	0	0	0	0	0	0	0	0	0	0	0	0	0	0	0	0	0	0	0.01		0	0.01	0.01
151	d__Bacteria; p__Pseudomonadota; c__Gammaproteobacteria; o__Burkholderiales; f__Burkholderiaceae_A; g__RFPW01				abundant	1.19	0.0186567	3	4.47761	no		0.02	1.19	0	0	0	0	0	0	0	0	0	0	0	0	0	0	0	0	0	0	0	0	0	0	0	0	0	0	0	0	0	0	0	0		0	0.04	0
152	d__Bacteria; p__Bacteroidota; c__Bacteroidia; o__Cytophagales; f__Cyclobacteriaceae; g__Algoriphagus				rare	0.93	0.195373	57	85.0746			0.29	0.04	0.24	0.24	0.55	0.08	0.83	0.19	0.42	0.18	0.93	0.41	0.09	0.06	0.5	0.15	0.37	0.26	0.15	0.38	0.56	0.06	0.22	0.01	0.79	0.12	0.12	0.4	0	0.56	0.24	0.02	0.38	0.01		0.09	0.05	0.04
153	d__Bacteria; p__Pseudomonadota; c__Gammaproteobacteria; o__Burkholderiales; f__Burkholderiaceae_C; g__Zwartia	taxonomy=Bacteria/Proteobacteria/Gammaproteobacteria/Burkholderiales/Alcaligenaceae_1/GKS98 freshwater group		3	rare	0.88	0.18403	65	97.0149	yes		0.24	0.1	0.13	0.12	0.21	0.18	0.31	0.01	0.02	0.6	0.01	0.08	0.1	0.1	0.24	0.16	0.23	0.14	0.54	0	0.02	0.04	0.07	0.14	0.07	0.07	0.41	0	0.27	0.84	0.17	0.23	0.07	0.14		0.18	0.16	0.06
154	d__Bacteria; p__Gemmatimonadota; c__Gemmatimonadetes; o__Gemmatimonadales; f__Gemmatimonadaceae; g__Fen-1231				rare	0.91	0.172985	35	52.2388			0.04	0	0.21	0.12	0.2	0.07	0	0	0	0.5	0	0	0.03	0.03	0.05	0	0.01	0	0	0	0	0	0	0	0	0	0	0	0.3	0	0	0	0	0		0.64	0.67	0.69
155	d__Bacteria; p__Actinomycetota; c__Actinomycetia; o__Nanopelagicales; f__UBA5976; g__UBA5976				rare	0.55	0.144478	62	92.5373			0.06	0.05	0.05	0.06	0.2	0.29	0.11	0.02	0.03	0.07	0.12	0.18	0.21	0.26	0.18	0.26	0.21	0.12	0.33	0	0.08	0.44	0.31	0.27	0.19	0.22	0.41	0.19	0.14	0.35	0.5	0.12	0.14	0.09		0.03	0.02	0
156	d__Bacteria; p__Actinomycetota; c__Thermoleophilia; o__Gaiellales; f__F1-60-MAGs149; g__F1-60-MAGs149				rare	0.56	0.118806	57	85.0746			0.12	0	0.2	0.12	0.08	0.08	0	0	0	0.2	0	0	0.09	0.3	0.11	0.25	0.08	0.1	0.07	0	0	0	0.05	0.09	0.04	0.13	0.11	0	0.17	0.07	0.16	0.05	0.02	0.11		0.23	0.2	0.16
157	d__Bacteria; p__Pseudomonadota; c__Alphaproteobacteria; o__Reyranellales; f__Reyranellaceae; g__Reyranella	taxonomy=Bacteria/Proteobacteria/Alphaproteobacteria/Reyranellales_Reyranellaceae/Reyranella		4	rare	0.71	0.108806	48	71.6418	yes		0.02	0	0.04	0.04	0.05	0.01	0	0	0	0.09	0	0	0.09	0.2	0.07	0.09	0.04	0.03	0.05	0	0	0	0	0	0.01	0.02	0.05	0	0.07	0	0	0	0	0.19		0.21	0.31	0.54
158	d__Bacteria; p__Actinomycetota; c__Acidimicrobiia; o__Acidimicrobiales; f__UBA8139; g__F1-20-MAGs160	taxonomy=Bacteria/Actinobacteriota/Acidimicrobiia/Microtrichales/uncultured		6	rare	0.9	0.102388	58	86.5672	no		0.09	0.02	0.07	0.22	0.02	0.09	0.01	0	0	0.4	0	0	0.05	0.15	0.05	0.1	0.02	0.04	0.02	0	0.01	0.07	0.12	0.06	0.02	0.12	0.24	0.32	0.13	0.27	0.25	0.1	0.02	0.05		0.04	0.01	0.01
159	d__Bacteria; p__Bacteroidota; c__Bacteroidia; o__Chitinophagales; f__Chitinophagaceae; g__SXYR01				rare	0.6	0.10194	56	83.5821			0.19	0.38	0.05	0.48	0.03	0.23	0.09	0.16	0.13	0	0.02	0.46	0.03	0.08	0.07	0.32	0.14	0.15	0.01	0	0.01	0.02	0.15	0.04	0.12	0.24	0.18	0.6	0.1	0	0.01	0.26	0.25	0.05		0.04	0.02	0.01
160	d__Bacteria; p__Planctomycetota; c__Planctomycetia; o__Planctomycetales; f__Planctomycetaceae; g__SXXK01				rare	0.73	0.0934328	49	73.1343			0	0	0	0	0.01	0.01	0	0	0	0.19	0	0	0.01	0.01	0.01	0.09	0.05	0.01	0.01	0	0.02	0	0	0.04	0.02	0.02	0.02	0.16	0.29	0	0	0	0.01	0.03		0.26	0.3	0.08
161	d__Bacteria; p__Pseudomonadota; c__Alphaproteobacteria; o__Rhodobacterales; f__Rhodobacteraceae; g__Stagnihabitans				rare	0.83	0.091791	50	74.6269			0.02	0.04	0.01	0.03	0.02	0.05	0.02	0.01	0.02	0.03	0.23	0.37	0.02	0.11	0.36	0.28	0.6	0.2	0.11	0	0	0.02	0	0.01	0.23	0.16	0.34	0	0.12	0.83	0.07	0.04	0	0.28		0	0	0
162	d__Bacteria; p__Pseudomonadota; c__Alphaproteobacteria; o__Micropepsales; f__Micropepsaceae	taxonomy=Bacteria/Proteobacteria/Alphaproteobacteria/Micropepsales_Micropepsaceae/uncultured	SUMMED up at family level ( genera)	1	rare	0.84	0.0897015	50	74.6269	yes		0.02	0	0.01	0.01	0.02	0.02	0	0	0	0.14	0	0	0.01	0.03	0.01	0.01	0	0.04	0	0	0.01	0	0.02	0.08	0	0.04	0.08	0.02	0.4	0	0.02	0	0	0.23		0.23	0.3	0.13
163	d__Bacteria; p__Planctomycetota; c__Planctomycetia; o__Pirellulales; f__UBA1268; g__QWOQ01				rare	0.82	0.0892537	30	44.7761			0.14	0	0.15	0	0.04	0.01	0	0	0	0	0	0	0.12	0.04	0.15	0.01	0.27	0.01	0	0	0	0	0	0	0.08	0.01	0	0	0.08	0	0	0	0	0		0.23	0.15	0.14
164	d__Bacteria; p__Gemmatimonadota; c__Gemmatimonadetes; o__Gemmatimonadales; f__Gemmatimonadaceae; g__Gemmatimonas				rare	0.47	0.0871642	52	77.6119			0.02	0	0	0	0.11	0.39	0.01	0	0	0.02	0	0	0.02	0.28	0.15	0.43	0.23	0.08	0.06	0	0	0.02	0	0.09	0.04	0.2	0.11	0.12	0	0.21	0.01	0.19	0.11	0.04		0.08	0.05	0
165	d__Bacteria; p__Bacteroidota; c__Bacteroidia; o__Sphingobacteriales; f__Sphingobacteriaceae; g__Daejeonella				rare	0.67	0.0844776	61	91.0448			0.03	0.02	0.04	0.04	0.02	0.01	0.02	0.31	0.02	0.06	0.18	0.08	0	0.05	0.09	0.11	0.02	0.04	0	0	0.07	0	0.02	0.06	0.01	0.06	0.01	0.01	0.14	0.1	0.02	0.08	0.07	0.18		0.15	0.26	0.04
166	d__Bacteria; p__Bacteroidota; c__Bacteroidia; o__Flavobacteriales; f__Crocinitomicaceae; g__CAIUKX01				rare	0.37	0.0834328	52	77.6119			0.01	0	0	0.01	0.1	0.07	0	0	0	0.11	0	0	0.05	0.09	0.31	0.13	0.12	0.02	0.04	0	0	0.27	0	0.08	0.01	0.07	0.19	0.02	0.16	0.11	0.32	0.01	0.04	0.34		0.05	0.08	0
167	d__Bacteria; p__Armatimonadota; c__Armatimonadia; o__Armatimonadales; f__Armatimonadaceae; g__CAIRTT01				rare	0.45	0.0822388	54	80.597			0.18	0.08	0.01	0.17	0.09	0.04	0.21	0.07	0.2	0	0.02	0.19	0.05	0.1	0.06	0.05	0.25	0.07	0.05	0	0.07	0	0.16	0	0.05	0.06	0.24	0	0.08	0.44	0.16	0.03	0.04	0.06		0.05	0.01	0.02
168	d__Bacteria; p__Planctomycetota; c__Planctomycetia; o__Pirellulales; f__UBA1268; g__QWOP01				rare	0.57	0.0822388	38	56.7164			0.09	0.19	0.03	0.08	0	0	0	0	0	0	0	0	0.04	0.1	0.1	0.22	0.23	0.27	0	0	0.01	0	0	0	0.27	0.28	0.09	0.01	0.21	0.13	0.15	0.01	0	0.11		0.08	0.07	0.03
169	d__Bacteria; p__Acidobacteriota; c__Vicinamibacteria; o__Vicinamibacterales; f__UBA2999; g__12-FULL-67-14b				rare	0.61	0.0820896	46	68.6567			0.05	0	0.09	0.1	0.03	0.03	0	0	0	0.01	0	0.01	0.04	0.03	0.04	0.05	0.01	0.01	0	0	0	0	0	0	0.01	0	0	0	0.06	0	0	0	0	0.02		0.19	0.33	0.44
170	d__Bacteria; p__Bacteroidota; c__Bacteroidia; o__Flavobacteriales; f__Crocinitomicaceae; g__M0103				rare	0.73	0.0802985	52	77.6119			0.01	0	0	0.01	0.02	0.01	0	0.01	0	0.34	0	0	0.01	0.16	0.06	0.04	0.01	0.11	0.01	0	0	0.39	0.06	0.04	0.03	0.04	0.17	0.03	0.11	0.29	0.12	0.26	0.1	0.18		0.03	0.04	0
171	d__Bacteria; p__Pseudomonadota; c__Gammaproteobacteria; o__Burkholderiales; f__SG8-41; g__PALSA-1004				rare	0.95	0.0776119	41	61.194			0.02	0	0.02	0.01	0.07	0.04	0	0	0	0	0	0	0.01	0.05	0.06	0.06	0.05	0.02	0	0	0	0	0	0.05	0	0	0.18	0	0.42	0	0	0.04	0	0.04		0.1	0.24	0.14
172	d__Bacteria; p__Patescibacteria; c__Paceibacteria; o__UBA9983_A; f__UBA9973; g__UBA9973				rare	0.69	0.0752239	55	82.0896			0	0	0.03	0.01	0.03	0.02	0.02	0.01	0.01	0.04	0.02	0.03	0.02	0.01	0	0	0.01	0.01	0.01	0	0.02	0	0	0.03	0	0	0.03	0	0.08	0	0.02	0.02	0	0.09		0.01	0.03	0.05
173	d__Bacteria; p__Pseudomonadota; c__Alphaproteobacteria; o__Acetobacterales; f__Acetobacteraceae; g__CAMDGX01				rare	0.85	0.0750746	50	74.6269			0.04	0	0.03	0.04	0.06	0.02	0	0	0	0.01	0.01	0.02	0.01	0.03	0.13	0.12	0.11	0.02	0.03	0	0.01	0	0	0.05	0.02	0.04	0.02	0.01	0.03	0	0.05	0	0	0.11		0.28	0.25	0.09
174	d__Bacteria; p__Pseudomonadota; c__Alphaproteobacteria; o__Caulobacterales; f__Caulobacteraceae; g__Phenylobacterium	taxonomy=Bacteria/Proteobacteria/Alphaproteobacteria/Caulobacterales_Caulobacteraceae/Phenylobacterium		1	rare	0.35	0.0743284	57	85.0746	yes		0.2	0.01	0.02	0.02	0.03	0	0.01	0	0	0.15	0	0.02	0.09	0.01	0.12	0.03	0.24	0.27	0.17	0	0.05	0	0	0	0.1	0	0.09	0.06	0.08	0	0.01	0.04	0.05	0.02		0.1	0.04	0.01
175	d__Bacteria; p__Pseudomonadota; c__Gammaproteobacteria; o__Burkholderiales; f__Burkholderiaceae_B; g__Aquabacterium	taxonomy=Bacteria/Proteobacteria/Gammaproteobacteria/Burkholderiales/Comamonadaceae/Aquabacterium	SUMMED up: g__Aquabacterium & g__Aquabacterium_A (2 genera)	1	rare	0.54	0.0729851	45	67.1642	yes		0.01	0	0	0	0.01	0	0.02	0	0	0.18	0	0	0.01	0.01	0.1	0.04	0.1	0.02	0.38	0	0	0	0	0.04	0.08	0	0.08	0.02	0.18	0.08	0.02	0.08	0	0.12		0.01	0	0
176	d__Bacteria; p__Planctomycetota; c__Planctomycetia; o__Isosphaerales; f__Isosphaeraceae; g__QWQI01				rare	0.39	0.0713433	44	65.6716			0	0.01	0	0	0.01	0	0.03	0	0	0.14	0	0	0.01	0.08	0.02	0.06	0.23	0.16	0.3	0	0	0	0	0	0.04	0.11	0.06	0	0.06	0.3	0.01	0.03	0	0.06		0.03	0.02	0
177	d__Bacteria; p__Actinomycetota; c__Actinomycetia; o__Nanopelagicales; f__S36-B12; g__WLND01				rare	0.49	0.0679104	48	71.6418			0.06	0.01	0.03	0.01	0.03	0	0.05	0	0	0.12	0.01	0.08	0.03	0	0.01	0	0.14	0.02	0.46	0	0	0	0	0	0.2	0	0.13	0	0.01	0.03	0	0.1	0	0.01		0.04	0.04	0.02
178	d__Bacteria; p__Pseudomonadota; c__Gammaproteobacteria; o__Burkholderiales; f__SG8-39; g__SZAS-79				rare	0.31	0.0677612	46	68.6567			0.02	0	0.02	0.03	0.06	0.02	0	0	0	0.11	0	0	0.01	0.03	0.04	0.04	0.01	0.01	0	0	0	0	0	0.01	0	0	0.03	0	0.3	0	0	0.03	0	0.03		0.08	0.16	0.07
179	d__Bacteria; p__Bdellovibrionota; c__UBA2361; o__UBA2361; f__OMII01; g__OMII01				rare	0.61	0.0674627	42	62.6866			0.04	0.13	0.03	0.01	0.01	0.02	0	0	0	0	0	0.02	0	0.15	0.05	0.61	0.03	0.04	0.11	0	0	0	0	0.01	0.03	0.42	0	0.09	0.28	0	0.09	0	0	0		0.14	0.15	0.09
180	d__Bacteria; p__Pseudomonadota; c__Alphaproteobacteria; o__Rhizobiales; f__Beijerinckiaceae; g__28-YEA-48				rare	0.36	0.0647761	51	76.1194			0.03	0.01	0.13	0.05	0.09	0.23	0.14	0	0	0.27	0	0	0.02	0.1	0.06	0.09	0.14	0.14	0.05	0	0	0	0.01	0.06	0.01	0.03	0.16	0.07	0.23	0.04	0.04	0.11	0.03	0.06		0.04	0.03	0.01
181	d__Bacteria; p__Actinomycetota; c__Acidimicrobiia; o__Acidimicrobiales; f__Ilumatobacteraceae; g__F1-20-MAGs119				rare	0.23	0.0619403	55	82.0896			0.08	0.04	0.07	0.2	0.04	0.12	0	0	0	0.09	0	0	0.11	0.12	0.08	0.08	0.04	0.15	0.01	0	0.01	0	0.09	0.05	0.04	0.11	0.15	0.12	0.23	0.09	0.22	0.17	0.05	0.09		0.06	0.03	0.02
182	d__Bacteria; p__Pseudomonadota; c__Gammaproteobacteria; o__Steroidobacterales; f__Steroidobacteraceae; g__CAIOHZ01				rare	0.52	0.0613433	31	46.2687			0	0	0	0	0	0	0.01	0	0	0.09	0	0.01	0	0	0.03	0	0.12	0	0	0	0	0	0	0.02	0	0	0.52	0	0.31	0.12	0.03	0.2	0	0.32		0.01	0	0
183	d__Bacteria; p__Pseudomonadota; c__Alphaproteobacteria; o__Rickettsiales; f__Rickettsiaceae; g__GCA-2402195				rare	0.3	0.0597015	57	85.0746			0.04	0.13	0.13	0.17	0.13	0.12	0.03	0.01	0.04	0.01	0.01	0.05	0.04	0.12	0.24	0.1	0.04	0.07	0.16	0	0.01	0	0	0.01	0.07	0.08	0.03	0	0.05	0.04	0.04	0.04	0	0.01		0.07	0.06	0.03
184	d__Bacteria; p__Bdellovibrionota; c__Bacteriovoracia; o__Bacteriovoracales; f__Bacteriovoracaceae; g__UBA4096				rare	0.71	0.058806	44	65.6716			0	0.01	0	0	0.22	0.01	0.01	0.03	0	0.02	0.19	0.09	0.03	0	0.44	0.03	0.03	0	0.5	0	0	0	0.02	0.02	0.06	0	0.09	0.03	0	0.71	0.06	0.14	0.04	0.02		0.01	0.08	0
185	d__Bacteria; p__Planctomycetota; c__Planctomycetia; o__Gemmatales; f__Gemmataceae; g__REEB421				rare	0.5	0.0586567	42	62.6866			0.07	0.11	0.01	0.15	0	0.02	0.09	0.5	0.11	0	0	0	0	0.04	0.01	0.03	0.09	0.01	0.25	0	0	0	0	0.08	0.06	0.07	0.01	0.09	0.19	0.48	0.02	0.06	0.02	0.13		0.02	0	0.01
186	d__Bacteria; p__Pseudomonadota; c__Alphaproteobacteria; o__Acetobacterales; f__Acetobacteraceae; g__SHWF01				rare	0.71	0.0570149	12	17.9104			0.01	0	0.02	0.01	0.02	0	0	0	0	0	0	0	0	0	0	0	0	0	0	0	0	0	0	0	0	0	0	0	0	0	0	0	0	0		0.25	0.56	0.61
187	d__Bacteria; p__Actinomycetota; c__Actinomycetia; o__Actinomycetales; f__Microbacteriaceae; g__MWH-TA3				rare	0.91	0.0559701	32	47.7612			0.02	0.04	0	0.04	0	0	0.16	0.13	0.07	0	0.91	0.13	0	0	0	0	0.05	0	0	0	0.04	0	0.06	0.01	0	0	0.31	0.05	0.05	0	0.11	0.43	0.03	0.04		0.01	0	0
188	d__Bacteria; p__Pseudomonadota; c__Gammaproteobacteria; o__Burkholderiales; f__SG8-41; g__UBA5216				rare	0.46	0.0556716	29	43.2836			0.01	0	0.01	0.03	0.08	0.09	0	0	0	0	0	0	0	0.04	0.04	0.06	0.02	0	0	0	0	0	0	0	0	0	0	0	0.07	0	0	0	0	0		0.09	0.24	0.27
189	d__Bacteria; p__Pseudomonadota; c__Gammaproteobacteria; o__Burkholderiales; f__SG8-41; g__Ga0077527				rare	0.52	0.0555224	49	73.1343			0	0	0.01	0.01	0.01	0	0.02	0	0	0.31	0	0	0	0.01	0.01	0.02	0.02	0.04	0.06	0	0.01	0	0.02	0.1	0	0.01	0.08	0.09	0.11	0	0.01	0.06	0	0.03		0.01	0.03	0.06
190	d__Bacteria; p__Pseudomonadota; c__Alphaproteobacteria; o__Rhizobiales; f__Aestuariivirgaceae; g__Aestuariivirga				rare	0.28	0.0549254	51	76.1194			0.01	0	0	0	0	0	0.01	0	0	0.01	0	0	0.02	0.05	0.12	0.04	0.08	0.01	0.04	0	0.05	0	0	0.01	0.12	0.07	0.09	0.02	0.04	0.16	0.03	0.05	0	0.13		0.02	0.02	0.02
191	d__Bacteria; p__Pseudomonadota; c__Alphaproteobacteria; o__Rickettsiales; f__UBA1997; g__CAILUF01				rare	0.47	0.0537313	42	62.6866			0.01	0.07	0	0.03	0.26	0.12	0.01	0	0.01	0	0	0	0	0.01	0.02	0.2	0.01	0	0.01	0	0.01	0.06	0.05	0.07	0.13	0.04	0.19	0	0.05	0.14	0.22	0.11	0.02	0.23		0.07	0.15	0.01
192	d__Bacteria; p__Pseudomonadota; c__Gammaproteobacteria; o__Burkholderiales; f__SG8-39; g__CAITSH01				rare	0.7	0.0516418	42	62.6866			0.01	0	0.02	0.02	0.03	0.01	0.01	0	0	0.14	0	0	0.01	0.02	0.03	0.02	0.02	0.01	0	0	0	0	0	0	0	0	0.05	0	0.13	0	0	0.08	0	0		0.05	0.07	0.02
193	d__Bacteria; p__Myxococcota; c__Bradymonadia; o__REDH01; f__REDH01; g__CAIWGR01				rare	0.59	0.0507463	42	62.6866			0.01	0.01	0	0.02	0.07	0.02	0.01	0	0	0	0	0.01	0	0.19	0.02	0.09	0.02	0	0	0	0	0	0	0.04	0	0.01	0.59	0	0.06	0	0.17	0	0	0.02		0.03	0.09	0.01
194	d__Bacteria; p__Verrucomicrobiota; c__Verrucomicrobiae; o__Verrucomicrobiales; f__V1-33; g__CAJBME01				rare	0.5	0.050597	36	53.7313			0.01	0	0	0	0.01	0.01	0.04	0	0	0	0	0	0	0	0.05	0.14	0.19	0.03	0.1	0	0.01	0	0	0.02	0.12	0	0	0	0	0.5	0.21	0.03	0	0.04		0.01	0	0
195	d__Bacteria; p__Patescibacteria; c__Paceibacteria; o__UBA9983_A; f__UBA9973; g__UBA8515				rare	0.79	0.049403	40	59.7015			0	0	0	0	0	0.01	0.01	0	0	0.02	0.01	0.01	0	0	0	0	0.01	0	0.01	0	0.01	0	0	0.01	0	0	0.01	0	0.03	0	0.01	0.01	0	0.09		0	0	0
196	d__Bacteria; p__Patescibacteria; c__Paceibacteria; o__UBA9983_A; f__UBA2100; g__UBA10103				rare	0.86	0.0485075	38	56.7164			0.01	0	0.02	0.01	0.08	0.01	0	0	0	0.02	0.01	0.01	0.03	0.01	0	0	0	0	0	0	0	0	0	0.01	0	0	0.01	0	0.01	0	0.01	0	0	0.01		0	0.01	0.1
197	d__Bacteria; p__Pseudomonadota; c__Alphaproteobacteria; o__Rhodospirillales; f__Rhodospirillaceae; g__GCA-2737725				rare	0.34	0.0477612	38	56.7164			0.01	0	0.07	0.12	0.11	0.26	0	0	0	0.03	0	0	0.04	0.08	0.11	0.14	0.03	0.02	0	0	0	0	0	0	0.01	0	0	0	0.02	0	0	0	0.01	0		0.14	0.09	0.08
198	d__Bacteria; p__Pseudomonadota; c__Alphaproteobacteria; o__Acetobacterales; f__Acetobacteraceae; g__UBA6159				rare	0.23	0.0468657	46	68.6567			0.01	0	0.01	0.02	0.05	0.03	0	0	0	0.14	0	0	0.01	0.07	0.02	0.04	0.02	0.02	0	0	0	0	0	0.05	0.01	0	0.02	0	0.02	0	0.01	0	0	0.16		0.04	0.09	0.14
199	d__Bacteria; p__Bacteroidota; c__Bacteroidia; o__Chitinophagales; f__Chitinophagaceae; g__VBAS01				rare	1	0.0461194	13	19.403			0	0	0.07	0.01	0.02	0	0	0	0	0	0	0	0	0	0	0	0	0	0	0	0	0	0	0	0	0	0	0	0	0	0	0	0	0		0.05	0.12	0.51
200	d__Bacteria; p__Verrucomicrobiota; c__Verrucomicrobiae; o__Pedosphaerales; f__SXQI01; g__SXQI01				rare	0.4	0.0444776	21	31.3433			0	0	0.01	0.08	0.09	0.01	0	0	0	0	0	0	0.02	0.03	0.01	0.01	0	0	0	0	0	0	0	0	0	0	0	0	0	0	0	0	0	0		0.03	0.1	0.17
201	d__Bacteria; p__Pseudomonadota; c__Gammaproteobacteria; o__Pseudomonadales; f__Pseudohongiellaceae; g__UBA5078				rare	0.28	0.0438806	40	59.7015			0.04	0	0.01	0.02	0.07	0.16	0.01	0	0	0.14	0	0	0	0.04	0.07	0.11	0.07	0.12	0.02	0	0.01	0	0.04	0.17	0.02	0.04	0.06	0	0	0	0.1	0	0.02	0.04		0.05	0	0
202	d__Bacteria; p__Bdellovibrionota; c__Oligoflexia; o__Oligoflexales; f__RGVZ01; g__RGVZ01				rare	0.88	0.0425373	23	34.3284			0.01	0	0.03	0	0.01	0	0	0.06	0	0	0	0	0	0	0	0.05	0	0	0.01	0	0	0	0	0	0	0	0	0	0.01	0	0	0	0	0.07		0.04	0.05	0.01
203	d__Bacteria; p__Bacteroidota; c__Bacteroidia; o__Chitinophagales; f__Chitinophagaceae; g__OLB11				rare	0.76	0.0419403	26	38.806			0	0.01	0	0	0	0.01	0	0	0	0	0	0	0	0.15	0.03	0.04	0.01	0.01	0	0	0	0	0.03	0.01	0.02	0	0.12	0.01	0.46	0.2	0.25	0.05	0.05	0.13		0	0	0
204	d__Bacteria; p__Dependentiae; c__Babeliae; o__Babeliales; f__CAIQNR01; g__CAMCVM01				rare	0.93	0.0410448	21	31.3433			0	0	0.01	0	0	0	0	0.92	0.01	0	0	0.93	0	0	0.01	0.21	0	0	0	0	0.16	0	0	0	0	0	0	0	0	0	0	0	0	0		0	0.01	0
205	d__Bacteria; p__Acidobacteriota; c__Terriglobia; o__Bryobacterales; f__Bryobacteraceae; g__BOG-234				rare	0.44	0.0404478	37	55.2239			0.01	0	0	0.01	0.04	0.01	0	0	0	0.01	0	0	0.01	0.1	0.01	0.17	0.02	0.01	0	0	0	0	0	0	0	0	0.01	0	0.11	0	0	0	0	0.08		0.1	0.04	0.01
206	d__Bacteria; p__Planctomycetota; c__Planctomycetia; o__Gemmatales; f__Gemmataceae; g__UBA6894				rare	0.26	0.04	39	58.209			0.01	0	0	0.01	0	0.02	0	0.03	0.15	0	0.09	0.06	0	0.16	0.06	0.14	0.26	0.15	0.04	0	0.19	0	0	0	0.02	0.26	0	0	0	0	0.12	0	0	0.02		0.01	0.01	0
207	d__Bacteria; p__Patescibacteria; c__Paceibacteria; o__UBA9983_A; f__UBA2103; g__C7867-001				rare	0.38	0.0383582	47	70.1493			0	0	0.01	0.01	0.02	0.01	0.01	0	0	0.05	0.01	0.02	0.01	0.01	0	0	0	0.01	0.01	0	0	0	0	0.02	0	0	0.03	0	0.03	0	0.01	0.03	0	0.03		0.01	0.01	0
208	d__Bacteria; p__Pseudomonadota; c__Gammaproteobacteria; o__Ga0077536; f__Ga0077536; g__Ga0077536				rare	0.45	0.0380597	47	70.1493			0	0.01	0.01	0.02	0.03	0.05	0	0	0.02	0.37	0	0	0.02	0.08	0.01	0.03	0.01	0.03	0	0	0.01	0	0.04	0.03	0	0.06	0	0.01	0.05	0	0.03	0	0.01	0.1		0.05	0.02	0.03
209	d__Bacteria; p__Pseudomonadota; c__Alphaproteobacteria; o__SHVZ01; f__SHVZ01; g__SHVZ01				rare	0.47	0.0379104	21	31.3433			0	0	0	0	0	0	0	0	0	0	0	0	0.01	0	0.01	0	0	0	0	0	0	0	0	0	0	0	0	0	0.03	0	0	0	0	0		0.05	0.1	0.26
210	d__Bacteria; p__Pseudomonadota; c__Alphaproteobacteria; o__Rhizobiales; f__Xanthobacteraceae; g__Z2-YC6860				rare	0.46	0.0374627	14	20.8955			0	0	0.01	0	0	0	0	0	0	0	0	0	0	0	0	0	0	0	0	0	0	0	0	0	0	0	0	0	0	0	0	0	0	0		0.02	0.05	0.46
211	d__Bacteria; p__Pseudomonadota; c__Gammaproteobacteria; o__Burkholderiales; f__SG8-39; g__2-02-FULL-62-17				rare	0.36	0.0373134	37	55.2239			0.01	0	0.03	0.03	0.14	0.05	0	0	0	0.01	0	0	0.01	0.01	0.03	0.01	0.04	0.01	0	0	0	0	0	0	0	0	0.05	0	0.12	0	0	0	0	0		0.05	0.09	0.11
212	d__Bacteria; p__Bacteroidota; c__Bacteroidia; o__Chitinophagales; f__UBA10324; g__UBA10324				rare	0.77	0.0371642	12	17.9104			0	0	0	0	0	0	0	0	0	0	0	0	0	0	0	0	0	0	0	0	0	0	0	0	0	0	0	0	0.02	0	0	0	0	0		0	0	0
213	d__Bacteria; p__Pseudomonadota; c__Alphaproteobacteria; o__Rhizobiales; f__Beijerinckiaceae; g__CAIUPE01				rare	0.28	0.0364179	50	74.6269			0.02	0	0.03	0.03	0.02	0.09	0.28	0	0	0.08	0	0.01	0.01	0.11	0.06	0.1	0.03	0.08	0.13	0	0	0	0	0.03	0.04	0.09	0.05	0	0.08	0.07	0.01	0.01	0.05	0.03		0.02	0.02	0.01
214	d__Bacteria; p__Verrucomicrobiota; c__Verrucomicrobiae; o__Verrucomicrobiales; f__Akkermansiaceae; g__UBA956				rare	0.81	0.0364179	27	40.2985			0	0.35	0	0	0	0	0.01	0.01	0.81	0.02	0	0.24	0	0	0	0.01	0.16	0.03	0.01	0	0.17	0	0	0	0	0	0	0.11	0	0	0.01	0.05	0	0		0	0.01	0
215	d__Bacteria; p__Myxococcota; c__Polyangia; o__Polyangiales; f__Polyangiaceae; g__SYFR01				rare	0.88	0.0358209	21	31.3433			0.05	0	0	0.01	0.01	0	0	0	0	0	0	0.02	0	0	0.02	0.04	0	0	0	0	0	0	0	0	0	0.02	0	0	0.04	0	0	0	0	0		0.09	0	0
216	d__Bacteria; p__Pseudomonadota; c__Gammaproteobacteria; o__Burkholderiales; f__Burkholderiaceae_B; g__CAISIP01				rare	0.19	0.0356716	38	56.7164			0	0	0	0	0.01	0	0	0	0	0.1	0	0	0	0	0.04	0	0.02	0	0	0	0	0	0	0	0.01	0	0	0	0.17	0	0	0.02	0	0.03		0.05	0.06	0.05
217	d__Bacteria; p__Pseudomonadota; c__Gammaproteobacteria; o__Burkholderiales; f__Nitrosomonadaceae; g__BJGV01				rare	0.88	0.0353731	18	26.8657			0	0	0	0	0.01	0.02	0	0	0	0	0	0	0.01	0	0	0.02	0	0	0	0	0	0	0	0	0	0	0	0	0	0	0	0	0	0		0.02	0.01	0
218	d__Bacteria; p__Actinomycetota; c__Acidimicrobiia; o__IMCC26256; f__IMCC26256; g__IMCC26256				rare	0.79	0.0347761	25	37.3134			0.04	0	0.02	0.05	0.01	0.01	0	0	0	0	0	0	0	0	0	0	0	0	0	0	0	0	0	0	0	0	0.01	0	0.2	0	0	0	0	0		0.02	0.01	0.02
219	d__Bacteria; p__Pseudomonadota; c__Alphaproteobacteria; o__Acetobacterales; f__Acetobacteraceae; g__Roseomonas_B				rare	0.23	0.0338806	32	47.7612			0.08	0.19	0.03	0.11	0	0.13	0	0.01	0	0	0	0	0	0.06	0	0.1	0.03	0.18	0	0	0.03	0	0.23	0.01	0	0.13	0	0.16	0	0	0.03	0.05	0.17	0.03		0.03	0.04	0.01
220	d__Bacteria; p__Bacteroidota; c__Bacteroidia; o__Flavobacteriales; f__UA16; g__UBA4660				rare	0.62	0.0338806	34	50.7463			0.22	0.04	0.01	0.05	0.01	0.01	0.01	0	0	0	0	0.07	0	0.03	0	0	0.16	0	0	0	0.2	0	0.03	0	0.03	0.01	0.01	0.62	0.01	0	0.01	0	0.31	0		0.03	0.01	0
221	d__Bacteria; p__Verrucomicrobiota; c__Verrucomicrobiae; o__Pedosphaerales; f__SIBH01; g__SIBH01				rare	0.55	0.0335821	16	23.8806			0.01	0	0	0.02	0	0	0	0	0	0	0	0	0	0.01	0	0.01	0	0	0	0	0	0	0	0	0	0	0	0	0	0	0	0	0	0		0.46	0.11	0.05
222	d__Bacteria; p__Chloroflexota; c__Chloroflexia; o__Chloroflexales; f__Roseiflexaceae; g__UBA965				rare	0.27	0.0329851	35	52.2388			0.02	0	0	0	0	0	0.01	0	0.04	0.15	0	0.01	0	0	0	0	0.09	0.03	0.25	0	0.01	0	0.02	0.01	0.01	0.01	0.14	0.17	0.03	0	0.01	0.1	0	0		0.01	0	0
223	d__Bacteria; p__Actinomycetota; c__Actinomycetia; o__Nanopelagicales; f__UBA12327; g__AcAMD-2				rare	0.21	0.0325373	34	50.7463			0	0.01	0	0.01	0	0.02	0	0	0	0.02	0	0	0.08	0.01	0	0.04	0	0.09	0	0	0	0	0	0.01	0	0.02	0.05	0	0.19	0	0.13	0	0	0.09		0.01	0.03	0
224	d__Bacteria; p__Bacteroidota; c__Bacteroidia; o__Bacteroidales; f__Prolixibacteraceae; g__CAINVV01				rare	0.96	0.0322388	8	11.9403			0	0	0	0	0	0	0	0	0	0	0	0	0	0	0	0	0	0	0	0	0	0	0	0	0	0	0	0	0	0	0	0	0	0.02		0	0	0
225	d__Bacteria; p__Bacteroidota; c__Bacteroidia; o__Flavobacteriales; f__Schleiferiaceae; g__CAMDTE01				rare	0.46	0.0320896	28	41.791			0	0	0	0	0.07	0.22	0	0	0	0	0.02	0.06	0	0	0.11	0.01	0	0.01	0.02	0	0.11	0.1	0.12	0.04	0.02	0.14	0	0	0	0.13	0.03	0	0.46	0		0	0	0
226	d__Bacteria; p__Pseudomonadota; c__Alphaproteobacteria; o__Rickettsiales; f__UBA1997; g__RFXY01				rare	0.29	0.0316418	42	62.6866			0.01	0.29	0	0.05	0.01	0.01	0.04	0.06	0.04	0.01	0.11	0.06	0	0.01	0.01	0.06	0.05	0.02	0	0	0.06	0	0.23	0.02	0	0.02	0	0	0.05	0	0.03	0	0.04	0		0	0.04	0.01
227	d__Bacteria; p__Actinomycetota; c__Acidimicrobiia; o__Acidimicrobiales; f__Microtrichaceae; g__IMCC26207				rare	0.18	0.0314925	36	53.7313			0.04	0	0	0.01	0	0	0.01	0	0	0.03	0	0	0.03	0.01	0.01	0.02	0.01	0	0.08	0	0	0	0	0	0.01	0.01	0.01	0	0	0	0	0	0	0		0.06	0.03	0
228	d__Bacteria; p__Pseudomonadota; c__Alphaproteobacteria; o__Caulobacterales; f__Caulobacteraceae; g__Brevundimonas	taxonomy=Bacteria/Proteobacteria/Alphaproteobacteria/Caulobacterales_Caulobacteraceae/Brevundimonas_1		1	rare	0.19	0.0313433	48	71.6418	yes		0.01	0.19	0	0.01	0	0	0.03	0	0.03	0.01	0.02	0.02	0.02	0	0	0	0.02	0.05	0.19	0	0.14	0	0.01	0.01	0.09	0.01	0.03	0.16	0.02	0	0	0.06	0.02	0.03		0	0.02	0.01
229	d__Bacteria; p__Bdellovibrionota; c__Oligoflexia; o__Oligoflexales; f__RGVZ01; g__CAMDKS01				rare	0.57	0.0308955	27	40.2985			0	0.02	0	0	0	0	0	0	0	0	0	0	0	0	0	0.01	0	0.05	0	0	0	0	0.03	0.02	0	0.02	0.01	0	0.06	0	0	0	0	0.57		0.02	0.06	0
230	d__Bacteria; p__Omnitrophota; c__Omnitrophia; o__Omnitrophales; f__Aquincolibacteriaceae; g__Aquincolibacterium				rare	0.4	0.0307463	38	56.7164			0	0	0	0	0	0	0.01	0.01	0	0.02	0	0.01	0	0	0	0	0	0	0.01	0	0.01	0	0	0.02	0	0	0	0	0.02	0	0.01	0	0	0.36		0	0.01	0.01
231	d__Bacteria; p__Bacteroidota; c__Bacteroidia; o__Sphingobacteriales; f__Sphingobacteriaceae; g__JAIPAN01				rare	0.46	0.030597	25	37.3134			0	0.01	0.37	0.09	0.01	0.01	0.07	0.02	0	0	0	0	0.01	0.04	0	0.02	0.03	0	0	0	0	0.46	0	0	0.02	0	0.01	0.07	0.01	0.33	0	0.07	0.27	0.03		0	0	0.01
232	d__Bacteria; p__Chloroflexota; c__Dehalococcoidia; o__UBA2979; f__UBA2979; g__RH-chloro-G1				rare	0.32	0.0304478	18	26.8657			0	0	0	0	0	0	0	0	0	0	0	0	0	0	0	0	0	0	0	0	0	0	0	0	0	0	0	0	0.07	0	0	0	0	0		0.08	0.28	0.23
233	d__Bacteria; p__Pseudomonadota; c__Alphaproteobacteria; o__CAIVPW01; f__CAIVPW01; g__CAIVPW01				rare	0.36	0.0302985	18	26.8657			0	0	0	0	0.01	0.01	0	0	0	0	0	0	0	0	0	0.01	0	0	0	0	0	0	0	0	0	0	0	0	0.01	0	0	0	0	0		0.04	0.26	0.36
234	d__Bacteria; p__Chloroflexota; c__Dehalococcoidia; o__UBA2979; f__UBA2979; g__SHYQ01				rare	0.27	0.03	21	31.3433			0	0	0	0	0	0	0	0	0	0.01	0	0	0	0	0	0	0	0	0	0	0	0	0	0	0	0	0	0	0.05	0	0	0	0	0		0.09	0.27	0.19
235	d__Bacteria; p__Chloroflexota; c__Dehalococcoidia; o__UBA2979; f__UBA2979; g__SURF-43				rare	0.24	0.03	17	25.3731			0	0	0	0	0	0	0	0	0	0.08	0	0	0	0	0	0	0	0	0	0	0	0	0	0	0	0	0	0	0	0	0	0	0	0		0.07	0.24	0.12
236	d__Bacteria; p__Chloroflexota; c__Dehalococcoidia; o__UBA1151; f__SHXW01; g__SHXW01				rare	0.64	0.0289552	4	5.97015			0	0	0	0	0	0	0	0	0	0	0	0	0	0	0	0	0	0	0	0	0	0	0	0	0	0	0	0	0	0	0	0	0	0		0	0	0.54
237	d__Bacteria; p__Bacteroidota; c__Kapabacteria; o__Kapabacteriales; f__Kapabacteriaceae; g__UBA10438				rare	0.35	0.028209	25	37.3134			0.04	0	0	0	0	0	0	0	0	0	0	0	0	0.07	0.03	0.35	0.02	0	0	0	0.07	0	0	0	0.01	0.04	0	0.26	0	0	0.04	0	0.03	0.01		0.17	0.13	0
238	d__Bacteria; p__Pseudomonadota; c__Alphaproteobacteria; o__Sphingomonadales; f__Sphingomonadaceae; g__Novosphingobium	taxonomy=Bacteria/Proteobacteria/Alphaproteobacteria/Sphingomonadales_Sphingomonadaceae/Novosphingobium_2		1	rare	0.4	0.0280597	49	73.1343	yes		0.02	0.14	0.01	0.02	0.01	0.02	0	0.01	0.01	0.01	0.01	0.01	0	0.08	0	0.03	0.01	0.03	0	0	0	0	0	0.01	0	0.03	0	0.01	0.08	0	0.03	0.01	0	0.03		0.06	0.04	0.04
239	d__Bacteria; p__Pseudomonadota; c__Alphaproteobacteria; o__Rickettsiales; f__Deianiraeaceae; g__CAJQOT01				rare	0.23	0.0279104	45	67.1642			0.03	0.06	0.05	0.06	0.01	0.06	0.04	0.06	0	0.1	0.01	0.05	0.02	0.03	0.05	0.01	0.07	0.01	0.01	0	0.03	0.01	0	0.01	0.11	0.05	0.06	0	0.03	0	0.02	0.02	0	0.02		0.01	0	0
240	d__Bacteria; p__Pseudomonadota; c__Gammaproteobacteria; o__Legionellales; f__Legionellaceae; g__GCA-2786165				rare	0.42	0.0274627	25	37.3134			0	0.04	0.03	0.02	0	0.02	0	0	0	0.06	0	0	0	0	0.08	0	0	0	0	0	0	0	0	0	0.01	0	0	0	0	0	0	0	0	0		0	0.02	0
241	d__Bacteria; p__Desulfobacterota_F; c__Desulfuromonadia; o__Geobacterales; f__Pseudopelobacteraceae; g__JACRCG01				rare	0.58	0.0274627	10	14.9254			0	0	0	0	0	0	0	0	0	0	0	0	0	0	0	0	0	0	0	0	0	0	0	0	0	0	0	0	0	0	0	0	0	0		0	0	0
242	d__Bacteria; p__Bacteroidota; c__Bacteroidia; o__Flavobacteriales; f__PHOS-HE28; g__PHOS-HE28				rare	0.51	0.0273134	14	20.8955			0	0	0	0	0	0	0	0	0	0	0	0	0	0.01	0	0.13	0.02	0.04	0	0	0.01	0	0	0	0	0	0	0.41	0	0	0.51	0	0	0		0	0	0
243	d__Bacteria; p__Gemmatimonadota; c__Gemmatimonadetes; o__Gemmatimonadales; f__Gemmatimonadaceae; g__PNKF01				rare	0.62	0.0271642	17	25.3731			0	0	0	0	0.03	0	0	0	0	0	0	0	0	0.01	0	0	0	0	0	0	0	0	0.54	0	0	0.01	0	0.04	0.01	0	0	0	0	0		0	0	0
244	d__Bacteria; p__Pseudomonadota; c__Alphaproteobacteria; o__Rhodospirillales; f__Rhodospirillaceae; g__SHVO01				rare	0.19	0.0270149	32	47.7612			0	0	0	0	0.01	0.01	0	0	0	0.04	0	0	0	0	0	0.01	0	0	0	0	0	0	0	0.01	0	0	0	0	0.18	0	0	0	0	0.02		0.06	0.1	0.09
245	d__Bacteria; p__Pseudomonadota; c__Gammaproteobacteria; o__Burkholderiales; f__Thiobacillaceae; g__QYQG01				rare	0.89	0.0267164	6	8.95522			0	0	0	0	0	0	0	0	0	0	0	0	0	0	0	0	0	0	0	0	0	0	0	0.04	0	0	0	0	0	0	0	0	0	0		0	0	0
246	d__Bacteria; p__Chlamydiota; c__Chlamydiia; o__Chlamydiales; f__Rhabdochlamydiaceae; g__VGMB01				rare	0.25	0.0256716	32	47.7612			0.01	0.01	0	0	0.02	0	0.02	0	0	0.03	0	0	0.01	0	0.03	0	0	0	0	0	0	0	0	0	0	0	0.01	0.01	0.02	0	0	0	0	0		0.05	0.04	0.02
247	d__Bacteria; p__Planctomycetota; c__UBA11346; o__UBA11346; f__UBA11346; g__UBA11346				rare	0.93	0.0250746	13	19.403			0	0	0	0	0	0	0	0	0	0	0	0	0	0	0	0	0	0	0	0	0	0	0	0	0	0	0	0	0	0	0	0	0	0.01		0.02	0.04	0
248	d__Bacteria; p__Myxococcota; c__Polyangia; o__Polyangiales; f__Polyangiaceae; g__CAIQDA01				rare	0.2	0.0247761	46	68.6567			0.02	0.01	0	0.01	0.05	0.03	0	0.12	0	0	0	0.03	0.01	0.07	0.02	0.02	0	0.01	0	0	0	0	0.02	0.01	0	0.03	0.02	0.02	0.02	0	0.01	0	0.01	0.03		0.01	0.03	0.05
249	d__Bacteria; p__Acidobacteriota; c__Terriglobia; o__Bryobacterales; f__Bryobacteraceae; g__Palsa-187				rare	0.37	0.0247761	16	23.8806			0	0	0	0	0	0	0	0	0	0	0	0	0	0	0	0	0	0	0	0	0	0	0	0	0	0	0	0	0.11	0	0	0	0	0		0.02	0.15	0.37
250	d__Bacteria; p__Pseudomonadota; c__Alphaproteobacteria; o__Rickettsiales; f__Rickettsiaceae; g__Megaira				rare	0.35	0.0244776	49	73.1343			0.02	0.07	0.07	0.06	0.05	0.04	0.07	0.04	0.03	0	0	0.01	0.03	0.07	0.03	0.03	0.01	0.01	0.35	0	0.01	0	0	0	0.02	0.01	0.01	0.02	0.04	0	0.01	0.02	0	0.01		0.02	0.01	0
251	d__Bacteria; p__Pseudomonadota; c__Gammaproteobacteria; o__Pseudomonadales; f__UBA5518; g__UBA5518				rare	0.32	0.0243284	37	55.2239			0	0	0	0	0.02	0	0	0	0	0.09	0	0	0	0.01	0.01	0.01	0	0.01	0	0	0	0	0	0.01	0	0	0.06	0	0	0	0	0.04	0	0.06		0.03	0.01	0.03
252	d__Bacteria; p__Pseudomonadota; c__Alphaproteobacteria; o__Acetobacterales; f__Acetobacteraceae; g__Falsiroseomonas				rare	0.83	0.0238806	11	16.4179			0	0.01	0	0	0	0	0	0.39	0.09	0	0	0	0	0	0	0	0	0	0	0.05	0.14	0	0	0	0	0	0.01	0.83	0	0	0	0	0.01	0		0	0	0
253	d__Bacteria; p__Bacteroidota; c__UBA10030; o__UBA10030; f__UBA8401; g__UBA8401				rare	0.92	0.0238806	8	11.9403			0	0	0	0	0	0	0	0	0	0	0	0	0	0	0	0	0	0	0	0	0	0	0	0.01	0	0	0	0	0	0	0	0	0	0.01		0	0	0
254	d__Bacteria; p__Verrucomicrobiota; c__Verrucomicrobiae; o__Opitutales; f__Opitutaceae; g__Rariglobus				rare	0.26	0.0237313	31	46.2687			0	0	0	0	0	0	0.01	0	0	0	0	0	0.03	0.02	0.12	0.04	0.01	0.15	0.04	0	0	0	0	0.02	0.17	0	0.01	0	0	0	0	0	0	0.02		0	0	0
255	d__Bacteria; p__Pseudomonadota; c__Gammaproteobacteria; o__Pseudomonadales; f__Pseudohongiellaceae; g__UBA9145				rare	0.24	0.0234328	16	23.8806			0	0	0	0.03	0.04	0.01	0	0	0	0	0	0	0	0	0.01	0	0	0	0	0	0	0	0	0	0	0	0	0	0	0	0	0	0	0		0.24	0.13	0.08
256	d__Bacteria; p__Pseudomonadota; c__Gammaproteobacteria; o__Burkholderiales; f__Gallionellaceae; g__Gallionella				rare	1	0.0232836	13	19.403			0	0	0	0	0	0	0	0	0	0.02	0	0	0	0	0	0	0	0	0	0	0	0	0	0	0	0	0	0	0.02	0	0	0	0	0.11		0	0	0
257	d__Bacteria; p__Krumholzibacteriota; c__Krumholzibacteria; o__LZORAL124-64-63; f__LZORAL124-64-63; g__CAINDZ01				rare	0.83	0.0232836	5	7.46269			0	0	0	0	0	0	0	0	0	0	0	0	0	0	0	0	0	0	0	0	0	0	0	0	0	0	0	0	0	0	0	0	0	0		0	0	0
258	d__Bacteria; p__Pseudomonadota; c__Alphaproteobacteria; o__Caulobacterales; f__Hyphomonadaceae; g__UBA7672				rare	0.17	0.0229851	41	61.194			0	0	0	0.03	0	0	0.04	0.02	0.1	0.03	0.07	0.06	0	0	0	0.01	0.02	0.02	0.04	0	0.02	0	0	0.01	0	0	0.02	0	0.11	0	0.01	0	0.03	0.17		0.01	0.03	0
259	d__Bacteria; p__Pseudomonadota; c__Alphaproteobacteria; o__Paracaedibacterales; f__CAITNM01; g__CAITNM01				rare	0.15	0.0229851	44	65.6716			0.02	0.02	0.12	0.02	0.07	0.02	0.05	0	0	0	0	0	0.01	0.02	0.05	0.05	0.02	0.02	0.04	0	0	0	0	0.01	0.04	0	0.01	0	0.13	0	0.01	0	0	0.02		0.02	0.02	0.01
260	d__Bacteria; p__Verrucomicrobiota; c__Verrucomicrobiae; o__Chthoniobacterales; f__Terrimicrobiaceae; g__CAMASH01				rare	0.33	0.0228358	13	19.403			0.11	0	0	0	0	0	0	0	0	0	0	0	0	0	0	0	0	0	0.12	0	0	0	0	0	0	0	0	0	0	0	0	0	0	0		0.33	0.17	0
261	d__Bacteria; p__Bdellovibrionota; c__FAC87; o__UBA2466; f__UBA2466; g__UBA2466				rare	0.66	0.0226866	11	16.4179			0.01	0	0	0	0	0	0	0	0	0	0	0	0	0	0.01	0	0	0	0	0	0	0	0	0	0	0	0	0	0	0	0	0	0	0		0.08	0.06	0.16
262	d__Bacteria; p__Pseudomonadota; c__Alphaproteobacteria; o__Caulobacterales; f__Hyphomonadaceae; g__Hyphomonas				rare	0.51	0.0226866	14	20.8955			0	0.1	0	0.01	0	0	0	0.09	0.16	0	0.42	0.1	0	0	0	0	0	0	0.01	0	0.51	0	0	0	0	0	0	0.01	0	0	0	0	0	0		0	0	0
263	d__Bacteria; p__Pseudomonadota; c__Alphaproteobacteria; o__Holosporales; f__Holosporaceae; g__VGCF01				rare	0.39	0.0225373	43	64.1791			0.01	0.05	0.02	0.01	0	0.04	0.09	0	0.08	0	0	0.39	0.02	0.02	0.01	0.02	0.03	0.05	0.12	0	0.01	0	0	0.02	0.02	0.01	0	0.01	0.01	0	0.01	0.02	0	0.05		0.02	0.02	0
264	d__Bacteria; p__Verrucomicrobiota; c__Verrucomicrobiae; o__Opitutales; f__Opitutaceae; g__CAIYFD01				rare	0.91	0.0225373	9	13.4328			0	0	0	0	0.03	0	0	0	0	0	0	0	0	0	0	0	0	0	0	0	0	0	0	0	0	0	0.08	0	0.1	0	0	0	0	0		0	0	0
265	d__Bacteria; p__Margulisbacteria; c__Marinamargulisbacteria; o__SXXA01_A; f__SICP01; g__SICP01				rare	0.94	0.0225373	11	16.4179			0	0	0	0	0.01	0	0.01	0	0	0	0	0.01	0	0	0	0	0	0	0.01	0	0	0	0	0	0	0	0	0	0	0	0	0	0	0		0	0	0
266	d__Bacteria; p__Pseudomonadota; c__Gammaproteobacteria; o__Pseudomonadales; f__Pseudomonadaceae; g__Pseudomonas_E				rare	0.37	0.0223881	23	34.3284			0	0	0	0	0	0.01	0.2	0	0	0	0	0.04	0	0	0	0	0	0	0.01	0	0.11	0	0.02	0.02	0	0.01	0	0	0.01	0	0	0	0	0.02		0	0	0
267	d__Bacteria; p__Chlamydiota; c__Chlamydiia; o__Chlamydiales; f__CAMCWV01; g__CAMCWV01				rare	0.61	0.0223881	16	23.8806			0	0	0	0.01	0	0	0	0	0	0.26	0	0.01	0	0	0	0	0	0	0	0	0	0	0	0	0	0	0	0	0	0	0	0	0	0		0.01	0.01	0
268	d__Bacteria; p__Pseudomonadota; c__Alphaproteobacteria; o__Sphingomonadales; f__Sphingomonadaceae; g__Sphingomonas	taxonomy=Bacteria/Proteobacteria/Alphaproteobacteria/Sphingomonadales_Sphingomonadaceae/Sphingomonas_5		1	rare	0.13	0.0222388	46	68.6567	yes		0.01	0.01	0	0.01	0.01	0	0.01	0	0.05	0.05	0.01	0.01	0	0.01	0	0	0.01	0	0.1	0	0	0.01	0.03	0	0.01	0.01	0.04	0.03	0.07	0	0.01	0.01	0.02	0.04		0.03	0.01	0.01
269	d__Bacteria; p__Verrucomicrobiota; c__Verrucomicrobiae; o__Pedosphaerales; f__UBA9464; g__CAIVQB01				rare	0.39	0.0222388	27	40.2985			0.02	0	0	0	0.05	0	0	0	0	0	0	0	0.03	0.01	0.03	0.01	0.03	0	0	0	0	0	0	0	0.07	0	0.05	0	0.05	0	0	0	0	0		0.04	0.03	0
270	d__Bacteria; p__Chlamydiota; c__Chlamydiia; o__2-12-FULL-49-11; f__2-12-FULL-49-11; g__JAJACQ01				rare	0.54	0.0222388	20	29.8507			0	0	0	0	0	0	0	0	0	0	0	0.07	0	0	0.01	0.02	0.01	0	0.09	0	0.01	0	0	0	0.02	0	0	0	0	0	0	0	0	0		0.03	0.02	0
271	d__Bacteria; p__Verrucomicrobiota; c__Verrucomicrobiae; o__Pedosphaerales; f__BJHT01; g__BJHT01				rare	0.52	0.0219403	9	13.4328			0	0	0	0	0	0	0	0	0	0	0	0	0	0	0	0.01	0	0	0	0	0	0	0	0	0	0	0	0	0	0	0	0	0	0		0.15	0.52	0
272	d__Bacteria; p__Pseudomonadota; c__Gammaproteobacteria; o__Burkholderiales; f__Burkholderiaceae_B; g__PBB1				rare	0.19	0.021791	25	37.3134			0.16	0.14	0.04	0.03	0.01	0.01	0.19	0	0	0.02	0.08	0.09	0	0	0	0	0.08	0.03	0	0	0	0.02	0	0	0	0	0.13	0.08	0	0.08	0	0.04	0.02	0.01		0.01	0	0
273	d__Bacteria; p__Pseudomonadota; c__Gammaproteobacteria; o__Burkholderiales; f__SG8-39; g__CAIYPG01				rare	0.15	0.021791	37	55.2239			0	0	0	0	0	0	0	0	0	0.05	0	0	0	0	0	0.01	0	0.01	0	0	0	0	0	0.04	0	0.01	0.01	0	0.07	0	0	0.01	0	0.02		0.03	0.11	0.05
274	d__Bacteria; p__Desulfobacterota_F; c__Desulfuromonadia; o__Geobacterales; f__Pseudopelobacteraceae; g__Trichlorobacter				rare	0.63	0.0216418	4	5.97015			0	0	0	0	0	0	0	0	0	0	0	0	0	0	0	0	0	0	0	0	0	0	0	0	0	0	0	0	0	0	0	0	0	0		0	0	0
275	d__Bacteria; p__Bacteroidota; c__Bacteroidia; o__Flavobacteriales; f__GCA-002722245; g__JAHEZL01				rare	0.54	0.021194	17	25.3731			0	0	0	0	0	0	0	0	0	0	0	0	0	0	0	0	0.54	0	0.05	0	0	0	0	0	0.08	0	0	0	0	0	0	0.02	0	0		0.05	0.06	0
276	d__Bacteria; p__Actinomycetota; c__Acidimicrobiia; o__Acidimicrobiales; f__JACDCH01; g__VFJN01				rare	0.21	0.0210448	20	29.8507			0.01	0	0.01	0.01	0	0	0	0	0	0	0	0	0	0	0	0	0	0	0	0	0	0	0	0	0	0	0	0	0	0	0	0	0	0		0.09	0.16	0.17
277	d__Bacteria; p__Verrucomicrobiota; c__Verrucomicrobiae; o__Pedosphaerales; f__UBA11358; g__JABFSR01				rare	0.33	0.0208955	20	29.8507			0	0	0	0	0	0	0	0	0	0.27	0	0	0	0	0	0.01	0.01	0	0	0	0	0	0	0	0	0	0.05	0	0.04	0	0	0	0	0.11		0	0	0
278	d__Bacteria; p__Patescibacteria; c__Saccharimonadia; o__CAILAD01; f__BJGX01; g__SICB01				rare	0.34	0.0208955	22	32.8358			0	0	0.11	0.01	0	0	0	0	0	0	0	0	0.01	0	0	0	0	0	0	0	0	0	0	0	0	0	0	0	0.02	0	0	0	0	0		0.01	0.01	0.1
279	d__Bacteria; p__Patescibacteria; c__Paceibacteria; o__UBA9983_A; f__GWA1-40-21; g__CAIJXO01				rare	0.34	0.0208955	32	47.7612			0	0	0	0	0	0	0	0	0	0.01	0	0	0	0	0	0	0	0	0.01	0	0.02	0	0	0.03	0	0	0	0	0.02	0	0.02	0	0	0.12		0	0.01	0
280	d__Bacteria; p__Verrucomicrobiota; c__Lentisphaeria; o__Victivallales; f__GWF2-50-93; g__GWF2-50-93				rare	0.63	0.0207463	8	11.9403			0	0	0	0	0	0	0	0	0	0	0	0	0	0	0	0	0	0	0	0	0	0	0	0	0	0	0	0	0	0	0	0	0	0.03		0	0	0
281	d__Bacteria; p__Bacteroidota; c__Bacteroidia; o__Chitinophagales; f__CAMDFR01; g__CAMDFR01				rare	0.23	0.0202985	23	34.3284			0.01	0	0	0	0	0	0	0	0	0	0	0	0	0	0	0.01	0	0.01	0	0	0	0	0.02	0	0	0.03	0	0.08	0.23	0	0.18	0	0	0.05		0.01	0	0
282	d__Bacteria; p__Pseudomonadota; c__Alphaproteobacteria; o__Caulobacterales; f__Caulobacteraceae; g__Caulobacter	taxonomy=Bacteria/Proteobacteria/Alphaproteobacteria/Caulobacterales_Caulobacteraceae/Caulobacter_2		1	rare	0.32	0.0201493	20	29.8507	yes		0	0.28	0	0	0	0	0.01	0	0	0	0	0	0	0	0	0	0	0	0.32	0	0	0	0	0	0	0	0.02	0	0.02	0	0	0.02	0	0.01		0	0.01	0
283	d__Bacteria; p__Planctomycetota; c__Planctomycetia; o__Pirellulales; f__UBA1268; g__CAMCQY01				rare	0.36	0.02	27	40.2985			0.1	0.09	0	0.01	0	0	0	0.03	0.01	0	0.04	0.01	0	0	0	0	0.02	0	0.02	0	0.15	0	0	0	0	0	0	0.36	0.03	0	0.05	0	0	0.02		0.05	0.04	0
284	d__Bacteria; p__Pseudomonadota; c__Alphaproteobacteria; o__Rickettsiales; f__UBA1997; g__JAJTDS01				rare	0.18	0.0198507	37	55.2239			0.02	0.05	0.04	0.07	0.14	0.08	0.04	0.01	0.02	0	0.02	0.06	0.01	0.01	0.04	0.14	0.18	0.02	0.01	0	0	0	0.01	0	0	0.03	0.03	0	0.05	0	0.01	0	0	0		0.01	0.01	0
285	d__Bacteria; p__Pseudomonadota; c__Alphaproteobacteria; o__SMXS01; f__SMXS01; g__RI-34				rare	0.29	0.0197015	26	38.806			0	0	0	0	0	0	0	0	0	0	0	0	0	0.05	0	0.11	0	0.01	0	0	0	0	0	0.01	0	0.07	0	0	0.01	0	0.06	0	0	0.29		0.03	0.01	0.01
286	d__Bacteria; p__Planctomycetota; c__Planctomycetia; o__Gemmatales; f__Gemmataceae; g__SIAJ01				rare	0.9	0.0197015	5	7.46269			0	0	0	0	0	0	0	0	0	0	0	0	0	0	0	0	0	0	0	0	0	0	0	0	0	0	0	0	0	0	0	0	0	0		0	0	0.21
287	d__Bacteria; p__Planctomycetota; c__Planctomycetia; o__Gemmatales; f__Gemmataceae; g__SIAQ01				rare	0.55	0.0197015	6	8.95522			0	0	0	0	0	0	0	0	0	0	0	0	0	0	0	0	0	0	0	0	0	0	0	0	0	0	0	0	0	0	0	0	0	0		0	0	0.13
288	d__Bacteria; p__Desulfobacterota_B; c__Binatia; o__UBA9968; f__UBA9968; g__DP-20				rare	0.59	0.0195522	6	8.95522			0	0	0	0	0	0	0	0	0	0	0	0	0	0	0	0	0	0	0	0	0	0	0	0	0	0	0	0	0	0	0	0	0	0		0	0	0.59
289	d__Bacteria; p__Cyanobacteriota; c__Cyanobacteriia; o__Cyanobacteriales; f__Microcoleaceae; g__Planktothrix				rare	0.9	0.0191045	15	22.3881			0	0	0	0	0	0	0.03	0	0	0	0	0.01	0	0	0.05	0.9	0.01	0	0	0	0	0	0	0	0	0.04	0	0	0	0	0	0	0	0.01		0	0	0
290	d__Bacteria; p__Verrucomicrobiota; c__Verrucomicrobiae; o__Pedosphaerales; f__F1-80-MAGS106; g__F1-80-MAGS106				rare	0.29	0.0189552	8	11.9403			0	0	0	0	0	0	0	0	0	0	0	0	0	0	0	0	0	0	0	0	0	0	0	0	0	0	0	0	0	0	0	0	0	0		0	0	0.19
291	d__Bacteria; p__Myxococcota; c__UBA9042; o__UBA9042; f__UBA9042; g__SXRM01				rare	0.42	0.018806	13	19.403			0	0	0	0	0	0	0	0	0	0	0	0	0	0	0	0	0	0	0	0	0	0	0	0	0	0	0	0	0.01	0	0	0	0	0		0	0	0.02
292	d__Bacteria; p__Pseudomonadota; c__Alphaproteobacteria; o__Rhizobiales; f__Beijerinckiaceae; g__CAIYZJ01				rare	0.17	0.0185075	33	49.2537			0.01	0	0	0	0	0	0.01	0	0	0.02	0	0	0	0.01	0.01	0.04	0	0.01	0	0	0	0	0	0	0	0.01	0.09	0	0.05	0	0	0.03	0	0.04		0	0.01	0
293	d__Bacteria; p__Pseudomonadota; c__Gammaproteobacteria; o__Methylococcales; f__Methylomonadaceae; g__Methylobacter_A				rare	0.69	0.0185075	12	17.9104			0	0	0	0	0	0	0	0	0	0	0	0	0	0	0	0	0	0	0	0	0	0	0	0	0	0	0	0	0	0	0	0	0	0.01		0	0	0
294	d__Bacteria; p__Pseudomonadota; c__Alphaproteobacteria; o__Rhizobiales; f__Beijerinckiaceae; g__Methylobacterium				rare	0.22	0.0183582	32	47.7612			0	0	0	0.01	0	0	0	0	0.02	0.08	0	0	0	0.01	0	0	0	0	0.03	0	0	0.02	0.01	0	0	0	0.03	0.02	0.04	0	0	0.02	0.01	0.04		0.04	0.01	0
295	d__Bacteria; p__Pseudomonadota; c__Gammaproteobacteria; o__Burkholderiales; f__Burkholderiaceae; g__Undibacterium	taxonomy=Bacteria/Proteobacteria/Gammaproteobacteria/Burkholderiales/Oxalobacteraceae/Undibacterium		3	rare	0.65	0.0183582	18	26.8657	yes		0	0	0	0	0	0	0	0	0	0	0	0	0.02	0	0	0	0	0	0	0	0	0	0	0	0	0	0	0	0.01	0	0	0	0	0		0	0.01	0
296	d__Bacteria; p__Patescibacteria; c__ABY1; o__SG8-24; f__UBA9934; g__CAIKHN01				rare	0.61	0.0180597	15	22.3881			0	0	0	0.01	0.03	0	0	0	0	0	0	0	0	0	0	0.05	0	0	0	0	0	0	0	0	0	0	0	0	0	0	0	0	0	0		0.02	0.02	0
297	d__Bacteria; p__Pseudomonadota; c__Alphaproteobacteria; o__Rhodobacterales; f__Rhodobacteraceae; g__Cypionkella				rare	0.24	0.0179104	18	26.8657			0	0.02	0	0.02	0	0	0.01	0.03	0.13	0	0.2	0.15	0	0	0	0	0.02	0.01	0.1	0	0.24	0	0	0	0	0	0.02	0.01	0	0.17	0	0.01	0	0		0	0	0
298	d__Bacteria; p__Actinomycetota; c__Actinomycetia; o__Nanopelagicales; f__S36-B12; g__UBA4592				rare	0.23	0.0176119	25	37.3134			0.01	0.01	0	0	0	0	0.06	0.13	0.01	0.07	0	0	0	0	0.01	0.01	0	0.04	0.23	0	0	0	0	0.01	0	0	0.01	0	0	0	0.03	0.04	0.03	0.05		0	0	0
299	d__Bacteria; p__Myxococcota; c__UBA796; o__UBA796; f__SXON01; g__CAIUMM01				rare	0.17	0.0174627	34	50.7463			0.02	0	0.01	0.04	0.17	0.02	0	0	0	0	0	0	0.02	0.03	0.02	0.04	0.03	0.01	0	0	0	0	0	0	0	0.03	0.14	0	0	0	0.01	0	0	0.04		0.02	0	0.01
300	d__Bacteria; p__Actinomycetota; c__Acidimicrobiia; o__Acidimicrobiales; f__Ilumatobacteraceae; g__WLJO01				rare	0.18	0.0174627	26	38.806			0	0	0	0	0.01	0	0	0	0	0.02	0	0	0.01	0.01	0.01	0.01	0	0	0	0	0	0	0	0	0	0	0	0	0.07	0	0	0.01	0	0.18		0.01	0.01	0
301	d__Bacteria; p__Bacteroidota; c__Bacteroidia; o__Flavobacteriales; f__Schleiferiaceae; g__RFXV01				rare	0.43	0.0174627	8	11.9403			0	0	0	0	0	0	0	0.43	0	0	0.04	0.01	0	0	0	0	0	0	0	0.37	0.25	0	0	0	0	0	0	0	0	0	0	0	0	0		0	0	0
302	d__Bacteria; p__Acidobacteriota; c__Vicinamibacteria; o__Vicinamibacterales; f__SCN-69-37; g__SCUN01				rare	0.27	0.0173134	11	16.4179			0	0	0	0	0	0	0	0	0	0	0	0	0	0	0	0	0	0	0	0	0	0	0	0	0	0	0	0	0.06	0	0	0	0	0		0	0	0
303	d__Bacteria; p__Verrucomicrobiota; c__Verrucomicrobiae; o__Verrucomicrobiales; f__DEV007; g__Arctic95D-9				rare	0.2	0.0167164	18	26.8657			0	0	0	0	0	0	0	0.2	0.19	0.03	0.13	0.04	0	0	0	0	0	0.03	0	0	0.16	0	0.03	0	0	0	0	0.07	0	0	0	0	0	0		0	0	0
304	d__Bacteria; p__Bacteroidota; c__Bacteroidia; o__Bacteroidales; f__Prolixibacteraceae; g__JAAFHB01				rare	0.56	0.0167164	10	14.9254			0	0	0	0	0	0	0	0	0	0	0	0	0	0	0	0	0	0	0	0	0	0	0	0	0	0	0	0	0.01	0	0	0	0	0.02		0	0	0
305	d__Bacteria; p__Pseudomonadota; c__Gammaproteobacteria; o__Burkholderiales; f__Burkholderiaceae_B; g__Rubrivivax				rare	0.32	0.0165672	21	31.3433			0	0	0	0	0	0	0	0.01	0	0	0	0.01	0	0	0	0.01	0	0	0	0	0	0	0.02	0	0	0.03	0.01	0.32	0.01	0	0.02	0	0.14	0.04		0	0	0
306	d__Bacteria; p__Bacteroidota; c__Bacteroidia; o__Bacteroidales; f__Prolixibacteraceae; g__Draconibacterium				rare	0.64	0.0165672	6	8.95522			0	0	0	0	0	0	0	0	0	0	0	0	0	0	0	0	0	0	0	0	0	0	0	0	0	0	0	0	0	0	0	0	0	0.01		0	0	0
307	d__Bacteria; p__Verrucomicrobiota; c__Verrucomicrobiae; o__Pedosphaerales; f__JADJPG01; g__JADJPG01				rare	0.18	0.0164179	16	23.8806			0	0	0	0	0.01	0	0	0	0	0	0	0	0	0	0	0	0	0	0	0	0	0	0	0	0	0	0	0	0	0	0	0	0	0		0	0	0.02
308	d__Bacteria; p__Margulisbacteria; c__Marinamargulisbacteria; o__SXXA01_A; f__SICP01; g__CAMCZW01				rare	0.32	0.0164179	13	19.403			0	0	0	0	0	0	0	0	0	0.32	0	0	0	0	0.01	0	0	0	0	0	0	0	0	0	0	0	0	0	0	0	0	0	0	0		0.04	0.02	0
309	d__Bacteria; p__Planctomycetota; c__Planctomycetia; o__Pirellulales; f__UBA1268; g__RGVT01				rare	0.25	0.0159701	24	35.8209			0.01	0.21	0	0	0	0	0	0.04	0.07	0	0	0	0	0	0	0	0	0.01	0	0	0.01	0	0	0	0	0	0	0.06	0.06	0.25	0.02	0	0	0.04		0.01	0.04	0
310	d__Bacteria; p__Pseudomonadota; c__Gammaproteobacteria; o__Burkholderiales; f__SG8-39; g__CAIPUP01				rare	0.23	0.0156716	27	40.2985			0	0	0	0.01	0.01	0.09	0	0	0	0	0	0	0	0.04	0	0.04	0	0.09	0	0	0	0	0	0.02	0	0.01	0.1	0	0.1	0	0.01	0.01	0	0.02		0	0	0
311	d__Bacteria; p__Pseudomonadota; c__Alphaproteobacteria; o__Sphingomonadales; f__Sphingomonadaceae; g__Polymorphobacter				rare	0.39	0.0156716	9	13.4328			0	0	0	0	0	0	0	0	0	0	0	0	0	0	0.02	0	0	0	0.14	0	0	0	0	0	0	0	0.05	0	0	0.39	0	0.2	0	0		0	0	0
312	d__Bacteria; p__Pseudomonadota; c__Gammaproteobacteria; o__Burkholderiales; f__Burkholderiaceae; g__Telluria	taxonomy=Bacteria/Proteobacteria/Gammaproteobacteria/Burkholderiales/Oxalobacteraceae/Massilia_1		3	rare	0.73	0.0155224	14	20.8955	yes		0	0	0	0	0	0	0	0	0	0.03	0	0	0.01	0	0	0	0	0	0	0	0	0	0	0	0	0	0.01	0	0	0	0	0	0.01	0.01		0.01	0	0
313	d__Bacteria; p__Bacteroidota; c__Bacteroidia; o__AKYH767-A; f__OLB10; g__JAJTFW01				rare	0.26	0.0155224	26	38.806			0.02	0	0	0	0	0	0	0	0	0	0	0	0.01	0.04	0.01	0.01	0.03	0	0	0	0	0	0	0	0.02	0	0	0.04	0.01	0	0	0	0.02	0.01		0.04	0.02	0
314	d__Bacteria; p__Cyanobacteriota; c__Cyanobacteriia; o__Cyanobacteriales; f__Microcystaceae_A; g__Rippkaea				rare	0.89	0.0153731	4	5.97015			0	0	0	0	0	0	0	0	0	0	0	0	0	0	0	0	0	0	0	0	0	0	0	0.01	0	0	0	0	0	0	0	0	0	0.12		0	0	0
315	d__Bacteria; p__Verrucomicrobiota; c__Verrucomicrobiae; o__Chthoniobacterales; f__Terrimicrobiaceae; g__QYQL01				rare	0.58	0.0153731	17	25.3731			0	0	0	0	0	0	0	0.02	0.01	0	0.01	0.02	0	0.01	0	0	0	0	0.01	0	0	0	0	0	0	0.01	0	0	0	0	0	0	0.01	0.02		0	0	0
316	d__Bacteria; p__Pseudomonadota; c__Gammaproteobacteria; o__Pseudomonadales; f__Pseudohongiellaceae; g__Pseudohongiella				rare	0.22	0.0153731	10	14.9254			0	0	0	0	0	0	0	0	0	0	0	0	0	0	0	0	0	0	0.15	0	0.02	0	0	0.14	0	0.04	0	0.22	0	0.09	0.08	0	0	0		0	0	0
317	d__Bacteria; p__Pseudomonadota; c__Alphaproteobacteria; o__Rhizobiales; f__Beijerinckiaceae; g__Methylocystis				rare	0.17	0.0152239	25	37.3134			0.02	0	0.04	0.05	0.05	0.02	0	0	0	0	0	0	0	0	0.01	0.05	0.03	0.1	0	0	0	0	0	0	0	0	0	0.01	0.01	0	0.03	0	0	0.01		0.07	0.06	0.04
318	d__Bacteria; p__Pseudomonadota; c__Alphaproteobacteria; o__Rickettsiales; f__UBA1997; g__JAJTCH01				rare	0.1	0.0150746	37	55.2239			0.02	0.08	0.01	0.01	0.03	0.08	0.01	0	0	0.1	0	0.02	0	0.01	0	0.03	0.06	0.02	0.01	0	0	0	0	0.07	0	0	0.05	0	0.01	0	0.02	0	0	0.02		0.01	0.01	0.01
319	d__Bacteria; p__Pseudomonadota; c__Alphaproteobacteria; o__Rhizobiales; f__Hyphomicrobiaceae; g__CAMDPA01				rare	0.1	0.0150746	26	38.806			0	0	0	0.01	0.02	0.01	0	0	0	0.03	0	0	0	0	0	0	0	0	0	0	0	0	0	0.01	0	0	0	0	0.02	0	0	0	0	0		0.06	0.09	0.02
320	d__Bacteria; p__Acidobacteriota; c__Vicinamibacteria; o__Vicinamibacterales; f__SCN-69-37; g__SYFT01				rare	0.3	0.0150746	13	19.403			0	0	0	0	0	0	0	0	0	0	0	0	0	0	0	0	0	0	0	0	0	0	0	0	0	0	0	0	0	0	0	0	0	0		0.04	0.1	0.17
321	d__Bacteria; p__Spirochaetota; c__Leptospirae; o__Leptospirales; f__Leptospiraceae; g__JACKPB01				rare	0.32	0.0150746	21	31.3433			0	0	0	0	0	0	0.08	0	0.01	0	0.02	0.01	0	0	0	0	0.01	0	0.01	0	0	0.04	0.02	0.02	0	0	0	0.32	0	0	0.02	0	0.05	0		0	0	0
322	d__Bacteria; p__Pseudomonadota; c__Gammaproteobacteria; o__Burkholderiales; f__UBA11063; g__Aquella				rare	0.15	0.0149254	34	50.7463			0	0.03	0	0.03	0.01	0.03	0	0	0	0	0	0	0	0.02	0.01	0.02	0.01	0.01	0.01	0	0	0	0	0	0	0.15	0.03	0	0	0	0.01	0.12	0.01	0		0.03	0.02	0.01
323	d__Bacteria; p__Cyanobacteriota; c__Cyanobacteriia; o__Cyanobacteriales; f__Microcystaceae; g__Microcystis				rare	0.26	0.0146269	7	10.4478			0	0	0	0	0	0	0	0	0	0	0	0	0	0	0	0	0	0	0	0	0	0	0	0	0	0	0	0.14	0	0	0.01	0	0.26	0.06		0	0	0
324	d__Bacteria; p__Verrucomicrobiota; c__Kiritimatiellia; o__CAIKKV01; f__CAIKKV01; g__CAIKKV01				rare	0.63	0.0146269	2	2.98507			0	0	0	0	0	0	0	0	0	0	0	0	0	0	0	0	0	0	0	0	0	0	0	0	0	0	0	0	0	0	0	0	0	0		0	0	0
325	d__Bacteria; p__Desulfobacterota_B; c__Binatia; o__UBA1149; f__CAITLU01; g__CAITLU01				rare	0.85	0.0146269	3	4.47761			0	0	0	0	0	0	0	0	0	0	0	0	0	0	0	0	0	0	0	0	0	0	0	0	0	0	0	0	0	0	0	0	0	0		0	0	0
326	d__Bacteria; p__Gemmatimonadota; c__Gemmatimonadetes; o__Gemmatimonadales; f__GWC2-71-9; g__JABFSM01				rare	0.12	0.0143284	15	22.3881			0	0	0.01	0	0.01	0	0	0	0	0	0	0	0.01	0	0	0	0	0	0	0	0	0	0	0	0	0	0	0	0	0	0	0	0	0		0.09	0.09	0.08
327	d__Bacteria; p__Margulisbacteria; c__Marinamargulisbacteria; o__SXXA01; f__SXXA01; g__CAIPHK01				rare	0.1	0.0141791	26	38.806			0.01	0	0	0.02	0.02	0	0	0	0	0	0	0.01	0	0	0.01	0	0	0	0.07	0	0	0	0	0	0	0	0	0	0.04	0	0	0	0	0		0.04	0.02	0
328	d__Bacteria; p__Pseudomonadota; c__Gammaproteobacteria; o__Methylococcales; f__Methylomonadaceae; g__CAIQWF01				rare	0.34	0.0140299	8	11.9403			0	0	0	0	0	0	0	0	0	0	0	0	0	0	0	0	0	0	0	0	0	0	0	0	0	0	0	0	0	0	0	0	0	0.34		0	0	0
329	d__Bacteria; p__Acidobacteriota; c__Vicinamibacteria; o__Vicinamibacterales; f__UBA2999; g__WHSN01				rare	0.18	0.0140299	21	31.3433			0	0	0	0	0	0	0	0	0	0.01	0	0	0	0	0	0	0	0	0	0	0	0	0	0	0	0	0	0	0.06	0	0	0	0	0.01		0	0.02	0.05
330	d__Bacteria; p__Patescibacteria; c__Paceibacteria; o__UBA9983_A; f__PALSA-1337; g__C7867-002				rare	0.1	0.0140299	36	53.7313			0	0	0	0	0.01	0.01	0	0	0	0.01	0.01	0.01	0	0.01	0	0	0	0	0.01	0	0	0	0	0.02	0	0	0.01	0	0.02	0	0.01	0	0	0.04		0	0.01	0
331	d__Bacteria; p__Planctomycetota; c__Phycisphaerae; o__WQYP01; f__WQYP01; g__CAIMWO01				rare	0.57	0.0140299	3	4.47761			0	0	0	0	0	0	0	0	0	0	0	0	0	0	0	0	0	0	0	0	0	0	0	0	0	0	0	0	0	0	0	0	0	0		0	0	0
332	d__Bacteria; p__Patescibacteria; c__Paceibacteria; o__UBA6257; f__UBA11618; g__CALRGO01				rare	0.31	0.0138806	13	19.403			0.16	0	0.01	0	0.01	0	0	0	0	0	0	0	0.01	0	0	0	0	0	0	0	0	0	0	0	0	0	0	0	0	0	0	0	0	0		0.11	0.16	0
333	d__Bacteria; p__Patescibacteria; c__Saccharimonadia; o__Saccharimonadales; f__AQU-01; g__CALRGT01				rare	0.3	0.0138806	9	13.4328			0	0	0	0	0	0	0	0	0	0	0	0	0	0	0	0	0	0	0	0	0	0	0	0	0	0	0	0	0.02	0	0	0	0	0		0	0	0
334	d__Bacteria; p__Bacteroidota; c__Bacteroidia; o__Chitinophagales; f__Saprospiraceae; g__M3007				rare	0.14	0.0138806	20	29.8507			0	0	0	0	0	0	0	0	0	0	0	0	0	0	0.01	0	0.01	0	0	0	0	0	0	0	0	0	0.02	0.03	0.05	0.1	0	0.08	0.11	0		0	0	0
335	d__Bacteria; p__Pseudomonadota; c__Gammaproteobacteria; o__Burkholderiales; f__Nitrosomonadaceae; g__Nitrosomonas				rare	0.36	0.0137313	10	14.9254			0	0	0	0	0	0	0	0	0	0	0	0	0	0	0	0	0	0	0	0	0	0	0	0	0	0	0	0	0.03	0	0	0	0	0		0	0	0
336	d__Bacteria; p__Verrucomicrobiota; c__Verrucomicrobiae; o__Pedosphaerales; f__UBA11358; g__UBA11358				rare	0.32	0.0135821	21	31.3433			0	0	0	0	0	0	0	0	0	0.01	0	0	0	0	0	0	0	0	0	0	0	0	0	0	0	0	0.06	0	0.01	0	0	0	0	0.02		0.02	0.01	0.01
337	d__Bacteria; p__Patescibacteria; c__ABY1; o__SG8-24; f__GWF2-40-263; g__YC12-FULL-57-11				rare	0.36	0.0135821	12	17.9104			0.01	0	0	0.01	0	0	0	0	0	0	0	0	0	0	0	0	0	0	0	0	0	0	0	0	0	0	0	0	0	0	0	0	0	0		0.07	0.01	0.01
338	d__Bacteria; p__Pseudomonadota; c__Alphaproteobacteria; o__Rhodospirillales; f__Rhodospirillaceae; g__JAIBCD01				rare	0.07	0.0132836	31	46.2687			0	0	0	0	0	0.01	0	0	0	0.02	0	0	0	0	0	0.02	0	0.01	0	0	0	0	0	0.06	0	0.01	0	0	0.05	0	0.01	0	0	0.01		0.05	0.06	0.07
339	d__Bacteria; p__Verrucomicrobiota; c__Verrucomicrobiae; o__Verrucomicrobiales; f__V1-33; g__V1-33				rare	0.33	0.0132836	16	23.8806			0	0	0	0.03	0	0.03	0	0	0	0	0	0	0	0	0	0	0	0	0	0	0	0	0	0	0	0.05	0	0.02	0	0	0.02	0	0.02	0		0.06	0.16	0.03
340	d__Bacteria; p__Actinomycetota; c__Acidimicrobiia; o__Acidimicrobiales; f__WLNW01; g__WLNW01				rare	0.1	0.0131343	24	35.8209			0.01	0	0	0	0	0	0	0	0	0.05	0	0	0	0	0	0.03	0	0	0	0	0	0	0	0	0	0	0	0	0.02	0	0	0	0	0		0.04	0.02	0.01
341	d__Bacteria; p__Bacteroidota; c__Bacteroidia; o__Bacteroidales; f__UBA1556; g__UBA6267				rare	0.51	0.0129851	2	2.98507			0	0	0	0	0	0	0	0	0	0	0	0	0	0	0	0	0	0	0	0	0	0	0	0	0	0	0	0	0	0	0	0	0	0		0	0	0
342	d__Bacteria; p__Pseudomonadota; c__Gammaproteobacteria; o__Burkholderiales; f__Rhodocyclaceae; g__Propionivibrio				rare	0.29	0.0129851	6	8.95522			0	0	0	0	0	0	0	0	0	0	0	0	0	0	0	0	0	0	0	0	0	0	0	0	0	0	0	0	0	0	0	0	0	0		0	0	0
343	d__Bacteria; p__Patescibacteria; c__Paceibacteria; o__UBA9983_A; f__UBA5272; g__UBA11704				rare	0.3	0.0128358	28	41.791			0	0	0	0	0	0	0	0	0	0.01	0	0	0	0	0	0.01	0	0	0	0	0	0	0	0.01	0	0	0	0	0.01	0	0.01	0	0	0.02		0	0	0
344	d__Bacteria; p__Bacteroidota; c__Bacteroidia; o__Flavobacteriales; f__UA16; g__CAMCTV01				rare	0.28	0.0128358	12	17.9104			0	0	0	0.07	0	0.02	0	0.05	0	0	0	0.28	0	0.12	0	0.02	0	0	0	0	0.02	0	0.07	0	0	0.02	0	0.06	0	0	0	0	0.09	0		0	0	0
345	d__Bacteria; p__Bdellovibrionota; c__Bacteriovoracia; o__Bacteriovoracales; f__Bacteriovoracaceae; g__Bacteriovorax				rare	0.21	0.0128358	23	34.3284			0	0	0	0	0	0	0	0	0	0	0	0	0	0	0	0	0	0	0.02	0	0	0	0	0.01	0	0	0.07	0	0.03	0	0	0	0	0.02		0	0	0
346	d__Bacteria; p__Bacteroidota; c__Bacteroidia; o__Flavobacteriales; f__UA16; g__CAMCYM01				rare	0.59	0.0128358	9	13.4328			0	0.03	0	0	0	0.02	0	0.02	0	0	0	0	0	0	0	0.05	0	0.05	0	0	0	0	0	0	0	0.03	0	0	0	0	0.03	0	0.59	0		0	0	0
347	d__Bacteria; p__Patescibacteria; c__ABY1; o__BM507; f__UBA12465; g__JAEZRQ01				rare	0.71	0.0126866	5	7.46269			0	0	0	0	0	0	0	0	0	0	0	0	0	0	0	0	0	0	0	0	0	0	0	0	0	0	0	0	0	0	0	0	0	0.02		0	0	0
348	d__Bacteria; p__Pseudomonadota; c__Gammaproteobacteria; o__Pseudomonadales; f__CAMAPQ01; g__CAMAPQ01				rare	0.32	0.0125373	8	11.9403			0	0	0	0	0	0	0	0	0	0	0	0	0.31	0	0.02	0	0	0	0	0	0	0	0	0	0.09	0	0	0	0	0	0	0	0	0		0	0	0
349	d__Bacteria; p__Actinomycetota; c__Acidimicrobiia; o__Acidimicrobiales; f__Ilumatobacteraceae; g__UBA668				rare	0.15	0.0125373	13	19.403			0	0	0	0	0	0	0	0	0	0	0	0	0	0.01	0	0	0	0	0	0	0	0	0	0	0	0	0.01	0.07	0.15	0	0	0	0	0.04		0	0	0
350	d__Bacteria; p__Bacteroidota; c__Bacteroidia; o__SXHM01; f__SXHM01; g__SXHM01				rare	0.14	0.0125373	18	26.8657			0	0	0	0	0	0	0	0	0	0	0	0	0	0	0	0	0	0	0	0	0	0	0	0	0	0	0	0	0	0	0	0	0	0		0	0.02	0.01
351	d__Bacteria; p__Bacteroidota; c__Bacteroidia; o__UBA10329; f__UBA10329; g__JAIPBJ01				rare	0.49	0.0125373	12	17.9104			0	0	0	0	0.12	0	0	0	0	0	0	0.01	0	0	0	0	0.01	0	0	0	0	0	0	0.01	0	0	0	0	0	0.06	0	0	0	0		0	0.01	0
352	d__Bacteria; p__Dependentiae; c__Babeliae; o__Babeliales; f__RVW-14; g__CAMATL01				rare	0.21	0.0123881	16	23.8806			0	0.01	0	0.03	0.01	0	0	0	0	0	0	0	0	0.02	0	0	0	0	0	0	0	0	0	0	0	0	0	0	0	0	0	0	0	0		0.05	0.05	0.01
353	d__Bacteria; p__Verrucomicrobiota; c__Lentisphaeria; o__Lentisphaerales; f__Lentisphaeraceae; g__CAMCSH01				rare	0.3	0.0122388	12	17.9104			0	0	0	0	0	0	0	0	0	0	0	0	0.3	0	0.01	0	0	0	0	0	0	0	0	0	0.11	0	0	0	0.02	0	0	0	0	0		0	0	0.05
354	d__Bacteria; p__Bdellovibrionota; c__Oligoflexia; o__Silvanigrellales; f__Silvanigrellaceae; g__RFOM01				rare	0.43	0.0122388	4	5.97015			0	0	0	0	0	0.08	0	0.43	0	0	0	0.28	0	0	0	0	0	0	0	0	0	0	0	0	0	0	0	0	0	0	0	0	0	0		0	0	0
355	d__Bacteria; p__Verrucomicrobiota; c__Verrucomicrobiae; o__Opitutales; f__Opitutaceae; g__Opi-474				rare	0.68	0.0120896	9	13.4328			0	0	0	0	0	0	0	0	0	0	0	0	0	0	0	0	0	0	0	0	0	0	0	0	0	0	0	0	0.01	0	0	0	0	0.01		0	0	0
356	d__Bacteria; p__Verrucomicrobiota; c__Verrucomicrobiae; o__Opitutales; f__UBA953; g__UBA8828				rare	0.45	0.011791	3	4.47761			0	0	0	0	0	0	0	0	0	0	0	0	0	0	0	0	0	0	0	0	0	0	0	0	0	0	0.01	0	0	0	0	0	0	0.45		0	0	0
357	d__Bacteria; p__Verrucomicrobiota; c__Verrucomicrobiae; o__Pedosphaerales; f__UBA8199; g__UBA693				rare	0.78	0.011791	2	2.98507			0	0	0	0	0	0	0	0	0	0	0	0	0	0	0	0	0	0	0	0	0	0	0	0	0	0	0	0	0	0	0	0	0	0		0	0	0
358	d__Bacteria; p__Verrucomicrobiota; c__Verrucomicrobiae; o__Pedosphaerales; f__UBA9464; g__UBA6176				rare	0.23	0.011791	23	34.3284			0	0	0	0.01	0.01	0	0	0	0	0	0	0.01	0	0.01	0	0	0	0	0	0	0	0	0	0	0	0	0.02	0.01	0.09	0	0	0	0.02	0		0.01	0.02	0
359	d__Bacteria; p__Planctomycetota; c__Planctomycetia; o__Pirellulales; f__Pirellulaceae; g__UBA6163				rare	0.4	0.011791	5	7.46269			0	0	0	0	0	0	0	0	0	0	0	0	0	0	0	0	0	0	0.28	0	0	0	0	0	0	0	0	0.01	0	0	0	0	0	0		0	0	0
360	d__Bacteria; p__Margulisbacteria; c__Marinamargulisbacteria; o__CAMDBA01; f__CAMDBA01; g__CAMDBA01				rare	0.16	0.0116418	27	40.2985			0	0	0	0.03	0	0.01	0	0	0	0.02	0	0.01	0	0	0.01	0.01	0	0	0	0	0	0	0	0	0	0	0	0	0	0	0	0	0	0		0.01	0.01	0
361	d__Bacteria; p__Actinomycetota; c__Actinomycetia; o__Nanopelagicales; f__S36-B12; g__Mxb001				rare	0.24	0.0116418	12	17.9104			0	0	0	0	0	0	0	0	0	0	0	0	0.01	0.03	0.02	0.19	0	0	0	0	0	0	0	0	0.13	0.08	0	0.02	0	0	0	0	0	0		0	0	0
362	d__Bacteria; p__Bacteroidota; c__Bacteroidia; o__Sphingobacteriales; f__CAIKLP01; g__CAJBVG01				rare	0.25	0.0116418	10	14.9254			0	0	0	0	0	0	0	0	0	0	0	0	0	0	0	0	0	0	0	0	0	0	0	0.01	0	0	0	0	0	0	0.04	0	0	0		0	0	0
363	d__Bacteria; p__Patescibacteria; c__Paceibacteria; o__UBA9983_A; f__PALSA-1337; g__CAIOGI01				rare	0.1	0.011194	26	38.806			0	0	0	0	0	0	0	0	0	0.01	0	0	0	0	0	0	0	0	0	0	0	0	0	0.01	0	0	0	0	0.02	0	0.01	0	0	0.01		0	0	0
364	d__Bacteria; p__Bacteroidota; c__Bacteroidia; o__Chitinophagales; f__LD1; g__Bog-950				rare	0.15	0.011194	14	20.8955			0	0	0	0	0	0	0	0	0	0	0	0	0	0	0	0	0	0	0	0	0	0	0.06	0	0	0	0	0.05	0.03	0	0	0	0.1	0		0	0	0
365	d__Bacteria; p__Pseudomonadota; c__Alphaproteobacteria; o__Sphingomonadales; f__Sphingomonadaceae; g__Erythrobacter	taxonomy=Bacteria/Proteobacteria/Alphaproteobacteria/Sphingomonadales_Sphingomonadaceae/Erythrobacter_1		1	rare	0.19	0.011194	13	19.403	yes		0	0.01	0	0	0	0	0	0.14	0.03	0	0.06	0.1	0	0	0	0	0	0	0	0	0.14	0	0	0	0	0	0	0.19	0	0	0.01	0	0.01	0		0	0	0
366	d__Bacteria; p__Planctomycetota; c__Planctomycetia; o__Gemmatales; f__Gemmataceae; g__Gemmata				rare	0.19	0.0110448	12	17.9104			0	0	0	0.01	0	0	0	0	0	0	0	0	0	0	0	0	0	0	0	0	0	0	0	0	0	0	0	0	0	0	0	0	0	0		0.02	0.05	0.05
367	d__Bacteria; p__Pseudomonadota; c__Gammaproteobacteria; o__Methylococcales; f__Methylomonadaceae; g__Methylovulum				rare	0.59	0.0110448	12	17.9104			0	0	0	0	0	0	0	0	0	0	0	0	0	0	0	0	0	0	0	0	0	0	0	0.02	0	0	0	0	0	0	0.01	0	0	0.02		0	0	0.01
368	d__Bacteria; p__Desulfobacterota; c__Desulfobacteria; o__Desulfobacterales; f__Desulfobacteraceae; g__Desulfobacula				rare	0.59	0.0110448	4	5.97015			0	0	0	0	0	0	0	0	0	0	0	0	0	0	0	0	0	0	0	0	0	0	0	0	0	0	0	0	0	0	0	0	0	0		0	0	0
369	d__Bacteria; p__Patescibacteria; c__ABY1; o__SG8-24; f__UBA9934; g__UBA11707				rare	0.44	0.0107463	5	7.46269			0	0	0	0	0	0	0	0	0	0	0	0	0	0	0	0	0	0	0	0	0	0	0	0	0	0	0	0	0	0	0	0	0	0		0	0	0
370	d__Bacteria; p__Bacteroidota; c__Bacteroidia; o__Chitinophagales; f__JADJOU01; g__CHPMRC01				rare	0.37	0.0107463	12	17.9104			0	0	0	0	0	0.04	0	0	0	0	0	0	0.01	0.01	0	0.02	0	0.01	0	0	0.01	0.11	0	0.02	0	0	0	0.37	0	0	0.07	0	0	0		0	0	0
371	d__Bacteria; p__Planctomycetota; c__Planctomycetia; o__Planctomycetales; f__Planctomycetaceae; g__JAKFVC01				rare	0.22	0.0104478	6	8.95522			0	0	0	0	0	0	0	0	0	0	0	0	0	0	0	0	0	0	0	0	0	0	0	0	0	0	0	0	0	0	0	0	0	0		0	0.03	0
372	d__Bacteria; p__Pseudomonadota; c__Alphaproteobacteria; o__Rickettsiales; f__UBA1997; g__CAMDAI01				rare	0.28	0.0102985	11	16.4179			0	0	0	0	0	0.01	0	0	0	0.04	0.28	0.08	0	0	0	0	0	0	0	0	0	0	0	0.01	0	0	0	0	0	0	0	0	0	0.01		0	0	0
373	d__Bacteria; p__Myxococcota; c__UBA9042; o__UBA9042; f__UBA9042; g__CAIYBN01				rare	0.35	0.0102985	6	8.95522			0	0	0	0	0	0	0	0	0	0	0	0	0	0	0	0	0	0	0	0	0	0	0	0	0	0	0	0	0	0	0	0	0	0.05		0	0	0
374	d__Bacteria; p__Pseudomonadota; c__Alphaproteobacteria; o__Rhodobacterales; f__Rhodobacteraceae; g__CAIYZT01				rare	0.25	0.0101493	21	31.3433			0	0	0	0	0.01	0	0	0	0	0.01	0	0	0	0	0.02	0	0	0.01	0	0	0	0	0	0	0	0	0	0	0	0	0	0	0	0		0.01	0.02	0.01
375	d__Bacteria; p__Planctomycetota; c__UBA1135; o__UBA2386; f__UBA2386; g__BJHM01				rare	0.2	0.0101493	8	11.9403			0	0	0	0	0	0	0	0	0	0	0	0	0.01	0	0	0	0	0	0	0	0	0	0	0	0	0	0	0	0	0	0	0	0	0		0	0	0
376	d__Bacteria; p__Pseudomonadota; c__Gammaproteobacteria; o__Legionellales; f__Legionellaceae; g__DDPF01				rare	0.15	0.0101493	26	38.806			0	0	0	0.01	0	0	0	0	0	0.05	0	0	0	0	0	0	0.01	0	0.02	0	0	0	0	0	0	0	0	0	0	0	0	0	0	0.01		0	0.01	0
377	d__Bacteria; p__Bacteroidota; c__Bacteroidia; o__Bacteroidales; f__UBA12481; g__UBA12481				rare	0.49	0.0101493	4	5.97015			0	0	0	0	0	0	0	0	0	0	0	0	0	0	0	0	0	0	0	0	0	0	0	0	0	0	0	0	0	0	0	0	0	0		0	0	0
378	d__Bacteria; p__Pseudomonadota; c__Alphaproteobacteria; o__Rhizobiales; f__Aestuariivirgaceae; g__CABJBCQ01				rare	0.17	0.01	11	16.4179			0	0	0	0	0	0	0	0	0	0	0	0	0	0	0.17	0.12	0.03	0.06	0	0	0	0	0	0	0.1	0.04	0.01	0	0	0	0	0	0	0		0	0	0
379	d__Bacteria; p__Myxococcota; c__Bradymonadia; o__REDH01; f__REDH01; g__REDH01				rare	0.17	0.01	23	34.3284			0	0	0	0	0.02	0	0	0	0	0	0	0.01	0	0.04	0	0.02	0	0	0	0	0	0	0	0	0	0	0.17	0	0.01	0	0.03	0	0	0		0.01	0.02	0
380	d__Bacteria; p__Pseudomonadota; c__Alphaproteobacteria; o__Dongiales; f__Dongiaceae; g__Dongia				rare	0.27	0.01	10	14.9254			0	0	0	0	0	0	0	0	0	0	0	0	0	0	0.06	0	0	0	0	0	0	0	0	0	0	0.06	0	0	0	0	0	0	0	0		0.01	0.02	0
381	d__Bacteria; p__Dependentiae; c__Babeliae; o__Babeliales; f__Chromulinivoraceae; g__Chromulinivorax				rare	0.1	0.00985075	22	32.8358			0	0	0.01	0.01	0	0	0	0	0	0	0	0	0	0	0	0	0	0	0	0	0	0	0	0	0	0.01	0	0	0.02	0	0	0	0	0.02		0.01	0	0.03
382	d__Bacteria; p__Patescibacteria; c__Paceibacteria; o__UBA9983_A; f__UBA2100; g__JAGOVW01				rare	0.28	0.00970149	8	11.9403			0.01	0	0	0	0.02	0	0	0	0	0	0	0	0	0	0	0	0	0	0	0	0	0	0	0	0	0	0	0	0	0	0	0	0	0		0.04	0.28	0
383	d__Bacteria; p__Chlamydiota; c__Chlamydiia; o__Chlamydiales; f__Rhabdochlamydiaceae; g__CAIJXB01				rare	0.2	0.00955224	14	20.8955			0	0	0	0	0	0	0.01	0	0	0	0	0	0	0	0	0	0	0	0	0	0	0	0	0	0	0	0	0.05	0	0	0	0	0	0		0	0	0
384	d__Bacteria; p__Patescibacteria; c__Paceibacteria; o__UBA9983_A; f__CAIZLB01; g__CAIZLB01				rare	0.12	0.00940299	20	29.8507			0.03	0.01	0	0	0	0	0.01	0.01	0	0.01	0	0.02	0	0	0.08	0	0	0	0	0	0	0.01	0	0	0	0	0.01	0	0	0	0	0	0	0		0.03	0	0
385	d__Bacteria; p__Patescibacteria; c__Paceibacteria; o__UBA9983_A; f__Zambryskibacteraceae; g__C7867-006				rare	0.09	0.00940299	28	41.791			0	0	0	0	0.01	0	0	0	0	0.01	0.01	0	0	0	0	0	0	0	0	0	0	0	0	0.01	0	0	0.01	0	0.02	0	0	0	0	0.03		0	0	0
386	d__Bacteria; p__Desulfobacterota_B; c__Binatia; o__UBA12015; f__UBA12015; g__REEB422				rare	0.17	0.00940299	12	17.9104			0	0	0	0	0	0	0	0	0	0	0	0	0	0	0	0	0	0	0	0	0	0	0	0	0	0	0	0	0.01	0	0	0	0	0		0	0	0
387	d__Bacteria; p__Pseudomonadota; c__Gammaproteobacteria; o__Burkholderiales; f__Burkholderiaceae_B; g__JAAFJR01				rare	0.52	0.00940299	8	11.9403			0	0	0.02	0	0.01	0	0	0	0	0	0	0	0	0	0	0	0	0	0	0	0	0	0	0	0	0	0	0	0	0	0	0	0	0		0	0	0.03
388	d__Bacteria; p__Planctomycetota; c__GCA-002687715; o__GCA-002687715; f__CAIWVZ01; g__CAIWVZ01				rare	0.49	0.00940299	5	7.46269			0	0	0	0	0	0	0	0	0	0	0	0	0	0	0	0	0	0	0	0	0	0	0	0	0	0	0	0	0	0	0	0	0	0		0	0	0
389	d__Bacteria; p__Pseudomonadota; c__Gammaproteobacteria; o__Burkholderiales; f__Rhodocyclaceae; g__CAIYYX01				rare	0.56	0.00925373	4	5.97015			0	0	0	0	0	0	0	0	0	0	0	0	0	0	0	0	0	0	0	0	0	0	0	0	0	0	0	0	0.01	0	0	0	0	0		0	0	0
390	d__Bacteria; p__Acidobacteriota; c__Holophagae; o__Holophagales; f__Holophagaceae; g__Holophaga				rare	0.18	0.00925373	6	8.95522			0	0	0	0	0	0	0	0	0	0	0	0	0	0	0	0	0	0	0	0	0	0	0	0	0	0	0	0	0	0	0	0	0	0		0	0	0
391	d__Bacteria; p__Planctomycetota; c__Phycisphaerae; o__WQYP01; f__WQYP01; g__JAJYPG01				rare	0.46	0.00925373	2	2.98507			0	0	0	0	0	0	0	0	0	0	0	0	0	0	0	0	0	0	0	0	0	0	0	0	0	0	0	0	0	0	0	0	0	0		0	0	0
392	d__Bacteria; p__Actinomycetota; c__Acidimicrobiia; o__Acidimicrobiales; f__CAIXPF01; g__CAIXPF01				rare	0.09	0.00925373	14	20.8955			0	0	0	0	0	0	0	0	0	0	0	0	0	0	0	0.01	0	0	0	0	0	0	0	0	0	0	0	0	0	0	0	0	0	0		0.04	0.05	0.08
393	d__Bacteria; p__Pseudomonadota; c__Gammaproteobacteria; o__Steroidobacterales; f__Steroidobacteraceae; g__ZC4RG30				rare	0.21	0.00910448	8	11.9403			0	0	0	0	0	0	0	0	0	0	0	0	0	0.05	0	0	0	0	0	0	0	0	0	0	0	0	0.12	0	0.09	0	0	0.02	0	0		0	0	0
394	d__Bacteria; p__Patescibacteria; c__Paceibacteria; o__Moranbacterales; f__UBA2206; g__UBA9630				rare	0.53	0.00910448	6	8.95522			0	0	0	0	0	0	0	0	0	0	0	0	0	0	0	0	0	0	0	0	0	0	0	0	0	0	0	0	0	0	0	0	0	0		0	0	0
395	d__Bacteria; p__Chloroflexota; c__Anaerolineae; o__Caldilineales; f__Caldilineaceae; g__JACQGT01				rare	0.19	0.00910448	10	14.9254			0	0	0	0	0	0	0	0	0	0	0	0	0	0	0	0	0	0	0	0	0	0	0	0	0	0	0	0	0	0	0	0	0	0		0.01	0.04	0.14
396	d__Archaea; p__Nanoarchaeota; c__Nanoarchaeia; o__Woesearchaeales; f__GW2011-AR9; g__CAMAVK01				rare	0.37	0.00910448	4	5.97015			0	0	0	0	0	0	0	0	0	0	0	0	0	0	0	0	0	0	0	0	0	0	0	0	0	0	0	0	0	0	0	0	0	0		0	0	0
397	d__Bacteria; p__Eisenbacteria; c__RBG-16-71-46; o__CAIMUX01; f__CAIMUX01; g__CAIMUX01				rare	0.3	0.00910448	3	4.47761			0	0	0	0	0	0	0	0	0	0	0	0	0	0	0	0	0	0	0	0	0	0	0	0	0	0	0	0	0	0	0	0	0	0		0	0	0
398	d__Bacteria; p__Verrucomicrobiota; c__Kiritimatiellia; o__UBA8416; f__UBA8416; g__UBA8416				rare	0.53	0.00895522	2	2.98507			0	0	0	0	0	0	0	0	0	0	0	0	0	0	0	0	0	0	0	0	0	0	0	0	0	0	0	0	0	0	0	0	0	0		0	0	0
399	d__Bacteria; p__Myxococcota; c__Polyangia; o__Polyangiales; f__JADJQN01; g__CAIUAC01				rare	0.25	0.00895522	8	11.9403			0	0	0	0	0	0	0	0	0	0	0	0	0	0	0	0	0	0	0	0	0	0	0	0	0	0	0	0	0	0	0	0	0	0		0	0	0
400	d__Bacteria; p__Pseudomonadota; c__Gammaproteobacteria; o__Diplorickettsiales; f__Diplorickettsiaceae; g__Aquirickettsiella				rare	0.36	0.00880597	11	16.4179			0	0	0	0	0	0	0	0	0	0	0	0	0	0	0	0	0	0	0	0	0	0	0	0	0	0	0.02	0	0	0	0.01	0	0	0		0	0	0
401	d__Bacteria; p__Pseudomonadota; c__Gammaproteobacteria; o__Legionellales; f__Legionellaceae; g__Legionella				rare	0.15	0.00880597	26	38.806			0	0	0	0	0	0	0	0	0.03	0.01	0	0.02	0	0	0	0	0.01	0	0	0	0	0	0	0	0	0	0.01	0.01	0	0	0	0	0	0		0	0.01	0.01
402	d__Bacteria; p__Patescibacteria; c__ABY1; o__SG8-24; f__2-12-FULL-60-25; g__JAGOUA01				rare	0.53	0.00865672	3	4.47761			0	0	0	0	0	0	0	0	0	0	0	0	0	0	0	0	0	0	0	0	0	0	0	0	0	0	0	0.53	0	0	0	0	0	0		0	0	0
403	d__Bacteria; p__Patescibacteria; c__Paceibacteria; o__UBA9983_A; f__PALSA-1337; g__SCTV01				rare	0.1	0.00865672	13	19.403			0.02	0	0.1	0.03	0.03	0	0	0	0	0	0	0	0	0	0	0	0	0	0	0	0	0	0	0	0	0	0	0	0	0	0	0	0	0		0.06	0.07	0.05
404	d__Bacteria; p__Patescibacteria; c__Paceibacteria; o__UBA9983_A; f__UBA918; g__OLB19				rare	0.05	0.00850746	34	50.7463			0	0	0.01	0.01	0.01	0.01	0.02	0.01	0	0.02	0.01	0.02	0	0	0	0	0.01	0	0.01	0	0.01	0.01	0	0.02	0	0	0.01	0	0	0	0.02	0.02	0	0.01		0	0	0
405	d__Bacteria; p__Deinococcota; c__Deinococci; o__Deinococcales; f__Deinococcaceae; g__Deinococcus				rare	0.08	0.00850746	20	29.8507			0	0	0	0	0	0	0	0	0	0.03	0	0	0	0	0	0	0	0	0.01	0	0	0	0.01	0	0	0	0.01	0.01	0.03	0	0	0	0.01	0.04		0	0	0
406	d__Bacteria; p__Patescibacteria; c__Paceibacteria; o__Paceibacterales; f__Staskawiczbacteraceae; g__XYD1-FULL-39-28				rare	0.17	0.00850746	17	25.3731			0	0	0	0	0	0	0	0	0	0	0	0	0	0	0	0	0	0	0	0	0	0	0	0.02	0	0	0	0	0.02	0	0	0	0	0.07		0	0	0
407	d__Bacteria; p__Omnitrophota; c__Koll11; o__GIF10; f__Profunditerraquicolaceae; g__UBA6249				rare	0.16	0.00850746	21	31.3433			0	0	0	0	0	0	0	0	0	0	0	0	0	0	0	0	0	0	0	0	0	0	0	0.01	0	0	0	0	0	0	0	0	0	0.1		0	0.01	0
408	d__Bacteria; p__Verrucomicrobiota; c__Verrucomicrobiae; o__Pedosphaerales; f__SIBE01; g__SIBE01				rare	0.22	0.00850746	6	8.95522			0	0	0	0	0	0	0	0	0	0	0	0	0	0	0	0	0	0	0	0	0	0	0	0	0	0	0	0	0	0	0	0	0	0		0	0	0.03
409	d__Bacteria; p__Pseudomonadota; c__Alphaproteobacteria; o__Rickettsiales; f__Rickettsiaceae; g__GCF-002259525				rare	0.08	0.00835821	33	49.2537			0	0.01	0.01	0.02	0.02	0.02	0.02	0	0	0.01	0	0	0	0.01	0.01	0.02	0	0	0.02	0	0	0	0	0	0.01	0.01	0.01	0	0.03	0	0	0.01	0	0		0.01	0	0
410	d__Bacteria; p__Actinomycetota; c__Actinomycetia; o__Nanopelagicales; f__Nanopelagicaceae; g__IMCC26077				rare	0.22	0.00835821	11	16.4179			0	0	0	0	0	0	0	0	0	0	0	0	0.01	0.1	0	0.06	0	0	0	0	0	0	0.05	0.02	0.01	0.22	0	0.01	0	0	0.01	0	0	0		0	0	0
411	d__Bacteria; p__Actinomycetota; c__Actinomycetia; o__Nanopelagicales; f__Nanopelagicaceae; g__SYAN01				rare	0.55	0.00835821	2	2.98507			0	0	0	0	0	0	0	0	0	0	0	0	0	0	0	0	0	0	0	0	0	0	0	0	0	0	0	0.55	0	0	0	0	0	0		0	0	0
412	d__Bacteria; p__Bdellovibrionota; c__FAC87; o__UBA2466; f__UBA2466; g__RFNO01				rare	0.54	0.00835821	2	2.98507			0	0.02	0	0	0	0	0	0.54	0	0	0	0	0	0	0	0	0	0	0	0	0	0	0	0	0	0	0	0	0	0	0	0	0	0		0	0	0
413	d__Bacteria; p__Pseudomonadota; c__Gammaproteobacteria; o__Burkholderiales; f__Burkholderiaceae; g__Duganella	taxonomy=Bacteria/Proteobacteria/Gammaproteobacteria/Burkholderiales/Oxalobacteraceae/Duganella		13	rare	0.51	0.00820896	2	2.98507	yes		0	0	0	0	0	0	0	0	0	0	0	0	0	0	0	0	0	0	0	0	0	0	0	0	0	0	0	0	0	0	0	0	0	0		0	0	0
414	d__Bacteria; p__Pseudomonadota; c__Gammaproteobacteria; o__Burkholderiales; f__Burkholderiaceae_B; g__Ramlibacter				rare	0.11	0.00820896	29	43.2836			0	0	0	0	0	0	0	0	0	0	0	0	0	0	0.01	0.03	0	0.01	0	0	0	0	0.01	0.01	0	0.01	0	0.11	0.02	0	0.01	0	0.07	0		0.01	0.02	0.01
415	d__Bacteria; p__Pseudomonadota; c__Gammaproteobacteria; o__Burkholderiales; f__Rhodocyclaceae; g__Azonexus				rare	0.23	0.00820896	12	17.9104			0	0	0	0	0	0	0	0	0	0	0	0	0	0	0	0	0	0	0	0	0	0	0	0	0	0	0	0	0	0	0	0	0	0.02		0	0	0
416	d__Bacteria; p__Pseudomonadota; c__Gammaproteobacteria; o__Burkholderiales; f__SG8-39; g__2-12-FULL-64-23				rare	0.41	0.00820896	10	14.9254			0	0	0	0	0	0	0	0	0	0	0	0	0	0	0	0	0	0	0	0	0	0	0	0	0	0	0	0	0.01	0	0	0	0	0		0	0.01	0
417	d__Bacteria; p__Verrucomicrobiota; c__Verrucomicrobiae; o__Methylacidiphilales; f__CAMAQI01; g__CAMAQI01				rare	0.37	0.00820896	6	8.95522			0	0	0	0	0	0	0	0	0	0	0	0	0.05	0	0	0	0	0.03	0	0	0	0	0	0	0.02	0	0	0	0	0	0	0	0	0		0	0	0
418	d__Bacteria; p__Verrucomicrobiota; c__Verrucomicrobiae; o__Opitutales; f__Opitutaceae; g__UBA6669				rare	0.28	0.00820896	8	11.9403			0	0	0	0	0	0	0	0	0	0	0	0	0	0	0	0	0	0	0	0	0	0	0.28	0.01	0	0.08	0	0.09	0	0	0.04	0	0.01	0		0	0	0
419	d__Bacteria; p__Patescibacteria; c__JAEDAM01; o__BD1-5; f__UBA6164; g__UBA6164				rare	0.49	0.00820896	6	8.95522			0	0	0	0	0	0	0	0	0	0	0	0	0	0	0	0	0	0	0	0	0	0	0	0	0	0	0	0	0	0	0	0	0	0		0	0	0
420	d__Bacteria; p__Margulisbacteria; c__Marinamargulisbacteria; o__SXXA01; f__M30B43; g__M30B43				rare	0.17	0.00820896	11	16.4179			0.01	0.02	0	0.01	0.01	0	0	0	0	0	0	0.04	0	0	0	0.01	0	0	0.17	0	0	0	0	0	0	0	0	0	0	0	0	0	0	0		0	0	0
421	d__Bacteria; p__Omnitrophota; c__Koll11; o__Zapsychrales; f__Fredricksoniimonadaceae; g__Fredricksoniimonas				rare	0.23	0.00820896	10	14.9254			0	0	0	0	0	0	0	0	0	0	0	0	0	0	0	0	0	0	0	0	0	0	0	0	0	0	0	0	0	0	0	0	0	0.04		0	0	0
422	d__Bacteria; p__Pseudomonadota; c__Alphaproteobacteria; o__Acetobacterales; f__Acetobacteraceae; g__Rhodovarius				rare	0.44	0.0080597	5	7.46269			0	0.06	0	0	0	0	0	0.44	0.01	0	0	0	0	0	0	0	0	0	0	0	0	0	0	0	0	0	0.02	0.01	0	0	0	0	0	0		0	0	0
423	d__Bacteria; p__Pseudomonadota; c__Gammaproteobacteria; o__Burkholderiales; f__Burkholderiaceae_A; g__SYIM01				rare	0.22	0.0080597	7	10.4478			0	0	0	0	0	0	0	0	0	0	0	0	0	0.05	0	0.04	0	0	0	0	0	0	0.04	0	0	0.1	0	0.22	0.01	0	0	0	0.08	0		0	0	0
424	d__Bacteria; p__Verrucomicrobiota; c__Kiritimatiellia; o__RFP12; f__UBA1067; g__JAHFSX01				rare	0.28	0.0080597	3	4.47761			0	0	0	0	0	0	0	0	0	0	0	0	0	0	0	0	0	0	0	0	0	0	0	0	0	0	0	0	0	0	0	0	0	0		0	0	0
425	d__Bacteria; p__Bdellovibrionota; c__UBA1018; o__UBA1018; f__CAIMNF01; g__CAIMNF01				rare	0.13	0.0080597	12	17.9104			0	0.03	0	0	0	0	0	0.1	0	0	0	0	0	0.01	0	0.1	0	0	0	0	0	0	0.01	0.01	0	0.13	0	0.07	0	0	0	0	0.04	0		0	0	0
426	d__Bacteria; p__Pseudomonadota; c__Alphaproteobacteria; o__Rickettsiales; f__JAGVLN01; g__JAGVLN01				rare	0.15	0.00791045	25	37.3134			0	0	0	0.02	0	0.01	0	0	0	0	0	0	0.01	0.01	0.01	0.01	0	0.01	0	0	0	0	0	0	0	0.01	0	0	0	0	0	0	0	0		0.01	0.01	0
427	d__Bacteria; p__Bacteroidota; c__Bacteroidia; o__Chitinophagales; f__Chitinophagaceae; g__CAIWHF01				rare	0.2	0.00791045	10	14.9254			0	0	0	0	0	0	0	0	0	0	0	0	0	0.01	0	0.03	0	0.2	0	0	0	0	0	0	0	0.18	0	0	0.02	0	0.03	0	0	0.01		0	0	0
428	d__Bacteria; p__Bacteroidota; c__Bacteroidia; o__M30B66; f__M30B66; g__CAMCXT01				rare	0.26	0.00791045	17	25.3731			0.01	0.01	0	0	0	0	0.01	0	0	0	0	0.03	0	0	0	0	0.01	0	0	0	0.26	0	0.02	0	0	0	0	0.01	0.01	0	0.01	0	0.05	0		0	0	0
429	d__Bacteria; p__Pseudomonadota; c__Gammaproteobacteria; o__Burkholderiales; f__Rhodocyclaceae; g__JACRAR01				rare	0.35	0.00791045	4	5.97015			0	0	0	0	0	0	0	0	0	0	0	0	0	0	0	0	0	0	0	0	0	0	0	0	0	0	0	0	0.01	0	0	0	0	0		0	0	0
430	d__Bacteria; p__Dependentiae; c__Babeliae; o__Babeliales; f__RVW-14; g__CAIKAH01				rare	0.18	0.00791045	13	19.403			0	0	0	0	0	0	0	0	0	0	0	0	0	0	0	0.01	0.02	0	0	0	0	0	0	0	0.02	0	0	0	0.01	0	0	0	0	0		0.02	0	0
431	d__Bacteria; p__Bacteroidota; c__Bacteroidia; o__Bacteroidales; f__JACABE01; g__JACABE01				rare	0.33	0.00791045	3	4.47761			0	0	0	0	0	0	0	0	0	0	0	0	0	0	0	0	0	0	0	0	0	0	0	0	0	0	0	0	0	0	0	0	0	0		0	0	0
432	d__Bacteria; p__Gemmatimonadota; c__Gemmatimonadetes; o__Longimicrobiales; f__UBA6960; g__UBA2982				rare	0.2	0.00791045	7	10.4478			0	0	0	0	0	0	0	0	0	0	0	0	0	0	0	0	0	0	0	0	0	0	0	0	0	0	0	0	0	0	0	0	0	0		0	0.02	0.2
433	d__Bacteria; p__Patescibacteria; c__Saccharimonadia; o__Saccharimonadales; f__AWTP1-31; g__CAJAXB01				rare	0.12	0.00776119	15	22.3881			0.03	0	0	0	0	0	0	0	0	0	0	0	0	0	0	0	0	0	0.01	0	0	0	0	0	0	0	0	0	0	0	0	0	0	0		0.01	0.02	0
434	d__Bacteria; p__Omnitrophota; c__Koll11; o__2-01-FULL-45-10; f__2-01-FULL-45-10; g__CAIMPC01				rare	0.11	0.00776119	21	31.3433			0	0	0	0	0	0	0	0	0	0.01	0	0	0	0	0	0	0	0	0	0	0	0	0	0.01	0	0	0	0	0	0	0	0	0	0.11		0	0	0
435	d__Bacteria; p__Patescibacteria; c__Gracilibacteria; o__Peribacterales; f__Peribacteraceae; g__2-12-FULL-55-11				rare	0.31	0.00761194	3	4.47761			0	0	0	0	0	0	0	0	0	0	0	0	0.01	0	0	0	0	0	0	0	0	0	0	0	0	0	0	0	0	0	0	0	0	0		0	0	0
436	d__Bacteria; p__Pseudomonadota; c__Gammaproteobacteria; o__Legionellales; f__Legionellaceae; g__JAGVKL01				rare	0.12	0.00746269	24	35.8209			0	0	0	0	0	0	0.02	0	0	0	0	0	0	0	0	0.01	0	0	0	0	0	0	0	0	0	0	0	0	0.01	0	0	0	0	0		0	0.02	0.01
437	d__Bacteria; p__Pseudomonadota; c__Gammaproteobacteria; o__GCA-2729495; f__GCA-2729495; g__SHZI01				rare	0.15	0.00746269	13	19.403			0	0	0	0	0	0	0	0	0	0	0	0	0	0	0	0	0	0	0	0	0	0	0	0	0	0	0	0	0	0	0	0	0	0		0.03	0.02	0.01
438	d__Bacteria; p__Bacteroidota; c__Bacteroidia; o__Flavobacteriales; f__BACL11; g__BACL11				rare	0.12	0.00746269	12	17.9104			0	0	0	0.04	0	0	0	0	0	0	0	0	0	0	0.02	0.07	0	0	0	0	0	0	0	0	0	0	0	0	0	0	0	0	0	0		0	0	0.12
439	d__Bacteria; p__Bacteroidota; c__Bacteroidia; o__Bacteroidales; f__F082; g__CAJBPB01				rare	0.34	0.00731343	3	4.47761			0	0	0	0	0	0	0	0	0	0	0	0	0	0	0	0	0	0	0	0	0	0	0	0	0	0	0	0	0	0	0	0	0	0		0	0	0
440	d__Bacteria; p__Cyanobacteriota; c__Vampirovibrionia; o__LMEP-6097; f__LMEP-6097; g__LMEP-6097				rare	0.42	0.00731343	5	7.46269			0	0	0	0	0	0	0	0	0	0	0	0	0	0	0	0.03	0	0	0	0	0	0	0	0	0	0	0	0	0	0	0.02	0	0.42	0		0	0	0
441	d__Bacteria; p__Omnitrophota; c__Koll11; o__2-02-FULL-51-18; f__2-02-FULL-51-18; g__JACPAX01				rare	0.44	0.00731343	6	8.95522			0	0	0	0	0.01	0	0	0	0	0	0	0	0	0	0	0	0	0	0	0	0	0	0	0	0	0	0	0	0	0	0	0	0	0		0.01	0.01	0.01
442	d__Bacteria; p__Pseudomonadota; c__Alphaproteobacteria; o__CACIAM-22H2; f__CACIAM-22H2; g__Tagaea				rare	0.15	0.00716418	17	25.3731			0	0	0.15	0.01	0	0	0	0	0	0	0	0	0	0	0	0	0	0	0	0	0	0	0	0	0	0	0	0.02	0	0	0	0	0.02	0.05		0.01	0.03	0.01
443	d__Bacteria; p__Pseudomonadota; c__Alphaproteobacteria; o__UBA828; f__UBA828; g__SHWC01				rare	0.11	0.00716418	9	13.4328			0	0	0	0	0	0	0	0	0	0	0	0	0	0	0	0	0	0	0	0	0	0	0	0	0	0	0	0	0	0	0	0	0	0		0.01	0.03	0.11
444	d__Bacteria; p__Pseudomonadota; c__Alphaproteobacteria; o__Rhodospirillales_A; f__CAMCUA01; g__CAMCUA01				rare	0.06	0.00701493	19	28.3582			0	0	0	0.01	0	0	0	0	0	0	0	0	0	0	0	0	0	0	0	0	0	0	0	0	0	0	0	0	0.01	0	0	0	0	0		0.04	0.05	0.03
445	d__Archaea; p__Nanoarchaeota; c__Nanoarchaeia; o__Pacearchaeales; f__GW2011-AR1; g__CAIPOI01				rare	0.15	0.00701493	12	17.9104			0	0	0	0	0	0	0	0	0	0	0	0	0	0	0	0	0	0	0	0	0	0	0	0.03	0	0	0	0	0	0	0	0	0	0.13		0	0	0
446	d__Bacteria; p__Patescibacteria; c__Paceibacteria; o__UBA9983_A; f__CAIJKW01; g__CAIJKW01				rare	0.3	0.00701493	6	8.95522			0	0	0	0	0	0	0	0	0	0	0	0	0	0	0	0	0	0	0	0	0	0	0	0.02	0	0	0	0	0	0	0	0	0	0		0	0	0
447	d__Bacteria; p__Pseudomonadota; c__Alphaproteobacteria; o__Rhizobiales; f__Devosiaceae; g__Devosia_A				rare	0.1	0.00701493	16	23.8806			0	0	0	0	0	0	0	0.03	0	0	0.01	0.02	0	0	0	0	0	0	0.02	0	0	0	0	0	0	0	0	0	0	0	0	0	0	0.02		0	0	0
448	d__Bacteria; p__Desulfobacterota; c__Desulfobulbia; o__Desulfobulbales; f__Desulfocapsaceae; g__UBA2270				rare	0.37	0.00701493	4	5.97015			0	0	0	0	0	0	0	0	0	0	0	0	0	0	0	0	0	0	0	0	0	0	0	0	0	0	0	0	0	0	0	0	0	0		0	0	0
449	d__Bacteria; p__Pseudomonadota; c__Gammaproteobacteria; o__Ga0077536; f__Ga0077536; g__JADJYF01				rare	0.07	0.00686567	18	26.8657			0	0	0	0.01	0.02	0.02	0	0	0	0	0	0	0	0.04	0.02	0.07	0	0	0	0	0	0	0	0.01	0	0.01	0	0	0.03	0	0	0	0	0		0.03	0	0
450	d__Bacteria; p__Pseudomonadota; c__Gammaproteobacteria; o__Steroidobacterales; f__Steroidobacteraceae; g__CAIUGU01				rare	0.2	0.00686567	13	19.403			0	0	0	0	0	0	0	0	0	0.01	0	0	0	0	0	0	0	0	0	0	0	0	0	0	0	0	0	0	0.03	0	0	0	0	0.01		0	0	0
451	d__Bacteria; p__Patescibacteria; c__ABY1; o__SG8-24; f__UBA9934; g__JAGORL01				rare	0.23	0.00686567	9	13.4328			0	0	0	0	0	0	0	0	0	0	0	0	0.02	0	0	0	0	0	0	0	0	0	0	0	0	0	0	0	0	0	0	0	0	0		0	0	0.01
452	d__Bacteria; p__Fibrobacterota; c__Fibrobacteria; o__UBA11236; f__UBA11236; g__UBA11236				rare	0.28	0.00686567	4	5.97015			0	0	0	0	0	0	0	0	0	0	0	0	0	0	0	0	0	0	0	0	0	0	0	0	0	0	0	0	0.01	0	0	0	0	0		0	0	0
453	d__Bacteria; p__Verrucomicrobiota; c__Verrucomicrobiae; o__Pedosphaerales; f__UBA9464; g__SIBK01				rare	0.09	0.00671642	10	14.9254			0	0	0	0	0	0	0	0	0	0	0	0	0	0	0	0	0	0	0	0	0	0	0	0	0	0	0	0	0	0	0	0	0	0		0.01	0.09	0.08
454	d__Bacteria; p__Patescibacteria; c__JAEDAM01; o__BD1-5; f__UBA2023; g__UBA1545				rare	0.17	0.00671642	14	20.8955			0	0	0	0	0	0	0	0	0	0	0	0	0.01	0	0	0	0	0	0	0	0	0	0	0	0.03	0	0	0	0	0	0	0	0	0.03		0	0	0
455	d__Bacteria; p__Patescibacteria; c__Saccharimonadia; o__Saccharimonadales; f__UBA1547; g__UBA1547				rare	0.23	0.00671642	13	19.403			0	0	0	0	0	0	0	0	0	0	0	0	0	0	0	0	0	0	0	0	0	0	0	0	0	0	0	0	0	0	0	0	0	0.02		0	0	0
456	d__Bacteria; p__Actinomycetota; c__Actinomycetia; o__Nanopelagicales; f__S36-B12; g__UBA11398				rare	0.16	0.00671642	19	28.3582			0	0	0.01	0	0.01	0	0	0	0	0.02	0	0	0	0	0.01	0	0.01	0	0	0	0	0	0	0	0	0	0.03	0	0.03	0	0	0	0	0		0.01	0.01	0
457	d__Bacteria; p__Gemmatimonadota; c__Gemmatimonadetes; o__Gemmatimonadales; f__Gemmatimonadaceae; g__PNKL01				rare	0.17	0.00671642	5	7.46269			0	0	0	0	0	0	0	0	0	0	0	0	0	0	0	0	0	0	0	0	0	0	0	0	0	0	0	0	0	0	0	0	0	0		0	0	0
458	d__Bacteria; p__Patescibacteria; c__ABY1; o__BM507; f__UBA12465; g__UBA12465				rare	0.36	0.00671642	6	8.95522			0	0	0	0	0	0	0	0	0	0	0	0	0	0	0	0	0	0	0	0	0	0	0	0	0	0	0	0	0	0	0	0	0	0		0	0	0
459	d__Bacteria; p__Bacteroidota; c__Ignavibacteria; o__Ignavibacteriales; f__Ignavibacteriaceae; g__CAIYTF01				rare	0.45	0.00671642	1	1.49254			0	0	0	0	0	0	0	0	0	0	0	0	0	0	0	0	0	0	0	0	0	0	0	0	0	0	0	0	0	0	0	0	0	0		0	0	0
460	d__Bacteria; p__Actinomycetota; c__Actinomycetia; o__Nanopelagicales; f__CAIYMF01; g__WLRQ01				rare	0.17	0.00671642	6	8.95522			0	0	0	0	0	0	0	0	0	0	0	0	0	0	0	0	0	0	0	0	0	0	0	0	0	0	0	0	0.03	0	0	0	0	0.08		0	0	0
461	d__Bacteria; p__Bacteroidota; c__Bacteroidia; o__Flavobacteriales; f__Flavobacteriaceae; g__Lutibacter				rare	0.15	0.00671642	4	5.97015			0	0	0	0	0	0	0	0	0	0	0	0	0	0	0	0	0	0	0	0	0	0	0	0	0	0	0	0	0	0	0	0	0	0		0	0	0
462	d__Bacteria; p__Acidobacteriota; c__Holophagae; o__Holophagales; f__Holophagaceae; g__Geothrix				rare	0.19	0.00656716	8	11.9403			0	0	0	0	0	0	0	0	0	0	0	0	0	0	0	0	0	0	0	0	0	0	0	0	0	0	0	0	0	0	0	0	0	0.01		0	0	0
463	d__Bacteria; p__Actinomycetota; c__Acidimicrobiia; o__IMCC26256; f__IMCC26256; g__SHUZ01				rare	0.15	0.00656716	5	7.46269			0	0	0	0	0	0	0	0	0	0	0	0	0	0	0	0	0	0	0	0	0	0	0	0	0	0	0	0	0	0	0	0	0	0		0	0	0.08
464	d__Bacteria; p__Chloroflexota; c__Limnocylindria; o__P2-11E; f__P2-11E; g__SHYN01				rare	0.1	0.00656716	8	11.9403			0	0	0	0	0	0	0	0	0	0	0	0	0	0	0	0	0	0	0	0	0	0	0	0	0	0	0	0	0	0	0	0	0	0		0	0.04	0.05
465	d__Bacteria; p__Pseudomonadota; c__Alphaproteobacteria; o__UBA7879; f__VGCX01; g__VGCX01				rare	0.26	0.00641791	3	4.47761			0	0	0	0.01	0	0	0	0	0	0	0	0	0	0	0	0	0	0	0.16	0	0	0	0	0	0	0	0	0	0	0	0	0	0	0		0	0	0
466	d__Bacteria; p__Bacteroidota; c__Bacteroidia; o__Chitinophagales; f__Chitinophagaceae; g__Flavipsychrobacter				rare	0.12	0.00641791	10	14.9254			0	0	0	0	0	0	0	0	0	0	0	0	0	0	0	0	0	0	0	0	0	0	0	0	0	0	0.01	0.03	0.01	0	0	0	0	0.03		0	0	0
467	d__Bacteria; p__Actinomycetota; c__Acidimicrobiia; o__Acidimicrobiales; f__Ilumatobacteraceae; g__CAIYHK01				rare	0.08	0.00641791	7	10.4478			0	0	0	0	0	0	0	0	0	0	0	0	0	0.06	0	0.05	0	0	0	0	0	0	0.06	0	0	0.06	0	0.06	0	0	0.08	0	0	0		0	0	0
468	d__Bacteria; p__Bdellovibrionota; c__Oligoflexia; o__Oligoflexales; f__CAIMVM01; g__CAIMVM01				rare	0.23	0.00641791	7	10.4478			0	0	0	0	0	0.01	0	0	0	0	0	0	0.02	0	0	0	0	0	0.01	0	0	0	0	0	0	0	0.23	0	0	0	0	0	0	0		0	0	0
469	d__Bacteria; p__Actinomycetota; c__Acidimicrobiia; o__Acidimicrobiales; f__UBA8139; g__M30B73				rare	0.2	0.00626866	4	5.97015			0	0	0	0	0	0	0	0	0	0	0	0	0	0.01	0	0	0	0	0	0	0	0	0	0	0	0.2	0	0	0	0	0.11	0	0	0		0	0	0
470	d__Bacteria; p__Chloroflexota; c__UBA2235; o__UBA12225; f__UBA12225; g__CAILQO01				rare	0.2	0.00626866	4	5.97015			0	0	0	0	0	0	0	0	0	0	0	0	0	0	0	0	0	0	0	0	0	0	0	0	0	0	0	0	0	0	0	0	0	0		0	0	0.2
471	d__Bacteria; p__Bacteroidota; c__Bacteroidia; o__Chitinophagales; f__CAIOSU01; g__CAIOSU01				rare	0.41	0.00626866	2	2.98507			0	0	0	0	0	0	0	0.41	0	0	0	0.01	0	0	0	0	0	0	0	0	0	0	0	0	0	0	0	0	0	0	0	0	0	0		0	0	0
472	d__Bacteria; p__Pseudomonadota; c__Alphaproteobacteria; o__Rickettsiales; f__Deianiraeaceae; g__CAMCQG01				rare	0.09	0.0061194	17	25.3731			0	0	0	0	0	0	0.01	0	0	0	0	0	0.09	0	0.01	0.01	0.03	0	0	0	0	0	0	0.01	0.01	0	0.03	0	0	0	0.03	0	0	0.01		0	0	0
473	d__Bacteria; p__Patescibacteria; c__Paceibacteria; o__UBA9983_A; f__CAIZIN01; g__CAIZIN01				rare	0.09	0.0061194	14	20.8955			0	0	0	0	0	0	0	0	0	0	0	0	0	0	0	0	0	0	0	0	0	0	0	0	0	0	0	0	0	0	0	0	0	0.04		0	0	0
474	d__Bacteria; p__Planctomycetota; c__JADGBV01; o__JADGBV01; f__JADGBV01; g__JADGBV01				rare	0.26	0.0061194	5	7.46269			0	0	0	0	0	0	0	0	0	0	0	0	0	0	0	0	0	0	0	0	0	0	0	0	0	0	0	0	0	0	0	0	0	0		0	0.01	0
475	d__Bacteria; p__Hydrogenedentota; c__Hydrogenedentia; o__Hydrogenedentiales; f__JAEUWI01; g__JAEUWI01				rare	0.13	0.0061194	8	11.9403			0	0	0	0	0	0	0	0	0	0	0	0	0	0	0	0	0	0	0	0	0	0	0	0	0	0	0	0	0	0	0	0	0	0		0	0	0
476	d__Bacteria; p__Margulisbacteria; c__Riflemargulisbacteria; o__GWF2-35-9; f__DYQY01; g__DYQY01				rare	0.23	0.0061194	4	5.97015			0	0	0	0	0	0	0	0	0	0	0	0	0	0	0	0	0	0	0	0	0	0	0	0	0	0	0	0	0	0	0	0	0	0		0	0	0
477	d__Bacteria; p__Pseudomonadota; c__Alphaproteobacteria; o__Rhodospirillales; f__Magnetospirillaceae; g__Phaeospirillum				rare	0.32	0.0061194	6	8.95522			0	0	0	0	0	0	0	0	0	0	0	0	0	0	0	0	0	0	0	0	0	0	0	0	0	0	0	0	0	0	0	0	0	0		0	0	0
478	d__Bacteria; p__Spirochaetota; c__Spirochaetia; o__Treponematales; f__UBA12059; g__SZUA-370				rare	0.18	0.0061194	4	5.97015			0	0	0	0	0	0	0	0	0	0	0	0	0	0	0	0	0	0	0	0	0	0	0	0	0	0	0	0	0	0	0	0	0	0		0	0	0
479	d__Bacteria; p__Pseudomonadota; c__Gammaproteobacteria; o__UBA4486; f__UBA4486; g__CAMBTO01				rare	0.07	0.00597015	20	29.8507			0	0	0	0	0.01	0.01	0	0	0	0.01	0	0	0	0	0	0.02	0	0	0	0	0	0	0	0	0	0	0	0	0.02	0	0	0	0	0.01		0.07	0.02	0.01
480	d__Bacteria; p__Gemmatimonadota; c__Gemmatimonadetes; o__Longimicrobiales; f__UBA6960; g__UBA2988				rare	0.07	0.00597015	12	17.9104			0	0	0	0	0	0	0	0	0	0	0	0	0	0	0	0	0	0	0	0	0	0	0	0	0	0	0	0	0	0	0	0	0	0		0.02	0.06	0.07
481	d__Bacteria; p__Bacteroidota; c__Bacteroidia; o__Flavobacteriales; f__UBA2798; g__CAMBFX01				rare	0.12	0.00597015	11	16.4179			0	0	0.03	0	0.01	0	0	0	0	0	0	0	0	0	0	0	0.01	0	0	0	0	0	0	0	0	0	0	0	0	0	0	0	0	0		0.01	0	0.1
482	d__Bacteria; p__Pseudomonadota; c__Alphaproteobacteria; o__CADEGL01; f__CADEGL01; g__CAMAPP01				rare	0.08	0.00597015	9	13.4328			0	0	0	0	0	0	0	0	0	0	0	0	0	0	0	0	0	0	0	0	0	0	0	0	0	0	0	0	0	0	0	0	0	0		0.02	0.07	0.08
483	d__Bacteria; p__Patescibacteria; c__Paceibacteria; o__UBA9983_A; f__UBA11359; g__UBA11359				rare	0.24	0.00597015	8	11.9403			0	0	0	0	0	0	0	0	0	0	0	0	0	0	0	0	0	0	0	0	0	0	0	0.01	0	0	0	0	0	0	0	0	0	0.05		0	0	0
484	d__Bacteria; p__Bacteroidota; c__Bacteroidia; o__Bacteroidales; f__UBA932; g__Bact-08				rare	0.29	0.00597015	3	4.47761			0	0	0	0	0	0	0	0	0	0	0	0	0	0	0	0	0	0	0	0	0	0	0	0	0	0	0	0	0	0	0	0	0	0		0	0	0
485	d__Bacteria; p__Planctomycetota; c__UBA1135; o__UBA2386; f__UBA2386; g__SXPK01				rare	0.1	0.00597015	9	13.4328			0	0	0	0	0	0	0	0	0	0	0	0	0	0	0	0	0	0	0	0	0	0	0.1	0.01	0	0	0	0	0	0	0	0	0	0.05		0	0	0
486	d__Bacteria; p__Spirochaetota; c__Spirochaetia; o__Treponematales; f__Treponemataceae; g__Spiro-10				rare	0.29	0.00597015	4	5.97015			0	0	0	0	0	0	0	0	0	0	0	0	0	0	0	0	0	0	0	0	0	0	0	0	0	0	0	0	0	0	0	0	0	0		0	0	0
487	d__Bacteria; p__Pseudomonadota; c__Alphaproteobacteria; o__Pelagibacterales; f__Pelagibacteraceae; g__SYDM01				rare	0.11	0.0058209	10	14.9254			0.04	0.01	0	0	0.04	0	0	0	0	0	0	0	0	0	0	0	0.01	0	0	0	0	0	0	0	0	0	0	0	0	0	0	0	0	0		0.04	0.05	0
488	d__Bacteria; p__Pseudomonadota; c__Alphaproteobacteria; o__Rickettsiales; f__Deianiraeaceae; g__CAMCVL01				rare	0.14	0.0058209	12	17.9104			0	0.02	0	0	0	0.01	0	0	0.03	0	0	0.14	0	0.01	0	0.01	0	0.01	0	0	0	0	0	0.01	0	0	0	0	0	0	0.01	0	0	0		0	0	0
489	d__Bacteria; p__Pseudomonadota; c__Alphaproteobacteria; o__Sphingomonadales; f__Sphingomonadaceae; g__Aquisediminimonas				rare	0.07	0.0058209	10	14.9254			0	0.03	0	0	0	0	0	0	0	0	0	0	0	0.04	0	0.04	0	0.04	0	0	0	0	0.03	0	0	0.02	0.02	0	0	0	0.07	0	0.04	0		0	0	0
490	d__Bacteria; p__Pseudomonadota; c__Gammaproteobacteria; o__Legionellales; f__Legionellaceae; g__Tatlockia				rare	0.08	0.0058209	21	31.3433			0	0	0	0	0	0	0	0	0	0.01	0	0	0	0	0	0	0.01	0	0.01	0	0	0	0	0	0	0	0	0	0.01	0	0	0	0	0		0	0.01	0
491	d__Bacteria; p__Patescibacteria; c__ABY1; o__Magasanikbacterales; f__2-02-FULL-50-9b; g__2-02-FULL-50-9b				rare	0.3	0.0058209	4	5.97015			0	0	0	0	0	0	0	0	0	0	0	0	0	0	0	0	0	0	0	0	0	0	0	0	0	0	0	0	0	0	0	0	0	0		0	0	0
492	d__Bacteria; p__Actinomycetota; c__Actinomycetia; o__Nanopelagicales; f__S36-B12; g__CAINMH01				rare	0.07	0.0058209	17	25.3731			0.01	0.01	0	0	0	0	0	0.04	0	0.04	0.04	0.01	0	0	0.01	0	0	0	0	0	0	0	0	0.01	0	0	0.02	0	0.01	0	0.01	0	0	0.02		0	0	0
493	d__Bacteria; p__Bacteroidota; c__Bacteroidia; o__Cytophagales; f__Catalimonadaceae; g__CAMDMI01				rare	0.11	0.0058209	8	11.9403			0	0.04	0	0.02	0	0	0	0.03	0	0	0	0	0	0	0	0	0.11	0	0	0	0.06	0	0	0	0	0	0	0.08	0	0	0	0	0.04	0		0	0	0
494	d__Bacteria; p__Pseudomonadota; c__Gammaproteobacteria; o__Methylococcales; f__Methylomonadaceae; g__UBA4132				rare	0.13	0.00567164	7	10.4478			0	0	0	0	0	0	0	0	0	0	0	0	0	0	0	0	0	0	0	0	0	0	0	0	0	0	0	0	0	0	0	0	0	0.02		0	0	0
495	d__Archaea; p__Nanoarchaeota; c__Nanoarchaeia; o__Pacearchaeales; f__GW2011-AR1; g__SICV01				rare	0.17	0.00567164	9	13.4328			0	0	0	0	0	0	0	0	0	0	0	0	0	0	0	0	0	0	0	0	0	0	0	0	0	0	0	0	0	0	0	0	0	0		0.04	0.04	0.01
496	d__Bacteria; p__Patescibacteria; c__JAEDAM01; o__BD1-5; f__UBA6164; g__UBA7396				rare	0.28	0.00567164	5	7.46269			0	0	0	0	0	0	0	0	0	0	0	0	0	0	0	0	0	0	0	0	0	0	0	0	0	0	0	0	0	0	0	0	0	0		0	0	0
497	d__Bacteria; p__Pseudomonadota; c__Alphaproteobacteria; o__Acetobacterales; f__Acetobacteraceae; g__CAITOL01				rare	0.14	0.00567164	7	10.4478			0	0	0	0	0	0	0	0	0	0	0	0	0	0	0	0	0	0	0	0	0	0	0	0	0	0	0.11	0	0.05	0	0	0	0	0		0	0	0
498	d__Bacteria; p__Verrucomicrobiota; c__Kiritimatiellia; o__CAIKKV01; f__CAITUY01; g__CAMBRF01				rare	0.28	0.00567164	2	2.98507			0	0	0	0	0	0	0	0	0	0	0	0	0	0	0	0	0	0	0	0	0	0	0	0	0	0	0	0	0	0	0	0	0	0		0	0	0
499	d__Bacteria; p__Pseudomonadota; c__Alphaproteobacteria; o__Caulobacterales; f__TH1-2; g__Aquidulcibacter	taxonomy=Bacteria/Proteobacteria/Alphaproteobacteria/Caulobacterales/Hyphomonadaceae/UKL13-1		3	rare	0.16	0.00552239	10	14.9254	yes		0	0	0	0	0	0	0	0	0	0	0	0	0	0	0	0	0	0.03	0.03	0	0.16	0	0	0	0.01	0	0	0.06	0	0	0	0	0.01	0		0	0	0
500	d__Bacteria; p__Pseudomonadota; c__Gammaproteobacteria; o__Pseudomonadales; f__HTCC2089; g__SYFY01				rare	0.04	0.00552239	17	25.3731			0	0	0	0.01	0.01	0	0	0	0	0	0	0	0	0	0	0.01	0	0	0	0	0	0	0	0	0	0	0	0	0	0	0	0	0	0		0.04	0.03	0.02
501	d__Bacteria; p__Patescibacteria; c__Paceibacteria; o__UBA9983_A; f__W02-35-19; g__WO2-35-19				rare	0.05	0.00552239	22	32.8358			0	0	0	0	0.01	0	0	0	0	0.01	0.01	0.01	0	0	0	0	0	0	0	0	0.01	0	0	0.02	0	0	0	0	0.01	0	0	0	0	0.03		0	0	0
502	d__Bacteria; p__Patescibacteria; c__WWE3; o__UBA101185; f__UBA10185; g__CAMDGN01				rare	0.11	0.00552239	6	8.95522			0	0	0	0	0	0	0	0	0	0	0	0	0	0	0	0	0	0	0.09	0	0	0	0	0.04	0	0	0	0	0	0	0	0	0	0		0	0	0
503	d__Bacteria; p__Acidobacteriota; c__Vicinamibacteria; o__Vicinamibacterales; f__UBA2999; g__Gp6-AA45				rare	0.11	0.00552239	9	13.4328			0	0	0	0	0	0	0	0	0	0	0	0	0	0	0	0	0	0	0	0	0	0	0	0	0	0	0	0	0	0	0	0	0	0		0	0.01	0.07
504	d__Bacteria; p__Patescibacteria; c__Gracilibacteria; o__UBA1369; f__UBA12463; g__CALREA01				rare	0.19	0.00552239	5	7.46269			0	0	0	0	0	0	0	0	0	0	0	0	0	0	0	0	0	0	0	0	0	0	0	0	0	0	0	0	0	0	0	0	0	0		0	0	0.05
505	d__Bacteria; p__Acidobacteriota; c__Terriglobia; o__20CM-2-55-15; f__20CM-2-55-15; g__CAMBFR01				rare	0.11	0.00552239	5	7.46269			0	0	0	0	0	0	0	0	0	0	0	0	0	0	0	0	0	0	0	0	0	0	0	0	0	0	0	0	0	0	0	0	0	0		0	0	0.09
506	d__Bacteria; p__Bacteroidota; c__Bacteroidia; o__Flavobacteriales; f__Flavobacteriaceae; g__UBA3478				rare	0.06	0.00552239	20	29.8507			0	0.01	0	0.01	0.06	0.01	0.02	0	0.01	0.02	0.01	0.01	0	0.01	0.03	0.01	0.01	0	0.02	0	0.01	0	0.04	0.01	0.03	0	0.03	0	0	0	0	0	0	0		0	0	0
507	d__Bacteria; p__Myxococcota; c__Bradymonadia; o__UBA7976; f__UBA1532; g__CAINDO01				rare	0.1	0.00537313	14	20.8955			0	0	0	0	0	0	0	0	0	0	0	0.01	0	0.04	0	0.02	0	0.01	0	0	0	0	0.07	0	0	0.01	0	0	0	0	0	0	0	0		0.02	0	0
508	d__Bacteria; p__Actinomycetota; c__Actinomycetia; o__Nanopelagicales; f__Nanopelagicaceae; g__PALSA-747				rare	0.02	0.00537313	31	46.2687			0	0	0	0	0	0	0.01	0	0	0	0	0	0.01	0.01	0.01	0	0.01	0	0	0	0	0	0	0.01	0.01	0	0.02	0.01	0.02	0	0.01	0.01	0.01	0.01		0.01	0	0
509	d__Bacteria; p__Patescibacteria; c__Saccharimonadia; o__CAILAD01; f__BJGX01; g__CALRAY01				rare	0.11	0.00537313	5	7.46269			0	0	0	0	0	0	0	0	0	0	0	0	0	0	0	0	0	0	0.09	0	0	0	0	0	0	0	0	0	0	0	0	0	0	0		0	0	0
510	d__Bacteria; p__Patescibacteria; c__Paceibacteria; o__UBA9983_A; f__UBA1006; g__CAIXMG01				rare	0.13	0.00537313	6	8.95522			0	0	0	0	0	0	0	0	0	0	0	0	0	0	0	0	0	0	0	0	0	0	0	0	0	0	0	0	0	0	0	0	0	0		0	0	0
511	d__Bacteria; p__Latescibacterota; c__UBA2968; o__UBA8231; f__UBA8231; g__SICG01				rare	0.09	0.00537313	8	11.9403			0	0	0	0	0	0	0	0	0	0	0	0	0	0	0	0	0	0	0	0	0	0	0	0	0	0	0	0	0	0	0	0	0	0		0.01	0.07	0.05
512	d__Bacteria; p__Bacteroidota; c__Bacteroidia; o__UBA7662; f__UBA7662; g__F1-60-MAGs140				rare	0.3	0.00537313	2	2.98507			0	0	0	0	0	0	0	0	0	0	0	0	0	0	0	0	0	0	0	0	0.3	0	0	0	0	0.06	0	0	0	0	0	0	0	0		0	0	0
513	d__Bacteria; p__Pseudomonadota; c__Alphaproteobacteria; o__Paracaedibacterales; f__CAIULA01; g__CAIULA01				rare	0.09	0.00522388	18	26.8657			0	0.01	0.02	0.04	0.01	0	0	0	0	0	0	0	0.09	0	0.01	0	0	0.01	0	0	0	0	0	0	0	0	0	0	0	0	0	0	0.02	0		0.02	0.02	0.01
514	d__Bacteria; p__Pseudomonadota; c__Gammaproteobacteria; o__CAIQBE01; f__CAIQBE01; g__JAJZUD01				rare	0.14	0.00522388	8	11.9403			0	0	0	0.03	0	0	0	0	0	0	0	0	0.07	0	0	0	0	0	0	0	0	0	0	0	0	0	0	0	0.14	0	0	0	0.07	0		0	0	0
515	d__Bacteria; p__Verrucomicrobiota; c__Verrucomicrobiae; o__Opitutales; f__Opitutaceae; g__UBA2377				rare	0.17	0.00522388	5	7.46269			0	0	0	0	0	0	0	0	0	0	0	0	0	0	0	0	0	0	0	0	0	0	0	0	0	0	0	0	0	0	0	0	0	0		0	0	0
516	d__Bacteria; p__Patescibacteria; c__Saccharimonadia; o__CAILAD01; f__CAILAD01; g__CAILAD01				rare	0.07	0.00522388	20	29.8507			0.01	0	0	0	0	0	0	0	0	0	0	0	0	0	0	0.01	0	0	0.01	0	0	0	0	0	0.01	0	0	0	0	0	0	0	0	0		0.01	0.02	0
517	d__Bacteria; p__Verrucomicrobiota; c__Verrucomicrobiae; o__Chthoniobacterales; f__Chthoniobacteraceae; g__CAIURC01				rare	0.28	0.00522388	4	5.97015			0	0	0	0	0	0	0	0	0	0	0	0	0.05	0.28	0	0	0	0	0	0	0	0	0	0	0	0.01	0	0	0	0	0	0	0	0		0	0	0
518	d__Bacteria; p__Patescibacteria; c__Paceibacteria; o__UBA9983_A; f__GWA1-40-21; g__Bog-1340				rare	0.15	0.00522388	11	16.4179			0	0	0	0	0	0	0	0	0	0	0	0	0	0	0	0	0	0	0	0	0	0	0	0	0	0	0	0	0	0	0	0	0	0.04		0	0	0
519	d__Bacteria; p__Bdellovibrionota; c__UBA2428; o__UBA2428; f__UBA2428; g__CAMCVE01				rare	0.12	0.00522388	9	13.4328			0	0.01	0	0	0	0	0	0.03	0	0	0	0.12	0	0	0	0	0	0	0	0	0	0	0	0	0	0	0	0	0.01	0	0	0	0	0		0	0	0
520	d__Bacteria; p__Pseudomonadota; c__Alphaproteobacteria; o__Paracaedibacterales; f__VGCI01; g__VGCI01				rare	0.21	0.00522388	6	8.95522			0	0	0	0	0.01	0	0.21	0	0	0	0	0	0	0	0	0	0	0	0	0	0	0	0	0	0	0	0	0	0.01	0	0	0	0	0		0	0	0.01
521	d__Bacteria; p__Pseudomonadota; c__Gammaproteobacteria; o__Burkholderiales; f__Rhodocyclaceae; g__JACQYA01				rare	0.11	0.00522388	5	7.46269			0	0	0	0	0	0	0	0	0	0	0	0	0	0	0	0	0	0	0	0	0	0	0	0	0	0	0	0	0	0	0	0	0	0		0	0	0
522	d__Bacteria; p__Actinomycetota; c__Actinomycetia; o__Nanopelagicales; f__S36-B12; g__UBA10649				rare	0.16	0.00522388	9	13.4328			0	0	0	0	0	0	0	0	0	0	0	0	0	0	0	0	0	0	0	0	0	0	0	0	0	0	0	0.03	0	0	0	0	0	0.03		0	0	0
523	d__Bacteria; p__Myxococcota; c__UBA796; o__UBA796; f__SXON01; g__CAMAXZ01				rare	0.21	0.00507463	10	14.9254			0	0	0	0	0	0	0	0.04	0	0	0.02	0.21	0	0	0.01	0	0.01	0	0	0	0	0	0.01	0	0	0.01	0.01	0	0	0	0	0	0	0		0	0	0
524	d__Bacteria; p__Omnitrophota; c__Koll11; o__2-01-FULL-45-10; f__2-01-FULL-45-10; g__2-01-FULL-45-10				rare	0.07	0.00507463	15	22.3881			0	0	0	0	0	0	0	0	0	0	0	0	0	0	0	0	0	0	0	0	0	0	0	0.01	0	0	0	0	0	0	0	0	0	0.07		0	0	0
525	d__Bacteria; p__Bacteroidota; c__Bacteroidia; o__M30B66; f__M30B66; g__M30B66				rare	0.06	0.00507463	15	22.3881			0.03	0	0	0.01	0	0	0.02	0	0	0	0	0	0	0	0	0	0.02	0	0	0	0	0	0	0	0	0	0.01	0	0.04	0	0.03	0	0.02	0		0	0	0
526	d__Bacteria; p__Patescibacteria; c__Paceibacteria; o__UBA9983_A; f__CALRBT01; g__CALRBT01				rare	0.19	0.00507463	3	4.47761			0.05	0	0	0	0	0	0	0	0	0	0	0	0	0	0	0	0	0	0	0	0	0	0	0	0	0	0	0	0	0	0	0	0	0		0.1	0.19	0
527	d__Bacteria; p__Desulfobacterota; c__Desulfobulbia; o__Desulfobulbales; f__Desulfurivibrionaceae; g__UBA2262				rare	0.28	0.00507463	2	2.98507			0	0	0	0	0	0	0	0	0	0	0	0	0	0	0	0	0	0	0	0	0	0	0	0	0	0	0	0	0	0	0	0	0	0		0	0	0
528	d__Bacteria; p__Desulfobacterota_B; c__Binatia; o__UBA12015; f__UBA12015; g__SXLG01				rare	0.1	0.00507463	8	11.9403			0	0	0	0	0	0	0	0	0	0	0	0	0	0	0	0	0	0	0	0	0	0	0	0	0	0	0	0	0	0	0	0	0	0		0.03	0.07	0.04
529	d__Bacteria; p__Desulfobacterota_F; c__Desulfuromonadia; o__Geobacterales; f__Geobacteraceae_A; g__Geoanaerobacter				rare	0.34	0.00507463	1	1.49254			0	0	0	0	0	0	0	0	0	0	0	0	0	0	0	0	0	0	0	0	0	0	0	0	0	0	0	0	0	0	0	0	0	0		0	0	0
530	d__Bacteria; p__Pseudomonadota; c__Alphaproteobacteria; o__Rickettsiales; f__Rickettsiaceae; g__CAJBEU01				rare	0.2	0.00492537	7	10.4478			0	0	0	0	0	0	0	0	0	0	0	0	0	0	0	0	0	0	0.01	0	0	0.07	0	0.2	0	0	0.01	0	0.01	0	0.01	0	0	0		0	0	0
531	d__Bacteria; p__Myxococcota; c__UBA727; o__UBA727; f__JABDBI01; g__JAHFEG01				rare	0.05	0.00492537	13	19.403			0	0	0	0	0	0	0	0	0	0	0	0	0	0	0	0	0	0	0	0	0	0	0	0	0	0	0	0	0	0	0	0	0	0		0.03	0.04	0.04
532	d__Bacteria; p__Pseudomonadota; c__Gammaproteobacteria; o__Chromatiales; f__Chromatiaceae; g__Chromatium				rare	0.33	0.00492537	1	1.49254			0	0	0	0	0	0	0	0	0	0	0	0	0	0	0	0	0	0	0	0	0	0	0	0	0	0	0	0	0	0	0	0	0	0		0	0	0
533	d__Bacteria; p__Desulfobacterota; c__Desulfobacteria; o__Desulfobacterales; f__Desulfobacteraceae; g__Desulfamplus				rare	0.18	0.00492537	3	4.47761			0	0	0	0	0	0	0	0	0	0	0	0	0	0	0	0	0	0	0	0	0	0	0	0	0	0	0	0	0	0	0	0	0	0		0	0	0
534	d__Bacteria; p__Pseudomonadota; c__Alphaproteobacteria; o__SMXQ01; f__SMXQ01; g__CAMAVH01				rare	0.06	0.00477612	19	28.3582			0	0	0	0.01	0	0.01	0	0	0	0.04	0	0	0	0	0	0.01	0	0	0	0	0	0	0	0.02	0	0	0	0	0.01	0	0	0	0	0		0.01	0.01	0.01
535	d__Archaea; p__Nanoarchaeota; c__Nanoarchaeia; o__Pacearchaeales; f__GW2011-AR1; g__VGKP01				rare	0.23	0.00477612	2	2.98507			0	0	0	0	0	0	0	0	0	0	0	0	0	0	0	0	0	0	0	0	0	0	0	0	0	0	0	0	0	0	0	0	0	0		0	0	0
536	d__Bacteria; p__Patescibacteria; c__Paceibacteria; o__UBA9983_A; f__UBA10002; g__UBA10002				rare	0.18	0.00477612	3	4.47761			0	0	0	0	0	0	0	0	0	0	0	0	0	0	0	0	0	0	0	0	0	0	0	0	0	0	0	0	0	0	0	0	0	0		0	0	0
537	d__Bacteria; p__Pseudomonadota; c__Alphaproteobacteria; o__Rickettsiales; f__Deianiraeaceae; g__CAMCTP01				rare	0.08	0.00462687	11	16.4179			0	0	0	0.01	0	0.02	0	0.01	0	0	0	0	0	0.01	0	0	0	0	0	0	0	0	0	0	0	0	0.08	0	0	0	0.01	0	0	0		0	0	0
538	d__Bacteria; p__Pseudomonadota; c__Alphaproteobacteria; o__Rickettsiales; f__Midichloriaceae; g__Bandiella				rare	0.03	0.00462687	22	32.8358			0.01	0.03	0.01	0.01	0.01	0.02	0	0.01	0	0	0	0	0	0.01	0.01	0.01	0.02	0.03	0.02	0	0	0	0	0	0	0	0	0	0	0	0	0	0	0		0.02	0.01	0
539	d__Bacteria; p__Bacteroidota; c__Bacteroidia; o__Sphingobacteriales; f__Sphingobacteriaceae; g__SSFR01				rare	0.1	0.00462687	10	14.9254			0	0	0	0	0	0	0	0.01	0	0	0	0	0	0	0	0.1	0.01	0	0	0	0	0	0	0	0	0	0.07	0	0.01	0	0	0	0	0		0	0	0
540	d__Bacteria; p__Bdellovibrionota; c__Oligoflexia; o__Silvanigrellales; f__Silvanigrellaceae; g__Silvanigrella				rare	0.03	0.00462687	20	29.8507			0.01	0.02	0	0	0	0.01	0	0.03	0	0	0	0.02	0	0	0	0	0.01	0	0	0	0	0	0	0	0	0	0	0	0	0	0	0	0.03	0.03		0.01	0.01	0
541	d__Bacteria; p__Pseudomonadota; c__Alphaproteobacteria; o__Caulobacterales; f__Caulobacteraceae; g__CAISGS01				rare	0.1	0.00462687	9	13.4328			0	0.01	0	0	0	0	0	0	0	0	0	0	0	0	0	0	0.01	0.01	0	0	0	0	0	0	0	0	0.08	0	0	0	0	0.1	0	0.02		0	0	0
542	d__Bacteria; p__Verrucomicrobiota; c__Verrucomicrobiae; o__Chthoniobacterales; f__UBA6821; g__CAIWMF01				rare	0.05	0.00462687	17	25.3731			0.01	0.02	0	0	0	0.03	0	0	0	0.02	0	0	0	0	0	0	0	0	0	0	0	0	0	0	0.01	0	0	0	0	0	0	0	0	0		0.01	0	0
543	d__Bacteria; p__Acidobacteriota; c__Terriglobia; o__Bryobacterales; f__Bryobacteraceae; g__SYKU01				rare	0.18	0.00462687	2	2.98507			0	0	0	0	0	0	0	0	0	0	0	0	0	0	0	0	0	0	0	0	0	0	0	0	0	0	0	0	0	0	0	0	0	0		0	0	0
544	d__Bacteria; p__Bacillota_A; c__Clostridia; o__Peptostreptococcales; f__Anaerovoracaceae; g__JAENWH01				rare	0.23	0.00462687	3	4.47761			0	0	0	0	0	0	0	0	0	0	0	0	0	0	0	0	0	0	0	0	0	0	0	0	0	0	0	0	0	0	0	0	0	0		0	0	0
545	d__Bacteria; p__Omnitrophota; c__Koll11; o__Zapsychrales; f__Fredricksoniimonadaceae; g__GCA-2753745				rare	0.11	0.00462687	8	11.9403			0	0	0	0	0	0	0	0	0	0	0	0	0	0	0	0	0	0	0	0	0	0	0	0	0	0	0	0	0	0	0	0	0	0.03		0	0	0
546	d__Bacteria; p__Pseudomonadota; c__Alphaproteobacteria; o__Acetobacterales; f__Acetobacteraceae; g__Roseococcus				rare	0.23	0.00447761	3	4.47761			0	0	0	0	0	0	0	0.04	0	0	0	0	0	0	0	0	0	0	0	0	0	0	0	0	0	0	0	0.23	0	0	0	0	0	0		0	0	0
547	d__Bacteria; p__Pseudomonadota; c__Alphaproteobacteria; o__WRAU01; f__WRAU01; g__CAMCZU01				rare	0.24	0.00447761	6	8.95522			0	0.01	0	0	0	0	0	0	0	0	0.24	0.02	0.01	0	0	0	0	0	0	0	0	0	0	0	0	0	0	0	0	0	0	0	0	0		0	0	0
548	d__Bacteria; p__Pseudomonadota; c__Gammaproteobacteria; o__Burkholderiales; f__Burkholderiaceae; g__Janthinobacterium				rare	0.29	0.00447761	2	2.98507			0	0	0	0	0	0	0	0	0	0	0	0	0	0	0	0	0	0	0	0	0	0	0	0	0	0	0	0	0	0	0	0	0	0		0	0	0
549	d__Archaea; p__Halobacteriota; c__Methanomicrobia; o__Methanomicrobiales; f__Methanoregulaceae; g__Methanoregula				rare	0.09	0.00447761	8	11.9403			0	0	0	0	0	0	0	0	0	0	0	0	0	0	0	0	0	0	0	0	0	0	0	0	0	0	0	0	0	0	0	0	0	0.06		0	0	0
550	d__Bacteria; p__Patescibacteria; c__Microgenomatia; o__UBA1400; f__PJMF01; g__UBA1364				rare	0.15	0.00447761	2	2.98507			0	0	0	0	0	0	0	0	0	0	0	0	0	0	0	0	0	0	0	0	0	0	0	0	0	0	0	0	0	0	0	0	0	0		0	0	0
551	d__Bacteria; p__Patescibacteria; c__Microgenomatia; o__UBA1400; f__UBA12108; g__CAJAUT01				rare	0.16	0.00447761	8	11.9403			0	0	0	0	0	0	0	0	0	0	0	0	0	0	0	0	0	0	0	0	0	0	0	0.01	0	0	0	0	0	0	0	0	0	0		0	0	0
552	d__Bacteria; p__Patescibacteria; c__Paceibacteria; o__UBA9983_A; f__UBA9973; g__CALRGH01				rare	0.17	0.00447761	5	7.46269			0	0	0	0	0	0	0	0	0	0	0	0	0	0	0	0	0	0	0	0	0	0	0	0	0	0	0	0	0	0	0	0	0	0		0	0	0
553	d__Bacteria; p__Patescibacteria; c__Paceibacteria; o__UBA9983_A; f__Zambryskibacteraceae; g__SICJ01				rare	0.09	0.00447761	10	14.9254			0.02	0	0.02	0	0.01	0	0	0	0	0	0	0	0	0	0	0	0	0	0	0	0	0	0	0	0	0	0	0	0	0	0	0	0	0		0.01	0.02	0
554	d__Bacteria; p__Planctomycetota; c__GCA-002687715; o__GCA-002687715; f__GCA-002687715; g__SXUL01				rare	0.09	0.00447761	7	10.4478			0	0	0	0	0	0	0	0	0	0	0	0	0	0	0	0	0	0	0	0	0	0	0	0	0	0	0	0	0	0	0	0	0	0		0	0	0.02
555	d__Bacteria; p__Actinomycetota; c__Actinomycetia; o__Actinomycetales; f__Microbacteriaceae; g__UBA963				rare	0.04	0.00447761	19	28.3582			0	0.01	0	0	0	0	0	0.04	0.01	0	0.01	0.02	0	0	0	0	0	0.01	0.01	0	0.01	0	0.02	0	0	0	0	0	0.02	0	0.03	0	0	0.01		0	0	0
556	d__Bacteria; p__Chloroflexota; c__Anaerolineae; o__Anaerolineales; f__EnvOPS12; g__UBA5195				rare	0.16	0.00447761	5	7.46269			0	0	0	0	0	0	0	0	0	0	0	0	0	0	0	0	0	0	0	0	0	0	0	0	0	0	0	0	0	0	0	0	0	0		0	0	0
557	d__Bacteria; p__Pseudomonadota; c__Alphaproteobacteria; o__SHVT01; f__SHVT01; g__SHVT01				rare	0.06	0.00432836	9	13.4328			0	0	0	0	0	0	0	0	0	0	0	0	0	0	0	0	0	0	0	0	0	0	0	0	0	0	0	0	0	0	0	0	0	0		0	0.02	0.05
558	d__Bacteria; p__Pseudomonadota; c__Gammaproteobacteria; o__Legionellales; f__Legionellaceae; g__UBA2653				rare	0.04	0.00432836	16	23.8806			0	0.02	0	0	0	0	0	0.01	0	0	0	0.02	0.01	0.04	0	0.04	0	0.02	0	0	0	0	0	0	0	0.02	0	0	0	0	0	0	0	0		0	0.01	0
559	d__Bacteria; p__Myxococcota; c__Polyangia; o__Polyangiales; f__Polyangiaceae; g__CAMAVR01				rare	0.14	0.00432836	4	5.97015			0	0	0	0	0	0	0	0	0	0	0	0	0	0	0	0	0	0	0	0	0	0	0	0	0	0	0	0	0	0	0	0	0	0		0	0	0.09
560	d__Bacteria; p__Patescibacteria; c__Paceibacteria; o__SW-4-49-11; f__SW-4-49-11; g__CALRBF01				rare	0.22	0.00432836	3	4.47761			0	0	0	0	0	0	0	0	0	0	0	0	0	0	0	0	0	0	0	0	0	0	0	0	0	0	0	0.22	0	0	0	0	0	0		0	0	0
561	d__Bacteria; p__Patescibacteria; c__Paceibacteria; o__UBA9983_A; f__UBA6065; g__UBA6065				rare	0.07	0.00432836	14	20.8955			0	0	0	0	0	0	0	0	0	0.01	0	0.01	0	0	0	0	0	0	0	0	0	0	0	0.01	0	0	0	0	0	0	0	0	0	0		0	0	0
562	d__Bacteria; p__Armatimonadota; c__Chthonomonadetes; o__Chthonomonadales; f__Chthonomonadaceae; g__CAIJLM01				rare	0.14	0.00432836	6	8.95522			0	0	0	0	0	0	0	0	0	0	0	0	0	0	0	0	0	0	0	0	0	0	0	0	0	0	0	0	0	0	0	0	0	0		0	0.01	0.14
563	d__Bacteria; p__Chloroflexota; c__Anaerolineae; o__J036; f__J036; g__JAAFGM01				rare	0.06	0.00432836	12	17.9104			0	0	0	0	0	0	0	0	0	0	0	0	0	0	0	0.01	0	0	0.03	0	0	0	0	0	0	0.03	0	0	0	0	0	0	0	0		0	0	0
564	d__Bacteria; p__Eisenbacteria; c__RBG-16-71-46; o__RBG-16-71-46; f__RBG-16-71-46; g__CAIXRL01				rare	0.29	0.00432836	1	1.49254			0	0	0	0	0	0	0	0	0	0	0	0	0	0	0	0	0	0	0	0	0	0	0	0	0	0	0	0	0	0	0	0	0	0		0	0	0
565	d__Bacteria; p__Pseudomonadota; c__Alphaproteobacteria; o__Rhodobacterales; f__Rhodobacteraceae; g__Rhodobacter_F				rare	0.07	0.0041791	10	14.9254			0.01	0.01	0	0	0	0	0	0	0	0	0	0	0	0	0	0	0	0	0	0	0.02	0	0	0	0	0	0.03	0	0	0	0	0.07	0	0.01		0	0	0
566	d__Bacteria; p__Pseudomonadota; c__Gammaproteobacteria; o__Burkholderiales; f__Rhodocyclaceae; g__UBA2250				rare	0.14	0.0041791	8	11.9403			0	0	0	0	0	0	0	0	0	0	0	0	0	0	0	0	0	0	0	0	0	0	0	0	0	0	0	0	0	0	0	0	0	0.01		0	0	0
567	d__Bacteria; p__Chlamydiota; c__Chlamydiia; o__2-12-FULL-49-11; f__2-12-FULL-49-11; g__VGMD01				rare	0.09	0.0041791	10	14.9254			0	0	0	0	0	0	0	0	0	0	0	0	0	0	0	0	0	0	0.05	0	0	0	0	0	0	0	0	0	0	0	0	0	0	0		0	0	0
568	d__Bacteria; p__Actinomycetota; c__Actinomycetia; o__Actinomycetales; f__Microbacteriaceae; g__Microbacterium				rare	0.07	0.0041791	14	20.8955			0	0	0	0	0	0	0	0	0	0.01	0	0	0	0	0	0	0	0	0.02	0	0	0	0	0	0	0	0	0.01	0.01	0	0	0	0	0.01		0	0	0.01
569	d__Bacteria; p__Bacteroidota; c__Bacteroidia; o__Chitinophagales; f__Saprospiraceae; g__Saprospira				rare	0.12	0.0041791	8	11.9403			0	0.02	0	0	0	0	0	0	0	0	0	0.12	0	0	0	0	0	0.01	0	0	0	0	0	0	0	0	0.02	0.06	0	0	0	0	0.01	0		0	0	0
570	d__Bacteria; p__Bacteroidota; c__Bacteroidia; o__UBA10329; f__UBA10329; g__UBA10329				rare	0.1	0.0041791	7	10.4478			0	0	0	0	0	0	0	0	0	0	0	0	0	0	0	0	0	0	0	0	0	0	0	0	0	0	0	0	0	0	0	0	0	0		0	0	0
571	d__Bacteria; p__Bacteroidota; c__Bacteroidia; o__Bacteroidales; f__GCA-2748055; g__JACJXF01				rare	0.18	0.0041791	4	5.97015			0	0	0	0	0	0	0	0	0	0	0	0	0	0	0	0	0	0	0	0	0	0	0	0	0	0	0	0	0	0	0	0	0	0		0	0	0
572	d__Bacteria; p__Pseudomonadota; c__Alphaproteobacteria; o__Pelagibacterales; f__Pelagibacteraceae; g__Pelagibacter				rare	0.05	0.0041791	15	22.3881			0.01	0	0.02	0.01	0.02	0.01	0.01	0	0	0	0	0.01	0	0	0	0.01	0	0	0	0	0	0	0.01	0	0.01	0	0	0	0	0	0	0	0	0		0.02	0	0.02
573	d__Bacteria; p__Pseudomonadota; c__Alphaproteobacteria; o__Paracaedibacterales; f__CAIOTO01; g__CAIOTO01				rare	0.09	0.00402985	12	17.9104			0	0.01	0.09	0.04	0.01	0	0	0	0	0	0	0	0	0	0.01	0	0	0	0.04	0	0.01	0	0	0	0	0	0	0	0	0	0	0	0	0		0	0	0
574	d__Bacteria; p__Pseudomonadota; c__Alphaproteobacteria; o__Acetobacterales; f__Acetobacteraceae; g__Rhodopila				rare	0.06	0.00402985	13	19.403			0	0	0	0	0	0	0	0	0	0.02	0	0	0	0.01	0	0.01	0	0	0	0	0	0	0	0.01	0	0	0.02	0	0.02	0	0	0	0	0.01		0	0	0
575	d__Bacteria; p__Pseudomonadota; c__Alphaproteobacteria; o__Rhodobacterales; f__Rhodobacteraceae; g__CAMBWO01				rare	0.14	0.00402985	4	5.97015			0	0	0	0	0	0	0	0	0	0	0	0	0	0	0	0	0	0	0.06	0	0	0	0	0	0	0	0	0	0	0	0	0	0	0		0	0	0
576	d__Bacteria; p__Verrucomicrobiota; c__Verrucomicrobiae; o__Pedosphaerales; f__UBA11358; g__CAIKLQ01				rare	0.27	0.00402985	1	1.49254			0	0	0	0	0	0	0	0	0	0	0	0	0	0	0	0	0	0	0	0	0	0	0	0	0	0	0	0	0	0	0	0	0	0		0	0	0
577	d__Bacteria; p__Myxococcota; c__Bradymonadia; o__UBA7976; f__UBA1532; g__SHZC01				rare	0.15	0.00402985	8	11.9403			0	0	0	0	0	0	0	0	0	0	0	0	0	0	0	0	0	0	0	0	0	0	0	0	0	0	0	0	0	0	0	0	0	0		0.02	0	0
578	d__Bacteria; p__Planctomycetota; c__Planctomycetia; o__Pirellulales; f__PNKZ01; g__CAMCTH01				rare	0.07	0.00402985	9	13.4328			0	0	0	0	0	0	0	0	0	0	0	0	0	0	0	0	0	0	0	0	0	0	0	0	0	0	0	0	0.07	0	0	0	0	0		0.01	0.03	0
579	d__Bacteria; p__Chlamydiota; c__Chlamydiia; o__Chlamydiales; f__Rhabdochlamydiaceae; g__PALSA-1444				rare	0.12	0.00402985	8	11.9403			0	0	0	0	0	0	0	0	0	0	0	0	0	0	0	0	0	0	0	0	0	0	0	0	0	0	0.02	0	0.01	0	0	0	0	0		0	0	0.01
580	d__Bacteria; p__Pseudomonadota; c__Alphaproteobacteria; o__Rhizobiales; f__Hyphomicrobiaceae; g__CAMDBL01				rare	0.07	0.0038806	11	16.4179			0	0	0	0	0	0	0	0	0	0.02	0	0	0	0	0	0	0	0	0	0	0	0	0	0	0	0	0	0	0	0	0	0	0	0		0	0	0
581	d__Bacteria; p__Pseudomonadota; c__Gammaproteobacteria; o__Burkholderiales; f__Burkholderiaceae_B; g__Acidovorax				rare	0.07	0.0038806	12	17.9104			0	0	0	0	0	0	0.01	0	0	0	0	0	0	0.01	0	0	0.01	0	0	0	0	0	0	0	0	0	0.02	0.07	0	0	0	0	0	0		0	0	0
582	d__Bacteria; p__Patescibacteria; c__Paceibacteria; o__UBA9983_A; f__UBA9973; g__UBA4124				rare	0.08	0.0038806	8	11.9403			0	0	0	0	0	0	0	0	0	0	0	0	0	0	0	0	0	0	0	0	0	0	0	0	0	0	0	0	0	0	0.01	0	0	0		0	0	0
583	d__Bacteria; p__Chlamydiota; c__Chlamydiia; o__Chlamydiales; f__VFKH01; g__VFKH01				rare	0.05	0.00373134	12	17.9104			0.01	0	0	0	0	0	0	0	0	0	0	0	0	0	0.01	0	0	0	0	0	0	0	0	0	0	0	0	0	0	0	0	0	0	0		0.03	0.05	0
584	d__Bacteria; p__Cyanobacteriota; c__Cyanobacteriia; o__Pseudanabaenales; f__Pseudanabaenaceae; g__Pseudanabaena				rare	0.1	0.00373134	5	7.46269			0	0	0	0	0	0.01	0	0	0	0	0	0	0	0.01	0	0	0	0	0	0	0	0	0	0	0	0.09	0	0.1	0	0	0	0	0	0		0	0	0
585	d__Bacteria; p__Myxococcota; c__UBA796; o__UBA796; f__GCA-2862545; g__SXOB01				rare	0.24	0.00373134	2	2.98507			0	0	0	0	0	0	0	0	0	0	0	0	0	0	0	0	0	0	0	0	0	0	0	0	0	0	0	0	0	0	0	0	0	0		0	0	0
586	d__Bacteria; p__Chlamydiota; c__Chlamydiia; o__RGXB01; f__RGXB01; g__RGXB01				rare	0.06	0.00373134	9	13.4328			0	0	0	0	0	0	0.01	0	0.05	0	0	0	0	0	0	0.05	0	0	0	0	0	0	0	0	0	0.06	0	0	0	0	0	0	0	0.01		0	0	0
587	d__Bacteria; p__Bacteroidota; c__Bacteroidia; o__Chitinophagales; f__Chitinophagaceae; g__Lacibacter				rare	0.13	0.00373134	3	4.47761			0	0	0	0	0	0	0	0	0	0	0	0	0	0	0	0	0	0	0	0	0	0	0	0	0	0	0	0.11	0	0	0	0	0.13	0		0	0	0
588	d__Bacteria; p__Bacteroidota; c__Bacteroidia; o__J057; f__RFSG01; g__RFSG01				rare	0.25	0.00373134	1	1.49254			0	0	0	0	0	0	0	0	0	0	0	0	0	0	0	0	0	0	0	0	0	0	0	0	0	0	0	0.25	0	0	0	0	0	0		0	0	0
589	d__Bacteria; p__Planctomycetota; c__UBA1135; o__UBA1135; f__GCA-002686595; g__SXXH01				rare	0.16	0.00373134	5	7.46269			0	0	0	0	0	0	0	0	0.04	0	0	0	0	0	0	0.02	0	0.01	0	0	0	0	0.16	0.02	0	0	0	0	0	0	0	0	0	0		0	0	0
590	d__Bacteria; p__Pseudomonadota; c__Alphaproteobacteria; o__Rickettsiales; f__Midichloriaceae; g__JALQUO01				rare	0.07	0.00358209	10	14.9254			0	0.02	0	0	0	0.01	0	0	0	0	0	0	0	0.02	0.07	0	0	0.03	0	0	0	0	0	0	0	0.04	0	0.01	0.01	0	0	0	0	0		0	0	0
591	d__Bacteria; p__Pseudomonadota; c__Gammaproteobacteria; o__Legionellales; f__Legionellaceae; g__Legionella_A				rare	0.05	0.00358209	16	23.8806			0	0	0	0	0	0	0	0	0.02	0	0	0.05	0	0	0	0.01	0	0	0	0	0	0	0	0	0	0	0	0	0	0	0	0	0	0		0	0	0
592	d__Bacteria; p__Pseudomonadota; c__Gammaproteobacteria; o__Burkholderiales; f__Burkholderiaceae_A; g__UBA3064				rare	0.14	0.00358209	3	4.47761			0	0	0	0	0	0	0	0	0	0	0	0	0	0.04	0	0.06	0	0	0	0	0	0	0	0	0	0.14	0	0	0	0	0	0	0	0		0	0	0
593	d__Bacteria; p__Pseudomonadota; c__Gammaproteobacteria; o__Burkholderiales; f__JACQAP01; g__JACQAP01				rare	0.13	0.00358209	4	5.97015			0	0	0	0	0	0	0	0	0	0	0	0	0	0	0	0	0	0	0	0	0	0	0	0	0	0	0	0	0	0	0	0	0	0		0	0	0.08
594	d__Bacteria; p__Cyanobacteriota; c__Cyanobacteriia; o__Cyanobacteriales; f__Microcystaceae; g__Hydrococcus				rare	0.23	0.00358209	2	2.98507			0	0	0	0	0	0	0	0	0	0	0	0	0	0	0	0	0	0	0	0	0	0	0	0	0	0	0	0	0	0	0	0	0	0.01		0	0	0
595	d__Bacteria; p__Verrucomicrobiota; c__Verrucomicrobiae; o__Opitutales; f__Opitutaceae; g__CAMAXB01				rare	0.08	0.00358209	8	11.9403			0	0	0	0	0	0	0	0	0	0.05	0	0	0	0	0	0	0	0	0.01	0	0.01	0	0	0	0	0	0	0	0	0	0	0	0	0		0	0	0
596	d__Bacteria; p__Patescibacteria; c__JAEDAM01; o__Absconditabacterales; f__Absconditicoccaceae; g__CAJBLF01				rare	0.16	0.00358209	5	7.46269			0	0	0	0	0	0	0	0	0	0	0	0	0	0	0	0	0	0	0	0	0	0	0	0	0	0	0	0	0.01	0	0	0	0	0		0	0	0
597	d__Bacteria; p__Patescibacteria; c__Gracilibacteria; o__Peribacterales; f__Peribacteraceae; g__SICN01				rare	0.13	0.00358209	3	4.47761			0	0	0	0	0	0	0	0	0	0	0	0	0	0	0	0	0	0	0	0	0	0	0	0	0	0	0	0	0	0	0	0	0	0		0	0	0
598	d__Bacteria; p__Pseudomonadota; c__Alphaproteobacteria; o__Paracaedibacterales; f__CAIULA01; g__Finniella				rare	0.05	0.00358209	15	22.3881			0.01	0.01	0.01	0.02	0.01	0	0	0	0	0	0	0	0	0	0	0.01	0	0	0	0	0	0	0	0	0.01	0	0	0	0	0	0	0	0	0		0.01	0.01	0
599	d__Bacteria; p__Pseudomonadota; c__Gammaproteobacteria; o__Burkholderiales; f__Gallionellaceae; g__Sideroxyarcus				rare	0.05	0.00358209	11	16.4179			0	0	0	0	0	0	0	0	0	0.01	0	0	0	0	0	0	0	0	0	0	0	0	0	0.01	0	0	0	0	0	0	0	0	0	0.05		0	0	0
600	d__Bacteria; p__Verrucomicrobiota; c__Verrucomicrobiae; o__Verrucomicrobiales; f__V1-33; g__CAIZWU01				rare	0.11	0.00358209	6	8.95522			0.02	0.04	0	0.11	0	0	0	0	0	0	0	0	0	0	0	0	0	0	0	0	0	0	0	0	0	0	0.02	0	0	0	0	0	0	0		0	0	0
601	d__Bacteria; p__Bacteroidota; c__Bacteroidia; o__Chitinophagales; f__Chitinophagaceae; g__CAIXQW01				rare	0.09	0.00358209	6	8.95522			0	0	0	0	0	0	0	0	0	0	0	0	0	0	0	0.01	0	0	0	0	0	0	0	0	0	0	0.02	0	0.03	0.09	0	0	0	0.04		0	0	0
602	d__Bacteria; p__Dependentiae; c__Babeliae; o__Babeliales; f__CAIQNR01; g__CAIQNR01				rare	0.04	0.00343284	13	19.403			0	0	0	0	0	0.01	0	0	0	0	0	0	0	0	0	0.04	0	0	0	0	0	0	0	0	0	0	0	0	0	0	0	0	0	0		0	0	0
603	d__Bacteria; p__Pseudomonadota; c__Alphaproteobacteria; o__16-39-46; f__16-39-46; g__16-39-46				rare	0.07	0.00343284	8	11.9403			0	0	0	0	0	0	0	0	0	0	0	0	0	0	0	0	0	0	0	0	0	0	0	0	0.02	0	0	0	0	0	0	0	0	0		0	0.01	0
604	d__Bacteria; p__Myxococcota; c__UBA796; o__UBA796; f__SXON01; g__CAJBVW01				rare	0.07	0.00343284	10	14.9254			0	0	0	0.01	0	0	0	0	0.01	0	0.04	0	0	0	0	0	0	0.01	0	0	0	0	0	0.01	0	0	0.02	0	0	0	0	0	0	0		0	0	0
605	d__Bacteria; p__Patescibacteria; c__Paceibacteria; o__UBA9983_A; f__UBA918; g__Damh-18				rare	0.14	0.00343284	9	13.4328			0	0	0	0	0	0	0	0	0	0.01	0	0.01	0	0	0	0	0	0	0	0	0	0	0	0	0	0	0	0	0	0	0	0	0	0.01		0	0	0
606	d__Bacteria; p__Planctomycetota; c__Phycisphaerae; o__WQYP01; f__WQYP01; g__WQYP01				rare	0.14	0.00343284	2	2.98507			0	0	0	0	0	0	0	0	0	0	0	0	0	0	0	0	0	0	0	0	0	0	0	0	0	0	0	0	0	0	0	0	0	0		0	0	0
607	d__Bacteria; p__Actinomycetota; c__Actinomycetia; o__Nanopelagicales; f__Nanopelagicaceae; g__WLQV01				rare	0.1	0.00343284	5	7.46269			0	0	0	0	0	0	0	0	0	0	0	0	0	0	0	0	0	0	0	0	0	0	0	0	0	0	0.01	0	0.1	0	0	0	0	0		0	0	0
608	d__Bacteria; p__Campylobacterota; c__Campylobacteria; o__Campylobacterales; f__Sulfurospirillaceae; g__Sulfurospirillum				rare	0.11	0.00343284	4	5.97015			0	0	0	0	0	0	0	0	0	0	0	0	0	0	0	0	0	0	0	0	0	0	0	0	0	0	0	0	0	0	0	0	0	0		0	0	0
609	d__Bacteria; p__Desulfobacterota; c__Desulfobulbia; o__Desulfobulbales; f__Desulfobulbaceae; g__Desulfobulbus				rare	0.2	0.00343284	2	2.98507			0	0	0	0	0	0	0	0	0	0	0	0	0	0	0	0	0	0	0	0	0	0	0	0	0	0	0	0	0	0	0	0	0	0		0	0	0
[truncated: 1,100 more rows]
[truncated: 30 more columns]

## Sheet: 8-16S-phylum
Supplementary Data 8: Phylum-level classification of 16S rRNA metagenomic reads with SILVA.
[truncated: 19 more rows]
[truncated: 28 more columns]

[truncated: 13 more sheets: 9-16S-lineage, 10-singleM-global-genus, 11-Genome-stats, 12-MAGs, 13-Reference-genomes, 14-ANI, 15-AAI, 16-Recruitment, 17-Recruitment-global, 18-KEGG, 19-CRISPR, 20-meth-pathways, 21-CAZy]
